# Supplementary material
Source: Research Square preprint supplement (doi:10.21203/rs.3.rs-9358362/v1)
Supplement: Supplementary file 1 [file 835161a9fff5f5c6a5cf118e.docx]

| Table 1: Comprehensive Genomic Profile of *V. cholerae* Isolates by Region and Source | | | | | | | | |
| --- | --- | --- | --- | --- | --- | --- | --- | --- |
| **Genomic Attribute** | **Central Africa** | | **East Africa** | **North Africa** | **Southern Africa** | | **West Africa** | |
| **Clinical** | **Environmental** | **Clinical** | **Clinical** | **Clinical** | **Environmental** | **Clinical** | **Environmental** |
| **Total Isolates** | 737 | 19 | 850 | 8 | 158 | 22 | 235 | 55 |
| **Serogroup O1 (rfbV)** | 731 (99.2%) | 6 (31.6%) | 842 (99.1%) | 6 (75.0%) | 145 (91.8%) | 0 (0.0%) | 224 (95.3%) | 24 (43.6%) |
| **Biotype El Tor (rstR_et)** | 731 (99.2%) | 6 (31.6%) | 839 (98.7%) | 7 (87.5%) | 130 (82.3%) | 0 (0.0%) | 219 (93.2%) | 20 (36.4%) |
| **Biotype Classical (rstR_cc)** | 0 (0.0%) | 0 (0.0%) | 24 (2.8%) | 1 (12.5%) | 14 (8.9%) | 0 (0.0%) | 1 (0.4%) | 0 (0.0%) |
| **ctxA Positive** | 725 (98.4%) | 6 (31.6%) | 835 (98.2%) | 8 (100.0%) | 145 (91.8%) | 0 (0.0%) | 220 (93.6%) | 20 (36.4%) |
| **ctxB Positive** | 724 (98.2%) | 6 (31.6%) | 824 (96.9%) | 8 (100.0%) | 145 (91.8%) | 0 (0.0%) | 221 (94.0%) | 20 (36.4%) |
| **ctxB Variant 1 (Classical)** | 678 (92.0%) | 6 (31.6%) | 228 (26.8%) | 3 (37.5%) | 18 (11.4%) | 0 (0.0%) | 22 (9.4%) | 4 (7.3%) |
| **ctxB Variant 7 (El Tor)** | 46 (6.2%) | 0 (0.0%) | 597 (70.2%) | 4 (50.0%) | 127 (80.4%) | 0 (0.0%) | 196 (83.4%) | 16 (29.1%) |
| **Pandemic Marker (VC2346)** | 732 (99.3%) | 7 (36.8%) | 844 (99.3%) | 5 (62.5%) | 130 (82.3%) | 0 (0.0%) | 223 (94.9%) | 24 (43.6%) |
| **VPI-1 (VC0819)** | 724 (98.2%) | 9 (47.4%) | 839 (98.7%) | 8 (100.0%) | 145 (91.8%) | 1 (4.5%) | 222 (94.5%) | 23 (41.8%) |
| **VPI-2 (VC1758)** | 735 (99.7%) | 13 (68.4%) | 847 (99.6%) | 8 (100.0%) | 154 (97.5%) | 11 (50.0%) | 227 (96.6%) | 27 (49.1%) |
| **VSP-1 (VC0175)** | 732 (99.3%) | 6 (31.6%) | 842 (99.1%) | 5 (62.5%) | 130 (82.3%) | 0 (0.0%) | 222 (94.5%) | 24 (43.6%) |
| **VSP-2 (VC0490)** | 731 (99.2%) | 6 (31.6%) | 843 (99.2%) | 5 (62.5%) | 130 (82.3%) | 0 (0.0%) | 222 (94.5%) | 24 (43.6%) |
| **T6SS (VasX)** | 734 (99.6%) | 7 (36.8%) | 847 (99.6%) | 8 (100.0%) | 148 (93.7%) | 5 (22.7%) | 226 (96.2%) | 31 (56.4%) |

Notes: Percentages represent the proportion of isolates within the specific regional and source category carrying the designated genomic marker.
