# Supplementary material
Source: Research Square preprint supplement (doi:10.21203/rs.3.rs-9358362/v1)
Supplement: Supplementary file 2 [file d176659cf72d03ea8a8306ca.xlsx]

## Sheet: Table S1
Sample	BioSample	Strain	Isolate	Location	Run	Lat/Lon	Country	africa_region	...18	Province	isolation_source_clean	host_clean	isolation_type_clean	collection_year
GCA_015741235.1	SAMEA7177418	CF00214281	PDT000893871.1	South Africa: KwaZulu-Natal	ERR4452315	NA	South Africa	Southern Africa		KwaZulu-Natal	Environmental (Water)			2020
GCA_015741265.1	SAMEA7177410	CF00189284	PDT000893863.1	South Africa: KwaZulu-Natal	ERR4452307	NA	South Africa	Southern Africa		KwaZulu-Natal	Environmental (Water)			2018
GCA_015741355.1	SAMEA7177413	OA01603367	PDT000893866.1	South Africa: Limpopo	ERR4452310	NA	South Africa	Southern Africa		Limpopo	Environmental (Water)			2018
GCA_015746985.1	SAMEA5206253	Zb3	PDT000795308.1	Tanzania	ERR3039968	NA	Tanzania	East Africa				Human	Clinical	2016
GCA_015747005.1	SAMEA5206252	Zb2	PDT000795307.1	Tanzania	ERR3039967	NA	Tanzania	East Africa				Human	Clinical	2016
GCA_015747025.1	SAMEA5206250	Tg2	PDT000795305.1	Tanzania	ERR3039965	NA	Tanzania	East Africa				Human	Clinical	2015
GCA_015747045.1	SAMEA5206244	Mz2	PDT000795299.1	Tanzania	ERR3039959	NA	Tanzania	East Africa				Human	Clinical	2016
GCA_015747065.1	SAMEA5206229	Fish2	PDT000795286.1	Tanzania	ERR3039944	NA	Tanzania	East Africa				Aquatic/Environmental		2017
GCA_015747085.1	SAMEA5206247	Sg1	PDT000795302.1	Tanzania	ERR3039962	NA	Tanzania	East Africa				Human	Clinical	2017
GCA_015747125.1	SAMEA5206239	Mb1	PDT000795294.1	Tanzania	ERR3039954	NA	Tanzania	East Africa				Human	Clinical	2017
GCA_015747145.1	SAMEA5206237	Kg1	PDT000795292.1	Tanzania	ERR3039952	NA	Tanzania	East Africa				Human	Clinical	2015
GCA_015747165.1	SAMEA5206241	Mo1	PDT000795296.1	Tanzania	ERR3039956	NA	Tanzania	East Africa				Human	Clinical	2016
GCA_015747185.1	SAMEA5206238	Kg2	PDT000795293.1	Tanzania	ERR3039953	NA	Tanzania	East Africa				Human	Clinical	2015
GCA_015747205.1	SAMEA5206240	Mb2	PDT000795295.1	Tanzania	ERR3039955	NA	Tanzania	East Africa				Human	Clinical	2017
GCA_015747225.1	SAMEA5206236	Dr2	PDT000795291.1	Tanzania	ERR3039951	NA	Tanzania	East Africa				Human	Clinical	2017
GCA_015747235.1	SAMEA5206234	Plankton3	PDT000795289.1	Tanzania	ERR3039949	NA	Tanzania	East Africa				Aquatic/Environmental		2017
GCA_015747265.1	SAMEA5206233	Plankton2	PDT000795288.1	Tanzania	ERR3039948	NA	Tanzania	East Africa				Aquatic/Environmental		2017
GCA_015749965.1	SAMEA5559702	NA	PDT000793525.1	Democratic Republic of the Congo	ERR3269034	NA	Democratic Republic of the Congo	Central Africa				Human	Clinical	2016
GCA_015750005.1	SAMEA5559699	NA	PDT000793522.1	Democratic Republic of the Congo	ERR3269031	NA	Democratic Republic of the Congo	Central Africa				Human	Clinical	2016
GCA_015750145.1	SAMEA5559737	NA	PDT000793560.1	Democratic Republic of the Congo	ERR3269069	NA	Democratic Republic of the Congo	Central Africa				Human	Clinical	2015
GCA_015750205.1	SAMEA5559681	NA	PDT000793504.1	Democratic Republic of the Congo	ERR3269013	NA	Democratic Republic of the Congo	Central Africa				Human	Clinical	2015
GCA_015750285.1	SAMEA5559732	NA	PDT000793555.1	Democratic Republic of the Congo	ERR3269064	NA	Democratic Republic of the Congo	Central Africa				Human	Clinical	2014
GCA_015750305.1	SAMEA5559726	NA	PDT000793549.1	Democratic Republic of the Congo	ERR3269058	NA	Democratic Republic of the Congo	Central Africa				Human	Clinical	2014
GCA_015750345.1	SAMEA5559728	NA	PDT000793551.1	Democratic Republic of the Congo	ERR3269060	NA	Democratic Republic of the Congo	Central Africa				Human	Clinical	2014
GCA_015750365.1	SAMEA5559734	NA	PDT000793557.1	Democratic Republic of the Congo	ERR3269066	NA	Democratic Republic of the Congo	Central Africa				Human	Clinical	2015
GCA_015750405.4	SAMEA5559730	NA	PDT000793553.6	Democratic Republic of the Congo	ERR10149446	NA	Democratic Republic of the Congo	Central Africa				Human	Clinical	2014
GCA_015750465.1	SAMEA5559718	NA	PDT000793541.1	Democratic Republic of the Congo	ERR3269050	NA	Democratic Republic of the Congo	Central Africa				Human	Clinical	2015
GCA_015750485.1	SAMEA5559733	NA	PDT000793556.1	Democratic Republic of the Congo	ERR3269065	NA	Democratic Republic of the Congo	Central Africa				Human	Clinical	2015
GCA_015750505.1	SAMEA5559727	NA	PDT000793550.1	Democratic Republic of the Congo	ERR3269059	NA	Democratic Republic of the Congo	Central Africa				Human	Clinical	2014
GCA_015750525.1	SAMEA5559719	NA	PDT000793542.1	Democratic Republic of the Congo	ERR3269051	NA	Democratic Republic of the Congo	Central Africa				Human	Clinical	2014
GCA_015750545.1	SAMEA5559709	NA	PDT000793532.1	Democratic Republic of the Congo	ERR3269041	NA	Democratic Republic of the Congo	Central Africa				Human	Clinical	2014
GCA_015750565.1	SAMEA5559712	NA	PDT000793535.1	Democratic Republic of the Congo	ERR3269044	NA	Democratic Republic of the Congo	Central Africa				Human	Clinical	2014
GCA_015750585.1	SAMEA5559716	NA	PDT000793539.1	Democratic Republic of the Congo	ERR3269048	NA	Democratic Republic of the Congo	Central Africa				Human	Clinical	2015
GCA_015750605.1	SAMEA5559711	NA	PDT000793534.1	Democratic Republic of the Congo	ERR3269043	NA	Democratic Republic of the Congo	Central Africa				Human	Clinical	2015
GCA_015750645.1	SAMEA5559710	NA	PDT000793533.1	Democratic Republic of the Congo	ERR3269042	NA	Democratic Republic of the Congo	Central Africa				Human	Clinical	2014
GCA_015750665.1	SAMEA5559694	NA	PDT000793517.1	Democratic Republic of the Congo	ERR3269026	NA	Democratic Republic of the Congo	Central Africa				Human	Clinical	2016
GCA_015750685.1	SAMEA5559703	NA	PDT000793526.1	Democratic Republic of the Congo	ERR3269035	NA	Democratic Republic of the Congo	Central Africa				Human	Clinical	2016
GCA_015750705.1	SAMEA5559689	NA	PDT000793512.1	Democratic Republic of the Congo	ERR3269021	NA	Democratic Republic of the Congo	Central Africa				Human	Clinical	2016
GCA_015750725.4	SAMEA5559682	NA	PDT000793505.6	Democratic Republic of the Congo	ERR10146578	NA	Democratic Republic of the Congo	Central Africa				Human	Clinical	2016
GCA_015750745.4	SAMEA5559684	NA	PDT000793507.6	Democratic Republic of the Congo	ERR10146579	NA	Democratic Republic of the Congo	Central Africa				Human	Clinical	2016
GCA_015750765.1	SAMEA5559692	NA	PDT000793515.1	Democratic Republic of the Congo	ERR3269024	NA	Democratic Republic of the Congo	Central Africa				Human	Clinical	2016
GCA_015750785.4	SAMEA5559690	NA	PDT000793513.6	Democratic Republic of the Congo	ERR10149430	NA	Democratic Republic of the Congo	Central Africa				Human	Clinical	2016
GCA_015750795.1	SAMEA5559687	NA	PDT000793510.1	Democratic Republic of the Congo	ERR3269019	NA	Democratic Republic of the Congo	Central Africa				Human	Clinical	2016
GCA_015750825.1	SAMEA5559686	NA	PDT000793509.1	Democratic Republic of the Congo	ERR3269018	NA	Democratic Republic of the Congo	Central Africa				Human	Clinical	2016
GCA_015750845.1	SAMEA5559688	NA	PDT000793511.1	Democratic Republic of the Congo	ERR3269020	NA	Democratic Republic of the Congo	Central Africa				Human	Clinical	2016
GCA_015750865.1	SAMEA5559675	NA	PDT000793498.1	Democratic Republic of the Congo	ERR3269007	NA	Democratic Republic of the Congo	Central Africa				Human	Clinical	2015
GCA_015750885.4	SAMEA5559660	NA	PDT000793483.6	Democratic Republic of the Congo	ERR10146576	NA	Democratic Republic of the Congo	Central Africa				Human	Clinical	2017
GCA_015750905.1	SAMEA5559666	NA	PDT000793489.1	Democratic Republic of the Congo	ERR3268998	NA	Democratic Republic of the Congo	Central Africa				Human	Clinical	2015
GCA_015750915.1	SAMEA5559664	NA	PDT000793487.1	Democratic Republic of the Congo	ERR3268996	NA	Democratic Republic of the Congo	Central Africa				Human	Clinical	2015
GCA_015750945.1	SAMEA5559673	NA	PDT000793496.1	Democratic Republic of the Congo	ERR3269005	NA	Democratic Republic of the Congo	Central Africa				Human	Clinical	2015
GCA_015750965.1	SAMEA5559668	NA	PDT000793491.1	Democratic Republic of the Congo	ERR3269000	NA	Democratic Republic of the Congo	Central Africa				Human	Clinical	2015
GCA_015750975.1	SAMEA5559676	NA	PDT000793499.1	Democratic Republic of the Congo	ERR3269008	NA	Democratic Republic of the Congo	Central Africa				Human	Clinical	2015
GCA_015750995.1	SAMEA5559663	NA	PDT000793486.1	Democratic Republic of the Congo	ERR3268995	NA	Democratic Republic of the Congo	Central Africa				Human	Clinical	2015
GCA_015751005.1	SAMEA5559665	NA	PDT000793488.1	Democratic Republic of the Congo	ERR3268997	NA	Democratic Republic of the Congo	Central Africa				Human	Clinical	2015
GCA_015753925.1	SAMN07632699	K23	PDT000789150.1	Kenya	SRR6027710	NA	Kenya	East Africa			Clinical (Human)			1983
GCA_015754985.1	SAMN07632669	A3	PDT000789077.1	Kenya	SRR6027637	NA	Kenya	East Africa			Clinical (Human)			1981
GCA_015755065.1	SAMN07632670	A4	PDT000789076.1	Kenya	SRR6027636	NA	Kenya	East Africa			Clinical (Human)			1981
GCA_015755125.1	SAMN07632674	A9	PDT000789073.1	Kenya	SRR6027633	NA	Kenya	East Africa			Clinical (Human)			1981
GCA_015755145.1	SAMN07632664	A1	PDT000789075.1	Kenya	SRR6027635	NA	Kenya	East Africa			Clinical (Human)			1981
GCA_015755165.1	SAMN07632668	A2	PDT000789074.1	Kenya	SRR6027634	NA	Kenya	East Africa			Clinical (Human)			1981
GCA_015755185.1	SAMN07632665	A11	PDT000789072.1	Kenya	SRR6027632	NA	Kenya	East Africa			Clinical (Human)			1981
GCA_015755205.1	SAMN07632672	A6	PDT000789071.1	Kenya	SRR6027631	NA	Kenya	East Africa			Clinical (Human)			1981
GCA_015755225.1	SAMN07632673	A8	PDT000789070.1	Kenya	SRR6027630	NA	Kenya	East Africa			Clinical (Human)			1981
GCA_015755245.1	SAMN07632666	A13	PDT000789069.1	Kenya	SRR6027629	NA	Kenya	East Africa			Clinical (Human)			1981
GCA_015755265.1	SAMN07632671	A59	PDT000789068.1	Kenya	SRR6027628	NA	Kenya	East Africa			Clinical (Human)			1981
GCA_015774795.1	SAMN14048690	NA	PDT000682459.1	South Africa	SRR11032119	NA	South Africa	Southern Africa			Clinical (Human)	Human	Clinical	2019
GCA_015818575.1	SAMN03436157	2015EL-1161	PDT000150512.2	Kenya	SRR1931711	NA	Kenya	East Africa					Clinical
GCA_015818615.1	SAMN03436158	2015EL-1162	PDT000150513.2	Kenya	SRR1931714	NA	Kenya	East Africa					Clinical
GCA_015818635.1	SAMN03436156	2015EL-1160	PDT000150511.2	Kenya	SRR1931710	NA	Kenya	East Africa					Clinical
GCA_015818655.1	SAMN03436155	2015EL-1159	PDT000150510.2	Kenya	SRR1931709	NA	Kenya	East Africa					Clinical
GCA_015819115.1	SAMN03436152	2015EL-1156	PDT000150507.2	Kenya	SRR1931702	NA	Kenya	East Africa					Clinical
GCA_015819135.1	SAMN03436154	2015EL-1158	PDT000150509.2	Kenya	SRR1931708	NA	Kenya	East Africa					Clinical
GCA_015819185.1	SAMN03436153	2015EL-1157	PDT000150508.2	Kenya	SRR1931707	NA	Kenya	East Africa					Clinical
GCA_015958885.1	SAMEA7177411	YA00059721	PDT000893864.1	Kenya	ERR4452308	NA	Kenya	East Africa			Clinical (Human)		Clinical	2017
GCA_015958965.1	SAMEA7177412	YA00059741	PDT000893865.1	Kenya	ERR4452309	NA	Kenya	East Africa			Clinical (Human)		Clinical	2017
GCA_015959045.1	SAMEA7177417	YA00134463	PDT000893870.1	South Africa: Limpopo	ERR4452314	NA	South Africa	Southern Africa		Limpopo	Clinical (Human)		Clinical	2018
GCA_015959105.1	SAMEA7177424	YA00193061	PDT000893872.1	South Africa: KwaZulu-Natal	ERR4452321	NA	South Africa	Southern Africa		KwaZulu-Natal	Clinical (Human)		Clinical	2020
GCA_015959125.1	SAMEA7177416	YA00104374	PDT000893869.1	Angola	ERR4452313	NA	Angola	Central Africa			Clinical (Human)		Clinical	2018
GCA_015959145.1	SAMEA7177415	YA00059736	PDT000893868.1	Kenya	ERR4452312	NA	Kenya	East Africa			Clinical (Human)		Clinical	2017
GCA_015959165.1	SAMEA7177414	YA00059733	PDT000893867.1	Kenya	ERR4452311	NA	Kenya	East Africa			Clinical (Human)		Clinical	2017
GCA_016134565.1	SAMEA7177421	YA00132994	PDT000918050.1	South Africa: Limpopo	ERR4452318	NA	South Africa	Southern Africa		Limpopo	Clinical (Human)		Clinical	2018
GCA_016140185.1	SAMEA7177425	YA00085869	PDT000917929.1	South Africa: KwaZulu-Natal	ERR4452322	NA	South Africa	Southern Africa		KwaZulu-Natal	Clinical (Human)		Clinical	2018
GCA_016164155.1	SAMEA5206255	Zb5	PDT000795310.1	Tanzania	ERR3039970	NA	Tanzania	East Africa				Human	Clinical	2017
GCA_018036305.1	SAMEA7177426	YA00121908	PDT000893873.1	South Africa: Gauteng	ERR4452323	NA	South Africa	Southern Africa		Gauteng	Clinical (Human)		Clinical	2018
GCA_018073665.1	SAMEA5206256	Zb6	PDT000795311.1	Tanzania	ERR3039971	NA	Tanzania	East Africa				Human	Clinical	2017
GCA_018073725.1	SAMEA5206254	Zb4	PDT000795309.1	Tanzania	ERR3039969	NA	Tanzania	East Africa				Human	Clinical	2017
GCA_018073745.1	SAMEA5206251	Zb1	PDT000795306.1	Tanzania	ERR3039966	NA	Tanzania	East Africa				Human	Clinical	2016
GCA_018073925.1	SAMEA5206249	Tg1	PDT000795304.1	Tanzania	ERR3039964	NA	Tanzania	East Africa				Human	Clinical	2015
GCA_018073945.1	SAMEA5206248	Sg2	PDT000795303.1	Tanzania	ERR3039963	NA	Tanzania	East Africa				Human	Clinical	2017
GCA_018073965.1	SAMEA5206245	Rv1	PDT000795300.1	Tanzania	ERR3039960	NA	Tanzania	East Africa				Human	Clinical	2017
GCA_018073985.1	SAMEA5206246	Rv2	PDT000795301.1	Tanzania	ERR3039961	NA	Tanzania	East Africa				Human	Clinical	2017
GCA_018074005.1	SAMEA5206243	Mz1	PDT000795298.1	Tanzania	ERR3039958	NA	Tanzania	East Africa				Human	Clinical	2016
GCA_018074025.1	SAMEA5206242	Mo2	PDT000795297.1	Tanzania	ERR3039957	NA	Tanzania	East Africa				Human	Clinical	2016
GCA_018074045.1	SAMEA5206235	Dr1	PDT000795290.1	Tanzania	ERR3039950	NA	Tanzania	East Africa				Human	Clinical	2017
GCA_018074085.1	SAMEA5206228	Fish1	PDT000795285.1	Tanzania	ERR3039943	NA	Tanzania	East Africa				Aquatic/Environmental		2017
GCA_018074625.1	SAMEA5559731	NA	PDT000793554.1	Democratic Republic of the Congo	ERR3269063	NA	Democratic Republic of the Congo	Central Africa				Human	Clinical	2014
GCA_018074665.1	SAMEA5559729	NA	PDT000793552.1	Democratic Republic of the Congo	ERR3269061	NA	Democratic Republic of the Congo	Central Africa				Human	Clinical	2014
GCA_018074685.1	SAMEA5559724	NA	PDT000793547.1	Democratic Republic of the Congo	ERR3269056	NA	Democratic Republic of the Congo	Central Africa				Human	Clinical	2014
GCA_018074705.1	SAMEA5559723	NA	PDT000793546.1	Democratic Republic of the Congo	ERR3269055	NA	Democratic Republic of the Congo	Central Africa				Human	Clinical	2014
GCA_018074725.1	SAMEA5559725	NA	PDT000793548.1	Democratic Republic of the Congo	ERR3269057	NA	Democratic Republic of the Congo	Central Africa				Human	Clinical	2014
GCA_018074745.1	SAMEA5559722	NA	PDT000793545.1	Democratic Republic of the Congo	ERR3269054	NA	Democratic Republic of the Congo	Central Africa				Human	Clinical	2014
GCA_018074765.1	SAMEA5559721	NA	PDT000793544.1	Democratic Republic of the Congo	ERR3269053	NA	Democratic Republic of the Congo	Central Africa				Human	Clinical	2014
GCA_018074785.1	SAMEA5559720	NA	PDT000793543.1	Democratic Republic of the Congo	ERR3269052	NA	Democratic Republic of the Congo	Central Africa				Human	Clinical	2014
GCA_018074805.1	SAMEA5559715	NA	PDT000793538.1	Democratic Republic of the Congo	ERR3269047	NA	Democratic Republic of the Congo	Central Africa				Human	Clinical	2015
GCA_018074825.1	SAMEA5559717	NA	PDT000793540.1	Democratic Republic of the Congo	ERR3269049	NA	Democratic Republic of the Congo	Central Africa				Human	Clinical	2015
GCA_018074845.1	SAMEA5559713	NA	PDT000793536.1	Democratic Republic of the Congo	ERR3269045	NA	Democratic Republic of the Congo	Central Africa				Human	Clinical	2014
GCA_018074885.1	SAMEA5559706	NA	PDT000793529.1	Democratic Republic of the Congo	ERR3269038	NA	Democratic Republic of the Congo	Central Africa				Human	Clinical	2016
GCA_018074905.1	SAMEA5559707	NA	PDT000793530.1	Democratic Republic of the Congo	ERR3269039	NA	Democratic Republic of the Congo	Central Africa				Human	Clinical	2014
GCA_018074925.1	SAMEA5559705	NA	PDT000793528.1	Democratic Republic of the Congo	ERR3269037	NA	Democratic Republic of the Congo	Central Africa				Human	Clinical	2016
GCA_018074955.1	SAMEA5559704	NA	PDT000793527.1	Democratic Republic of the Congo	ERR3269036	NA	Democratic Republic of the Congo	Central Africa				Human	Clinical	2016
GCA_018074985.1	SAMEA5559697	NA	PDT000793520.1	Democratic Republic of the Congo	ERR3269029	NA	Democratic Republic of the Congo	Central Africa				Human	Clinical	2015
GCA_018075015.1	SAMEA5559696	NA	PDT000793519.1	Democratic Republic of the Congo	ERR3269028	NA	Democratic Republic of the Congo	Central Africa				Human	Clinical	2015
GCA_018075045.1	SAMEA5559695	NA	PDT000793518.1	Democratic Republic of the Congo	ERR3269027	NA	Democratic Republic of the Congo	Central Africa				Human	Clinical	2016
GCA_018075065.4	SAMEA5559693	NA	PDT000793516.6	Democratic Republic of the Congo	ERR10149434	NA	Democratic Republic of the Congo	Central Africa				Human	Clinical	2016
GCA_018075105.1	SAMEA5559691	NA	PDT000793514.1	Democratic Republic of the Congo	ERR3269023	NA	Democratic Republic of the Congo	Central Africa				Human	Clinical	2016
GCA_018083565.4	SAMEA5559685	NA	PDT000793508.6	Democratic Republic of the Congo	ERR10146580	NA	Democratic Republic of the Congo	Central Africa				Human	Clinical	2016
GCA_018083625.4	SAMEA5559679	NA	PDT000793502.6	Democratic Republic of the Congo	ERR10146577	NA	Democratic Republic of the Congo	Central Africa				Human	Clinical	2015
GCA_018083665.1	SAMEA5559683	NA	PDT000793506.1	Democratic Republic of the Congo	ERR3269015	NA	Democratic Republic of the Congo	Central Africa				Human	Clinical	2016
GCA_018083685.1	SAMEA5559678	NA	PDT000793501.1	Democratic Republic of the Congo	ERR3269010	NA	Democratic Republic of the Congo	Central Africa				Human	Clinical	2015
GCA_018083705.1	SAMEA5559677	NA	PDT000793500.1	Democratic Republic of the Congo	ERR3269009	NA	Democratic Republic of the Congo	Central Africa				Human	Clinical	2015
GCA_018083725.1	SAMEA5559680	NA	PDT000793503.1	Democratic Republic of the Congo	ERR3269012	NA	Democratic Republic of the Congo	Central Africa				Human	Clinical	2015
GCA_018083745.1	SAMEA5559672	NA	PDT000793495.1	Democratic Republic of the Congo	ERR3269004	NA	Democratic Republic of the Congo	Central Africa				Human	Clinical	2015
GCA_018083765.1	SAMEA5559674	NA	PDT000793497.1	Democratic Republic of the Congo	ERR3269006	NA	Democratic Republic of the Congo	Central Africa				Human	Clinical	2015
GCA_018083785.1	SAMEA5559671	NA	PDT000793494.1	Democratic Republic of the Congo	ERR3269003	NA	Democratic Republic of the Congo	Central Africa				Human	Clinical	2015
GCA_018083805.1	SAMEA5559670	NA	PDT000793493.1	Democratic Republic of the Congo	ERR3269002	NA	Democratic Republic of the Congo	Central Africa				Human	Clinical	2015
GCA_018083825.1	SAMEA5559667	NA	PDT000793490.1	Democratic Republic of the Congo	ERR3268999	NA	Democratic Republic of the Congo	Central Africa				Human	Clinical	2015
GCA_018083845.1	SAMEA5559669	NA	PDT000793492.1	Democratic Republic of the Congo	ERR3269001	NA	Democratic Republic of the Congo	Central Africa				Human	Clinical	2015
GCA_018083865.1	SAMEA5559662	NA	PDT000793485.1	Democratic Republic of the Congo	ERR3268994	NA	Democratic Republic of the Congo	Central Africa				Human	Clinical	2015
GCA_018083925.1	SAMEA5559661	NA	PDT000793484.1	Democratic Republic of the Congo	ERR3268993	NA	Democratic Republic of the Congo	Central Africa				Human	Clinical	2015
GCA_020162055.1	SAMN20306002	NA	PDT001138233.1	Democratic Republic of the Congo	SRR15192511	4.726055 S 27.657557 E	Democratic Republic of the Congo	Central Africa			Clinical (Human)	Human	Clinical	2016
GCA_020171135.1	SAMN20306005	NA	PDT001138252.1	Democratic Republic of the Congo	SRR15192530	4.308917 S 28.946855 E	Democratic Republic of the Congo	Central Africa			Clinical (Human)	Human	Clinical	2016
GCA_020171165.1	SAMN20306013	NA	PDT001138244.1	Democratic Republic of the Congo	SRR15192522	1.67886542 S 29.22441066 E	Democratic Republic of the Congo	Central Africa			Clinical (Human)	Human	Clinical	2017
GCA_020172345.1	SAMN20306010	NA	PDT001138247.1	Democratic Republic of the Congo	SRR15192525	1.3527161 S 29.37873 E	Democratic Republic of the Congo	Central Africa			Clinical (Human)	Human	Clinical	2017
GCA_020172365.1	SAMN20306012	NA	PDT001138245.1	Democratic Republic of the Congo	SRR15192523	1.67886542 S 29.22441066 E	Democratic Republic of the Congo	Central Africa			Clinical (Human)	Human	Clinical	2017
GCA_020172405.1	SAMN20306006	NA	PDT001138251.1	Democratic Republic of the Congo	SRR15192529	3.21838 S 28.25855 E	Democratic Republic of the Congo	Central Africa			Clinical (Human)	Human	Clinical	2016
GCA_020172415.1	SAMN20306017	NA	PDT001138239.1	Democratic Republic of the Congo	SRR15192517	1.65388 S 29.22479 E	Democratic Republic of the Congo	Central Africa			Clinical (Human)	Human	Clinical	2017
GCA_020172565.1	SAMN20306015	NA	PDT001138241.1	Democratic Republic of the Congo	SRR15192519	1.65388 S 29.22479 E	Democratic Republic of the Congo	Central Africa			Clinical (Human)	Human	Clinical	2017
GCA_020175555.1	SAMN20305997	NA	PDT001138238.1	Democratic Republic of the Congo	SRR15192516	1.621214 S 29.156623 E	Democratic Republic of the Congo	Central Africa			Clinical (Human)	Human	Clinical	2015
GCA_020175875.1	SAMN20306009	NA	PDT001138248.1	Democratic Republic of the Congo	SRR15192526	1.18805459 S 29.44591229 E	Democratic Republic of the Congo	Central Africa			Clinical (Human)	Human	Clinical	2017
GCA_020175895.1	SAMN20306000	NA	PDT001138235.1	Democratic Republic of the Congo	SRR15192513	1.621214 S 29.156623 E	Democratic Republic of the Congo	Central Africa			Clinical (Human)	Human	Clinical	2015
GCA_020175915.1	SAMN20306014	NA	PDT001138242.1	Democratic Republic of the Congo	SRR15192520	1.669374 S 29.232069 E	Democratic Republic of the Congo	Central Africa			Clinical (Human)	Human	Clinical	2017
GCA_020175935.1	SAMN20306016	NA	PDT001138240.1	Democratic Republic of the Congo	SRR15192518	1.65388 S 29.22479 E	Democratic Republic of the Congo	Central Africa			Clinical (Human)	Human	Clinical	2017
GCA_020175955.1	SAMN20306011	NA	PDT001138246.1	Democratic Republic of the Congo	SRR15192524	1.67886542 S 29.22441066 E	Democratic Republic of the Congo	Central Africa			Clinical (Human)	Human	Clinical	2017
GCA_020175995.1	SAMN20305999	NA	PDT001138236.1	Democratic Republic of the Congo	SRR15192514	1.621214 S 29.156623 E	Democratic Republic of the Congo	Central Africa			Clinical (Human)	Human	Clinical	2015
GCA_020176075.1	SAMN20305998	NA	PDT001138237.1	Democratic Republic of the Congo	SRR15192515	1.621214 S 29.156623 E	Democratic Republic of the Congo	Central Africa			Clinical (Human)	Human	Clinical	2015
GCA_020176195.1	SAMN20306004	NA	PDT001138253.1	Democratic Republic of the Congo	SRR15192531	0.3677631 S 29.190153 E	Democratic Republic of the Congo	Central Africa			Clinical (Human)	Human	Clinical	2016
GCA_020181315.1	SAMN20306003	NA	PDT001138232.1	Democratic Republic of the Congo	SRR15192510	1.677313 S 29.23635 E	Democratic Republic of the Congo	Central Africa			Clinical (Human)	Human	Clinical	2016
GCA_020181915.1	SAMN20305995	NA	PDT001138254.1	Democratic Republic of the Congo	SRR15192532	1.621214 S 29.156623 E	Democratic Republic of the Congo	Central Africa			Clinical (Human)	Human	Clinical	2015
GCA_020181935.1	SAMN20306008	NA	PDT001138249.1	Democratic Republic of the Congo	SRR15192527	1.18805459 S 29.44591229 E	Democratic Republic of the Congo	Central Africa			Clinical (Human)	Human	Clinical	2017
GCA_020182075.1	SAMN20306001	NA	PDT001138234.1	Democratic Republic of the Congo	SRR15192512	1.621214 S 29.156623 E	Democratic Republic of the Congo	Central Africa			Clinical (Human)	Human	Clinical	2015
GCA_020186095.1	SAMN20306007	NA	PDT001138250.1	Democratic Republic of the Congo	SRR15192528	1.546277 S 28.873122 E	Democratic Republic of the Congo	Central Africa			Clinical (Human)	Human	Clinical	2017
GCA_020214905.1	SAMN20305994	NA	PDT001138255.1	Democratic Republic of the Congo	SRR15192533	1.613051 S 29.03132 E	Democratic Republic of the Congo	Central Africa			Clinical (Human)	Human	Clinical	2015
GCA_024393815.1	SAMEA6614419	NA	PDT000797860.2	Tanzania	ERR3980557	NA	Tanzania	East Africa			Environmental (Water)	Aquatic/Environmental		2019
GCA_024393835.1	SAMEA6614421	NA	PDT000797861.2	Tanzania	ERR3980559	NA	Tanzania	East Africa			Environmental (Water)	Aquatic/Environmental		2019
GCA_024393855.1	SAMEA6614418	NA	PDT000797859.2	Tanzania	ERR3980556	NA	Tanzania	East Africa			Environmental (Water)	Aquatic/Environmental		2019
GCA_024393875.1	SAMEA6614417	NA	PDT000797858.2	Tanzania	ERR3980555	NA	Tanzania	East Africa			Environmental (Water)	Aquatic/Environmental		2018
GCA_024393895.1	SAMEA6614415	NA	PDT000797857.2	Tanzania	ERR3980553	NA	Tanzania	East Africa			Environmental (Water)	Aquatic/Environmental		2018
GCA_024393915.1	SAMEA6614414	NA	PDT000797856.2	Tanzania	ERR3980552	NA	Tanzania	East Africa			Environmental (Water)	Aquatic/Environmental		2018
GCA_026963555.1	SAMN27544087	non O1/O139	PDT001529846.1	Ghana	SRR18731130	5.8143 N 0.0747 E	Ghana	West Africa			Other/Unknown	Human	Clinical	2011
GCA_026963595.1	SAMN27544088	non O1/O139	PDT001529845.1	Ghana	SRR18731129	5.8143 N 0.0747 E	Ghana	West Africa			Other/Unknown	Human	Clinical	2011
GCA_026963795.1	SAMN27544089	non O1/O139	PDT001529844.1	Ghana	SRR18731128	5.8143 N 0.0747 E	Ghana	West Africa			Other/Unknown	Human	Clinical	2011
GCA_026963815.1	SAMN27544090	non-O1	PDT001529843.1	Ghana	SRR18731127	5.5328 N 0.2268 W	Ghana	West Africa			Environmental (Water)		Environmental	2020
GCA_026963835.1	SAMN27544057	non-O1	PDT001529842.1	Ghana	SRR18731126	5.5328 N 0.2268 W	Ghana	West Africa			Environmental (Water)		Environmental	2019
GCA_026963855.1	SAMN27544059	non-O1	PDT001529840.1	Ghana	SRR18731124	5.5328 N 0.2268 W	Ghana	West Africa			Environmental (Water)		Environmental	2019
GCA_026963875.1	SAMN27544058	non-O1	PDT001529841.1	Ghana	SRR18731125	5.5328 N 0.2268 W	Ghana	West Africa			Environmental (Water)		Environmental	2019
GCA_026963895.1	SAMN27544060	non-O1	PDT001529839.1	Ghana	SRR18731123	5.5328 N 0.2268 W	Ghana	West Africa			Environmental (Water)		Environmental	2020
GCA_026963915.1	SAMN27544062	non-O1	PDT001529837.1	Ghana	SRR18731121	5.5328 N 0.2268 W	Ghana	West Africa			Environmental (Water)		Environmental	2016
GCA_026963935.1	SAMN27544063	non-O1	PDT001529834.1	Ghana	SRR18731118	5.5328 N 0.2268 W	Ghana	West Africa			Environmental (Water)		Environmental	2016
GCA_026963955.1	SAMN27544064	non-O1	PDT001529833.1	Ghana	SRR18731117	5.5328 N 0.2268 W	Ghana	West Africa			Environmental (Water)		Environmental	2016
GCA_026963975.1	SAMN27544054	non-O1	PDT001529835.1	Ghana	SRR18731119	5.5328 N 0.2268 W	Ghana	West Africa			Environmental (Water)		Environmental	2019
GCA_026963995.1	SAMN27544065	non-O1	PDT001529832.1	Ghana	SRR18731116	5.5328 N 0.2268 W	Ghana	West Africa			Environmental (Water)		Environmental	2016
GCA_026964015.1	SAMN27544066	non-O1	PDT001529831.1	Ghana	SRR18731115	5.5328 N 0.2268 W	Ghana	West Africa			Environmental (Water)		Environmental	2016
GCA_026964035.1	SAMN27544068	non-O1	PDT001529829.1	Ghana	SRR18731113	5.5328 N 0.2268 W	Ghana	West Africa			Environmental (Water)		Environmental	2016
GCA_026964055.1	SAMN27544067	non-O1	PDT001529830.1	Ghana	SRR18731114	5.5328 N 0.2268 W	Ghana	West Africa			Environmental (Water)		Environmental	2016
GCA_026964075.1	SAMN27544070	non-O1	PDT001529827.1	Ghana	SRR18731111	5.5328 N 0.2268 W	Ghana	West Africa			Environmental (Water)		Environmental	2016
GCA_026964095.1	SAMN27544071	non-O1	PDT001529826.1	Ghana	SRR18731110	5.5328 N 0.2268 W	Ghana	West Africa			Environmental (Water)		Environmental	2016
GCA_026964115.1	SAMN27544069	non-O1	PDT001529828.1	Ghana	SRR18731112	5.5328 N 0.2268 W	Ghana	West Africa			Environmental (Water)		Environmental	2016
GCA_026964135.1	SAMN27544055	non-O1	PDT001529824.1	Ghana	SRR18731108	5.5328 N 0.2268 W	Ghana	West Africa			Environmental (Water)		Environmental	2019
GCA_026964155.1	SAMN27544072	non-O1	PDT001529825.1	Ghana	SRR18731109	5.5328 N 0.2268 W	Ghana	West Africa			Environmental (Water)		Environmental	2016
GCA_026964175.1	SAMN27544074	non-O1	PDT001529822.1	Ghana	SRR18731106	5.5328 N 0.2268 W	Ghana	West Africa			Environmental (Water)		Environmental	2016
GCA_026964195.1	SAMN27544073	non-O1	PDT001529823.1	Ghana	SRR18731107	5.5328 N 0.2268 W	Ghana	West Africa			Environmental (Water)		Environmental	2016
GCA_026964215.1	SAMN27544076	non-O1	PDT001529820.1	Ghana	SRR18731104	5.5328 N 0.2268 W	Ghana	West Africa			Environmental (Water)		Environmental	2016
GCA_026964235.1	SAMN27544080	non O1/O139	PDT001529817.1	Ghana	SRR18731101	5.8143 N 0.0747 E	Ghana	West Africa			Other/Unknown	Human	Clinical	2014
GCA_026964255.1	SAMN27544078	non O1/O139	PDT001529819.1	Ghana	SRR18731103	5.8143 N 0.0747 E	Ghana	West Africa			Other/Unknown	Human	Clinical	2010
GCA_026964275.1	SAMN27544079	non O1/O139	PDT001529818.1	Ghana	SRR18731102	5.8143 N 0.0747 E	Ghana	West Africa			Other/Unknown	Human	Clinical	2010
GCA_026964315.1	SAMN27544056	non-O1	PDT001529813.1	Ghana	SRR18731097	5.5328 N 0.2268 W	Ghana	West Africa			Environmental (Water)		Environmental	2019
GCA_026964335.1	SAMN27544083	non O1/O139	PDT001529814.1	Ghana	SRR18731098	5.8143 N 0.0747 E	Ghana	West Africa			Other/Unknown	Human	Clinical	2014
GCA_026964375.1	SAMN27544084	non O1/O139	PDT001529812.1	Ghana	SRR18731096	5.8143 N 0.0747 E	Ghana	West Africa			Other/Unknown	Human	Clinical	2014
GCA_026964875.1	SAMN27544061	non-O1	PDT001529838.1	Ghana	SRR18731122	5.5328 N 0.2268 W	Ghana	West Africa			Environmental (Water)		Environmental	2020
GCA_026964895.1	SAMN27544085	non O1/O139	PDT001529811.1	Ghana	SRR18731095	5.8143 N 0.0747 E	Ghana	West Africa			Other/Unknown	Human	Clinical	2014
GCA_026964915.1	SAMN27544086	non O1/O139	PDT001529810.1	Ghana	SRR18731094	5.8143 N 0.0747 E	Ghana	West Africa			Other/Unknown	Human	Clinical	2011
GCA_026964935.1	SAMN27544053	non-O1	PDT001529836.1	Ghana	SRR18731120	5.5328 N 0.2268 W	Ghana	West Africa			Environmental (Water)		Environmental	2019
GCA_026965135.1	SAMN27544075	non-O1	PDT001529821.1	Ghana	SRR18731105	5.5328 N 0.2268 W	Ghana	West Africa			Environmental (Water)		Environmental	2016
GCA_026965455.1	SAMN27544082	non O1/O139	PDT001529815.1	Ghana	SRR18731099	5.8143 N 0.0747 E	Ghana	West Africa			Other/Unknown	Human	Clinical	2014
GCA_027802095.1	SAMN24118985	ZTox	PDT001566769.1	Zambia	SRR17283078	NA	Zambia	East Africa			Other/Unknown	Human	Clinical	2020
GCA_027802345.1	SAMN14818993	strain ctma-1441	PDT001566752.1	Democratic Republic of the Congo: Mutwanga	SRR11669591	0.20 N 29.44 E	Democratic Republic of the Congo	Central Africa		Mutwanga	Clinical (Human)	Human	Clinical	2015
GCA_028885255.1	SAMEA112667509	OA02017387	PDT001646497.1	South Africa: Limpopo	ERR10913505	NA	South Africa	Southern Africa		Limpopo	Environmental (Water)			2020
GCA_028885295.1	SAMEA112667511	YA00208753	PDT001646498.1	South Africa: KwaZulu-Natal	ERR10913507	NA	South Africa	Southern Africa		KwaZulu-Natal	Clinical (Human)		Clinical	2020
GCA_028885355.1	SAMEA112667507	YA00224848	PDT001646496.1	South Africa: Western Cape	ERR10913503	NA	South Africa	Southern Africa		Western Cape	Food/Aquatic Animal			2020
GCA_028908775.1	SAMEA112667506	CF00214290	PDT001646432.1	South Africa: KwaZulu-Natal	ERR10913502	NA	South Africa	Southern Africa		KwaZulu-Natal	Environmental (Water)			2020
GCA_028908795.1	SAMEA112667504	YA00162972	PDT001646430.1	South Africa: Western Cape	ERR10913499	NA	South Africa	Southern Africa		Western Cape	Food/Aquatic Animal			2019
GCA_028908815.1	SAMEA112667505	OA01713966	PDT001646431.1	South Africa: Limpopo	ERR10913500	NA	South Africa	Southern Africa		Limpopo	Environmental (Water)			2019
GCA_028908855.1	SAMEA112667502	YA00222089	PDT001646428.1	South Africa: Western Cape	ERR10913497	NA	South Africa	Southern Africa		Western Cape	Food/Aquatic Animal			2020
GCA_028908895.1	SAMEA112667500	OA01832280	PDT001646426.1	South Africa: Limpopo	ERR10913495	NA	South Africa	Southern Africa		Limpopo	Environmental (Water)			2019
GCA_028908915.1	SAMEA112667499	YA00191489	PDT001646425.1	South Africa: North West	ERR10913494	NA	South Africa	Southern Africa		North West	Clinical (Human)		Clinical	2019
GCA_028908935.1	SAMEA112667498	OA01632632	PDT001646424.1	South Africa: Limpopo	ERR10913493	NA	South Africa	Southern Africa		Limpopo	Environmental (Water)			2019
GCA_028908955.1	SAMEA112667496	YA00169222	PDT001646422.1	South Africa: Western Cape	ERR10913491	NA	South Africa	Southern Africa		Western Cape	Environmental (Water)			2019
GCA_028908975.1	SAMEA112667495	YA00436893_	PDT001646421.1	South Africa: Gauteng	ERR10913490	NA	South Africa	Southern Africa		Gauteng	Clinical (Human)		Clinical	2023
GCA_028908995.1	SAMEA112667494	OA01832288	PDT001646420.1	South Africa: Limpopo	ERR10913489	NA	South Africa	Southern Africa		Limpopo	Environmental (Water)			2019
GCA_028909035.1	SAMEA112667491	YA00191717	PDT001646417.1	South Africa: Western Cape	ERR10913486	NA	South Africa	Southern Africa		Western Cape	Clinical (Human)		Clinical	2019
GCA_028909055.1	SAMEA112667489	YA00222090	PDT001646415.1	South Africa: Western Cape	ERR10913484	NA	South Africa	Southern Africa		Western Cape	Food/Aquatic Animal			2020
GCA_028909075.1	SAMEA112667488	YA00155149	PDT001646414.1	South Africa: Western Cape	ERR10913483	NA	South Africa	Southern Africa		Western Cape	Food/Aquatic Animal			2019
GCA_028909095.1	SAMEA112667486	YA00227500	PDT001646412.1	South Africa: KwaZulu-Natal	ERR10913481	NA	South Africa	Southern Africa		KwaZulu-Natal	Environmental (Water)			2020
GCA_028909115.1	SAMEA112667487	YA00222088	PDT001646413.1	South Africa: Western Cape	ERR10913482	NA	South Africa	Southern Africa		Western Cape	Food/Aquatic Animal			2020
GCA_028909135.1	SAMEA112667490	ED01922498	PDT001646416.1	South Africa: Eastern Cape	ERR10913485	NA	South Africa	Southern Africa		Eastern Cape	Clinical (Human)		Clinical	2019
GCA_028909155.1	SAMEA112667485	YA00224846	PDT001646411.1	South Africa: Western Cape	ERR10913480	NA	South Africa	Southern Africa		Western Cape	Food/Aquatic Animal			2020
GCA_028909175.1	SAMEA112667484	YA00227481	PDT001646410.1	South Africa: KwaZulu-Natal	ERR10913479	NA	South Africa	Southern Africa		KwaZulu-Natal	Environmental (Water)			2020
GCA_028909195.1	SAMEA112667483	YA00150653	PDT001646409.1	South Africa: Limpopo	ERR10913478	NA	South Africa	Southern Africa		Limpopo	Clinical (Human)		Clinical	2019
GCA_028909215.1	SAMEA112667481	YA00175562	PDT001646407.1	South Africa: Western Cape	ERR10913476	NA	South Africa	Southern Africa		Western Cape	Clinical (Human)		Clinical	2019
GCA_028909235.1	SAMEA112667480	OA01817442	PDT001646406.1	South Africa: Limpopo	ERR10913475	NA	South Africa	Southern Africa		Limpopo	Environmental (Water)			2020
GCA_028909255.1	SAMEA112667479	YA00227488	PDT001646405.1	South Africa: KwaZulu-Natal	ERR10913474	NA	South Africa	Southern Africa		KwaZulu-Natal	Environmental (Water)			2020
GCA_028909275.1	SAMEA112667369	YA00227493	PDT001646404.1	South Africa: KwaZulu-Natal	ERR10913439	NA	South Africa	Southern Africa		KwaZulu-Natal	Environmental (Water)			2020
GCA_028909295.1	SAMEA112667368	YA00222092	PDT001646403.1	South Africa: Western Cape	ERR10913435	NA	South Africa	Southern Africa		Western Cape	Food/Aquatic Animal			2020
GCA_028909895.1	SAMEA112667186	LD04947912_	PDT001646372.1	South Africa: Gauteng	ERR10913347	NA	South Africa	Southern Africa		Gauteng	Clinical (Human)		Clinical	2023
GCA_028923685.1	SAMEA112667513	OA01832281	PDT001649513.1	South Africa: Limpopo	ERR10913509	NA	South Africa	Southern Africa		Limpopo	Environmental (Water)			2019
GCA_031067465.1	SAMEA114295687	YA00471181	PDT001870407.1	South Africa	ERR11872821	NA	South Africa	Southern Africa			Clinical (Human)		Clinical	2023
GCA_031072545.1	SAMEA114295688	YA00471186	PDT001870486.1	South Africa	ERR11872822	NA	South Africa	Southern Africa			Clinical (Human)		Clinical	2023
GCA_031593935.1	SAMEA113558734	YA00466696	PDT001889046.1	South Africa: Free State	ERR11493402	NA	South Africa	Southern Africa		Free State	Clinical (Human)		Clinical	2023
GCA_031778725.1	SAMEA112958521	NMRL22110576_YA00451366	PDT001834260.2	Zimbabwe: Masvingo	ERR11268539	NA	Zimbabwe	East Africa		Masvingo	Clinical (Human)		Clinical	2022
GCA_031786295.1	SAMEA112897044	LD04952620	PDT001829657.2	South Africa: Gauteng	ERR11219413	NA	South Africa	Southern Africa		Gauteng	Clinical (Human)		Clinical	2023
GCA_031956605.1	SAMEA114006443	RC02051129	PDT001902360.1	South Africa	ERR11672941	NA	South Africa	Southern Africa			Clinical (Human)		Clinical	2023
GCA_031956625.1	SAMEA114006431	RC02050755	PDT001902358.1	South Africa	ERR11672929	NA	South Africa	Southern Africa			Clinical (Human)		Clinical	2023
GCA_031956645.1	SAMEA114006437	RC02050758	PDT001902359.1	South Africa	ERR11672935	NA	South Africa	Southern Africa			Clinical (Human)		Clinical	2023
GCA_031988765.1	SAMEA114006427	RC02050536	PDT001902357.1	South Africa	ERR11672925	NA	South Africa	Southern Africa			Clinical (Human)		Clinical	2023
GCA_031988925.1	SAMEA114006425	RC02050220	PDT001902326.1	South Africa	ERR11672923	NA	South Africa	Southern Africa			Clinical (Human)		Clinical	2023
GCA_031989025.1	SAMEA114006419	RC02050006	PDT001902324.1	South Africa	ERR11672917	NA	South Africa	Southern Africa			Clinical (Human)		Clinical	2023
GCA_031989045.1	SAMEA114006421	YA00469958	PDT001902325.1	South Africa	ERR11672919	NA	South Africa	Southern Africa			Clinical (Human)		Clinical	2023
GCA_031989065.1	SAMEA114006407	RC02050776	PDT001902322.1	South Africa	ERR11672905	NA	South Africa	Southern Africa			Clinical (Human)		Clinical	2023
GCA_031989125.1	SAMEA114006406	RC00872660	PDT001902321.1	South Africa	ERR11672904	NA	South Africa	Southern Africa			Clinical (Human)		Clinical	2023
GCA_031989165.1	SAMEA114006411	RC02048314	PDT001902323.1	South Africa	ERR11672909	NA	South Africa	Southern Africa			Clinical (Human)		Clinical	2023
GCA_031989185.1	SAMEA114006405	RC02050222	PDT001902320.1	South Africa	ERR11672903	NA	South Africa	Southern Africa			Clinical (Human)		Clinical	2023
GCA_031989245.1	SAMEA114006401	RC02050752	PDT001902318.1	South Africa	ERR11672899	NA	South Africa	Southern Africa			Clinical (Human)		Clinical	2023
GCA_031989265.1	SAMEA114006404	RC02050226	PDT001902319.1	South Africa	ERR11672902	NA	South Africa	Southern Africa			Clinical (Human)		Clinical	2023
GCA_031989305.1	SAMEA114006400	RC02050192	PDT001902317.1	South Africa	ERR11672898	NA	South Africa	Southern Africa			Clinical (Human)		Clinical	2023
GCA_031989345.1	SAMEA114006399	RC02050687	PDT001902316.1	South Africa	ERR11672897	NA	South Africa	Southern Africa			Clinical (Human)		Clinical	2023
GCA_032104125.1	SAMEA114009737	RC02052882	PDT001905264.1	South Africa	ERR11679364	NA	South Africa	Southern Africa			Clinical (Human)		Clinical	2023
GCA_032104165.1	SAMEA114009736	RC02053465	PDT001905263.1	South Africa	ERR11679363	NA	South Africa	Southern Africa			Clinical (Human)		Clinical	2023
GCA_032104185.1	SAMEA114009732	RC02052631	PDT001905261.1	South Africa	ERR11679359	NA	South Africa	Southern Africa			Clinical (Human)		Clinical	2023
GCA_032104205.1	SAMEA114009726	RC02052095	PDT001905257.1	South Africa	ERR11679353	NA	South Africa	Southern Africa			Clinical (Human)		Clinical	2023
GCA_032104305.1	SAMEA114009725	RG00873681	PDT001905256.1	South Africa	ERR11679352	NA	South Africa	Southern Africa			Clinical (Human)		Clinical	2023
GCA_032112005.1	SAMEA114009729	RC02051997	PDT001905259.1	South Africa	ERR11679356	NA	South Africa	Southern Africa			Clinical (Human)		Clinical	2023
GCA_032112125.1	SAMEA114009723	RG0873235	PDT001905254.1	South Africa	ERR11679350	NA	South Africa	Southern Africa			Clinical (Human)		Clinical	2023
GCA_032112165.1	SAMEA114009722	YA00468511	PDT001905253.1	South Africa	ERR11679349	NA	South Africa	Southern Africa			Clinical (Human)		Clinical	2023
GCA_032112205.1	SAMEA114009721	RG0873223	PDT001905252.1	South Africa	ERR11679348	NA	South Africa	Southern Africa			Clinical (Human)		Clinical	2023
GCA_032112225.1	SAMEA114009720	YA00468497	PDT001905251.1	South Africa	ERR11679347	NA	South Africa	Southern Africa			Clinical (Human)		Clinical	2023
GCA_032112285.1	SAMEA114009718	RG0873236	PDT001905249.1	South Africa	ERR11679345	NA	South Africa	Southern Africa			Clinical (Human)		Clinical	2023
GCA_032112355.1	SAMEA114009716	YA00468496	PDT001905247.1	South Africa	ERR11679343	NA	South Africa	Southern Africa			Clinical (Human)		Clinical	2023
GCA_032113395.1	SAMEA114009733	RC02052626	PDT001905262.1	South Africa	ERR11679360	NA	South Africa	Southern Africa			Clinical (Human)		Clinical	2023
GCA_032113455.1	SAMEA114009724	RC02052633	PDT001905255.1	South Africa	ERR11679351	NA	South Africa	Southern Africa			Clinical (Human)		Clinical	2023
GCA_032113755.1	SAMEA114009727	RC02051999	PDT001905258.1	South Africa	ERR11679354	NA	South Africa	Southern Africa			Clinical (Human)		Clinical	2023
GCA_032121015.1	SAMEA114009719	YA00468534	PDT001905250.1	South Africa	ERR11679346	NA	South Africa	Southern Africa			Clinical (Human)		Clinical	2023
GCA_032121035.1	SAMEA114009717	YA00468494	PDT001905248.1	South Africa	ERR11679344	NA	South Africa	Southern Africa			Clinical (Human)		Clinical	2023
GCA_032126115.1	SAMEA114009730	RC02052628	PDT001905260.1	South Africa	ERR11679357	NA	South Africa	Southern Africa			Clinical (Human)		Clinical	2023
GCA_032152555.1	SAMEA114245571	YA00470288	PDT001907672.1	South Africa	ERR11810285	NA	South Africa	Southern Africa			Clinical (Human)		Clinical	2023
GCA_032277825.1	SAMEA113558737	YA00467052	PDT001911110.1	South Africa: Gauteng	ERR11493405	NA	South Africa	Southern Africa		Gauteng	Clinical (Human)		Clinical	2023
GCA_032303015.1	SAMEA112958525	NMRL23020028_YA00451351	PDT001834264.1	Zimbabwe: Mashonaland West	ERR11268543	NA	Zimbabwe	East Africa		Mashonaland West	Clinical (Human)		Clinical	2023
GCA_032303115.1	SAMEA112958523	LD05011516	PDT001834262.1	South Africa: Gauteng	ERR11268541	NA	South Africa	Southern Africa		Gauteng	Clinical (Human)		Clinical	2023
GCA_032303155.1	SAMEA112958524	YA00453554	PDT001834263.1	South Africa: Gauteng	ERR11268542	NA	South Africa	Southern Africa		Gauteng	Clinical (Human)		Clinical	2023
GCA_032303175.1	SAMEA112958522	NMRL22120619_YA00451363	PDT001834261.1	Zimbabwe: Masvingo	ERR11268540	NA	Zimbabwe	East Africa		Masvingo	Clinical (Human)		Clinical	2022
GCA_032303195.1	SAMEA112958520	NMRL23020024_YA00451361	PDT001834259.1	Zimbabwe: Mashonaland West	ERR11268538	NA	Zimbabwe	East Africa		Mashonaland West	Clinical (Human)		Clinical	2023
GCA_032349885.1	SAMEA112897049	YA00436893	PDT001829662.1	South Africa: Gauteng	ERR11219418	NA	South Africa	Southern Africa		Gauteng	Clinical (Human)		Clinical	2023
GCA_032349935.1	SAMEA112897047	YA00444950	PDT001829660.1	South Africa: Gauteng	ERR11219416	NA	South Africa	Southern Africa		Gauteng	Clinical (Human)		Clinical	2023
GCA_032349995.1	SAMEA112897046	LD04967541	PDT001829659.1	South Africa: Gauteng	ERR11219415	NA	South Africa	Southern Africa		Gauteng	Clinical (Human)		Clinical	2023
GCA_032350015.1	SAMEA112897045	IK04586933	PDT001829658.1	South Africa: Gauteng	ERR11219414	NA	South Africa	Southern Africa		Gauteng	Clinical (Human)		Clinical	2023
GCA_032436595.1	SAMEA114009731	RC02052823	PDT001916461.1	South Africa	ERR11679358	NA	South Africa	Southern Africa			Clinical (Human)		Clinical	2023
GCA_032436615.1	SAMEA114009728	RC02052091	PDT001916460.1	South Africa	ERR11679355	NA	South Africa	Southern Africa			Clinical (Human)		Clinical	2023
GCA_032436635.1	SAMEA114009705	YA00469214	PDT001916459.1	South Africa	ERR11679332	NA	South Africa	Southern Africa			Clinical (Human)		Clinical	2023
GCA_032436655.1	SAMEA114009735	RC02053407	PDT001915620.1	South Africa	ERR11679362	NA	South Africa	Southern Africa			Clinical (Human)		Clinical	2023
GCA_032436695.1	SAMEA114009706	MA05841426	PDT001915619.1	South Africa	ERR11679333	NA	South Africa	Southern Africa			Clinical (Human)		Clinical	2023
GCA_032496785.1	SAMEA114006456	RC02052107	PDT001917789.1	South Africa	ERR11672954	NA	South Africa	Southern Africa			Clinical (Human)		Clinical	2023
GCA_032496805.1	SAMEA114006455	RC02052105	PDT001917788.1	South Africa	ERR11672953	NA	South Africa	Southern Africa			Clinical (Human)		Clinical	2023
GCA_032496825.1	SAMEA114006454	RG00873031	PDT001917787.1	South Africa	ERR11672952	NA	South Africa	Southern Africa			Clinical (Human)		Clinical	2023
GCA_032496845.1	SAMEA114006453	RC02052103	PDT001917786.1	South Africa	ERR11672951	NA	South Africa	Southern Africa			Clinical (Human)		Clinical	2023
GCA_032496865.1	SAMEA114006452	RC02051973	PDT001917785.1	South Africa	ERR11672950	NA	South Africa	Southern Africa			Clinical (Human)		Clinical	2023
GCA_032496905.1	SAMEA114006451	RC02051808	PDT001917784.1	South Africa	ERR11672949	NA	South Africa	Southern Africa			Clinical (Human)		Clinical	2023
GCA_032496925.1	SAMEA114006450	RC02051803	PDT001917783.1	South Africa	ERR11672948	NA	South Africa	Southern Africa			Clinical (Human)		Clinical	2023
GCA_032496945.1	SAMEA114006447	RC02051355	PDT001917780.1	South Africa	ERR11672945	NA	South Africa	Southern Africa			Clinical (Human)		Clinical	2023
GCA_032496965.1	SAMEA114006448	RC02051362	PDT001917781.1	South Africa	ERR11672946	NA	South Africa	Southern Africa			Clinical (Human)		Clinical	2023
GCA_032496985.1	SAMEA114006446	RC02051360	PDT001917779.1	South Africa	ERR11672944	NA	South Africa	Southern Africa			Clinical (Human)		Clinical	2023
GCA_032497005.1	SAMEA114006445	RC02051260	PDT001917778.1	South Africa	ERR11672943	NA	South Africa	Southern Africa			Clinical (Human)		Clinical	2023
GCA_032497025.1	SAMEA114006444	RC02051345	PDT001917777.1	South Africa	ERR11672942	NA	South Africa	Southern Africa			Clinical (Human)		Clinical	2023
GCA_032497045.1	SAMEA114006440	RC02050967	PDT001917774.1	South Africa	ERR11672938	NA	South Africa	Southern Africa			Clinical (Human)		Clinical	2023
GCA_032497065.1	SAMEA114006442	RC02051222	PDT001917776.1	South Africa	ERR11672940	NA	South Africa	Southern Africa			Clinical (Human)		Clinical	2023
GCA_032497085.1	SAMEA114006441	RC02050974	PDT001917775.1	South Africa	ERR11672939	NA	South Africa	Southern Africa			Clinical (Human)		Clinical	2023
GCA_032497105.1	SAMEA114006438	RC02051224	PDT001917773.1	South Africa	ERR11672936	NA	South Africa	Southern Africa			Clinical (Human)		Clinical	2023
GCA_032497125.1	SAMEA114006436	RC02050778	PDT001917772.1	South Africa	ERR11672934	NA	South Africa	Southern Africa			Clinical (Human)		Clinical	2023
GCA_032497145.1	SAMEA114006434	RC02050693	PDT001917770.1	South Africa	ERR11672932	NA	South Africa	Southern Africa			Clinical (Human)		Clinical	2023
GCA_032497165.1	SAMEA114006435	RC02050694	PDT001917771.1	South Africa	ERR11672933	NA	South Africa	Southern Africa			Clinical (Human)		Clinical	2023
GCA_032497185.1	SAMEA114006433	RC02050754	PDT001917769.1	South Africa	ERR11672931	NA	South Africa	Southern Africa			Clinical (Human)		Clinical	2023
GCA_032497225.1	SAMEA114006432	RC02050756	PDT001917768.1	South Africa	ERR11672930	NA	South Africa	Southern Africa			Clinical (Human)		Clinical	2023
GCA_032497245.1	SAMEA114006430	RC02050691	PDT001917767.1	South Africa	ERR11672928	NA	South Africa	Southern Africa			Clinical (Human)		Clinical	2023
GCA_032497265.1	SAMEA114006429	RC02050540	PDT001917766.1	South Africa	ERR11672927	NA	South Africa	Southern Africa			Clinical (Human)		Clinical	2023
GCA_032497285.1	SAMEA114006428	RC02050535	PDT001917765.1	South Africa	ERR11672926	NA	South Africa	Southern Africa			Clinical (Human)		Clinical	2023
GCA_032497305.1	SAMEA114006426	RC02050219	PDT001917764.1	South Africa	ERR11672924	NA	South Africa	Southern Africa			Clinical (Human)		Clinical	2023
GCA_032497325.1	SAMEA114006422	YA00470291	PDT001917761.1	South Africa	ERR11672920	NA	South Africa	Southern Africa			Clinical (Human)		Clinical	2023
GCA_032497345.1	SAMEA114006424	MA05838109	PDT001917763.1	South Africa	ERR11672922	NA	South Africa	Southern Africa			Clinical (Human)		Clinical	2023
GCA_032497365.1	SAMEA114006423	MA05837712	PDT001917762.1	South Africa	ERR11672921	NA	South Africa	Southern Africa			Clinical (Human)		Clinical	2023
GCA_032497385.1	SAMEA114006420	YA00470290	PDT001917760.1	South Africa	ERR11672918	NA	South Africa	Southern Africa			Clinical (Human)		Clinical	2023
GCA_032497405.1	SAMEA114006418	RC02050032	PDT001917759.1	South Africa	ERR11672916	NA	South Africa	Southern Africa			Clinical (Human)		Clinical	2023
GCA_032497425.1	SAMEA114006416	RC02050042	PDT001917757.1	South Africa	ERR11672914	NA	South Africa	Southern Africa			Clinical (Human)		Clinical	2023
GCA_032497445.1	SAMEA114006417	RC02050036	PDT001917758.1	South Africa	ERR11672915	NA	South Africa	Southern Africa			Clinical (Human)		Clinical	2023
GCA_032497465.1	SAMEA114006415	RC02050098	PDT001917756.1	South Africa	ERR11672913	NA	South Africa	Southern Africa			Clinical (Human)		Clinical	2023
GCA_032497485.1	SAMEA114006414	RC02049441	PDT001917755.1	South Africa	ERR11672912	NA	South Africa	Southern Africa			Clinical (Human)		Clinical	2023
GCA_032497505.1	SAMEA114006413	RC02050003	PDT001917754.1	South Africa	ERR11672911	NA	South Africa	Southern Africa			Clinical (Human)		Clinical	2023
GCA_032497525.1	SAMEA114006410	RC02049412	PDT001917753.1	South Africa	ERR11672908	NA	South Africa	Southern Africa			Clinical (Human)		Clinical	2023
GCA_032497545.1	SAMEA114006408	YA00467092	PDT001917751.1	South Africa	ERR11672906	NA	South Africa	Southern Africa			Clinical (Human)		Clinical	2023
GCA_032497565.1	SAMEA114006409	RC02050777	PDT001917752.1	South Africa	ERR11672907	NA	South Africa	Southern Africa			Clinical (Human)		Clinical	2023
GCA_032497585.1	SAMEA114006402	RC02050695	PDT001917749.1	South Africa	ERR11672900	NA	South Africa	Southern Africa			Clinical (Human)		Clinical	2023
GCA_032497605.1	SAMEA114006398	RC02050757	PDT001917748.1	South Africa	ERR11672896	NA	South Africa	Southern Africa			Clinical (Human)		Clinical	2023
GCA_032497625.1	SAMEA114006403	RC02050224	PDT001917750.1	South Africa	ERR11672901	NA	South Africa	Southern Africa			Clinical (Human)		Clinical	2023
GCA_032599485.1	SAMEA114466247	YA00471182	PDT001925850.1	South Africa	ERR12092794	NA	South Africa	Southern Africa			Clinical (Human)		Clinical	2023
GCA_032939995.1	SAMEA113558735	YA00466950	PDT001949293.1	South Africa: Gauteng	ERR11493403	NA	South Africa	Southern Africa		Gauteng	Clinical (Human)		Clinical	2023
GCA_032940015.1	SAMEA113558736	YA00466776	PDT001949294.1	South Africa: Gauteng	ERR11493404	NA	South Africa	Southern Africa		Gauteng	Clinical (Human)		Clinical	2023
GCA_033086015.1	SAMEA114006439	RC02050904	PDT001954359.1	South Africa	ERR11672937	NA	South Africa	Southern Africa			Clinical (Human)		Clinical	2023
GCA_033086035.1	SAMEA114006412	RC02049466	PDT001954358.1	South Africa	ERR11672910	NA	South Africa	Southern Africa			Clinical (Human)		Clinical	2023
GCA_033099225.1	SAMEA114526800	RC02116418	PDT001955284.1	South Africa	ERR12142669	NA	South Africa	Southern Africa			Clinical (Human)		Clinical	2023
GCA_033200915.1	SAMEA112897048	LD04947912	PDT001829661.2	South Africa: Gauteng	ERR11219417	NA	South Africa	Southern Africa		Gauteng	Clinical (Human)		Clinical	2023
GCA_034663235.1	SAMEA115059041	YA00501184	PDT002039979.1	South Africa	ERR12388502	NA	South Africa	Southern Africa			Clinical (Human)		Clinical	2023
GCA_038414385.1	SAMN41018405	PNUSAV005450	PDT002141924.1	Kenya	SRR28744445	NA	Kenya	East Africa			Clinical (Human)	Human	Clinical	2023
GCA_038429705.1	SAMN41018407	PNUSAV005449	PDT002141923.1	Kenya	SRR28744444	NA	Kenya	East Africa			Clinical (Human)	Human	Clinical	2022
GCA_040099025.1	SAMN41745123	PNUSAV005575	PDT002190437.1	Kenya	SRR29317991	NA	Kenya	East Africa					Clinical	2023
GCA_040099045.1	SAMN41745122	PNUSAV005579	PDT002190438.1	Kenya	SRR29317992	NA	Kenya	East Africa					Clinical	2023
GCA_040099065.1	SAMN41745119	PNUSAV005577	PDT002190440.1	Kenya	SRR29317994	NA	Kenya	East Africa					Clinical	2023
GCA_040099085.1	SAMN41745121	PNUSAV005581	PDT002190436.1	Kenya	SRR29317990	NA	Kenya	East Africa					Clinical	2023
GCA_040099105.1	SAMN41745120	PNUSAV005580	PDT002190433.1	Kenya	SRR29317987	NA	Kenya	East Africa					Clinical	2023
GCA_040099125.1	SAMN41745115	PNUSAV005582	PDT002190434.1	Kenya	SRR29317988	NA	Kenya	East Africa					Clinical	2022
GCA_040099265.1	SAMN41745117	PNUSAV005576	PDT002190435.1	Kenya	SRR29317989	NA	Kenya	East Africa					Clinical	2023
GCA_040099365.1	SAMN41745116	PNUSAV005578	PDT002190441.1	Kenya	SRR29317995	NA	Kenya	East Africa					Clinical	2023
GCA_040235595.1	SAMN41745118	PNUSAV005583	PDT002190432.1	Kenya	SRR29317986	NA	Kenya	East Africa					Clinical	2023
GCA_042767005.1	SAMEA115100436	23111227	PDT002055000.1	Zimbabwe	ERR12448418	NA	Zimbabwe	East Africa			Clinical (Human)		Clinical	2023
GCA_042767115.1	SAMEA115100433	23090839	PDT002054899.1	Zimbabwe	ERR12448415	NA	Zimbabwe	East Africa			Clinical (Human)		Clinical	2023
GCA_042767155.1	SAMEA115100435	23090818	PDT002054999.1	Zimbabwe	ERR12448417	NA	Zimbabwe	East Africa			Clinical (Human)		Clinical	2023
GCA_042806115.1	SAMEA115100438	23111178	PDT002054218.1	Zimbabwe	ERR12448420	NA	Zimbabwe	East Africa			Clinical (Human)		Clinical	2023
GCA_042808475.1	SAMEA115162350	OF00228501	PDT002071335.1	South Africa	ERR12543576	NA	South Africa	Southern Africa			Clinical (Human)		Clinical	2024
GCA_042808525.1	SAMEA115162352	YA00505918	PDT002071378.1	South Africa	ERR12543578	NA	South Africa	Southern Africa			Clinical (Human)		Clinical	2024
GCA_042812895.1	SAMEA115162351	NI00424620	PDT002071336.1	South Africa	ERR12543577	NA	South Africa	Southern Africa			Clinical (Human)		Clinical	2024
GCA_042837445.1	SAMEA115328529	OF00229036	PDT002087845.1	South Africa	ERR12669847	NA	South Africa	Southern Africa			Clinical (Human)		Clinical	2024
GCA_042837465.1	SAMEA115328528	OA02771270	PDT002087844.1	South Africa	ERR12669846	NA	South Africa	Southern Africa			Clinical (Human)		Clinical	2024
GCA_042845915.1	SAMEA115100432	23030102	PDT002054215.1	Zimbabwe	ERR12448414	NA	Zimbabwe	East Africa			Clinical (Human)		Clinical	2023
GCA_042849175.1	SAMEA115100434	23090836	PDT002054216.1	Zimbabwe	ERR12448416	NA	Zimbabwe	East Africa			Clinical (Human)		Clinical	2023
GCA_042853215.1	SAMEA115100437	23100993	PDT002054217.1	Zimbabwe	ERR12448419	NA	Zimbabwe	East Africa			Clinical (Human)		Clinical	2023
GCA_042947085.1	SAMN40623195	KEN/2009/007	PDT002123991.1	Kenya: Nairobi	SRR28466976	not collected	Kenya	East Africa		Nairobi	Clinical (Human)	Human	Clinical	2009
GCA_042947105.1	SAMN40623198	KEN/2009/125	PDT002123988.1	Kenya: Kilifi	SRR28466973	not collected	Kenya	East Africa		Kilifi	Clinical (Human)	Human	Clinical	2009
GCA_042947135.1	SAMN40623196	KEN/2010/043	PDT002123990.1	Kenya: Kiambu	SRR28466975	not collected	Kenya	East Africa		Kiambu	Clinical (Human)	Human	Clinical	2010
GCA_042947165.1	SAMN40623200	KEN/2010/034	PDT002123986.1	Kenya: West Pokot	SRR28466971	not collected	Kenya	East Africa		West Pokot	Clinical (Human)	Human	Clinical	2010
GCA_042947185.1	SAMN40623204	KEN/2009/098	PDT002123981.1	Kenya: Nairobi	SRR28466966	not collected	Kenya	East Africa		Nairobi	Clinical (Human)	Human	Clinical	2009
GCA_042947205.1	SAMN40623207	KEN/2010/055	PDT002123978.1	Kenya: Nairobi	SRR28466963	not collected	Kenya	East Africa		Nairobi	Clinical (Human)	Human	Clinical	2010
GCA_042947245.1	SAMN40623205	KEN/2010/045	PDT002123980.1	Kenya: Nairobi	SRR28466965	not collected	Kenya	East Africa		Nairobi	Clinical (Human)	Human	Clinical	2010
GCA_042947265.1	SAMN40623167	KEN/2010/017	PDT002123955.1	Kenya: West Pokot	SRR28466920	not collected	Kenya	East Africa		West Pokot	Clinical (Human)	Human	Clinical	2010
GCA_042947285.1	SAMN40623163	KEN/2011/003	PDT002123964.1	Kenya: Nairobi	SRR28466935	not collected	Kenya	East Africa		Nairobi	Clinical (Human)	Human	Clinical	2011
GCA_042947305.1	SAMN40623161	KEN/2013/001	PDT002123966.1	Kenya: Nairobi	SRR28466937	not collected	Kenya	East Africa		Nairobi	Clinical (Human)	Human	Clinical	2013
GCA_042947315.1	SAMN40623185	KEN/2009/084	PDT002123935.1	Kenya: Nairobi	SRR28466900	not collected	Kenya	East Africa		Nairobi	Clinical (Human)	Human	Clinical	2009
GCA_042947345.1	SAMN40623253	UGA/2018/010	PDT002123959.1	Uganda: Kyenjojo	SRR28466930	not collected	Uganda	East Africa		Kyenjojo	Clinical (Human)	Human	Clinical	2018
GCA_042947365.1	SAMN40623239	TZA/2018/177	PDT002123922.1	Tanzania: Kusini Unguja	SRR28466887	not collected	Tanzania	East Africa		Kusini Unguja	Clinical (Human)	Human	Clinical	2018
GCA_042947385.1	SAMN40623244	TZA/2015/001	PDT002123916.1	Tanzania: Kusini Unguja	SRR28466881	not collected	Tanzania	East Africa		Kusini Unguja	Clinical (Human)	Human	Clinical	2015
GCA_042947455.1	SAMN40623247	TZA/2017/009	PDT002123913.1	Tanzania: Dar es Salaam	SRR28466878	not collected	Tanzania	East Africa		Dar es Salaam	Clinical (Human)	Human	Clinical	2017
GCA_042947485.1	SAMN40623249	TZA/2017/003	PDT002123911.1	Tanzania: Pwani	SRR28466876	not collected	Tanzania	East Africa		Pwani	Clinical (Human)	Human	Clinical	2017
GCA_042947925.1	SAMN40623151	KEN/2008/007	PDT002124001.1	Kenya: Bungoma	SRR28466986	not collected	Kenya	East Africa		Bungoma	Clinical (Human)	Human	Clinical	2008
GCA_042947985.1	SAMN40623202	KEN/2009/142	PDT002123983.1	Kenya: Isiolo	SRR28466968	not collected	Kenya	East Africa		Isiolo	Clinical (Human)	Human	Clinical	2009
GCA_042948005.1	SAMN40623187	KEN/2009/135	PDT002124000.1	Kenya: Marsabit	SRR28466985	not collected	Kenya	East Africa		Marsabit	Clinical (Human)	Human	Clinical	2009
GCA_042948025.1	SAMN40623203	KEN/2009/015	PDT002123982.1	Kenya: Nairobi	SRR28466967	not collected	Kenya	East Africa		Nairobi	Clinical (Human)	Human	Clinical	2009
GCA_042948045.1	SAMN40623191	KEN/2007/005	PDT002123995.1	Kenya: Homa Bay	SRR28466980	not collected	Kenya	East Africa		Homa Bay	Clinical (Human)	Human	Clinical	2007
GCA_042948065.1	SAMN40623206	KEN/2010/014	PDT002123979.1	Kenya: West Pokot	SRR28466964	not collected	Kenya	East Africa		West Pokot	Clinical (Human)	Human	Clinical	2010
GCA_042948085.1	SAMN40623154	KEN/2009/078	PDT002123974.1	Kenya: Nairobi	SRR28466945	not collected	Kenya	East Africa		Nairobi	Clinical (Human)	Human	Clinical	2009
GCA_042948105.1	SAMN40623155	KEN/2010/006	PDT002123973.1	Kenya: Machakos	SRR28466944	not collected	Kenya	East Africa		Machakos	Clinical (Human)	Human	Clinical	2010
GCA_042948125.1	SAMN40623158	KEN/2009/100	PDT002123970.1	Kenya: Kiambu	SRR28466941	not collected	Kenya	East Africa		Kiambu	Clinical (Human)	Human	Clinical	2009
GCA_042948135.1	SAMN40623157	KEN/2009/101	PDT002123971.1	Kenya: Kiambu	SRR28466942	not collected	Kenya	East Africa		Kiambu	Clinical (Human)	Human	Clinical	2009
GCA_042948165.1	SAMN40623159	KEN/2009/013	PDT002123969.1	Kenya: West Pokot	SRR28466940	not collected	Kenya	East Africa		West Pokot	Clinical (Human)	Human	Clinical	2009
GCA_042948185.1	SAMN40623162	KEN/2011/004	PDT002123965.1	Kenya: Nairobi	SRR28466936	not collected	Kenya	East Africa		Nairobi	Clinical (Human)	Human	Clinical	2011
GCA_042948205.1	SAMN40623164	KEN/2009/046	PDT002123963.1	Kenya: Kiambu	SRR28466934	not collected	Kenya	East Africa		Kiambu	Clinical (Human)	Human	Clinical	2009
GCA_042948225.1	SAMN40623251	UGA/2018/026	PDT002123961.1	Uganda: Kampala	SRR28466932	not collected	Uganda	East Africa		Kampala	Clinical (Human)	Human	Clinical	2018
GCA_042948245.1	SAMN40623252	UGA/2018/006	PDT002123960.1	Uganda: Hoima	SRR28466931	not collected	Uganda	East Africa		Hoima	Clinical (Human)	Human	Clinical	2018
GCA_042948265.1	SAMN40623165	KEN/2008/001	PDT002123957.1	Kenya: Mandera	SRR28466922	not collected	Kenya	East Africa		Mandera	Clinical (Human)	Human	Clinical	2008
GCA_042948295.1	SAMN40623169	KEN/2009/103	PDT002123953.1	Kenya: Turkana	SRR28466918	not collected	Kenya	East Africa		Turkana	Clinical (Human)	Human	Clinical	2009
GCA_042948325.1	SAMN40623173	KEN/2009/134	PDT002123948.1	Kenya: Kisumu	SRR28466913	not collected	Kenya	East Africa		Kisumu	Clinical (Human)	Human	Clinical	2009
GCA_042948345.1	SAMN40623176	KEN/2007/008	PDT002123945.1	Kenya: West Pokot	SRR28466910	not collected	Kenya	East Africa		West Pokot	Clinical (Human)	Human	Clinical	2007
GCA_042948365.1	SAMN40623175	KEN/2007/006	PDT002123946.1	Kenya: Homa Bay	SRR28466911	not collected	Kenya	East Africa		Homa Bay	Clinical (Human)	Human	Clinical	2007
GCA_042948385.1	SAMN40623177	KEN/2010/016	PDT002123944.1	Kenya: West Pokot	SRR28466909	not collected	Kenya	East Africa		West Pokot	Clinical (Human)	Human	Clinical	2010
GCA_042948425.1	SAMN40623180	KEN/2015/033	PDT002123941.1	Kenya: Kiambu	SRR28466906	not collected	Kenya	East Africa		Kiambu	Clinical (Human)	Human	Clinical	2015
GCA_042948445.1	SAMN40623182	KEN/2009/043	PDT002123938.1	Kenya: Makueni	SRR28466903	not collected	Kenya	East Africa		Makueni	Clinical (Human)	Human	Clinical	2009
GCA_042948465.1	SAMN40623183	KEN/2010/013	PDT002123937.1	Kenya: Makueni	SRR28466902	not collected	Kenya	East Africa		Makueni	Clinical (Human)	Human	Clinical	2010
GCA_042948485.1	SAMN40623229	TZA/2018/041	PDT002123933.1	Tanzania: Arusha	SRR28466898	not collected	Tanzania	East Africa		Arusha	Clinical (Human)	Human	Clinical	2018
GCA_042948505.1	SAMN40623232	TZA/2018/069	PDT002123929.1	Tanzania: Kigoma	SRR28466894	not collected	Tanzania	East Africa		Kigoma	Clinical (Human)	Human	Clinical	2018
GCA_042948525.1	SAMN40623237	TZA/2018/027	PDT002123924.1	Tanzania: Arusha	SRR28466889	not collected	Tanzania	East Africa		Arusha	Clinical (Human)	Human	Clinical	2018
GCA_042948545.1	SAMN40623238	TZA/2018/038	PDT002123923.1	Tanzania: Arusha	SRR28466888	not collected	Tanzania	East Africa		Arusha	Clinical (Human)	Human	Clinical	2018
GCA_042948565.1	SAMN40623235	TZA/2018/066	PDT002123926.1	Tanzania: Arusha	SRR28466891	not collected	Tanzania	East Africa		Arusha	Clinical (Human)	Human	Clinical	2018
GCA_042948585.1	SAMN40623240	TZA/2018/178	PDT002123921.1	Tanzania: Kusini Unguja	SRR28466886	not collected	Tanzania	East Africa		Kusini Unguja	Clinical (Human)	Human	Clinical	2018
GCA_042948605.1	SAMN40623242	TZA/2018/181	PDT002123918.1	Tanzania: Kusini Unguja	SRR28466883	not collected	Tanzania	East Africa		Kusini Unguja	Clinical (Human)	Human	Clinical	2018
GCA_042948645.1	SAMN40623243	TZA/2015/002	PDT002123917.1	Tanzania: Kusini Unguja	SRR28466882	not collected	Tanzania	East Africa		Kusini Unguja	Clinical (Human)	Human	Clinical	2015
GCA_042948755.1	SAMN40623250	UGA/2018/009	PDT002123910.1	Uganda: Kyenjojo	SRR28466875	not collected	Uganda	East Africa		Kyenjojo	Clinical (Human)	Human	Clinical	2018
GCA_042949345.1	SAMN40623143	KEN/2009/097	PDT002123967.1	Kenya: Nairobi	SRR28466938	not collected	Kenya	East Africa		Nairobi	Clinical (Human)	Human	Clinical	2009
GCA_042949365.1	SAMN40623199	KEN/2010/038	PDT002123987.1	Kenya: Nairobi	SRR28466972	not collected	Kenya	East Africa		Nairobi	Clinical (Human)	Human	Clinical	2010
GCA_042949375.1	SAMN40623150	KEN/2008/006	PDT002123962.1	Kenya: Bungoma	SRR28466933	not collected	Kenya	East Africa		Bungoma	Clinical (Human)	Human	Clinical	2008
GCA_042949415.1	SAMN40623156	KEN/2009/077	PDT002123972.1	Kenya: Nairobi	SRR28466943	not collected	Kenya	East Africa		Nairobi	Clinical (Human)	Human	Clinical	2009
GCA_042949445.1	SAMN40623174	KEN/2008/002	PDT002123947.1	Kenya: Bungoma	SRR28466912	not collected	Kenya	East Africa		Bungoma	Clinical (Human)	Human	Clinical	2008
GCA_042949465.1	SAMN40623178	KEN/2008/005	PDT002123943.1	Kenya: Bungoma	SRR28466908	not collected	Kenya	East Africa		Bungoma	Clinical (Human)	Human	Clinical	2008
GCA_042949485.1	SAMN40623184	KEN/2009/061	PDT002123936.1	Kenya: Kwale	SRR28466901	not collected	Kenya	East Africa		Kwale	Clinical (Human)	Human	Clinical	2009
GCA_042949545.1	SAMN40623233	TZA/2018/024	PDT002123928.1	Tanzania: Arusha	SRR28466893	not collected	Tanzania	East Africa		Arusha	Clinical (Human)	Human	Clinical	2018
GCA_042949615.1	SAMN40623234	TZA/2018/068	PDT002123927.1	Tanzania: Kigoma	SRR28466892	not collected	Tanzania	East Africa		Kigoma	Clinical (Human)	Human	Clinical	2018
GCA_042952225.1	SAMN40623192	KEN/2009/035	PDT002123994.1	Kenya: Siaya	SRR28466979	not collected	Kenya	East Africa		Siaya	Clinical (Human)	Human	Clinical	2009
GCA_042952285.1	SAMN40623197	KEN/2009/092	PDT002123989.1	Kenya: Turkana	SRR28466974	not collected	Kenya	East Africa		Turkana	Clinical (Human)	Human	Clinical	2009
GCA_042969735.1	SAMN40623189	KEN/2009/055	PDT002123998.1	Kenya: Kwale	SRR28466983	not collected	Kenya	East Africa		Kwale	Clinical (Human)	Human	Clinical	2009
GCA_043524235.1	SAMEA115480823	NIM0008493	PDT002338475.1	South Africa	ERR12865430	NA	South Africa	Southern Africa			Clinical (Human)		Clinical	2024
GCA_043636405.1	SAMEA115480824	NI00429082	PDT002300755.1	South Africa	ERR12865431	NA	South Africa	Southern Africa			Clinical (Human)		Clinical	2024
GCA_044059495.1	SAMEA115499231	NIM0008210	PDT002326808.1	South Africa	ERR12931163	NA	South Africa	Southern Africa			Clinical (Human)		Clinical	2024
GCA_044400045.1	SAMEA115530211	YA00521860	PDT002303223.1	South Africa	ERR12982822	NA	South Africa	Southern Africa			Clinical (Human)		Clinical	2024
GCA_044411385.1	SAMEA115480825	NI00429522	PDT002300756.1	South Africa	ERR12865432	NA	South Africa	Southern Africa			Clinical (Human)		Clinical	2024
GCA_044974545.1	SAMEA115343818	YA00468826	PDT002089823.1	South Africa	ERR12687773	NA	South Africa	Southern Africa			Clinical (Human)		Clinical	2023
GCA_045017415.1	SAMEA112667493	OA01832296	PDT001646419.1	South Africa: Limpopo	ERR10913488	NA	South Africa	Southern Africa		Limpopo	Environmental (Water)			2019
GCA_045017425.1	SAMEA112667508	OA02024540	PDT001646433.1	South Africa: Limpopo	ERR10913504	NA	South Africa	Southern Africa		Limpopo	Environmental (Water)			2020
GCA_045017455.1	SAMEA112667510	OA01842978	PDT001646434.1	South Africa: Limpopo	ERR10913506	NA	South Africa	Southern Africa		Limpopo	Environmental (Water)			2020
GCA_045017475.1	SAMEA112667497	HM00176690	PDT001646423.1	South Africa: Gauteng	ERR10913492	NA	South Africa	Southern Africa		Gauteng	Environmental (Water)			2020
GCA_045017495.1	SAMEA112667482	HM00176691	PDT001646408.1	South Africa: Gauteng	ERR10913477	NA	South Africa	Southern Africa		Gauteng	Environmental (Water)			2020
GCA_045018675.1	SAMEA5559736	NA	PDT000793559.1	Democratic Republic of the Congo	ERR3269068	NA	Democratic Republic of the Congo	Central Africa				Human	Clinical	2015
GCA_045199725.1	SAMEA115415189	OF00231608	PDT002284008.1	South Africa	ERR12747796	NA	South Africa	Southern Africa			Clinical (Human)		Clinical	2024
GCA_045199945.1	SAMEA115415188	OA02784989	PDT002283801.1	South Africa	ERR12747795	NA	South Africa	Southern Africa			Clinical (Human)		Clinical	2024
GCA_045206835.1	SAMN35220761	NA	PDT002210027.1	Malawi: Dedza	SRR24673478	14.3817 S 34.3255 E	Malawi	East Africa		Dedza	Clinical (Human)	Human	Clinical	2022
GCA_045206955.1	SAMN35220776	NA	PDT002210011.1	Malawi:Lilongwe	SRR24673462	13.9626 S 33.7741 E	Malawi	East Africa		Lilongwe	Clinical (Human)	Human	Clinical	2022
GCA_045206975.1	SAMN35220780	NA	PDT002210007.1	Malawi:Lilongwe	SRR24673458	13.9626 S 33.7741 E	Malawi	East Africa		Lilongwe	Clinical (Human)	Human	Clinical	2022
GCA_045207045.1	SAMN35220784	NA	PDT002210002.1	Malawi:Dowa	SRR24673453	13.6515 S 33.9360 E	Malawi	East Africa		Dowa	Clinical (Human)	Human	Clinical	2022
GCA_045207095.1	SAMN35220755	NA	PDT002209995.1	Malawi:Salima	SRR24673446	13.7796 S 34.4586 E	Malawi	East Africa		Salima	Clinical (Human)	Human	Clinical	2022
GCA_045207115.1	SAMN35220794	NA	PDT002209991.1	Malawi:Lilongwe	SRR24673442	13.9626 S 33.7741 E	Malawi	East Africa		Lilongwe	Clinical (Human)	Human	Clinical	2023
GCA_046631645.1	SAMN43792784	NA	PDT002565514.1	Democratic Republic of the Congo: Nord-Kivu	SRR31411868	not collected	Democratic Republic of the Congo	Central Africa		Nord-Kivu	Clinical (Human)	Human	Clinical	2022
GCA_046631685.1	SAMN43792919	NA	PDT002565509.1	Democratic Republic of the Congo: Nord-Kivu	SRR31411863	not collected	Democratic Republic of the Congo	Central Africa		Nord-Kivu	Clinical (Human)	Human	Clinical	2022
GCA_046631705.1	SAMN43792951	NA	PDT002565502.1	Democratic Republic of the Congo: Sud-Kivu	SRR31411856	not collected	Democratic Republic of the Congo	Central Africa		Sud-Kivu	Clinical (Human)	Human	Clinical	2023
GCA_046631725.1	SAMN43792956	NA	PDT002565497.1	Democratic Republic of the Congo: Sud-Kivu	SRR31411851	not collected	Democratic Republic of the Congo	Central Africa		Sud-Kivu	Clinical (Human)	Human	Clinical	2022
GCA_046631745.1	SAMN43792950	NA	PDT002565504.1	Democratic Republic of the Congo: Sud-Kivu	SRR31411858	not collected	Democratic Republic of the Congo	Central Africa		Sud-Kivu	Clinical (Human)	Human	Clinical	2022
GCA_046631765.1	SAMN43792959	NA	PDT002565494.1	Democratic Republic of the Congo: Sud-Kivu	SRR31411848	not collected	Democratic Republic of the Congo	Central Africa		Sud-Kivu	Clinical (Human)	Human	Clinical	2023
GCA_046631785.1	SAMN43792983	NA	PDT002565492.1	Democratic Republic of the Congo: Haut-Katanga	SRR31411846	not collected	Democratic Republic of the Congo	Central Africa		Haut-Katanga	Clinical (Human)	Human	Clinical	2024
GCA_046631805.1	SAMN43792794	NA	PDT002565477.1	Democratic Republic of the Congo: Nord-Kivu	SRR31411831	not collected	Democratic Republic of the Congo	Central Africa		Nord-Kivu	Clinical (Human)	Human	Clinical	2023
GCA_046631825.1	SAMN43792805	NA	PDT002565469.1	Democratic Republic of the Congo: Haut-Lomami	SRR31411823	not collected	Democratic Republic of the Congo	Central Africa		Haut-Lomami	Clinical (Human)	Human	Clinical	2022
GCA_046631845.1	SAMN43792800	NA	PDT002565472.1	Democratic Republic of the Congo: Haut-Lomami	SRR31411826	not collected	Democratic Republic of the Congo	Central Africa		Haut-Lomami	Clinical (Human)	Human	Clinical	2022
GCA_046631865.1	SAMN43792988	NA	PDT002565487.1	Democratic Republic of the Congo: Haut-Lomami	SRR31411841	not collected	Democratic Republic of the Congo	Central Africa		Haut-Lomami	Clinical (Human)	Human	Clinical	2024
GCA_046631885.1	SAMN43792786	NA	PDT002565462.1	Democratic Republic of the Congo: Nord-Kivu	SRR31411816	not collected	Democratic Republic of the Congo	Central Africa		Nord-Kivu	Clinical (Human)	Human	Clinical	2022
GCA_046631905.1	SAMN43792881	NA	PDT002565464.1	Democratic Republic of the Congo: Nord-Kivu	SRR31411818	not collected	Democratic Republic of the Congo	Central Africa		Nord-Kivu	Clinical (Human)	Human	Clinical	2023
GCA_046631925.1	SAMN43792968	NA	PDT002565454.1	Democratic Republic of the Congo: Sud-Kivu	SRR31411808	not collected	Democratic Republic of the Congo	Central Africa		Sud-Kivu	Clinical (Human)	Human	Clinical	2023
GCA_046631945.1	SAMN43792963	NA	PDT002565459.1	Democratic Republic of the Congo: Sud-Kivu	SRR31411813	not collected	Democratic Republic of the Congo	Central Africa		Sud-Kivu	Clinical (Human)	Human	Clinical	2022
GCA_046631965.1	SAMN43792970	NA	PDT002565452.1	Democratic Republic of the Congo: Sud-Kivu	SRR31411806	not collected	Democratic Republic of the Congo	Central Africa		Sud-Kivu	Clinical (Human)	Human	Clinical	2023
GCA_046631985.1	SAMN43792965	NA	PDT002565457.1	Democratic Republic of the Congo: Sud-Kivu	SRR31411811	not collected	Democratic Republic of the Congo	Central Africa		Sud-Kivu	Clinical (Human)	Human	Clinical	2022
GCA_046632005.1	SAMN43792971	NA	PDT002565450.1	Democratic Republic of the Congo: Sud-Kivu	SRR31411804	not collected	Democratic Republic of the Congo	Central Africa		Sud-Kivu	Clinical (Human)	Human	Clinical	2023
GCA_046632025.1	SAMN43792972	NA	PDT002565449.1	Democratic Republic of the Congo: Sud-Kivu	SRR31411803	not collected	Democratic Republic of the Congo	Central Africa		Sud-Kivu	Clinical (Human)	Human	Clinical	2023
GCA_046632045.1	SAMN43792974	NA	PDT002565447.1	Democratic Republic of the Congo: Sud-Kivu	SRR31411801	not collected	Democratic Republic of the Congo	Central Africa		Sud-Kivu	Clinical (Human)	Human	Clinical	2023
GCA_046632065.1	SAMN43792976	NA	PDT002565445.1	Democratic Republic of the Congo: Sud-Kivu	SRR31411799	not collected	Democratic Republic of the Congo	Central Africa		Sud-Kivu	Clinical (Human)	Human	Clinical	2023
GCA_046632085.1	SAMN43792979	NA	PDT002565442.1	Democratic Republic of the Congo: Haut-Lomami	SRR31411796	not collected	Democratic Republic of the Congo	Central Africa		Haut-Lomami	Clinical (Human)	Human	Clinical	2024
GCA_046632095.1	SAMN43792788	NA	PDT002565440.1	Democratic Republic of the Congo: Nord-Kivu	SRR31411794	not collected	Democratic Republic of the Congo	Central Africa		Nord-Kivu	Clinical (Human)	Human	Clinical	2023
GCA_046632125.1	SAMN43792782	NA	PDT002565430.1	Democratic Republic of the Congo: Nord-Kivu	SRR31411784	not collected	Democratic Republic of the Congo	Central Africa		Nord-Kivu	Clinical (Human)	Human	Clinical	2022
GCA_046632145.1	SAMN43792867	NA	PDT002565424.1	Democratic Republic of the Congo: Nord-Kivu	SRR31411778	not collected	Democratic Republic of the Congo	Central Africa		Nord-Kivu	Clinical (Human)	Human	Clinical	2024
GCA_046632165.1	SAMN43792871	NA	PDT002565420.1	Democratic Republic of the Congo: Nord-Kivu	SRR31411774	not collected	Democratic Republic of the Congo	Central Africa		Nord-Kivu	Clinical (Human)	Human	Clinical	2024
GCA_046632185.1	SAMN43792873	NA	PDT002565417.1	Democratic Republic of the Congo: Nord-Kivu	SRR31411771	not collected	Democratic Republic of the Congo	Central Africa		Nord-Kivu	Clinical (Human)	Human	Clinical	2024
GCA_046632205.1	SAMN43792807	NA	PDT002565412.1	Democratic Republic of the Congo: Haut-Lomami	SRR31411766	not collected	Democratic Republic of the Congo	Central Africa		Haut-Lomami	Clinical (Human)	Human	Clinical	2022
GCA_046632225.1	SAMN43792806	NA	PDT002565414.1	Democratic Republic of the Congo: Haut-Lomami	SRR31411768	not collected	Democratic Republic of the Congo	Central Africa		Haut-Lomami	Clinical (Human)	Human	Clinical	2022
GCA_046632245.1	SAMN43792811	NA	PDT002565410.1	Democratic Republic of the Congo: Haut-Lomami	SRR31411764	not collected	Democratic Republic of the Congo	Central Africa		Haut-Lomami	Clinical (Human)	Human	Clinical	2023
GCA_046632265.1	SAMN43792812	NA	PDT002565409.1	Democratic Republic of the Congo: Nord-Kivu	SRR31411763	not collected	Democratic Republic of the Congo	Central Africa		Nord-Kivu	Clinical (Human)	Human	Clinical	2023
GCA_046632285.1	SAMN43792778	NA	PDT002565402.1	Democratic Republic of the Congo: Nord-Kivu	SRR31411756	not collected	Democratic Republic of the Congo	Central Africa		Nord-Kivu	Clinical (Human)	Human	Clinical	2023
GCA_046632305.1	SAMN43792825	NA	PDT002565397.1	Democratic Republic of the Congo: Nord-Kivu	SRR31411751	not collected	Democratic Republic of the Congo	Central Africa		Nord-Kivu	Clinical (Human)	Human	Clinical	2022
GCA_046632325.1	SAMN43792820	NA	PDT002565400.1	Democratic Republic of the Congo: Nord-Kivu	SRR31411754	not collected	Democratic Republic of the Congo	Central Africa		Nord-Kivu	Clinical (Human)	Human	Clinical	2023
GCA_046632335.1	SAMN43792821	NA	PDT002565399.1	Democratic Republic of the Congo: Nord-Kivu	SRR31411753	not collected	Democratic Republic of the Congo	Central Africa		Nord-Kivu	Clinical (Human)	Human	Clinical	2022
GCA_046632365.1	SAMN43792828	NA	PDT002565394.1	Democratic Republic of the Congo: Nord-Kivu	SRR31411748	not collected	Democratic Republic of the Congo	Central Africa		Nord-Kivu	Clinical (Human)	Human	Clinical	2022
GCA_046632385.1	SAMN43792836	NA	PDT002565385.1	Democratic Republic of the Congo: Nord-Kivu	SRR31411739	not collected	Democratic Republic of the Congo	Central Africa		Nord-Kivu	Clinical (Human)	Human	Clinical	2023
GCA_046632405.1	SAMN43792780	NA	PDT002565380.1	Democratic Republic of the Congo: Nord-Kivu	SRR31411734	not collected	Democratic Republic of the Congo	Central Africa		Nord-Kivu	Clinical (Human)	Human	Clinical	2023
GCA_046632425.1	SAMN43792839	NA	PDT002565382.1	Democratic Republic of the Congo: Nord-Kivu	SRR31411736	not collected	Democratic Republic of the Congo	Central Africa		Nord-Kivu	Clinical (Human)	Human	Clinical	2023
GCA_046632445.1	SAMN43792849	NA	PDT002565372.1	Democratic Republic of the Congo: Sud-Kivu	SRR31411726	not collected	Democratic Republic of the Congo	Central Africa		Sud-Kivu	Clinical (Human)	Human	Clinical	2022
GCA_046632465.1	SAMN44369197	NA	PDT002565198.1	Zambia: Northern	SRR31063595	not collected	Zambia	East Africa		Northern	Clinical (Human)	Human	Clinical	2023
GCA_046632485.1	SAMN44369218	NA	PDT002565360.1	Zambia: Northern	SRR31063757	not collected	Zambia	East Africa		Northern	Clinical (Human)	Human	Clinical	2023
GCA_046632505.1	SAMN44369202	NA	PDT002565193.1	Zambia: Luapula	SRR31063590	not collected	Zambia	East Africa		Luapula	Clinical (Human)	Human	Clinical	2023
GCA_046632525.1	SAMN43684701	NA	PDT002565131.1	Mozambique: Cabo Delgado	SRR31002849	not collected	Mozambique	East Africa		Cabo Delgado	Clinical (Human)	Human	Clinical	2023
GCA_046632545.1	SAMN43684720	NA	PDT002565121.1	Mozambique: Maputo City	SRR31002839	not collected	Mozambique	East Africa		Maputo City	Clinical (Human)	Human	Clinical	2023
GCA_046632565.1	SAMN43684731	NA	PDT002565108.1	Mozambique: Nampula	SRR31002826	not collected	Mozambique	East Africa		Nampula	Clinical (Human)	Human	Clinical	2023
GCA_046632585.1	SAMN43684727	NA	PDT002565113.1	Mozambique: Zambezia	SRR31002831	not collected	Mozambique	East Africa		Zambezia	Clinical (Human)	Human	Clinical	2023
GCA_046632605.1	SAMN43684707	NA	PDT002565103.1	Mozambique: Nampula	SRR31002821	not collected	Mozambique	East Africa		Nampula	Clinical (Human)	Human	Clinical	2023
GCA_046632625.1	SAMN43963856	NA	PDT002565096.1	Nigeria: Adamawa	SRR30823486	not collected	Nigeria	West Africa		Adamawa	Clinical (Human)	Human	Clinical	2018
GCA_046632645.1	SAMN43792774	NA	PDT002565516.1	Democratic Republic of the Congo: Nord-Kivu	SRR31411870	not collected	Democratic Republic of the Congo	Central Africa		Nord-Kivu	Clinical (Human)	Human	Clinical	2022
GCA_046632665.1	SAMN43792958	NA	PDT002565495.1	Democratic Republic of the Congo: Sud-Kivu	SRR31411849	not collected	Democratic Republic of the Congo	Central Africa		Sud-Kivu	Clinical (Human)	Human	Clinical	2023
GCA_046632685.1	SAMN43684733	NA	PDT002565106.1	Mozambique: Nampula	SRR31002824	not collected	Mozambique	East Africa		Nampula	Clinical (Human)	Human	Clinical	2023
GCA_046632705.1	SAMN43792792	NA	PDT002565480.1	Democratic Republic of the Congo: Nord-Kivu	SRR31411834	not collected	Democratic Republic of the Congo	Central Africa		Nord-Kivu	Clinical (Human)	Human	Clinical	2023
GCA_046632725.1	SAMN43792797	NA	PDT002565474.1	Democratic Republic of the Congo: Haut-Lomami	SRR31411828	not collected	Democratic Republic of the Congo	Central Africa		Haut-Lomami	Clinical (Human)	Human	Clinical	2023
GCA_046632745.1	SAMN43792880	NA	PDT002565465.1	Democratic Republic of the Congo: Nord-Kivu	SRR31411819	not collected	Democratic Republic of the Congo	Central Africa		Nord-Kivu	Clinical (Human)	Human	Clinical	2023
GCA_046632765.1	SAMN43792964	NA	PDT002565458.1	Democratic Republic of the Congo: Sud-Kivu	SRR31411812	not collected	Democratic Republic of the Congo	Central Africa		Sud-Kivu	Clinical (Human)	Human	Clinical	2021
GCA_046632785.1	SAMN43792860	NA	PDT002565432.1	Democratic Republic of the Congo: Sud-Kivu	SRR31411786	not collected	Democratic Republic of the Congo	Central Africa		Sud-Kivu	Clinical (Human)	Human	Clinical	2021
GCA_046632805.1	SAMN43792866	NA	PDT002565425.1	Democratic Republic of the Congo: Sud-Kivu	SRR31411779	not collected	Democratic Republic of the Congo	Central Africa		Sud-Kivu	Clinical (Human)	Human	Clinical	2021
GCA_046632825.1	SAMN43792875	NA	PDT002565415.1	Democratic Republic of the Congo: Nord-Kivu	SRR31411769	not collected	Democratic Republic of the Congo	Central Africa		Nord-Kivu	Clinical (Human)	Human	Clinical	2024
GCA_046632845.1	SAMN43792813	NA	PDT002565408.1	Democratic Republic of the Congo: Nord-Kivu	SRR31411762	not collected	Democratic Republic of the Congo	Central Africa		Nord-Kivu	Clinical (Human)	Human	Clinical	2023
GCA_046632865.1	SAMN43792818	NA	PDT002565403.1	Democratic Republic of the Congo: Nord-Kivu	SRR31411757	not collected	Democratic Republic of the Congo	Central Africa		Nord-Kivu	Clinical (Human)	Human	Clinical	2023
GCA_046632885.1	SAMN43792817	NA	PDT002565404.1	Democratic Republic of the Congo: Nord-Kivu	SRR31411758	not collected	Democratic Republic of the Congo	Central Africa		Nord-Kivu	Clinical (Human)	Human	Clinical	2023
GCA_046632905.1	SAMN43792831	NA	PDT002565390.1	Democratic Republic of the Congo: Nord-Kivu	SRR31411744	not collected	Democratic Republic of the Congo	Central Africa		Nord-Kivu	Clinical (Human)	Human	Clinical	2022
GCA_046632925.1	SAMN43792814	NA	PDT002565407.1	Democratic Republic of the Congo: Nord-Kivu	SRR31411761	not collected	Democratic Republic of the Congo	Central Africa		Nord-Kivu	Clinical (Human)	Human	Clinical	2023
GCA_046632945.1	SAMN43684709	NA	PDT002565101.1	Mozambique: Nampula	SRR31002819	not collected	Mozambique	East Africa		Nampula	Clinical (Human)	Human	Clinical	2023
GCA_046632965.1	SAMN44369232	NA	PDT002565345.1	Zambia: Northern	SRR31063742	not collected	Zambia	East Africa		Northern	Clinical (Human)	Human	Clinical	2023
GCA_046632975.1	SAMN44369156	NA	PDT002565315.1	Zambia: Central	SRR31063712	not collected	Zambia	East Africa		Central	Clinical (Human)	Human	Clinical	2023
GCA_046633005.1	SAMN44369302	NA	PDT002565340.1	Zambia: Southern	SRR31063737	not collected	Zambia	East Africa		Southern	Clinical (Human)	Human	Clinical	2024
GCA_046633025.1	SAMN44369165	NA	PDT002565305.1	Zambia: Lusaka	SRR31063702	not collected	Zambia	East Africa		Lusaka	Clinical (Human)	Human	Clinical	2024
GCA_046633045.1	SAMN44369136	NA	PDT002565218.1	Zambia: Lusaka	SRR31063615	not collected	Zambia	East Africa		Lusaka	Clinical (Human)	Human	Clinical	2024
GCA_046633065.1	SAMN44369334	NA	PDT002565208.1	Zambia: North-Western	SRR31063605	not collected	Zambia	East Africa		North-Western	Clinical (Human)	Human	Clinical	2024
GCA_046633085.1	SAMN44369340	NA	PDT002565201.1	Zambia: Copperbelt	SRR31063598	not collected	Zambia	East Africa		Copperbelt	Clinical (Human)	Human	Clinical	2024
GCA_046633105.1	SAMN44369338	NA	PDT002565203.1	Zambia: Copperbelt	SRR31063600	not collected	Zambia	East Africa		Copperbelt	Clinical (Human)	Human	Clinical	2024
GCA_046633125.1	SAMN44369213	NA	PDT002565181.1	Zambia: Northern	SRR31063578	not collected	Zambia	East Africa		Northern	Clinical (Human)	Human	Clinical	2023
GCA_046633145.1	SAMN44369279	NA	PDT002565178.1	Zambia: Northern	SRR31063575	not collected	Zambia	East Africa		Northern	Clinical (Human)	Human	Clinical	2023
GCA_046633165.1	SAMN44369133	NA	PDT002565161.1	Zambia: Lusaka	SRR31063558	not collected	Zambia	East Africa		Lusaka	Clinical (Human)	Human	Clinical	2023
GCA_046633185.1	SAMN44369281	NA	PDT002565176.1	Zambia: Northern	SRR31063573	not collected	Zambia	East Africa		Northern	Clinical (Human)	Human	Clinical	2024
GCA_046633205.1	SAMN44369299	NA	PDT002565156.1	Zambia: Northern	SRR31063553	not collected	Zambia	East Africa		Northern	Clinical (Human)	Human	Clinical	2023
GCA_046633225.1	SAMN43684718	NA	PDT002565123.1	Mozambique: Nassa	SRR31002841	not collected	Mozambique	East Africa		Nassa	Clinical (Human)	Human	Clinical	2023
GCA_046633245.1	SAMN44369118	NA	PDT002565141.1	Zambia: Lusaka	SRR31063538	not collected	Zambia	East Africa		Lusaka	Clinical (Human)	Human	Clinical	2023
GCA_046633265.1	SAMN43684717	NA	PDT002565124.1	Mozambique: Nassa	SRR31002842	not collected	Mozambique	East Africa		Nassa	Clinical (Human)	Human	Clinical	2023
GCA_046633285.1	SAMN43684721	NA	PDT002565119.1	Mozambique: Tete	SRR31002837	not collected	Mozambique	East Africa		Tete	Clinical (Human)	Human	Clinical	2023
GCA_046633305.1	SAMN43963861	NA	PDT002565091.1	Nigeria	SRR30823481	not collected	Nigeria	West Africa			Clinical (Human)	Human	Clinical	2018
GCA_046633325.1	SAMN43963767	NA	PDT002565086.1	Nigeria: Kano	SRR30823476	not collected	Nigeria	West Africa		Kano	Clinical (Human)	Human	Clinical	2021
GCA_046633345.1	SAMN43963867	NA	PDT002565084.1	Nigeria: Adamawa	SRR30823474	not collected	Nigeria	West Africa		Adamawa	Clinical (Human)	Human	Clinical	2019
GCA_046633365.1	SAMN43963870	NA	PDT002565081.1	Nigeria: Adamawa	SRR30823471	not collected	Nigeria	West Africa		Adamawa	Clinical (Human)	Human	Clinical	2019
GCA_046633385.1	SAMN43963872	NA	PDT002565079.1	Nigeria: Adamawa	SRR30823469	not collected	Nigeria	West Africa		Adamawa	Clinical (Human)	Human	Clinical	2019
GCA_046633405.1	SAMN43963784	NA	PDT002565071.1	Nigeria: Yobe	SRR30823461	not collected	Nigeria	West Africa		Yobe	Clinical (Human)	Human	Clinical	2022
GCA_046633425.1	SAMN43963759	NA	PDT002565069.1	Nigeria: Zamfara	SRR30823459	not collected	Nigeria	West Africa		Zamfara	Clinical (Human)	Human	Clinical	2021
GCA_046633445.1	SAMN43963790	NA	PDT002565064.1	Nigeria: Borno	SRR30823454	not collected	Nigeria	West Africa		Borno	Clinical (Human)	Human	Clinical	2022
GCA_046633465.1	SAMN43963793	NA	PDT002565061.1	Nigeria: Borno	SRR30823451	not collected	Nigeria	West Africa		Borno	Clinical (Human)	Human	Clinical	2022
GCA_046633485.1	SAMN43963799	NA	PDT002565054.1	Nigeria: Borno	SRR30823444	not collected	Nigeria	West Africa		Borno	Clinical (Human)	Human	Clinical	2022
GCA_046633505.1	SAMN43963877	NA	PDT002565049.1	Nigeria: Adamawa	SRR30823439	not collected	Nigeria	West Africa		Adamawa	Clinical (Human)	Human	Clinical	2019
GCA_046633525.1	SAMN43963882	NA	PDT002565044.1	Nigeria: Adamawa	SRR30823434	not collected	Nigeria	West Africa		Adamawa	Clinical (Human)	Human	Clinical	2019
GCA_046633645.1	SAMN43963886	NA	PDT002565039.1	Nigeria	SRR30823429	not collected	Nigeria	West Africa			Clinical (Human)	Human	Clinical	2019
GCA_046633665.1	SAMN43963774	NA	PDT002565034.1	Nigeria: Kebbi	SRR30823424	not collected	Nigeria	West Africa		Kebbi	Clinical (Human)	Human	Clinical	2021
GCA_046633675.1	SAMN43963758	NA	PDT002565032.1	Nigeria: Sokoto	SRR30823422	not collected	Nigeria	West Africa		Sokoto	Clinical (Human)	Human	Clinical	2021
GCA_046633705.1	SAMN43963805	NA	PDT002565024.1	Nigeria: Gombe	SRR30823414	not collected	Nigeria	West Africa		Gombe	Clinical (Human)	Human	Clinical	2022
GCA_046633725.1	SAMN43963809	NA	PDT002565019.1	Nigeria: Lagos	SRR30823409	not collected	Nigeria	West Africa		Lagos	Clinical (Human)	Human	Clinical	2024
GCA_046633805.1	SAMN43963811	NA	PDT002565017.1	Nigeria: Lagos	SRR30823407	not collected	Nigeria	West Africa		Lagos	Clinical (Human)	Human	Clinical	2024
GCA_046633855.1	SAMN43792858	NA	PDT002565434.1	Democratic Republic of the Congo: Sud-Kivu	SRR31411788	not collected	Democratic Republic of the Congo	Central Africa		Sud-Kivu	Clinical (Human)	Human	Clinical	2021
GCA_046633925.1	SAMN43792775	NA	PDT002565515.1	Democratic Republic of the Congo: Nord-Kivu	SRR31411869	not collected	Democratic Republic of the Congo	Central Africa		Nord-Kivu	Clinical (Human)	Human	Clinical	2023
GCA_046633965.1	SAMN44369306	NA	PDT002565335.1	Zambia: Central	SRR31063732	not collected	Zambia	East Africa		Central	Clinical (Human)	Human	Clinical	2024
GCA_046633985.1	SAMN43963814	NA	PDT002565014.1	Nigeria: Lagos	SRR30823404	not collected	Nigeria	West Africa		Lagos	Clinical (Human)	Human	Clinical	2024
GCA_046634005.1	SAMN44369319	NA	PDT002565320.1	Zambia: North-Western	SRR31063717	not collected	Zambia	East Africa		North-Western	Clinical (Human)	Human	Clinical	2023
GCA_046634035.1	SAMN44369242	NA	PDT002565286.1	Zambia: Copperbelt	SRR31063683	not collected	Zambia	East Africa		Copperbelt	Clinical (Human)	Human	Clinical	2024
GCA_046634105.1	SAMN44369273	NA	PDT002565228.1	Zambia: Eastern	SRR31063625	not collected	Zambia	East Africa		Eastern	Clinical (Human)	Human	Clinical	2024
GCA_046634155.1	SAMN43963801	NA	PDT002565052.1	Nigeria: Borno	SRR30823442	not collected	Nigeria	West Africa		Borno	Clinical (Human)	Human	Clinical	2022
GCA_046634175.1	SAMN43963788	NA	PDT002565066.1	Nigeria: Borno	SRR30823456	not collected	Nigeria	West Africa		Borno	Clinical (Human)	Human	Clinical	2022
GCA_046634185.1	SAMN43963771	NA	PDT002565037.1	Nigeria: Niger	SRR30823427	not collected	Nigeria	West Africa		Niger	Clinical (Human)	Human	Clinical	2021
GCA_046634215.1	SAMN43963778	NA	PDT002565029.1	Nigeria: Katsina	SRR30823419	not collected	Nigeria	West Africa		Katsina	Clinical (Human)	Human	Clinical	2022
GCA_046634295.1	SAMN43963818	NA	PDT002565009.1	Nigeria: Lagos	SRR30823399	not collected	Nigeria	West Africa		Lagos	Clinical (Human)	Human	Clinical	2024
GCA_046634355.1	SAMN43963823	NA	PDT002565004.1	Nigeria: Lagos	SRR30823394	not collected	Nigeria	West Africa		Lagos	Clinical (Human)	Human	Clinical	2024
GCA_046634375.1	SAMN43963832	NA	PDT002564994.1	Nigeria: Plateau	SRR30823384	not collected	Nigeria	West Africa		Plateau	Clinical (Human)	Human	Clinical	2018
GCA_046634425.1	SAMN43963834	NA	PDT002564992.1	Nigeria: Borno	SRR30823382	not collected	Nigeria	West Africa		Borno	Clinical (Human)	Human	Clinical	2018
GCA_046634445.1	SAMN43963764	NA	PDT002564990.1	Nigeria: Kano	SRR30823380	not collected	Nigeria	West Africa		Kano	Clinical (Human)	Human	Clinical	2021
GCA_046634475.1	SAMN43963827	NA	PDT002564999.1	Nigeria: Lagos	SRR30823389	not collected	Nigeria	West Africa		Lagos	Clinical (Human)	Human	Clinical	2024
GCA_046634525.1	SAMN43963841	NA	PDT002564984.1	Nigeria: Borno	SRR30823374	not collected	Nigeria	West Africa		Borno	Clinical (Human)	Human	Clinical	2018
GCA_046634545.1	SAMN43963836	NA	PDT002564989.1	Nigeria: Borno	SRR30823379	not collected	Nigeria	West Africa		Borno	Clinical (Human)	Human	Clinical	2018
GCA_046634585.1	SAMN43963850	NA	PDT002564974.1	Nigeria: Niger	SRR30823364	not collected	Nigeria	West Africa		Niger	Clinical (Human)	Human	Clinical	2018
GCA_046634625.1	SAMN43963765	NA	PDT002564979.1	Nigeria: Kano	SRR30823369	not collected	Nigeria	West Africa		Kano	Clinical (Human)	Human	Clinical	2021
GCA_046634655.1	SAMN43881792	NA	PDT002564964.1	Cameroon: Centre	SRR30765765	not collected	Cameroon	Central Africa		Centre	Clinical (Human)	Human	Clinical	2023
GCA_046634685.1	SAMN43881794	NA	PDT002564962.1	Cameroon: Centre	SRR30765763	not collected	Cameroon	Central Africa		Centre	Clinical (Human)	Human	Clinical	2023
GCA_046634735.1	SAMN43881797	NA	PDT002564959.1	Cameroon: Littoral	SRR30765760	not collected	Cameroon	Central Africa		Littoral	Clinical (Human)	Human	Clinical	2023
GCA_046634755.1	SAMN43963855	NA	PDT002564969.1	Nigeria: Adamawa	SRR30823359	not collected	Nigeria	West Africa		Adamawa	Clinical (Human)	Human	Clinical	2018
GCA_046634765.1	SAMN43881799	NA	PDT002564957.1	Cameroon: Littoral	SRR30765758	not collected	Cameroon	Central Africa		Littoral	Clinical (Human)	Human	Clinical	2023
GCA_046634805.1	SAMN43881800	NA	PDT002564955.1	Cameroon: Littoral	SRR30765756	not collected	Cameroon	Central Africa		Littoral	Clinical (Human)	Human	Clinical	2023
GCA_046634835.1	SAMN43881801	NA	PDT002564954.1	Cameroon: Littoral	SRR30765755	not collected	Cameroon	Central Africa		Littoral	Clinical (Human)	Human	Clinical	2023
GCA_046634875.1	SAMN43881805	NA	PDT002564950.1	Cameroon: Centre	SRR30765751	not collected	Cameroon	Central Africa		Centre	Clinical (Human)	Human	Clinical	2023
GCA_046634915.1	SAMN43881808	NA	PDT002564947.1	Cameroon: Centre	SRR30765748	not collected	Cameroon	Central Africa		Centre	Clinical (Human)	Human	Clinical	2023
GCA_046634985.1	SAMN43881803	NA	PDT002564952.1	Cameroon: Littoral	SRR30765753	not collected	Cameroon	Central Africa		Littoral	Clinical (Human)	Human	Clinical	2023
GCA_046636025.1	SAMN43881788	NA	PDT002564939.1	Cameroon: Centre	SRR30765740	not collected	Cameroon	Central Africa		Centre	Clinical (Human)	Human	Clinical	2023
GCA_046636055.1	SAMN43554750	NA	PDT002564934.1	Uganda: Kotido	SRR30613529	not collected	Uganda	East Africa		Kotido	Clinical (Human)	Human	Clinical	2020
GCA_046636145.1	SAMN43881810	NA	PDT002564944.1	Cameroon: Centre	SRR30765745	not collected	Cameroon	Central Africa		Centre	Clinical (Human)	Human	Clinical	2023
GCA_046636165.1	SAMN43881785	NA	PDT002564942.1	Cameroon: Centre	SRR30765743	not collected	Cameroon	Central Africa		Centre	Clinical (Human)	Human	Clinical	2023
GCA_046636185.1	SAMN43554753	NA	PDT002564931.1	Uganda: Mbale	SRR30613526	not collected	Uganda	East Africa		Mbale	Clinical (Human)	Human	Clinical	2020
GCA_046636225.1	SAMN43554718	NA	PDT002564936.1	Uganda: Isingiro	SRR30613531	not collected	Uganda	East Africa		Isingiro	Clinical (Human)	Human	Clinical	2019
GCA_046636285.1	SAMN43554752	NA	PDT002564932.1	Uganda: Mbale	SRR30613527	not collected	Uganda	East Africa		Mbale	Clinical (Human)	Human	Clinical	2020
GCA_046636305.1	SAMN43554762	NA	PDT002564921.1	Uganda: Kyotera	SRR30613516	not collected	Uganda	East Africa		Kyotera	Clinical (Human)	Human	Clinical	2024
GCA_046636345.1	SAMN43554758	NA	PDT002564925.1	Uganda: Kyotera	SRR30613520	not collected	Uganda	East Africa		Kyotera	Clinical (Human)	Human	Clinical	2024
GCA_046636435.1	SAMN43554761	NA	PDT002564922.1	Uganda: Kyotera	SRR30613517	not collected	Uganda	East Africa		Kyotera	Clinical (Human)	Human	Clinical	2024
GCA_046636465.1	SAMN43554728	NA	PDT002564914.1	Uganda: Kayunga	SRR30613509	not collected	Uganda	East Africa		Kayunga	Clinical (Human)	Human	Clinical	2023
GCA_046636485.1	SAMN43554725	NA	PDT002564916.1	Uganda: Kayunga	SRR30613511	not collected	Uganda	East Africa		Kayunga	Clinical (Human)	Human	Clinical	2023
GCA_046636525.1	SAMN43554754	NA	PDT002564930.1	Uganda: Mbale	SRR30613525	not collected	Uganda	East Africa		Mbale	Clinical (Human)	Human	Clinical	2020
GCA_046636555.1	SAMN43554731	NA	PDT002564911.1	Uganda: Kayunga	SRR30613506	not collected	Uganda	East Africa		Kayunga	Clinical (Human)	Human	Clinical	2023
GCA_046636605.1	SAMN43554730	NA	PDT002564912.1	Uganda: Kayunga	SRR30613507	not collected	Uganda	East Africa		Kayunga	Clinical (Human)	Human	Clinical	2023
GCA_046636625.1	SAMN43554733	NA	PDT002564909.1	Uganda: Kayunga	SRR30613504	not collected	Uganda	East Africa		Kayunga	Clinical (Human)	Human	Clinical	2023
GCA_046636635.1	SAMN43554732	NA	PDT002564910.1	Uganda: Kayunga	SRR30613505	not collected	Uganda	East Africa		Kayunga	Clinical (Human)	Human	Clinical	2023
GCA_046636685.1	SAMN43554736	NA	PDT002564906.1	Uganda: Kayunga	SRR30613501	not collected	Uganda	East Africa		Kayunga	Clinical (Human)	Human	Clinical	2023
GCA_046636785.1	SAMN43792946	NA	PDT002565505.1	Democratic Republic of the Congo: Nord-Kivu	SRR31411859	not collected	Democratic Republic of the Congo	Central Africa		Nord-Kivu	Clinical (Human)	Human	Clinical	2022
GCA_046636805.1	SAMN43792953	NA	PDT002565500.1	Democratic Republic of the Congo: Sud-Kivu	SRR31411854	not collected	Democratic Republic of the Congo	Central Africa		Sud-Kivu	Clinical (Human)	Human	Clinical	2023
GCA_046636825.1	SAMN43792954	NA	PDT002565499.1	Democratic Republic of the Congo: Sud-Kivu	SRR31411853	not collected	Democratic Republic of the Congo	Central Africa		Sud-Kivu	Clinical (Human)	Human	Clinical	2023
GCA_046636915.1	SAMN43792985	NA	PDT002565490.1	Democratic Republic of the Congo: Haut-Katanga	SRR31411844	not collected	Democratic Republic of the Congo	Central Africa		Haut-Katanga	Clinical (Human)	Human	Clinical	2024
GCA_046636945.1	SAMN43792990	NA	PDT002565485.1	Democratic Republic of the Congo: Haut-Katanga	SRR31411839	not collected	Democratic Republic of the Congo	Central Africa		Haut-Katanga	Clinical (Human)	Human	Clinical	2024
GCA_046636965.1	SAMN43792922	NA	PDT002565507.1	Democratic Republic of the Congo: Nord-Kivu	SRR31411861	not collected	Democratic Republic of the Congo	Central Africa		Nord-Kivu	Clinical (Human)	Human	Clinical	2022
GCA_046636985.1	SAMN43792991	NA	PDT002565484.1	Democratic Republic of the Congo: Haut-Katanga	SRR31411838	not collected	Democratic Republic of the Congo	Central Africa		Haut-Katanga	Clinical (Human)	Human	Clinical	2024
GCA_046637015.1	SAMN43792776	NA	PDT002565478.1	Democratic Republic of the Congo: Nord-Kivu	SRR31411832	not collected	Democratic Republic of the Congo	Central Africa		Nord-Kivu	Clinical (Human)	Human	Clinical	2023
GCA_046637035.1	SAMN43792798	NA	PDT002565473.1	Democratic Republic of the Congo: Haut-Lomami	SRR31411827	not collected	Democratic Republic of the Congo	Central Africa		Haut-Lomami	Clinical (Human)	Human	Clinical	2023
GCA_046637115.1	SAMN43792804	NA	PDT002565470.1	Democratic Republic of the Congo: Haut-Lomami	SRR31411824	not collected	Democratic Republic of the Congo	Central Africa		Haut-Lomami	Clinical (Human)	Human	Clinical	2023
GCA_046637145.1	SAMN43792886	NA	PDT002565463.1	Democratic Republic of the Congo: Nord-Kivu	SRR31411817	not collected	Democratic Republic of the Congo	Central Africa		Nord-Kivu	Clinical (Human)	Human	Clinical	2022
GCA_046637165.1	SAMN43792877	NA	PDT002565467.1	Democratic Republic of the Congo: Nord-Kivu	SRR31411821	not collected	Democratic Republic of the Congo	Central Africa		Nord-Kivu	Clinical (Human)	Human	Clinical	2024
GCA_046637195.1	SAMN43792962	NA	PDT002565460.1	Democratic Republic of the Congo: Sud-Kivu	SRR31411814	not collected	Democratic Republic of the Congo	Central Africa		Sud-Kivu	Clinical (Human)	Human	Clinical	2023
GCA_046637265.1	SAMN43792967	NA	PDT002565455.1	Democratic Republic of the Congo: Sud-Kivu	SRR31411809	not collected	Democratic Republic of the Congo	Central Africa		Sud-Kivu	Clinical (Human)	Human	Clinical	2023
GCA_046637285.1	SAMN43792969	NA	PDT002565453.1	Democratic Republic of the Congo: Sud-Kivu	SRR31411807	not collected	Democratic Republic of the Congo	Central Africa		Sud-Kivu	Clinical (Human)	Human	Clinical	2023
GCA_046637345.1	SAMN43792787	NA	PDT002565451.1	Democratic Republic of the Congo: Nord-Kivu	SRR31411805	not collected	Democratic Republic of the Congo	Central Africa		Nord-Kivu	Clinical (Human)	Human	Clinical	2023
GCA_046637385.1	SAMN43792977	NA	PDT002565444.1	Democratic Republic of the Congo: Sud-Kivu	SRR31411798	not collected	Democratic Republic of the Congo	Central Africa		Sud-Kivu	Clinical (Human)	Human	Clinical	2022
GCA_046637415.1	SAMN43792973	NA	PDT002565448.1	Democratic Republic of the Congo: Sud-Kivu	SRR31411802	not collected	Democratic Republic of the Congo	Central Africa		Sud-Kivu	Clinical (Human)	Human	Clinical	2023
GCA_046637455.1	SAMN43792981	NA	PDT002565439.1	Democratic Republic of the Congo: Nord-Kivu	SRR31411793	not collected	Democratic Republic of the Congo	Central Africa		Nord-Kivu	Clinical (Human)	Human	Clinical	2023
GCA_046637475.1	SAMN43792978	NA	PDT002565443.1	Democratic Republic of the Congo: Haut-Lomami	SRR31411797	not collected	Democratic Republic of the Congo	Central Africa		Haut-Lomami	Clinical (Human)	Human	Clinical	2024
GCA_046637515.1	SAMN43792854	NA	PDT002565438.1	Democratic Republic of the Congo: Sud-Kivu	SRR31411792	not collected	Democratic Republic of the Congo	Central Africa		Sud-Kivu	Clinical (Human)	Human	Clinical	2022
GCA_046637565.1	SAMN43792869	NA	PDT002565422.1	Democratic Republic of the Congo: Nord-Kivu	SRR31411776	not collected	Democratic Republic of the Congo	Central Africa		Nord-Kivu	Clinical (Human)	Human	Clinical	2024
GCA_046637585.1	SAMN43792864	NA	PDT002565427.1	Democratic Republic of the Congo: Sud-Kivu	SRR31411781	not collected	Democratic Republic of the Congo	Central Africa		Sud-Kivu	Clinical (Human)	Human	Clinical	2021
GCA_046637635.1	SAMN43792777	NA	PDT002565413.1	Democratic Republic of the Congo: Nord-Kivu	SRR31411767	not collected	Democratic Republic of the Congo	Central Africa		Nord-Kivu	Clinical (Human)	Human	Clinical	2022
GCA_046637665.1	SAMN43792783	NA	PDT002565419.1	Democratic Republic of the Congo: Nord-Kivu	SRR31411773	not collected	Democratic Republic of the Congo	Central Africa		Nord-Kivu	Clinical (Human)	Human	Clinical	2023
GCA_046637725.1	SAMN43792822	NA	PDT002565398.1	Democratic Republic of the Congo: Nord-Kivu	SRR31411752	not collected	Democratic Republic of the Congo	Central Africa		Nord-Kivu	Clinical (Human)	Human	Clinical	2022
GCA_046638695.1	SAMN43792848	NA	PDT002565373.1	Democratic Republic of the Congo: Sud-Kivu	SRR31411727	not collected	Democratic Republic of the Congo	Central Africa		Sud-Kivu	Clinical (Human)	Human	Clinical	2022
GCA_046638705.1	SAMN43792851	NA	PDT002565370.1	Democratic Republic of the Congo: Sud-Kivu	SRR31411724	not collected	Democratic Republic of the Congo	Central Africa		Sud-Kivu	Clinical (Human)	Human	Clinical	2021
GCA_046638745.1	SAMN43792830	NA	PDT002565392.1	Democratic Republic of the Congo: Nord-Kivu	SRR31411746	not collected	Democratic Republic of the Congo	Central Africa		Nord-Kivu	Clinical (Human)	Human	Clinical	2022
GCA_046638785.1	SAMN43792842	NA	PDT002565378.1	Democratic Republic of the Congo: Nord-Kivu	SRR31411732	not collected	Democratic Republic of the Congo	Central Africa		Nord-Kivu	Clinical (Human)	Human	Clinical	2022
GCA_046638825.1	SAMN43792846	NA	PDT002565375.1	Democratic Republic of the Congo: Nord-Kivu	SRR31411729	not collected	Democratic Republic of the Congo	Central Africa		Nord-Kivu	Clinical (Human)	Human	Clinical	2023
GCA_046638945.1	SAMN43792781	NA	PDT002565369.1	Democratic Republic of the Congo: Nord-Kivu	SRR31411723	not collected	Democratic Republic of the Congo	Central Africa		Nord-Kivu	Clinical (Human)	Human	Clinical	2022
GCA_046638985.1	SAMN43792852	NA	PDT002565368.1	Democratic Republic of the Congo: Sud-Kivu	SRR31411722	not collected	Democratic Republic of the Congo	Central Africa		Sud-Kivu	Clinical (Human)	Human	Clinical	2022
GCA_046639015.1	SAMN44369116	NA	PDT002565365.1	Zambia: Lusaka	SRR31063762	not collected	Zambia	East Africa		Lusaka	Clinical (Human)	Human	Clinical	2023
GCA_046639045.1	SAMN44369223	NA	PDT002565355.1	Zambia: Eastern	SRR31063752	not collected	Zambia	East Africa		Eastern	Clinical (Human)	Human	Clinical	2023
GCA_046639065.1	SAMN44369215	NA	PDT002565363.1	Zambia: Northern	SRR31063760	not collected	Zambia	East Africa		Northern	Clinical (Human)	Human	Clinical	2023
GCA_046639285.1	SAMN44369135	NA	PDT002565325.1	Zambia: Central	SRR31063722	not collected	Zambia	East Africa		Central	Clinical (Human)	Human	Clinical	2024
GCA_046639295.1	SAMN44369227	NA	PDT002565350.1	Zambia: Eastern	SRR31063747	not collected	Zambia	East Africa		Eastern	Clinical (Human)	Human	Clinical	2024
GCA_046639305.1	SAMN43554719	NA	PDT002564905.1	Uganda: Kayunga	SRR30613500	not collected	Uganda	East Africa		Kayunga	Clinical (Human)	Human	Clinical	2023
GCA_046639315.1	SAMN43554737	NA	PDT002564904.1	Uganda: Kayunga	SRR30613499	not collected	Uganda	East Africa		Kayunga	Clinical (Human)	Human	Clinical	2020
GCA_046639355.1	SAMN43554741	NA	PDT002564900.1	Uganda: Namayingo	SRR30613495	not collected	Uganda	East Africa		Namayingo	Clinical (Human)	Human	Clinical	2023
GCA_046639565.1	SAMN43554742	NA	PDT002564899.1	Uganda: Namayingo	SRR30613494	not collected	Uganda	East Africa		Namayingo	Clinical (Human)	Human	Clinical	2023
GCA_046639575.1	SAMN43554744	NA	PDT002564897.1	Uganda: Nabilatuk	SRR30613492	not collected	Uganda	East Africa		Nabilatuk	Clinical (Human)	Human	Clinical	2020
GCA_046639665.1	SAMN43554720	NA	PDT002564894.1	Uganda: Hoima	SRR30613489	not collected	Uganda	East Africa		Hoima	Clinical (Human)	Human	Clinical	2018
GCA_046639725.1	SAMN43554748	NA	PDT002564892.1	Uganda: Nabilatuk	SRR30613487	not collected	Uganda	East Africa		Nabilatuk	Clinical (Human)	Human	Clinical	2020
GCA_046639885.1	SAMN43517963	NA	PDT002564887.1	Malawi: Northern Region	SRR30566922	not collected	Malawi	East Africa		Northern Region	Clinical (Human)	Human	Clinical	2023
GCA_046639925.1	SAMN43517965	NA	PDT002564885.1	Malawi: Central Region	SRR30566920	not collected	Malawi	East Africa		Central Region	Clinical (Human)	Human	Clinical	2022
GCA_046689445.1	SAMN43792887	NA	PDT002565513.1	Democratic Republic of the Congo: Nord-Kivu	SRR31411867	not collected	Democratic Republic of the Congo	Central Africa		Nord-Kivu	Clinical (Human)	Human	Clinical	2021
GCA_046689465.1	SAMN43792895	NA	PDT002565512.1	Democratic Republic of the Congo: Nord-Kivu	SRR31411866	not collected	Democratic Republic of the Congo	Central Africa		Nord-Kivu	Clinical (Human)	Human	Clinical	2021
GCA_046689505.1	SAMN43792898	NA	PDT002565511.1	Democratic Republic of the Congo: Nord-Kivu	SRR31411865	not collected	Democratic Republic of the Congo	Central Africa		Nord-Kivu	Clinical (Human)	Human	Clinical	2022
GCA_046689565.1	SAMN43792907	NA	PDT002565510.1	Democratic Republic of the Congo: Nord-Kivu	SRR31411864	not collected	Democratic Republic of the Congo	Central Africa		Nord-Kivu	Clinical (Human)	Human	Clinical	2023
GCA_046689595.1	SAMN43792921	NA	PDT002565508.1	Democratic Republic of the Congo: Nord-Kivu	SRR31411862	not collected	Democratic Republic of the Congo	Central Africa		Nord-Kivu	Clinical (Human)	Human	Clinical	2023
GCA_046689665.1	SAMN43792952	NA	PDT002565501.1	Democratic Republic of the Congo: Sud-Kivu	SRR31411855	not collected	Democratic Republic of the Congo	Central Africa		Sud-Kivu	Clinical (Human)	Human	Clinical	2023
GCA_046689685.1	SAMN43792931	NA	PDT002565506.1	Democratic Republic of the Congo: Nord-Kivu	SRR31411860	not collected	Democratic Republic of the Congo	Central Africa		Nord-Kivu	Clinical (Human)	Human	Clinical	2023
GCA_046689725.1	SAMN43792785	NA	PDT002565503.1	Democratic Republic of the Congo: Nord-Kivu	SRR31411857	not collected	Democratic Republic of the Congo	Central Africa		Nord-Kivu	Clinical (Human)	Human	Clinical	2022
GCA_046689745.1	SAMN43792955	NA	PDT002565498.1	Democratic Republic of the Congo: Sud-Kivu	SRR31411852	not collected	Democratic Republic of the Congo	Central Africa		Sud-Kivu	Clinical (Human)	Human	Clinical	2022
GCA_046689865.1	SAMN43792957	NA	PDT002565496.1	Democratic Republic of the Congo: Sud-Kivu	SRR31411850	not collected	Democratic Republic of the Congo	Central Africa		Sud-Kivu	Clinical (Human)	Human	Clinical	2023
GCA_046689875.1	SAMN43792960	NA	PDT002565493.1	Democratic Republic of the Congo: Sud-Kivu	SRR31411847	not collected	Democratic Republic of the Congo	Central Africa		Sud-Kivu	Clinical (Human)	Human	Clinical	2022
GCA_046689925.1	SAMN43792984	NA	PDT002565491.1	Democratic Republic of the Congo: Haut-Katanga	SRR31411845	not collected	Democratic Republic of the Congo	Central Africa		Haut-Katanga	Clinical (Human)	Human	Clinical	2024
GCA_046689945.1	SAMN43792986	NA	PDT002565489.1	Democratic Republic of the Congo: Haut-Katanga	SRR31411843	not collected	Democratic Republic of the Congo	Central Africa		Haut-Katanga	Clinical (Human)	Human	Clinical	2024
GCA_046690025.1	SAMN43792989	NA	PDT002565486.1	Democratic Republic of the Congo: Haut-Katanga	SRR31411840	not collected	Democratic Republic of the Congo	Central Africa		Haut-Katanga	Clinical (Human)	Human	Clinical	2024
GCA_046690065.1	SAMN43792791	NA	PDT002565481.1	Democratic Republic of the Congo: Nord-Kivu	SRR31411835	not collected	Democratic Republic of the Congo	Central Africa		Nord-Kivu	Clinical (Human)	Human	Clinical	2022
GCA_046690085.1	SAMN43792790	NA	PDT002565482.1	Democratic Republic of the Congo: Nord-Kivu	SRR31411836	not collected	Democratic Republic of the Congo	Central Africa		Nord-Kivu	Clinical (Human)	Human	Clinical	2023
GCA_046690105.1	SAMN43792795	NA	PDT002565476.1	Democratic Republic of the Congo: Nord-Kivu	SRR31411830	not collected	Democratic Republic of the Congo	Central Africa		Nord-Kivu	Clinical (Human)	Human	Clinical	2023
GCA_046690125.1	SAMN43792987	NA	PDT002565488.1	Democratic Republic of the Congo: Haut-Katanga	SRR31411842	not collected	Democratic Republic of the Congo	Central Africa		Haut-Katanga	Clinical (Human)	Human	Clinical	2024
GCA_046690225.1	SAMN43792796	NA	PDT002565475.1	Democratic Republic of the Congo: Haut-Lomami	SRR31411829	not collected	Democratic Republic of the Congo	Central Africa		Haut-Lomami	Clinical (Human)	Human	Clinical	2023
GCA_046690245.1	SAMN43792876	NA	PDT002565468.1	Democratic Republic of the Congo: Nord-Kivu	SRR31411822	not collected	Democratic Republic of the Congo	Central Africa		Nord-Kivu	Clinical (Human)	Human	Clinical	2024
GCA_046690285.1	SAMN43792789	NA	PDT002565483.1	Democratic Republic of the Congo: Nord-Kivu	SRR31411837	not collected	Democratic Republic of the Congo	Central Africa		Nord-Kivu	Clinical (Human)	Human	Clinical	2023
GCA_046690325.1	SAMN43792878	NA	PDT002565466.1	Democratic Republic of the Congo	SRR31411820	not collected	Democratic Republic of the Congo	Central Africa			Clinical (Human)	Human	Clinical	2023
GCA_046690405.1	SAMN43792802	NA	PDT002565471.1	Democratic Republic of the Congo: Haut-Lomami	SRR31411825	not collected	Democratic Republic of the Congo	Central Africa		Haut-Lomami	Clinical (Human)	Human	Clinical	2022
GCA_046690425.1	SAMN43792966	NA	PDT002565456.1	Democratic Republic of the Congo: Sud-Kivu	SRR31411810	not collected	Democratic Republic of the Congo	Central Africa		Sud-Kivu	Clinical (Human)	Human	Clinical	2023
GCA_046690465.1	SAMN43792975	NA	PDT002565446.1	Democratic Republic of the Congo: Sud-Kivu	SRR31411800	not collected	Democratic Republic of the Congo	Central Africa		Sud-Kivu	Clinical (Human)	Human	Clinical	2023
GCA_046690485.1	SAMN43792980	NA	PDT002565441.1	Democratic Republic of the Congo: Haut-Lomami	SRR31411795	not collected	Democratic Republic of the Congo	Central Africa		Haut-Lomami	Clinical (Human)	Human	Clinical	2024
GCA_046690525.1	SAMN43792855	NA	PDT002565437.1	Democratic Republic of the Congo: Sud-Kivu	SRR31411791	not collected	Democratic Republic of the Congo	Central Africa		Sud-Kivu	Clinical (Human)	Human	Clinical	2021
GCA_046690545.1	SAMN43792859	NA	PDT002565433.1	Democratic Republic of the Congo: Sud-Kivu	SRR31411787	not collected	Democratic Republic of the Congo	Central Africa		Sud-Kivu	Clinical (Human)	Human	Clinical	2021
GCA_046690605.1	SAMN43792856	NA	PDT002565436.1	Democratic Republic of the Congo: Sud-Kivu	SRR31411790	not collected	Democratic Republic of the Congo	Central Africa		Sud-Kivu	Clinical (Human)	Human	Clinical	2021
GCA_046690625.1	SAMN43792857	NA	PDT002565435.1	Democratic Republic of the Congo: Sud-Kivu	SRR31411789	not collected	Democratic Republic of the Congo	Central Africa		Sud-Kivu	Clinical (Human)	Human	Clinical	2021
GCA_046690665.1	SAMN43792861	NA	PDT002565431.1	Democratic Republic of the Congo: Sud-Kivu	SRR31411785	not collected	Democratic Republic of the Congo	Central Africa		Sud-Kivu	Clinical (Human)	Human	Clinical	2021
GCA_046690725.1	SAMN43792862	NA	PDT002565429.1	Democratic Republic of the Congo: Sud-Kivu	SRR31411783	not collected	Democratic Republic of the Congo	Central Africa		Sud-Kivu	Clinical (Human)	Human	Clinical	2021
GCA_046690735.1	SAMN43792863	NA	PDT002565428.1	Democratic Republic of the Congo: Sud-Kivu	SRR31411782	not collected	Democratic Republic of the Congo	Central Africa		Sud-Kivu	Clinical (Human)	Human	Clinical	2021
GCA_046690845.1	SAMN43792868	NA	PDT002565423.1	Democratic Republic of the Congo: Nord-Kivu	SRR31411777	not collected	Democratic Republic of the Congo	Central Africa		Nord-Kivu	Clinical (Human)	Human	Clinical	2024
GCA_046690885.1	SAMN43792865	NA	PDT002565426.1	Democratic Republic of the Congo: Sud-Kivu	SRR31411780	not collected	Democratic Republic of the Congo	Central Africa		Sud-Kivu	Clinical (Human)	Human	Clinical	2022
GCA_046690905.1	SAMN43792870	NA	PDT002565421.1	Democratic Republic of the Congo: Nord-Kivu	SRR31411775	not collected	Democratic Republic of the Congo	Central Africa		Nord-Kivu	Clinical (Human)	Human	Clinical	2024
GCA_046690945.1	SAMN43792872	NA	PDT002565418.1	Democratic Republic of the Congo: Nord-Kivu	SRR31411772	not collected	Democratic Republic of the Congo	Central Africa		Nord-Kivu	Clinical (Human)	Human	Clinical	2024
GCA_046690965.1	SAMN43792874	NA	PDT002565416.1	Democratic Republic of the Congo: Nord-Kivu	SRR31411770	not collected	Democratic Republic of the Congo	Central Africa		Nord-Kivu	Clinical (Human)	Human	Clinical	2024
GCA_046691065.1	SAMN43792809	NA	PDT002565411.1	Democratic Republic of the Congo: Haut-Lomami	SRR31411765	not collected	Democratic Republic of the Congo	Central Africa		Haut-Lomami	Clinical (Human)	Human	Clinical	2021
GCA_046691085.1	SAMN43792815	NA	PDT002565406.1	Democratic Republic of the Congo: Nord-Kivu	SRR31411760	not collected	Democratic Republic of the Congo	Central Africa		Nord-Kivu	Clinical (Human)	Human	Clinical	2023
GCA_046691105.1	SAMN43792816	NA	PDT002565405.1	Democratic Republic of the Congo: Nord-Kivu	SRR31411759	not collected	Democratic Republic of the Congo	Central Africa		Nord-Kivu	Clinical (Human)	Human	Clinical	2023
GCA_046691125.1	SAMN43792826	NA	PDT002565396.1	Democratic Republic of the Congo: Nord-Kivu	SRR31411750	not collected	Democratic Republic of the Congo	Central Africa		Nord-Kivu	Clinical (Human)	Human	Clinical	2021
GCA_046691165.1	SAMN43792819	NA	PDT002565401.1	Democratic Republic of the Congo: Nord-Kivu	SRR31411755	not collected	Democratic Republic of the Congo	Central Africa		Nord-Kivu	Clinical (Human)	Human	Clinical	2023
GCA_046691265.1	SAMN43792827	NA	PDT002565395.1	Democratic Republic of the Congo: Nord-Kivu	SRR31411749	not collected	Democratic Republic of the Congo	Central Africa		Nord-Kivu	Clinical (Human)	Human	Clinical	2021
GCA_046691325.1	SAMN43792829	NA	PDT002565393.1	Democratic Republic of the Congo: Nord-Kivu	SRR31411747	not collected	Democratic Republic of the Congo	Central Africa		Nord-Kivu	Clinical (Human)	Human	Clinical	2021
GCA_046691345.1	SAMN43792779	NA	PDT002565391.1	Democratic Republic of the Congo: Nord-Kivu	SRR31411745	not collected	Democratic Republic of the Congo	Central Africa		Nord-Kivu	Clinical (Human)	Human	Clinical	2022
GCA_046691365.1	SAMN43792832	NA	PDT002565389.1	Democratic Republic of the Congo: Nord-Kivu	SRR31411743	not collected	Democratic Republic of the Congo	Central Africa		Nord-Kivu	Clinical (Human)	Human	Clinical	2021
GCA_046691375.1	SAMN43792833	NA	PDT002565388.1	Democratic Republic of the Congo: Nord-Kivu	SRR31411742	not collected	Democratic Republic of the Congo	Central Africa		Nord-Kivu	Clinical (Human)	Human	Clinical	2022
GCA_046691465.1	SAMN43792834	NA	PDT002565387.1	Democratic Republic of the Congo: Nord-Kivu	SRR31411741	not collected	Democratic Republic of the Congo	Central Africa		Nord-Kivu	Clinical (Human)	Human	Clinical	2021
GCA_046691535.1	SAMN43792837	NA	PDT002565384.1	Democratic Republic of the Congo: Nord-Kivu	SRR31411738	not collected	Democratic Republic of the Congo	Central Africa		Nord-Kivu	Clinical (Human)	Human	Clinical	2022
GCA_046691565.1	SAMN43792840	NA	PDT002565381.1	Democratic Republic of the Congo: Nord-Kivu	SRR31411735	not collected	Democratic Republic of the Congo	Central Africa		Nord-Kivu	Clinical (Human)	Human	Clinical	2023
GCA_046691585.1	SAMN43792838	NA	PDT002565383.1	Democratic Republic of the Congo: Nord-Kivu	SRR31411737	not collected	Democratic Republic of the Congo	Central Africa		Nord-Kivu	Clinical (Human)	Human	Clinical	2022
GCA_046691605.1	SAMN43792835	NA	PDT002565386.1	Democratic Republic of the Congo: Nord-Kivu	SRR31411740	not collected	Democratic Republic of the Congo	Central Africa		Nord-Kivu	Clinical (Human)	Human	Clinical	2022
GCA_046691685.1	SAMN43792841	NA	PDT002565379.1	Democratic Republic of the Congo: Nord-Kivu	SRR31411733	not collected	Democratic Republic of the Congo	Central Africa		Nord-Kivu	Clinical (Human)	Human	Clinical	2023
GCA_046691745.1	SAMN43792843	NA	PDT002565377.1	Democratic Republic of the Congo: Nord-Kivu	SRR31411731	not collected	Democratic Republic of the Congo	Central Africa		Nord-Kivu	Clinical (Human)	Human	Clinical	2023
GCA_046691775.1	SAMN43792844	NA	PDT002565376.1	Democratic Republic of the Congo: Nord-Kivu	SRR31411730	not collected	Democratic Republic of the Congo	Central Africa		Nord-Kivu	Clinical (Human)	Human	Clinical	2023
GCA_046692185.1	SAMN43792847	NA	PDT002565374.1	Democratic Republic of the Congo: Sud-Kivu	SRR31411728	not collected	Democratic Republic of the Congo	Central Africa		Sud-Kivu	Clinical (Human)	Human	Clinical	2022
GCA_046692205.1	SAMN43792850	NA	PDT002565371.1	Democratic Republic of the Congo: Sud-Kivu	SRR31411725	not collected	Democratic Republic of the Congo	Central Africa		Sud-Kivu	Clinical (Human)	Human	Clinical	2022
GCA_046692225.1	SAMN43792853	NA	PDT002565367.1	Democratic Republic of the Congo: Sud-Kivu	SRR31411721	not collected	Democratic Republic of the Congo	Central Africa		Sud-Kivu	Clinical (Human)	Human	Clinical	2021
GCA_046692245.1	SAMN44369125	NA	PDT002565364.1	Zambia: Central	SRR31063761	not collected	Zambia	East Africa		Central	Clinical (Human)	Human	Clinical	2024
GCA_046692285.1	SAMN44369115	NA	PDT002565366.1	Zambia: Lusaka	SRR31063763	not collected	Zambia	East Africa		Lusaka	Clinical (Human)	Human	Clinical	2024
GCA_046692365.1	SAMN44369217	NA	PDT002565361.1	Zambia: Northern	SRR31063758	not collected	Zambia	East Africa		Northern	Clinical (Human)	Human	Clinical	2023
GCA_046692405.1	SAMN44369221	NA	PDT002565357.1	Zambia: Eastern	SRR31063754	not collected	Zambia	East Africa		Eastern	Clinical (Human)	Human	Clinical	2024
GCA_046692425.1	SAMN44369220	NA	PDT002565358.1	Zambia: Lusaka	SRR31063755	not collected	Zambia	East Africa		Lusaka	Clinical (Human)	Human	Clinical	2024
GCA_046692445.1	SAMN44369216	NA	PDT002565362.1	Zambia: Eastern	SRR31063759	not collected	Zambia	East Africa		Eastern	Clinical (Human)	Human	Clinical	2024
GCA_046692465.1	SAMN44369219	NA	PDT002565359.1	Zambia: Northern	SRR31063756	not collected	Zambia	East Africa		Northern	Clinical (Human)	Human	Clinical	2023
GCA_046692565.1	SAMN44369222	NA	PDT002565356.1	Zambia: Luapula	SRR31063753	not collected	Zambia	East Africa		Luapula	Clinical (Human)	Human	Clinical	2023
GCA_046692585.1	SAMN44369224	NA	PDT002565354.1	Zambia: Southern	SRR31063751	not collected	Zambia	East Africa		Southern	Clinical (Human)	Human	Clinical	2024
GCA_046692605.1	SAMN44369126	NA	PDT002565353.1	Zambia: Lusaka	SRR31063750	not collected	Zambia	East Africa		Lusaka	Clinical (Human)	Human	Clinical	2024
GCA_046692665.1	SAMN44369225	NA	PDT002565352.1	Zambia: Eastern	SRR31063749	not collected	Zambia	East Africa		Eastern	Clinical (Human)	Human	Clinical	2024
GCA_046692695.1	SAMN44369226	NA	PDT002565351.1	Zambia: Northern	SRR31063748	not collected	Zambia	East Africa		Northern	Clinical (Human)	Human	Clinical	2023
GCA_046692745.1	SAMN44369228	NA	PDT002565349.1	Zambia: Southern	SRR31063746	not collected	Zambia	East Africa		Southern	Clinical (Human)	Human	Clinical	2024
GCA_046692765.1	SAMN44369229	NA	PDT002565348.1	Zambia: Southern	SRR31063745	not collected	Zambia	East Africa		Southern	Clinical (Human)	Human	Clinical	2024
GCA_046692805.1	SAMN44369233	NA	PDT002565344.1	Zambia: Eastern	SRR31063741	not collected	Zambia	East Africa		Eastern	Clinical (Human)	Human	Clinical	2024
GCA_046692865.1	SAMN44369230	NA	PDT002565347.1	Zambia: Southern	SRR31063744	not collected	Zambia	East Africa		Southern	Clinical (Human)	Human	Clinical	2024
GCA_046692905.1	SAMN44369300	NA	PDT002565342.1	Zambia: Eastern	SRR31063739	not collected	Zambia	East Africa		Eastern	Clinical (Human)	Human	Clinical	2024
GCA_046692925.1	SAMN44369231	NA	PDT002565346.1	Zambia: Northern	SRR31063743	not collected	Zambia	East Africa		Northern	Clinical (Human)	Human	Clinical	2023
GCA_046692945.1	SAMN44369234	NA	PDT002565343.1	Zambia: Luapula	SRR31063740	not collected	Zambia	East Africa		Luapula	Clinical (Human)	Human	Clinical	2023
GCA_046693005.1	SAMN44369301	NA	PDT002565341.1	Zambia: Eastern	SRR31063738	not collected	Zambia	East Africa		Eastern	Clinical (Human)	Human	Clinical	2024
GCA_046693045.1	SAMN44369303	NA	PDT002565339.1	Zambia: Luapula	SRR31063736	not collected	Zambia	East Africa		Luapula	Clinical (Human)	Human	Clinical	2023
GCA_046693065.1	SAMN44369134	NA	PDT002565337.1	Zambia: Lusaka	SRR31063734	not collected	Zambia	East Africa		Lusaka	Clinical (Human)	Human	Clinical	2023
GCA_046693085.1	SAMN44369304	NA	PDT002565338.1	Zambia: Central	SRR31063735	not collected	Zambia	East Africa		Central	Clinical (Human)	Human	Clinical	2024
GCA_046693145.1	SAMN44369305	NA	PDT002565336.1	Zambia: Central	SRR31063733	not collected	Zambia	East Africa		Central	Clinical (Human)	Human	Clinical	2024
GCA_046693205.1	SAMN44369308	NA	PDT002565333.1	Zambia: Central	SRR31063730	not collected	Zambia	East Africa		Central	Clinical (Human)	Human	Clinical	2024
GCA_046693245.1	SAMN44369307	NA	PDT002565334.1	Zambia: Central	SRR31063731	not collected	Zambia	East Africa		Central	Clinical (Human)	Human	Clinical	2024
GCA_046693285.1	SAMN44369311	NA	PDT002565330.1	Zambia: Central	SRR31063727	not collected	Zambia	East Africa		Central	Clinical (Human)	Human	Clinical	2024
GCA_046693345.1	SAMN44369310	NA	PDT002565331.1	Zambia: Central	SRR31063728	not collected	Zambia	East Africa		Central	Clinical (Human)	Human	Clinical	2024
GCA_046693385.1	SAMN44369312	NA	PDT002565329.1	Zambia: Central	SRR31063726	not collected	Zambia	East Africa		Central	Clinical (Human)	Human	Clinical	2024
GCA_046693405.1	SAMN44369309	NA	PDT002565332.1	Zambia: Central	SRR31063729	not collected	Zambia	East Africa		Central	Clinical (Human)	Human	Clinical	2024
GCA_046693425.1	SAMN44369314	NA	PDT002565327.1	Zambia: Central	SRR31063724	not collected	Zambia	East Africa		Central	Clinical (Human)	Human	Clinical	2024
GCA_046693465.1	SAMN44369117	NA	PDT002565326.1	Zambia: Lusaka	SRR31063723	not collected	Zambia	East Africa		Lusaka	Clinical (Human)	Human	Clinical	2023
GCA_046693525.1	SAMN44369315	NA	PDT002565324.1	Zambia: Central	SRR31063721	not collected	Zambia	East Africa		Central	Clinical (Human)	Human	Clinical	2024
GCA_046693555.1	SAMN44369318	NA	PDT002565321.1	Zambia: North-Western	SRR31063718	not collected	Zambia	East Africa		North-Western	Clinical (Human)	Human	Clinical	2024
GCA_046693585.1	SAMN44369320	NA	PDT002565319.1	Zambia: Western	SRR31063716	not collected	Zambia	East Africa		Western	Clinical (Human)	Human	Clinical	2024
GCA_046693625.1	SAMN44369154	NA	PDT002565318.1	Zambia: Lusaka	SRR31063715	not collected	Zambia	East Africa		Lusaka	Clinical (Human)	Human	Clinical	2024
GCA_046693685.1	SAMN44369119	NA	PDT002565317.1	Zambia: Lusaka	SRR31063714	not collected	Zambia	East Africa		Lusaka	Clinical (Human)	Human	Clinical	2023
GCA_046693705.1	SAMN44369155	NA	PDT002565316.1	Zambia: Lusaka	SRR31063713	not collected	Zambia	East Africa		Lusaka	Clinical (Human)	Human	Clinical	2024
GCA_046693745.1	SAMN44369161	NA	PDT002565310.1	Zambia: Lusaka	SRR31063707	not collected	Zambia	East Africa		Lusaka	Clinical (Human)	Human	Clinical	2024
GCA_046693785.1	SAMN44369163	NA	PDT002565308.1	Zambia: Lusaka	SRR31063705	not collected	Zambia	East Africa		Lusaka	Clinical (Human)	Human	Clinical	2023
GCA_046693845.1	SAMN44369164	NA	PDT002565307.1	Zambia: Lusaka	SRR31063704	not collected	Zambia	East Africa		Lusaka	Clinical (Human)	Human	Clinical	2023
GCA_046693865.1	SAMN44369120	NA	PDT002565306.1	Zambia: Lusaka	SRR31063703	not collected	Zambia	East Africa		Lusaka	Clinical (Human)	Human	Clinical	2023
GCA_046693885.1	SAMN44369167	NA	PDT002565303.1	Zambia: Lusaka	SRR31063700	not collected	Zambia	East Africa		Lusaka	Clinical (Human)	Human	Clinical	2023
GCA_046693985.1	SAMN44369168	NA	PDT002565302.1	Zambia: Central	SRR31063699	not collected	Zambia	East Africa		Central	Clinical (Human)	Human	Clinical	2024
GCA_046694005.1	SAMN44369173	NA	PDT002565297.1	Zambia: Lusaka	SRR31063694	not collected	Zambia	East Africa		Lusaka	Clinical (Human)	Human	Clinical	2023
GCA_046694025.1	SAMN44369169	NA	PDT002565301.1	Zambia: Lusaka	SRR31063698	not collected	Zambia	East Africa		Lusaka	Clinical (Human)	Human	Clinical	2023
GCA_046694125.1	SAMN44369170	NA	PDT002565300.1	Zambia: Lusaka	SRR31063697	not collected	Zambia	East Africa		Lusaka	Clinical (Human)	Human	Clinical	2024
GCA_046694825.1	SAMN44369162	NA	PDT002565309.1	Zambia: Lusaka	SRR31063706	not collected	Zambia	East Africa		Lusaka	Clinical (Human)	Human	Clinical	2023
GCA_046694845.1	SAMN44369158	NA	PDT002565313.1	Zambia: Lusaka	SRR31063710	not collected	Zambia	East Africa		Lusaka	Clinical (Human)	Human	Clinical	2024
GCA_046694865.1	SAMN44369157	NA	PDT002565314.1	Zambia: Lusaka	SRR31063711	not collected	Zambia	East Africa		Lusaka	Clinical (Human)	Human	Clinical	2024
GCA_046694925.1	SAMN44369159	NA	PDT002565312.1	Zambia: Luapula	SRR31063709	not collected	Zambia	East Africa		Luapula	Clinical (Human)	Human	Clinical	2023
GCA_046694965.1	SAMN44369160	NA	PDT002565311.1	Zambia: Lusaka	SRR31063708	not collected	Zambia	East Africa		Lusaka	Clinical (Human)	Human	Clinical	2024
GCA_046695025.1	SAMN44369166	NA	PDT002565304.1	Zambia: Lusaka	SRR31063701	not collected	Zambia	East Africa		Lusaka	Clinical (Human)	Human	Clinical	2024
GCA_046695045.1	SAMN44369171	NA	PDT002565299.1	Zambia: Lusaka	SRR31063696	not collected	Zambia	East Africa		Lusaka	Clinical (Human)	Human	Clinical	2023
GCA_046695105.1	SAMN44369172	NA	PDT002565298.1	Zambia: Lusaka	SRR31063695	not collected	Zambia	East Africa		Lusaka	Clinical (Human)	Human	Clinical	2023
GCA_046695125.1	SAMN44369174	NA	PDT002565296.1	Zambia: Lusaka	SRR31063693	not collected	Zambia	East Africa		Lusaka	Clinical (Human)	Human	Clinical	2024
GCA_046695185.1	SAMN44369127	NA	PDT002565294.1	Zambia: Lusaka	SRR31063691	not collected	Zambia	East Africa		Lusaka	Clinical (Human)	Human	Clinical	2023
GCA_046695225.1	SAMN44369235	NA	PDT002565293.1	Zambia: Luapula	SRR31063690	not collected	Zambia	East Africa		Luapula	Clinical (Human)	Human	Clinical	2023
GCA_046695245.1	SAMN44369121	NA	PDT002565295.1	Zambia: Lusaka	SRR31063692	not collected	Zambia	East Africa		Lusaka	Clinical (Human)	Human	Clinical	2024
GCA_046695305.1	SAMN44369236	NA	PDT002565292.1	Zambia: Southern	SRR31063689	not collected	Zambia	East Africa		Southern	Clinical (Human)	Human	Clinical	2024
GCA_046695385.1	SAMN44369238	NA	PDT002565290.1	Zambia: Southern	SRR31063687	not collected	Zambia	East Africa		Southern	Clinical (Human)	Human	Clinical	2024
GCA_046695405.1	SAMN44369239	NA	PDT002565289.1	Zambia: Copperbelt	SRR31063686	not collected	Zambia	East Africa		Copperbelt	Clinical (Human)	Human	Clinical	2024
GCA_046695445.1	SAMN44369240	NA	PDT002565288.1	Zambia: Copperbelt	SRR31063685	not collected	Zambia	East Africa		Copperbelt	Clinical (Human)	Human	Clinical	2024
GCA_046695465.1	SAMN44369237	NA	PDT002565291.1	Zambia: Southern	SRR31063688	not collected	Zambia	East Africa		Southern	Clinical (Human)	Human	Clinical	2024
GCA_046695545.1	SAMN44369241	NA	PDT002565287.1	Zambia: Copperbelt	SRR31063684	not collected	Zambia	East Africa		Copperbelt	Clinical (Human)	Human	Clinical	2024
GCA_046695585.1	SAMN44369243	NA	PDT002565285.1	Zambia: Copperbelt	SRR31063682	not collected	Zambia	East Africa		Copperbelt	Clinical (Human)	Human	Clinical	2024
GCA_046695625.1	SAMN44369244	NA	PDT002565284.1	Zambia: Copperbelt	SRR31063681	not collected	Zambia	East Africa		Copperbelt	Clinical (Human)	Human	Clinical	2024
GCA_046695645.1	SAMN44369128	NA	PDT002565283.1	Zambia: Lusaka	SRR31063680	not collected	Zambia	East Africa		Lusaka	Clinical (Human)	Human	Clinical	2024
GCA_046695665.1	SAMN44369245	NA	PDT002565282.1	Zambia: Copperbelt	SRR31063679	not collected	Zambia	East Africa		Copperbelt	Clinical (Human)	Human	Clinical	2024
GCA_046695745.1	SAMN44369246	NA	PDT002565281.1	Zambia: Copperbelt	SRR31063678	not collected	Zambia	East Africa		Copperbelt	Clinical (Human)	Human	Clinical	2024
GCA_046695765.1	SAMN44369247	NA	PDT002565280.1	Zambia: Copperbelt	SRR31063677	not collected	Zambia	East Africa		Copperbelt	Clinical (Human)	Human	Clinical	2024
GCA_046695825.1	SAMN44369249	NA	PDT002565278.1	Zambia: Central	SRR31063675	not collected	Zambia	East Africa		Central	Clinical (Human)	Human	Clinical	2023
GCA_046695885.1	SAMN44369248	NA	PDT002565279.1	Zambia: Copperbelt	SRR31063676	not collected	Zambia	East Africa		Copperbelt	Clinical (Human)	Human	Clinical	2024
GCA_046695925.1	SAMN44369250	NA	PDT002565277.1	Zambia: Central	SRR31063674	not collected	Zambia	East Africa		Central	Clinical (Human)	Human	Clinical	2024
GCA_046695945.1	SAMN44369251	NA	PDT002565276.1	Zambia: Central	SRR31063673	not collected	Zambia	East Africa		Central	Clinical (Human)	Human	Clinical	2024
GCA_046696015.1	SAMN44369252	NA	PDT002565275.1	Zambia: Central	SRR31063672	not collected	Zambia	East Africa		Central	Clinical (Human)	Human	Clinical	2024
GCA_046696065.1	SAMN44369129	NA	PDT002565272.1	Zambia: Lusaka	SRR31063669	not collected	Zambia	East Africa		Lusaka	Clinical (Human)	Human	Clinical	2024
GCA_046696075.1	SAMN44369253	NA	PDT002565274.1	Zambia: Central	SRR31063671	not collected	Zambia	East Africa		Central	Clinical (Human)	Human	Clinical	2024
GCA_046696125.1	SAMN44369254	NA	PDT002565273.1	Zambia: Central	SRR31063670	not collected	Zambia	East Africa		Central	Clinical (Human)	Human	Clinical	2024
GCA_046696185.1	SAMN44369255	NA	PDT002565271.1	Zambia: Central	SRR31063668	not collected	Zambia	East Africa		Central	Clinical (Human)	Human	Clinical	2024
GCA_046696205.1	SAMN44369178	NA	PDT002565267.1	Zambia: Lusaka	SRR31063664	not collected	Zambia	East Africa		Lusaka	Clinical (Human)	Human	Clinical	2024
GCA_046696265.1	SAMN44369175	NA	PDT002565270.1	Zambia: Lusaka	SRR31063667	not collected	Zambia	East Africa		Lusaka	Clinical (Human)	Human	Clinical	2023
GCA_046696275.1	SAMN44369177	NA	PDT002565268.1	Zambia: Lusaka	SRR31063665	not collected	Zambia	East Africa		Lusaka	Clinical (Human)	Human	Clinical	2024
GCA_046696325.1	SAMN44369176	NA	PDT002565269.1	Zambia: Lusaka	SRR31063666	not collected	Zambia	East Africa		Lusaka	Clinical (Human)	Human	Clinical	2023
GCA_046696385.1	SAMN44369179	NA	PDT002565266.1	Zambia: Lusaka	SRR31063663	not collected	Zambia	East Africa		Lusaka	Clinical (Human)	Human	Clinical	2024
GCA_046696405.1	SAMN44369181	NA	PDT002565264.1	Zambia: Lusaka	SRR31063661	not collected	Zambia	East Africa		Lusaka	Clinical (Human)	Human	Clinical	2024
GCA_046696465.1	SAMN44369189	NA	PDT002565255.1	Zambia: Lusaka	SRR31063652	not collected	Zambia	East Africa		Lusaka	Clinical (Human)	Human	Clinical	2023
GCA_046696485.1	SAMN44369191	NA	PDT002565253.1	Zambia: Lusaka	SRR31063650	not collected	Zambia	East Africa		Lusaka	Clinical (Human)	Human	Clinical	2024
GCA_046696505.1	SAMN44369193	NA	PDT002565251.1	Zambia: Lusaka	SRR31063648	not collected	Zambia	East Africa		Lusaka	Clinical (Human)	Human	Clinical	2024
GCA_046696545.1	SAMN44369190	NA	PDT002565254.1	Zambia: Lusaka	SRR31063651	not collected	Zambia	East Africa		Lusaka	Clinical (Human)	Human	Clinical	2024
GCA_046696605.1	SAMN44369195	NA	PDT002565248.1	Zambia: Lusaka	SRR31063645	not collected	Zambia	East Africa		Lusaka	Clinical (Human)	Human	Clinical	2024
GCA_046696665.1	SAMN44369196	NA	PDT002565247.1	Zambia: Lusaka	SRR31063644	not collected	Zambia	East Africa		Lusaka	Clinical (Human)	Human	Clinical	2023
GCA_046697525.1	SAMN44369182	NA	PDT002565263.1	Zambia: Lusaka	SRR31063660	not collected	Zambia	East Africa		Lusaka	Clinical (Human)	Human	Clinical	2024
GCA_046697545.1	SAMN44369183	NA	PDT002565262.1	Zambia: Lusaka	SRR31063659	not collected	Zambia	East Africa		Lusaka	Clinical (Human)	Human	Clinical	2024
GCA_046697565.1	SAMN44369122	NA	PDT002565260.1	Zambia: Lusaka	SRR31063657	not collected	Zambia	East Africa		Lusaka	Clinical (Human)	Human	Clinical	2023
GCA_046697585.1	SAMN44369185	NA	PDT002565259.1	Zambia: Lusaka	SRR31063656	not collected	Zambia	East Africa		Lusaka	Clinical (Human)	Human	Clinical	2024
GCA_046697605.1	SAMN44369184	NA	PDT002565261.1	Zambia: Central	SRR31063658	not collected	Zambia	East Africa		Central	Clinical (Human)	Human	Clinical	2024
GCA_046697705.1	SAMN44369186	NA	PDT002565258.1	Zambia: Lusaka	SRR31063655	not collected	Zambia	East Africa		Lusaka	Clinical (Human)	Human	Clinical	2024
GCA_046697745.1	SAMN44369192	NA	PDT002565252.1	Zambia: Lusaka	SRR31063649	not collected	Zambia	East Africa		Lusaka	Clinical (Human)	Human	Clinical	2023
GCA_046697765.1	SAMN44369187	NA	PDT002565257.1	Zambia: Lusaka	SRR31063654	not collected	Zambia	East Africa		Lusaka	Clinical (Human)	Human	Clinical	2024
GCA_046697785.1	SAMN44369188	NA	PDT002565256.1	Zambia: Lusaka	SRR31063653	not collected	Zambia	East Africa		Lusaka	Clinical (Human)	Human	Clinical	2024
GCA_046697805.1	SAMN44369194	NA	PDT002565250.1	Zambia: Lusaka	SRR31063647	not collected	Zambia	East Africa		Lusaka	Clinical (Human)	Human	Clinical	2023
GCA_046697925.1	SAMN44369257	NA	PDT002565245.1	Zambia: Central	SRR31063642	not collected	Zambia	East Africa		Central	Clinical (Human)	Human	Clinical	2024
GCA_046697945.1	SAMN44369256	NA	PDT002565246.1	Zambia: Central	SRR31063643	not collected	Zambia	East Africa		Central	Clinical (Human)	Human	Clinical	2024
GCA_046697975.1	SAMN44369258	NA	PDT002565244.1	Zambia: Central	SRR31063641	not collected	Zambia	East Africa		Central	Clinical (Human)	Human	Clinical	2023
GCA_046697995.1	SAMN44369259	NA	PDT002565243.1	Zambia: Central	SRR31063640	not collected	Zambia	East Africa		Central	Clinical (Human)	Human	Clinical	2023
GCA_046698025.1	SAMN44369260	NA	PDT002565242.1	Zambia: Central	SRR31063639	not collected	Zambia	East Africa		Central	Clinical (Human)	Human	Clinical	2023
GCA_046698125.1	SAMN44369261	NA	PDT002565241.1	Zambia: Northern	SRR31063638	not collected	Zambia	East Africa		Northern	Clinical (Human)	Human	Clinical	2023
GCA_046698145.1	SAMN44369262	NA	PDT002565240.1	Zambia: Northern	SRR31063637	not collected	Zambia	East Africa		Northern	Clinical (Human)	Human	Clinical	2023
GCA_046698205.1	SAMN44369263	NA	PDT002565239.1	Zambia: Northern	SRR31063636	not collected	Zambia	East Africa		Northern	Clinical (Human)	Human	Clinical	2023
GCA_046698245.1	SAMN44369130	NA	PDT002565237.1	Zambia: Lusaka	SRR31063634	not collected	Zambia	East Africa		Lusaka	Clinical (Human)	Human	Clinical	2023
GCA_046698255.1	SAMN44369264	NA	PDT002565238.1	Zambia: Northern	SRR31063635	not collected	Zambia	East Africa		Northern	Clinical (Human)	Human	Clinical	2023
GCA_046698325.1	SAMN44369265	NA	PDT002565236.1	Zambia: Northern	SRR31063633	not collected	Zambia	East Africa		Northern	Clinical (Human)	Human	Clinical	2023
GCA_046698345.1	SAMN44369266	NA	PDT002565235.1	Zambia: Southern	SRR31063632	not collected	Zambia	East Africa		Southern	Clinical (Human)	Human	Clinical	2024
GCA_046698385.1	SAMN44369268	NA	PDT002565233.1	Zambia: Eastern	SRR31063630	not collected	Zambia	East Africa		Eastern	Clinical (Human)	Human	Clinical	2024
GCA_046698405.1	SAMN44369267	NA	PDT002565234.1	Zambia: Luapula	SRR31063631	not collected	Zambia	East Africa		Luapula	Clinical (Human)	Human	Clinical	2023
GCA_046698445.1	SAMN44369269	NA	PDT002565232.1	Zambia: Northern	SRR31063629	not collected	Zambia	East Africa		Northern	Clinical (Human)	Human	Clinical	2023
GCA_046698505.1	SAMN44369270	NA	PDT002565231.1	Zambia: Eastern	SRR31063628	not collected	Zambia	East Africa		Eastern	Clinical (Human)	Human	Clinical	2024
GCA_046698565.1	SAMN44369271	NA	PDT002565230.1	Zambia: Northern	SRR31063627	not collected	Zambia	East Africa		Northern	Clinical (Human)	Human	Clinical	2023
GCA_046698665.1	SAMN44369272	NA	PDT002565229.1	Zambia: Northern	SRR31063626	not collected	Zambia	East Africa		Northern	Clinical (Human)	Human	Clinical	2024
GCA_046698685.1	SAMN44369274	NA	PDT002565227.1	Zambia: Eastern	SRR31063624	not collected	Zambia	East Africa		Eastern	Clinical (Human)	Human	Clinical	2024
GCA_046698695.1	SAMN44369277	NA	PDT002565223.1	Zambia: Northern	SRR31063620	not collected	Zambia	East Africa		Northern	Clinical (Human)	Human	Clinical	2024
GCA_046698765.1	SAMN44369131	NA	PDT002565226.1	Zambia: Lusaka	SRR31063623	not collected	Zambia	East Africa		Lusaka	Clinical (Human)	Human	Clinical	2024
GCA_046698865.1	SAMN44369321	NA	PDT002565222.1	Zambia: North-Western	SRR31063619	not collected	Zambia	East Africa		North-Western	Clinical (Human)	Human	Clinical	2023
GCA_046698885.1	SAMN44369322	NA	PDT002565221.1	Zambia: Western	SRR31063618	not collected	Zambia	East Africa		Western	Clinical (Human)	Human	Clinical	2024
GCA_046698905.1	SAMN44369325	NA	PDT002565217.1	Zambia: Western	SRR31063614	not collected	Zambia	East Africa		Western	Clinical (Human)	Human	Clinical	2024
GCA_046698925.1	SAMN44369323	NA	PDT002565220.1	Zambia: Western	SRR31063617	not collected	Zambia	East Africa		Western	Clinical (Human)	Human	Clinical	2024
GCA_046698985.1	SAMN44369327	NA	PDT002565215.1	Zambia: Western	SRR31063612	not collected	Zambia	East Africa		Western	Clinical (Human)	Human	Clinical	2024
GCA_046699005.1	SAMN44369324	NA	PDT002565219.1	Zambia: Western	SRR31063616	not collected	Zambia	East Africa		Western	Clinical (Human)	Human	Clinical	2024
GCA_046699085.1	SAMN44369328	NA	PDT002565214.1	Zambia: Western	SRR31063611	not collected	Zambia	East Africa		Western	Clinical (Human)	Human	Clinical	2024
GCA_046699145.1	SAMN44369336	NA	PDT002565205.1	Zambia: Western	SRR31063602	not collected	Zambia	East Africa		Western	Clinical (Human)	Human	Clinical	2024
GCA_046699165.1	SAMN44369329	NA	PDT002565213.1	Zambia: Western	SRR31063610	not collected	Zambia	East Africa		Western	Clinical (Human)	Human	Clinical	2024
GCA_046700325.1	SAMN44369331	NA	PDT002565211.1	Zambia: North-Western	SRR31063608	not collected	Zambia	East Africa		North-Western	Clinical (Human)	Human	Clinical	2024
GCA_046700335.1	SAMN44369333	NA	PDT002565209.1	Zambia: North-Western	SRR31063606	not collected	Zambia	East Africa		North-Western	Clinical (Human)	Human	Clinical	2024
GCA_046700365.1	SAMN44369332	NA	PDT002565210.1	Zambia: North-Western	SRR31063607	not collected	Zambia	East Africa		North-Western	Clinical (Human)	Human	Clinical	2024
GCA_046700385.1	SAMN44369137	NA	PDT002565207.1	Zambia: Lusaka	SRR31063604	not collected	Zambia	East Africa		Lusaka	Clinical (Human)	Human	Clinical	2023
GCA_046700425.1	SAMN44369330	NA	PDT002565212.1	Zambia: Western	SRR31063609	not collected	Zambia	East Africa		Western	Clinical (Human)	Human	Clinical	2024
GCA_046700525.1	SAMN44369339	NA	PDT002565202.1	Zambia: Copperbelt	SRR31063599	not collected	Zambia	East Africa		Copperbelt	Clinical (Human)	Human	Clinical	2024
GCA_046700545.1	SAMN44369335	NA	PDT002565206.1	Zambia: North-Western	SRR31063603	not collected	Zambia	East Africa		North-Western	Clinical (Human)	Human	Clinical	2024
GCA_046700565.1	SAMN44369337	NA	PDT002565204.1	Zambia: Copperbelt	SRR31063601	not collected	Zambia	East Africa		Copperbelt	Clinical (Human)	Human	Clinical	2024
GCA_046700585.1	SAMN44369341	NA	PDT002565200.1	Zambia: Copperbelt	SRR31063597	not collected	Zambia	East Africa		Copperbelt	Clinical (Human)	Human	Clinical	2024
GCA_046700605.1	SAMN44369342	NA	PDT002565199.1	Zambia: Copperbelt	SRR31063596	not collected	Zambia	East Africa		Copperbelt	Clinical (Human)	Human	Clinical	2024
GCA_046700725.1	SAMN44369199	NA	PDT002565196.1	Zambia: Luapula	SRR31063593	not collected	Zambia	East Africa		Luapula	Clinical (Human)	Human	Clinical	2023
GCA_046700745.1	SAMN44369198	NA	PDT002565197.1	Zambia: Northern	SRR31063594	not collected	Zambia	East Africa		Northern	Clinical (Human)	Human	Clinical	2023
GCA_046700765.1	SAMN44369203	NA	PDT002565192.1	Zambia: Eastern	SRR31063589	not collected	Zambia	East Africa		Eastern	Clinical (Human)	Human	Clinical	2023
GCA_046700785.1	SAMN44369200	NA	PDT002565195.1	Zambia: Northern	SRR31063592	not collected	Zambia	East Africa		Northern	Clinical (Human)	Human	Clinical	2023
GCA_046700825.1	SAMN44369204	NA	PDT002565191.1	Zambia: Eastern	SRR31063588	not collected	Zambia	East Africa		Eastern	Clinical (Human)	Human	Clinical	2023
GCA_046700845.1	SAMN44369205	NA	PDT002565189.1	Zambia: Eastern	SRR31063586	not collected	Zambia	East Africa		Eastern	Clinical (Human)	Human	Clinical	2024
GCA_046700865.1	SAMN44369124	NA	PDT002565190.1	Zambia: Lusaka	SRR31063587	not collected	Zambia	East Africa		Lusaka	Clinical (Human)	Human	Clinical	2024
GCA_046700885.1	SAMN44369207	NA	PDT002565187.1	Zambia: Lusaka	SRR31063584	not collected	Zambia	East Africa		Lusaka	Clinical (Human)	Human	Clinical	2024
GCA_046700905.1	SAMN44369206	NA	PDT002565188.1	Zambia: Eastern	SRR31063585	not collected	Zambia	East Africa		Eastern	Clinical (Human)	Human	Clinical	2024
GCA_046701005.1	SAMN44369208	NA	PDT002565186.1	Zambia: Eastern	SRR31063583	not collected	Zambia	East Africa		Eastern	Clinical (Human)	Human	Clinical	2024
GCA_046701045.1	SAMN44369210	NA	PDT002565184.1	Zambia: Northern	SRR31063581	not collected	Zambia	East Africa		Northern	Clinical (Human)	Human	Clinical	2023
GCA_046701065.1	SAMN44369209	NA	PDT002565185.1	Zambia: Northern	SRR31063582	not collected	Zambia	East Africa		Northern	Clinical (Human)	Human	Clinical	2023
GCA_046701085.1	SAMN44369211	NA	PDT002565183.1	Zambia: Eastern	SRR31063580	not collected	Zambia	East Africa		Eastern	Clinical (Human)	Human	Clinical	2023
GCA_046701125.1	SAMN44369212	NA	PDT002565182.1	Zambia: Eastern	SRR31063579	not collected	Zambia	East Africa		Eastern	Clinical (Human)	Human	Clinical	2023
GCA_046701135.1	SAMN44369214	NA	PDT002565180.1	Zambia: Northern	SRR31063577	not collected	Zambia	East Africa		Northern	Clinical (Human)	Human	Clinical	2023
GCA_046701245.1	SAMN44369280	NA	PDT002565177.1	Zambia: Eastern	SRR31063574	not collected	Zambia	East Africa		Eastern	Clinical (Human)	Human	Clinical	2024
GCA_046701265.1	SAMN44369282	NA	PDT002565175.1	Zambia: Eastern	SRR31063572	not collected	Zambia	East Africa		Eastern	Clinical (Human)	Human	Clinical	2024
GCA_046701285.1	SAMN44369278	NA	PDT002565179.1	Zambia: Northern	SRR31063576	not collected	Zambia	East Africa		Northern	Clinical (Human)	Human	Clinical	2024
GCA_046701305.1	SAMN44369283	NA	PDT002565174.1	Zambia: Lusaka	SRR31063571	not collected	Zambia	East Africa		Lusaka	Clinical (Human)	Human	Clinical	2024
GCA_046701325.1	SAMN44369284	NA	PDT002565173.1	Zambia: Eastern	SRR31063570	not collected	Zambia	East Africa		Eastern	Clinical (Human)	Human	Clinical	2023
GCA_046701405.1	SAMN44369286	NA	PDT002565170.1	Zambia: Southern	SRR31063567	not collected	Zambia	East Africa		Southern	Clinical (Human)	Human	Clinical	2024
GCA_046701445.1	SAMN44369132	NA	PDT002565172.1	Zambia: Lusaka	SRR31063569	not collected	Zambia	East Africa		Lusaka	Clinical (Human)	Human	Clinical	2023
GCA_046701465.1	SAMN44369285	NA	PDT002565171.1	Zambia: Eastern	SRR31063568	not collected	Zambia	East Africa		Eastern	Clinical (Human)	Human	Clinical	2024
GCA_046701505.1	SAMN44369287	NA	PDT002565169.1	Zambia: Southern	SRR31063566	not collected	Zambia	East Africa		Southern	Clinical (Human)	Human	Clinical	2024
GCA_046701525.1	SAMN44369288	NA	PDT002565168.1	Zambia: Northern	SRR31063565	not collected	Zambia	East Africa		Northern	Clinical (Human)	Human	Clinical	2023
GCA_046701585.1	SAMN44369289	NA	PDT002565167.1	Zambia: Northern	SRR31063564	not collected	Zambia	East Africa		Northern	Clinical (Human)	Human	Clinical	2023
GCA_046701625.1	SAMN44369291	NA	PDT002565165.1	Zambia: Eastern	SRR31063562	not collected	Zambia	East Africa		Eastern	Clinical (Human)	Human	Clinical	2024
GCA_046701685.1	SAMN44369293	NA	PDT002565163.1	Zambia: Eastern	SRR31063560	not collected	Zambia	East Africa		Eastern	Clinical (Human)	Human	Clinical	2024
GCA_046701705.1	SAMN44369292	NA	PDT002565164.1	Zambia: Eastern	SRR31063561	not collected	Zambia	East Africa		Eastern	Clinical (Human)	Human	Clinical	2024
GCA_046701725.1	SAMN44369290	NA	PDT002565166.1	Zambia: Eastern	SRR31063563	not collected	Zambia	East Africa		Eastern	Clinical (Human)	Human	Clinical	2024
GCA_046701785.1	SAMN44369294	NA	PDT002565162.1	Zambia: Southern	SRR31063559	not collected	Zambia	East Africa		Southern	Clinical (Human)	Human	Clinical	2024
GCA_046701815.1	SAMN44369295	NA	PDT002565160.1	Zambia: Luapula	SRR31063557	not collected	Zambia	East Africa		Luapula	Clinical (Human)	Human	Clinical	2023
GCA_046701885.1	SAMN44369298	NA	PDT002565157.1	Zambia: Northern	SRR31063554	not collected	Zambia	East Africa		Northern	Clinical (Human)	Human	Clinical	2023
GCA_046701905.1	SAMN44369296	NA	PDT002565159.1	Zambia: Eastern	SRR31063556	not collected	Zambia	East Africa		Eastern	Clinical (Human)	Human	Clinical	2024
GCA_046701945.1	SAMN44369297	NA	PDT002565158.1	Zambia: Eastern	SRR31063555	not collected	Zambia	East Africa		Eastern	Clinical (Human)	Human	Clinical	2024
GCA_046702005.1	SAMN44369343	NA	PDT002565155.1	Zambia: Copperbelt	SRR31063552	not collected	Zambia	East Africa		Copperbelt	Clinical (Human)	Human	Clinical	2024
GCA_046702025.1	SAMN44369344	NA	PDT002565154.1	Zambia: Copperbelt	SRR31063551	not collected	Zambia	East Africa		Copperbelt	Clinical (Human)	Human	Clinical	2024
GCA_046702065.1	SAMN44369345	NA	PDT002565152.1	Zambia: Copperbelt	SRR31063549	not collected	Zambia	East Africa		Copperbelt	Clinical (Human)	Human	Clinical	2024
GCA_046702145.1	SAMN44369138	NA	PDT002565153.1	Zambia: Lusaka	SRR31063550	not collected	Zambia	East Africa		Lusaka	Clinical (Human)	Human	Clinical	2024
GCA_046702185.1	SAMN44369346	NA	PDT002565151.1	Zambia: Copperbelt	SRR31063548	not collected	Zambia	East Africa		Copperbelt	Clinical (Human)	Human	Clinical	2024
GCA_046702205.1	SAMN44369347	NA	PDT002565150.1	Zambia: Copperbelt	SRR31063547	not collected	Zambia	East Africa		Copperbelt	Clinical (Human)	Human	Clinical	2024
GCA_046702225.1	SAMN44369348	NA	PDT002565149.1	Zambia: Copperbelt	SRR31063546	not collected	Zambia	East Africa		Copperbelt	Clinical (Human)	Human	Clinical	2024
GCA_046702285.1	SAMN44369349	NA	PDT002565148.1	Zambia: Copperbelt	SRR31063545	not collected	Zambia	East Africa		Copperbelt	Clinical (Human)	Human	Clinical	2024
GCA_046702365.1	SAMN44369139	NA	PDT002565147.1	Zambia: Lusaka	SRR31063544	not collected	Zambia	East Africa		Lusaka	Clinical (Human)	Human	Clinical	2024
GCA_046702385.1	SAMN44369140	NA	PDT002565146.1	Zambia: Lusaka	SRR31063543	not collected	Zambia	East Africa		Lusaka	Clinical (Human)	Human	Clinical	2023
GCA_046702405.1	SAMN44369141	NA	PDT002565145.1	Zambia: Lusaka	SRR31063542	not collected	Zambia	East Africa		Lusaka	Clinical (Human)	Human	Clinical	2024
GCA_046702445.1	SAMN44369142	NA	PDT002565144.1	Zambia: Lusaka	SRR31063541	not collected	Zambia	East Africa		Lusaka	Clinical (Human)	Human	Clinical	2024
GCA_046702505.1	SAMN44369143	NA	PDT002565143.1	Zambia: Central	SRR31063540	not collected	Zambia	East Africa		Central	Clinical (Human)	Human	Clinical	2024
GCA_046702565.1	SAMN44369145	NA	PDT002565140.1	Zambia: Central	SRR31063537	not collected	Zambia	East Africa		Central	Clinical (Human)	Human	Clinical	2024
GCA_046702585.1	SAMN44369144	NA	PDT002565142.1	Zambia: Lusaka	SRR31063539	not collected	Zambia	East Africa		Lusaka	Clinical (Human)	Human	Clinical	2024
GCA_046702645.1	SAMN44369148	NA	PDT002565137.1	Zambia: Lusaka	SRR31063534	not collected	Zambia	East Africa		Lusaka	Clinical (Human)	Human	Clinical	2024
GCA_046702665.1	SAMN44369146	NA	PDT002565139.1	Zambia: Lusaka	SRR31063536	not collected	Zambia	East Africa		Lusaka	Clinical (Human)	Human	Clinical	2023
GCA_046702695.1	SAMN44369147	NA	PDT002565138.1	Zambia: Lusaka	SRR31063535	not collected	Zambia	East Africa		Lusaka	Clinical (Human)	Human	Clinical	2024
GCA_046702735.1	SAMN44369149	NA	PDT002565136.1	Zambia: Lusaka	SRR31063533	not collected	Zambia	East Africa		Lusaka	Clinical (Human)	Human	Clinical	2024
GCA_046702775.1	SAMN44369150	NA	PDT002565135.1	Zambia: Lusaka	SRR31063532	not collected	Zambia	East Africa		Lusaka	Clinical (Human)	Human	Clinical	2024
GCA_046702845.1	SAMN44369151	NA	PDT002565134.1	Zambia: Lusaka	SRR31063531	not collected	Zambia	East Africa		Lusaka	Clinical (Human)	Human	Clinical	2024
GCA_046702865.1	SAMN44369152	NA	PDT002565133.1	Zambia: Lusaka	SRR31063530	not collected	Zambia	East Africa		Lusaka	Clinical (Human)	Human	Clinical	2023
GCA_046702925.1	SAMN44369317	NA	PDT002565322.1	Zambia: North-Western	SRR31063719	not collected	Zambia	East Africa		North-Western	Clinical (Human)	Human	Clinical	2024
GCA_046702955.1	SAMN44369153	NA	PDT002565132.1	Zambia: Lusaka	SRR31063529	not collected	Zambia	East Africa		Lusaka	Clinical (Human)	Human	Clinical	2024
GCA_046703005.1	SAMN43684702	NA	PDT002565130.1	Mozambique: Cabo Delgado	SRR31002848	not collected	Mozambique	East Africa		Cabo Delgado	Clinical (Human)	Human	Clinical	2023
GCA_046703025.1	SAMN43684711	NA	PDT002565129.1	Mozambique: Tete	SRR31002847	not collected	Mozambique	East Africa		Tete	Clinical (Human)	Human	Clinical	2023
GCA_046703045.1	SAMN43684712	NA	PDT002565128.1	Mozambique: Nassa	SRR31002846	not collected	Mozambique	East Africa		Nassa	Clinical (Human)	Human	Clinical	2023
GCA_046703125.1	SAMN43684713	NA	PDT002565127.1	Mozambique: Tete	SRR31002845	not collected	Mozambique	East Africa		Tete	Clinical (Human)	Human	Clinical	2023
GCA_046703185.1	SAMN43684715	NA	PDT002565126.1	Mozambique: Nassa	SRR31002844	not collected	Mozambique	East Africa		Nassa	Clinical (Human)	Human	Clinical	2023
GCA_046703205.1	SAMN43684703	NA	PDT002565120.1	Mozambique: Cabo Delgado	SRR31002838	not collected	Mozambique	East Africa		Cabo Delgado	Clinical (Human)	Human	Clinical	2023
GCA_046703225.1	SAMN43684719	NA	PDT002565122.1	Mozambique: Nassa	SRR31002840	not collected	Mozambique	East Africa		Nassa	Clinical (Human)	Human	Clinical	2023
GCA_046703265.1	SAMN43684716	NA	PDT002565125.1	Mozambique: Nassa	SRR31002843	not collected	Mozambique	East Africa		Nassa	Clinical (Human)	Human	Clinical	2023
GCA_046703285.1	SAMN43684722	NA	PDT002565118.1	Mozambique: Tete	SRR31002836	not collected	Mozambique	East Africa		Tete	Clinical (Human)	Human	Clinical	2023
GCA_046703385.1	SAMN43684723	NA	PDT002565117.1	Mozambique: Tete	SRR31002835	not collected	Mozambique	East Africa		Tete	Clinical (Human)	Human	Clinical	2023
GCA_046703405.1	SAMN43684725	NA	PDT002565115.1	Mozambique: Tete	SRR31002833	not collected	Mozambique	East Africa		Tete	Clinical (Human)	Human	Clinical	2023
GCA_046703425.1	SAMN43684726	NA	PDT002565114.1	Mozambique: Tete	SRR31002832	not collected	Mozambique	East Africa		Tete	Clinical (Human)	Human	Clinical	2023
GCA_046703485.1	SAMN43684728	NA	PDT002565112.1	Mozambique: Zambezia	SRR31002830	not collected	Mozambique	East Africa		Zambezia	Clinical (Human)	Human	Clinical	2023
GCA_046703505.1	SAMN43684730	NA	PDT002565110.1	Mozambique: Nampula	SRR31002828	not collected	Mozambique	East Africa		Nampula	Clinical (Human)	Human	Clinical	2023
GCA_046703565.1	SAMN43684704	NA	PDT002565109.1	Mozambique: Cabo Delgado	SRR31002827	not collected	Mozambique	East Africa		Cabo Delgado	Clinical (Human)	Human	Clinical	2023
GCA_046703585.1	SAMN43684705	NA	PDT002565105.1	Mozambique: Zambezia	SRR31002823	not collected	Mozambique	East Africa		Zambezia	Clinical (Human)	Human	Clinical	2023
GCA_046703625.1	SAMN43684706	NA	PDT002565104.1	Mozambique: Nampula	SRR31002822	not collected	Mozambique	East Africa		Nampula	Clinical (Human)	Human	Clinical	2023
GCA_046703685.1	SAMN43684710	NA	PDT002565100.1	Mozambique: Nampula	SRR31002818	not collected	Mozambique	East Africa		Nampula	Clinical (Human)	Human	Clinical	2023
GCA_046703725.1	SAMN43684708	NA	PDT002565102.1	Mozambique: Nampula	SRR31002820	not collected	Mozambique	East Africa		Nampula	Clinical (Human)	Human	Clinical	2023
GCA_046703765.1	SAMN43963756	NA	PDT002565099.1	Nigeria: Bayelsa	SRR30823489	not collected	Nigeria	West Africa		Bayelsa	Clinical (Human)	Human	Clinical	2021
GCA_046703785.1	SAMN43963757	NA	PDT002565098.1	Nigeria: Sokoto	SRR30823488	not collected	Nigeria	West Africa		Sokoto	Clinical (Human)	Human	Clinical	2021
GCA_046703805.1	SAMN43963857	NA	PDT002565095.1	Nigeria: Adamawa	SRR30823485	not collected	Nigeria	West Africa		Adamawa	Clinical (Human)	Human	Clinical	2018
GCA_046703845.1	SAMN43963766	NA	PDT002565097.1	Nigeria: Kano	SRR30823487	not collected	Nigeria	West Africa		Kano	Clinical (Human)	Human	Clinical	2021
GCA_046703905.1	SAMN43963858	NA	PDT002565094.1	Nigeria	SRR30823484	not collected	Nigeria	West Africa			Clinical (Human)	Human	Clinical	2018
GCA_046703925.1	SAMN43963859	NA	PDT002565093.1	Nigeria	SRR30823483	not collected	Nigeria	West Africa			Clinical (Human)	Human	Clinical	2018
GCA_046703985.1	SAMN43963860	NA	PDT002565092.1	Nigeria	SRR30823482	not collected	Nigeria	West Africa			Clinical (Human)	Human	Clinical	2018
GCA_046704005.1	SAMN43963862	NA	PDT002565090.1	Nigeria	SRR30823480	not collected	Nigeria	West Africa			Clinical (Human)	Human	Clinical	2018
GCA_046704015.1	SAMN43963863	NA	PDT002565089.1	Nigeria: Bayelsa	SRR30823479	not collected	Nigeria	West Africa		Bayelsa	Clinical (Human)	Human	Clinical	2019
GCA_046704065.1	SAMN43963781	NA	PDT002565074.1	Nigeria: Yobe	SRR30823464	not collected	Nigeria	West Africa		Yobe	Clinical (Human)	Human	Clinical	2022
GCA_046704105.1	SAMN43963780	NA	PDT002565075.1	Nigeria: Borno	SRR30823465	not collected	Nigeria	West Africa		Borno	Clinical (Human)	Human	Clinical	2022
GCA_046704185.1	SAMN43963782	NA	PDT002565073.1	Nigeria: Yobe	SRR30823463	not collected	Nigeria	West Africa		Yobe	Clinical (Human)	Human	Clinical	2022
GCA_046704205.1	SAMN43963785	NA	PDT002565070.1	Nigeria: Yobe	SRR30823460	not collected	Nigeria	West Africa		Yobe	Clinical (Human)	Human	Clinical	2022
GCA_046704225.1	SAMN43963786	NA	PDT002565068.1	Nigeria: Gombe	SRR30823458	not collected	Nigeria	West Africa		Gombe	Clinical (Human)	Human	Clinical	2022
GCA_046705045.1	SAMN43963864	NA	PDT002565088.1	Nigeria: Adamawa	SRR30823478	not collected	Nigeria	West Africa		Adamawa	Clinical (Human)	Human	Clinical	2019
GCA_046705085.1	SAMN43963866	NA	PDT002565085.1	Nigeria: Adamawa	SRR30823475	not collected	Nigeria	West Africa		Adamawa	Clinical (Human)	Human	Clinical	2019
GCA_046705165.1	SAMN43963865	NA	PDT002565087.1	Nigeria: Adamawa	SRR30823477	not collected	Nigeria	West Africa		Adamawa	Clinical (Human)	Human	Clinical	2019
GCA_046705185.1	SAMN43963868	NA	PDT002565083.1	Nigeria: Adamawa	SRR30823473	not collected	Nigeria	West Africa		Adamawa	Clinical (Human)	Human	Clinical	2019
GCA_046705215.1	SAMN43963871	NA	PDT002565080.1	Nigeria: Adamawa	SRR30823470	not collected	Nigeria	West Africa		Adamawa	Clinical (Human)	Human	Clinical	2019
GCA_046705245.1	SAMN43963869	NA	PDT002565082.1	Nigeria: Adamawa	SRR30823472	not collected	Nigeria	West Africa		Adamawa	Clinical (Human)	Human	Clinical	2019
GCA_046705305.1	SAMN43963873	NA	PDT002565078.1	Nigeria: Adamawa	SRR30823468	not collected	Nigeria	West Africa		Adamawa	Clinical (Human)	Human	Clinical	2019
GCA_046705345.1	SAMN43963787	NA	PDT002565067.1	Nigeria: Borno	SRR30823457	not collected	Nigeria	West Africa		Borno	Clinical (Human)	Human	Clinical	2022
GCA_046705385.1	SAMN43963874	NA	PDT002565077.1	Nigeria: Adamawa	SRR30823467	not collected	Nigeria	West Africa		Adamawa	Clinical (Human)	Human	Clinical	2019
GCA_046705405.1	SAMN43963789	NA	PDT002565065.1	Nigeria: Taraba	SRR30823455	not collected	Nigeria	West Africa		Taraba	Clinical (Human)	Human	Clinical	2022
GCA_046705425.1	SAMN43963783	NA	PDT002565072.1	Nigeria: Yobe	SRR30823462	not collected	Nigeria	West Africa		Yobe	Clinical (Human)	Human	Clinical	2022
GCA_046705485.1	SAMN43963791	NA	PDT002565063.1	Nigeria: Adamawa	SRR30823453	not collected	Nigeria	West Africa		Adamawa	Clinical (Human)	Human	Clinical	2022
GCA_046705505.1	SAMN43963794	NA	PDT002565060.1	Nigeria: Bauchi	SRR30823450	not collected	Nigeria	West Africa		Bauchi	Clinical (Human)	Human	Clinical	2022
GCA_046705525.1	SAMN43963792	NA	PDT002565062.1	Nigeria: Borno	SRR30823452	not collected	Nigeria	West Africa		Borno	Clinical (Human)	Human	Clinical	2022
GCA_046705585.1	SAMN43963760	NA	PDT002565058.1	Nigeria: Plateau	SRR30823448	not collected	Nigeria	West Africa		Plateau	Clinical (Human)	Human	Clinical	2021
GCA_046705665.1	SAMN43963795	NA	PDT002565059.1	Nigeria: Bauchi	SRR30823449	not collected	Nigeria	West Africa		Bauchi	Clinical (Human)	Human	Clinical	2022
GCA_046705685.1	SAMN43963796	NA	PDT002565057.1	Nigeria: Gombe	SRR30823447	not collected	Nigeria	West Africa		Gombe	Clinical (Human)	Human	Clinical	2022
GCA_046705705.1	SAMN43963798	NA	PDT002565055.1	Nigeria: Borno	SRR30823445	not collected	Nigeria	West Africa		Borno	Clinical (Human)	Human	Clinical	2022
GCA_046705725.1	SAMN43963797	NA	PDT002565056.1	Nigeria: Gombe	SRR30823446	not collected	Nigeria	West Africa		Gombe	Clinical (Human)	Human	Clinical	2022
GCA_046705805.1	SAMN43963800	NA	PDT002565053.1	Nigeria: Borno	SRR30823443	not collected	Nigeria	West Africa		Borno	Clinical (Human)	Human	Clinical	2022
GCA_046705885.1	SAMN43963768	NA	PDT002565051.1	Nigeria: Gombe	SRR30823441	not collected	Nigeria	West Africa		Gombe	Clinical (Human)	Human	Clinical	2021
GCA_046705905.1	SAMN43963879	NA	PDT002565047.1	Nigeria: Adamawa	SRR30823437	not collected	Nigeria	West Africa		Adamawa	Clinical (Human)	Human	Clinical	2019
GCA_046705925.1	SAMN43963878	NA	PDT002565048.1	Nigeria: Adamawa	SRR30823438	not collected	Nigeria	West Africa		Adamawa	Clinical (Human)	Human	Clinical	2019
GCA_046705945.1	SAMN43963876	NA	PDT002565050.1	Nigeria: Adamawa	SRR30823440	not collected	Nigeria	West Africa		Adamawa	Clinical (Human)	Human	Clinical	2019
GCA_046705965.1	SAMN43963880	NA	PDT002565046.1	Nigeria: Adamawa	SRR30823436	not collected	Nigeria	West Africa		Adamawa	Clinical (Human)	Human	Clinical	2019
GCA_046706065.1	SAMN43963883	NA	PDT002565043.1	Nigeria	SRR30823433	not collected	Nigeria	West Africa			Clinical (Human)	Human	Clinical	2019
GCA_046706085.1	SAMN43963881	NA	PDT002565045.1	Nigeria: Adamawa	SRR30823435	not collected	Nigeria	West Africa		Adamawa	Clinical (Human)	Human	Clinical	2019
GCA_046706125.1	SAMN43963884	NA	PDT002565042.1	Nigeria	SRR30823432	not collected	Nigeria	West Africa			Clinical (Human)	Human	Clinical	2019
GCA_046706165.1	SAMN43963885	NA	PDT002565041.1	Nigeria	SRR30823431	not collected	Nigeria	West Africa			Clinical (Human)	Human	Clinical	2019
GCA_046706205.1	SAMN43963769	NA	PDT002565040.1	Nigeria: Plateau	SRR30823430	not collected	Nigeria	West Africa		Plateau	Clinical (Human)	Human	Clinical	2021
GCA_046706225.1	SAMN43963772	NA	PDT002565036.1	Nigeria: Plateau	SRR30823426	not collected	Nigeria	West Africa		Plateau	Clinical (Human)	Human	Clinical	2021
GCA_046706255.1	SAMN43963770	NA	PDT002565038.1	Nigeria: Niger	SRR30823428	not collected	Nigeria	West Africa		Niger	Clinical (Human)	Human	Clinical	2021
GCA_046706265.1	SAMN43963773	NA	PDT002565035.1	Nigeria: Plateau	SRR30823425	not collected	Nigeria	West Africa		Plateau	Clinical (Human)	Human	Clinical	2021
GCA_046706385.1	SAMN43963775	NA	PDT002565033.1	Nigeria: Katsina	SRR30823423	not collected	Nigeria	West Africa		Katsina	Clinical (Human)	Human	Clinical	2022
GCA_046706405.1	SAMN43963776	NA	PDT002565031.1	Nigeria: Katsina	SRR30823421	not collected	Nigeria	West Africa		Katsina	Clinical (Human)	Human	Clinical	2022
GCA_046706425.1	SAMN43963779	NA	PDT002565028.1	Nigeria: Katsina	SRR30823418	not collected	Nigeria	West Africa		Katsina	Clinical (Human)	Human	Clinical	2022
GCA_046706445.1	SAMN43963777	NA	PDT002565030.1	Nigeria: Katsina	SRR30823420	not collected	Nigeria	West Africa		Katsina	Clinical (Human)	Human	Clinical	2022
GCA_046706465.1	SAMN43963802	NA	PDT002565027.1	Nigeria: Borno	SRR30823417	not collected	Nigeria	West Africa		Borno	Clinical (Human)	Human	Clinical	2022
GCA_046706495.1	SAMN43963761	NA	PDT002565023.1	Nigeria: Kano	SRR30823413	not collected	Nigeria	West Africa		Kano	Clinical (Human)	Human	Clinical	2021
GCA_046706565.1	SAMN43963803	NA	PDT002565026.1	Nigeria: Borno	SRR30823416	not collected	Nigeria	West Africa		Borno	Clinical (Human)	Human	Clinical	2022
GCA_046706625.1	SAMN43963808	NA	PDT002565020.1	Nigeria: Rivers	SRR30823410	not collected	Nigeria	West Africa		Rivers	Clinical (Human)	Human	Clinical	2024
GCA_046706645.1	SAMN43963807	NA	PDT002565021.1	Nigeria: Kebbi	SRR30823411	not collected	Nigeria	West Africa		Kebbi	Clinical (Human)	Human	Clinical	2021
GCA_046706665.1	SAMN43963810	NA	PDT002565018.1	Nigeria: Lagos	SRR30823408	not collected	Nigeria	West Africa		Lagos	Clinical (Human)	Human	Clinical	2024
GCA_046706705.1	SAMN43963812	NA	PDT002565016.1	Nigeria: Lagos	SRR30823406	not collected	Nigeria	West Africa		Lagos	Clinical (Human)	Human	Clinical	2024
GCA_046706765.1	SAMN43963813	NA	PDT002565015.1	Nigeria: Lagos	SRR30823405	not collected	Nigeria	West Africa		Lagos	Clinical (Human)	Human	Clinical	2024
GCA_046706805.1	SAMN43963762	NA	PDT002565012.1	Nigeria: Kano	SRR30823402	not collected	Nigeria	West Africa		Kano	Clinical (Human)	Human	Clinical	2021
GCA_046706835.1	SAMN43963817	NA	PDT002565010.1	Nigeria: Lagos	SRR30823400	not collected	Nigeria	West Africa		Lagos	Clinical (Human)	Human	Clinical	2024
GCA_046706865.1	SAMN43963816	NA	PDT002565011.1	Nigeria: Lagos	SRR30823401	not collected	Nigeria	West Africa		Lagos	Clinical (Human)	Human	Clinical	2024
GCA_046706925.1	SAMN43963819	NA	PDT002565008.1	Nigeria: Lagos	SRR30823398	not collected	Nigeria	West Africa		Lagos	Clinical (Human)	Human	Clinical	2024
GCA_046706985.1	SAMN43963820	NA	PDT002565007.1	Nigeria: Lagos	SRR30823397	not collected	Nigeria	West Africa		Lagos	Clinical (Human)	Human	Clinical	2024
GCA_046707025.1	SAMN43963821	NA	PDT002565006.1	Nigeria: Lagos	SRR30823396	not collected	Nigeria	West Africa		Lagos	Clinical (Human)	Human	Clinical	2024
GCA_046707045.1	SAMN43963763	NA	PDT002565001.1	Nigeria: Kano	SRR30823391	not collected	Nigeria	West Africa		Kano	Clinical (Human)	Human	Clinical	2021
GCA_046707065.1	SAMN43963825	NA	PDT002565002.1	Nigeria: Lagos	SRR30823392	not collected	Nigeria	West Africa		Lagos	Clinical (Human)	Human	Clinical	2024
GCA_046707085.1	SAMN43963826	NA	PDT002565000.1	Nigeria: Lagos	SRR30823390	not collected	Nigeria	West Africa		Lagos	Clinical (Human)	Human	Clinical	2024
GCA_046707165.1	SAMN43963828	NA	PDT002564998.1	Nigeria: Lagos	SRR30823388	not collected	Nigeria	West Africa		Lagos	Clinical (Human)	Human	Clinical	2024
GCA_046707725.1	SAMN43963829	NA	PDT002564997.1	Nigeria: Lagos	SRR30823387	not collected	Nigeria	West Africa		Lagos	Clinical (Human)	Human	Clinical	2024
GCA_046707745.1	SAMN43963824	NA	PDT002565003.1	Nigeria: Lagos	SRR30823393	not collected	Nigeria	West Africa		Lagos	Clinical (Human)	Human	Clinical	2024
GCA_046707785.1	SAMN43963833	NA	PDT002564993.1	Nigeria: Yobe	SRR30823383	not collected	Nigeria	West Africa		Yobe	Clinical (Human)	Human	Clinical	2018
GCA_046707825.1	SAMN43963831	NA	PDT002564995.1	Nigeria: Adamawa	SRR30823385	not collected	Nigeria	West Africa		Adamawa	Clinical (Human)	Human	Clinical	2018
GCA_046707845.1	SAMN43963830	NA	PDT002564996.1	Nigeria: Lagos	SRR30823386	not collected	Nigeria	West Africa		Lagos	Clinical (Human)	Human	Clinical	2024
GCA_046707925.1	SAMN43963837	NA	PDT002564988.1	Nigeria: Borno	SRR30823378	not collected	Nigeria	West Africa		Borno	Clinical (Human)	Human	Clinical	2018
GCA_046707945.1	SAMN43963835	NA	PDT002564991.1	Nigeria: Borno	SRR30823381	not collected	Nigeria	West Africa		Borno	Clinical (Human)	Human	Clinical	2018
GCA_046707985.1	SAMN43963838	NA	PDT002564987.1	Nigeria: Borno	SRR30823377	not collected	Nigeria	West Africa		Borno	Clinical (Human)	Human	Clinical	2018
GCA_046708035.1	SAMN43963839	NA	PDT002564986.1	Nigeria: Borno	SRR30823376	not collected	Nigeria	West Africa		Borno	Clinical (Human)	Human	Clinical	2018
GCA_046708085.1	SAMN43963840	NA	PDT002564985.1	Nigeria: Borno	SRR30823375	not collected	Nigeria	West Africa		Borno	Clinical (Human)	Human	Clinical	2018
GCA_046708125.1	SAMN43963842	NA	PDT002564983.1	Nigeria: Borno	SRR30823373	not collected	Nigeria	West Africa		Borno	Clinical (Human)	Human	Clinical	2018
GCA_046708155.1	SAMN43963843	NA	PDT002564982.1	Nigeria: Borno	SRR30823372	not collected	Nigeria	West Africa		Borno	Clinical (Human)	Human	Clinical	2018
GCA_046708205.1	SAMN43963845	NA	PDT002564980.1	Nigeria: Katsina	SRR30823370	not collected	Nigeria	West Africa		Katsina	Clinical (Human)	Human	Clinical	2018
GCA_046708225.1	SAMN43963844	NA	PDT002564981.1	Nigeria: Borno	SRR30823371	not collected	Nigeria	West Africa		Borno	Clinical (Human)	Human	Clinical	2018
GCA_046708305.1	SAMN43963846	NA	PDT002564978.1	Nigeria: Katsina	SRR30823368	not collected	Nigeria	West Africa		Katsina	Clinical (Human)	Human	Clinical	2018
GCA_046708325.1	SAMN43963847	NA	PDT002564977.1	Nigeria: Katsina	SRR30823367	not collected	Nigeria	West Africa		Katsina	Clinical (Human)	Human	Clinical	2018
GCA_046708345.1	SAMN43963848	NA	PDT002564976.1	Nigeria: Katsina	SRR30823366	not collected	Nigeria	West Africa		Katsina	Clinical (Human)	Human	Clinical	2018
GCA_046708385.1	SAMN43963849	NA	PDT002564975.1	Nigeria: Niger	SRR30823365	not collected	Nigeria	West Africa		Niger	Clinical (Human)	Human	Clinical	2018
GCA_046708425.1	SAMN43963851	NA	PDT002564973.1	Nigeria: Kebbi	SRR30823363	not collected	Nigeria	West Africa		Kebbi	Clinical (Human)	Human	Clinical	2018
GCA_046708485.1	SAMN43963852	NA	PDT002564972.1	Nigeria: Kebbi	SRR30823362	not collected	Nigeria	West Africa		Kebbi	Clinical (Human)	Human	Clinical	2018
GCA_046708495.1	SAMN43963854	NA	PDT002564970.1	Nigeria: Adamawa	SRR30823360	not collected	Nigeria	West Africa		Adamawa	Clinical (Human)	Human	Clinical	2018
GCA_046708525.1	SAMN43963853	NA	PDT002564971.1	Nigeria: Adamawa	SRR30823361	not collected	Nigeria	West Africa		Adamawa	Clinical (Human)	Human	Clinical	2018
GCA_046708585.1	SAMN43881780	NA	PDT002564968.1	Cameroon: Centre	SRR30765769	not collected	Cameroon	Central Africa		Centre	Clinical (Human)	Human	Clinical	2023
GCA_046708605.1	SAMN43881781	NA	PDT002564967.1	Cameroon: Centre	SRR30765768	not collected	Cameroon	Central Africa		Centre	Clinical (Human)	Human	Clinical	2023
GCA_046708685.1	SAMN43881795	NA	PDT002564961.1	Cameroon: Centre	SRR30765762	not collected	Cameroon	Central Africa		Centre	Clinical (Human)	Human	Clinical	2023
GCA_046708725.1	SAMN43881790	NA	PDT002564966.1	Cameroon: Centre	SRR30765767	not collected	Cameroon	Central Africa		Centre	Clinical (Human)	Human	Clinical	2023
GCA_046708745.1	SAMN43881791	NA	PDT002564965.1	Cameroon: Centre	SRR30765766	not collected	Cameroon	Central Africa		Centre	Clinical (Human)	Human	Clinical	2023
GCA_046708785.1	SAMN43881798	NA	PDT002564958.1	Cameroon: Littoral	SRR30765759	not collected	Cameroon	Central Africa		Littoral	Clinical (Human)	Human	Clinical	2023
GCA_046708845.1	SAMN43881796	NA	PDT002564960.1	Cameroon: Centre	SRR30765761	not collected	Cameroon	Central Africa		Centre	Clinical (Human)	Human	Clinical	2023
GCA_046708885.1	SAMN43881782	NA	PDT002564956.1	Cameroon: Centre	SRR30765757	not collected	Cameroon	Central Africa		Centre	Clinical (Human)	Human	Clinical	2023
GCA_046708945.1	SAMN43881802	NA	PDT002564953.1	Cameroon: Littoral	SRR30765754	not collected	Cameroon	Central Africa		Littoral	Clinical (Human)	Human	Clinical	2023
GCA_046708965.1	SAMN43881804	NA	PDT002564951.1	Cameroon: Littoral	SRR30765752	not collected	Cameroon	Central Africa		Littoral	Clinical (Human)	Human	Clinical	2023
GCA_046709035.1	SAMN43881807	NA	PDT002564948.1	Cameroon: Littoral	SRR30765749	not collected	Cameroon	Central Africa		Littoral	Clinical (Human)	Human	Clinical	2020
GCA_046709085.1	SAMN43881809	NA	PDT002564946.1	Cameroon: Centre	SRR30765747	not collected	Cameroon	Central Africa		Centre	Clinical (Human)	Human	Clinical	2023
GCA_046709105.1	SAMN43881806	NA	PDT002564949.1	Cameroon: Est	SRR30765750	not collected	Cameroon	Central Africa		Est	Clinical (Human)	Human	Clinical	2023
GCA_046709145.1	SAMN43881783	NA	PDT002564945.1	Cameroon: Centre	SRR30765746	not collected	Cameroon	Central Africa		Centre	Clinical (Human)	Human	Clinical	2023
GCA_046709185.1	SAMN43554726	NA	PDT002564915.1	Uganda: Kayunga	SRR30613510	not collected	Uganda	East Africa		Kayunga	Clinical (Human)	Human	Clinical	2023
GCA_046709225.1	SAMN43554729	NA	PDT002564913.1	Uganda: Kayunga	SRR30613508	not collected	Uganda	East Africa		Kayunga	Clinical (Human)	Human	Clinical	2023
GCA_046710385.1	SAMN43881787	NA	PDT002564940.1	Cameroon: Centre	SRR30765741	not collected	Cameroon	Central Africa		Centre	Clinical (Human)	Human	Clinical	2023
GCA_046710405.1	SAMN43881786	NA	PDT002564941.1	Cameroon: Centre	SRR30765742	not collected	Cameroon	Central Africa		Centre	Clinical (Human)	Human	Clinical	2023
GCA_046710415.1	SAMN43554717	NA	PDT002564937.1	Uganda: Isingiro	SRR30613532	not collected	Uganda	East Africa		Isingiro	Clinical (Human)	Human	Clinical	2019
GCA_046710465.1	SAMN43881784	NA	PDT002564943.1	Cameroon: Centre	SRR30765744	not collected	Cameroon	Central Africa		Centre	Clinical (Human)	Human	Clinical	2023
GCA_046710505.1	SAMN43881789	NA	PDT002564938.1	Cameroon: Centre	SRR30765739	not collected	Cameroon	Central Africa		Centre	Clinical (Human)	Human	Clinical	2023
GCA_046710565.1	SAMN43554751	NA	PDT002564933.1	Uganda: Kotido	SRR30613528	not collected	Uganda	East Africa		Kotido	Clinical (Human)	Human	Clinical	2020
GCA_046710605.1	SAMN43554756	NA	PDT002564928.1	Uganda: Kyotera	SRR30613523	not collected	Uganda	East Africa		Kyotera	Clinical (Human)	Human	Clinical	2024
GCA_046710625.1	SAMN43554757	NA	PDT002564926.1	Uganda: Kyotera	SRR30613521	not collected	Uganda	East Africa		Kyotera	Clinical (Human)	Human	Clinical	2024
GCA_046710645.1	SAMN43554727	NA	PDT002564935.1	Uganda: Kayunga	SRR30613530	not collected	Uganda	East Africa		Kayunga	Clinical (Human)	Human	Clinical	2023
GCA_046710705.1	SAMN43554759	NA	PDT002564924.1	Uganda: Kyotera	SRR30613519	not collected	Uganda	East Africa		Kyotera	Clinical (Human)	Human	Clinical	2024
GCA_046710785.1	SAMN43554760	NA	PDT002564923.1	Uganda: Kyotera	SRR30613518	not collected	Uganda	East Africa		Kyotera	Clinical (Human)	Human	Clinical	2024
GCA_046710805.1	SAMN43554763	NA	PDT002564920.1	Uganda: Kyotera	SRR30613515	not collected	Uganda	East Africa		Kyotera	Clinical (Human)	Human	Clinical	2024
GCA_046710825.1	SAMN43554734	NA	PDT002564908.1	Uganda: Kayunga	SRR30613503	not collected	Uganda	East Africa		Kayunga	Clinical (Human)	Human	Clinical	2023
GCA_046710845.1	SAMN43554735	NA	PDT002564907.1	Uganda: Kayunga	SRR30613502	not collected	Uganda	East Africa		Kayunga	Clinical (Human)	Human	Clinical	2023
GCA_046710925.1	SAMN43554738	NA	PDT002564903.1	Uganda: Kayunga	SRR30613498	not collected	Uganda	East Africa		Kayunga	Clinical (Human)	Human	Clinical	2020
GCA_046710985.1	SAMN43554739	NA	PDT002564902.1	Uganda: Kayunga	SRR30613497	not collected	Uganda	East Africa		Kayunga	Clinical (Human)	Human	Clinical	2020
GCA_046711025.1	SAMN43554743	NA	PDT002564898.1	Uganda: Nabilatuk	SRR30613493	not collected	Uganda	East Africa		Nabilatuk	Clinical (Human)	Human	Clinical	2020
GCA_046711045.1	SAMN43554745	NA	PDT002564896.1	Uganda: Napak	SRR30613491	not collected	Uganda	East Africa		Napak	Clinical (Human)	Human	Clinical	2020
GCA_046711065.1	SAMN43554740	NA	PDT002564901.1	Uganda: Moroto	SRR30613496	not collected	Uganda	East Africa		Moroto	Clinical (Human)	Human	Clinical	2020
GCA_046711165.1	SAMN43554746	NA	PDT002564895.1	Uganda: Nabilatuk	SRR30613490	not collected	Uganda	East Africa		Nabilatuk	Clinical (Human)	Human	Clinical	2020
GCA_046711185.1	SAMN43554747	NA	PDT002564893.1	Uganda: Nabilatuk	SRR30613488	not collected	Uganda	East Africa		Nabilatuk	Clinical (Human)	Human	Clinical	2020
GCA_046711225.1	SAMN43554749	NA	PDT002564891.1	Uganda: Nabilatuk	SRR30613486	not collected	Uganda	East Africa		Nabilatuk	Clinical (Human)	Human	Clinical	2020
GCA_046711265.1	SAMN43517953	NA	PDT002564889.1	Malawi: Southern Region	SRR30566924	not collected	Malawi	East Africa		Southern Region	Clinical (Human)	Human	Clinical	2023
GCA_046711285.1	SAMN43517962	NA	PDT002564888.1	Malawi: Southern Region	SRR30566923	not collected	Malawi	East Africa		Southern Region	Clinical (Human)	Human	Clinical	2023
GCA_046711325.1	SAMN43517964	NA	PDT002564886.1	Malawi: Central Region	SRR30566921	not collected	Malawi	East Africa		Central Region	Clinical (Human)	Human	Clinical	2023
GCA_046711345.1	SAMN43517966	NA	PDT002564884.1	Malawi: Central Region	SRR30566919	not collected	Malawi	East Africa		Central Region	Clinical (Human)	Human	Clinical	2022
GCA_046711405.1	SAMN43517967	NA	PDT002564883.1	Malawi: Central Region	SRR30566918	not collected	Malawi	East Africa		Central Region	Clinical (Human)	Human	Clinical	2022
GCA_046711475.1	SAMN43517970	NA	PDT002564880.1	Malawi: Central Region	SRR30566915	not collected	Malawi	East Africa		Central Region	Clinical (Human)	Human	Clinical	2022
GCA_046711495.1	SAMN43517968	NA	PDT002564882.1	Malawi: Central Region	SRR30566917	not collected	Malawi	East Africa		Central Region	Clinical (Human)	Human	Clinical	2022
GCA_046711525.1	SAMN43517969	NA	PDT002564881.1	Malawi: Central Region	SRR30566916	not collected	Malawi	East Africa		Central Region	Clinical (Human)	Human	Clinical	2022
GCA_046711565.1	SAMN43517954	NA	PDT002564878.1	Malawi: Southern Region	SRR30566913	not collected	Malawi	East Africa		Southern Region	Clinical (Human)	Human	Clinical	2023
GCA_046711575.1	SAMN43517971	NA	PDT002564879.1	Malawi: Northern Region	SRR30566914	not collected	Malawi	East Africa		Northern Region	Clinical (Human)	Human	Clinical	2022
GCA_046711665.1	SAMN43517973	NA	PDT002564876.1	Malawi: Central Region	SRR30566911	not collected	Malawi	East Africa		Central Region	Clinical (Human)	Human	Clinical	2022
GCA_046711695.1	SAMN43517974	NA	PDT002564875.1	Malawi: Central Region	SRR30566910	not collected	Malawi	East Africa		Central Region	Clinical (Human)	Human	Clinical	2022
GCA_046711725.1	SAMN43517972	NA	PDT002564877.1	Malawi: Central Region	SRR30566912	not collected	Malawi	East Africa		Central Region	Clinical (Human)	Human	Clinical	2022
GCA_046711745.1	SAMN43517976	NA	PDT002564873.1	Malawi: Northern Region	SRR30566908	not collected	Malawi	East Africa		Northern Region	Clinical (Human)	Human	Clinical	2022
GCA_046711755.1	SAMN43517975	NA	PDT002564874.1	Malawi: Central Region	SRR30566909	not collected	Malawi	East Africa		Central Region	Clinical (Human)	Human	Clinical	2022
GCA_046711865.1	SAMN43517977	NA	PDT002564872.1	Malawi: Southern Region	SRR30566907	not collected	Malawi	East Africa		Southern Region	Clinical (Human)	Human	Clinical	2022
GCA_046711905.1	SAMN43517984	NA	PDT002564864.1	Malawi: Central Region	SRR30566899	not collected	Malawi	East Africa		Central Region	Clinical (Human)	Human	Clinical	2022
GCA_046711945.1	SAMN43517986	NA	PDT002564862.1	Malawi: Central Region	SRR30566897	not collected	Malawi	East Africa		Central Region	Clinical (Human)	Human	Clinical	2022
GCA_046711965.1	SAMN43517983	NA	PDT002564865.1	Malawi: Central Region	SRR30566900	not collected	Malawi	East Africa		Central Region	Clinical (Human)	Human	Clinical	2022
GCA_046711985.1	SAMN43517987	NA	PDT002564861.1	Malawi: Central Region	SRR30566896	not collected	Malawi	East Africa		Central Region	Clinical (Human)	Human	Clinical	2022
GCA_046712045.1	SAMN43517989	NA	PDT002564859.1	Malawi: Central Region	SRR30566894	not collected	Malawi	East Africa		Central Region	Clinical (Human)	Human	Clinical	2022
GCA_046712105.1	SAMN43517990	NA	PDT002564858.1	Malawi: Central Region	SRR30566893	not collected	Malawi	East Africa		Central Region	Clinical (Human)	Human	Clinical	2022
GCA_046712145.1	SAMN43517956	NA	PDT002564856.1	Malawi: Southern Region	SRR30566891	not collected	Malawi	East Africa		Southern Region	Clinical (Human)	Human	Clinical	2023
GCA_046712605.1	SAMN43517979	NA	PDT002564870.1	Malawi: Southern Region	SRR30566905	not collected	Malawi	East Africa		Southern Region	Clinical (Human)	Human	Clinical	2022
GCA_046712645.1	SAMN43517980	NA	PDT002564869.1	Malawi: Southern Region	SRR30566904	not collected	Malawi	East Africa		Southern Region	Clinical (Human)	Human	Clinical	2022
GCA_046712685.1	SAMN43517981	NA	PDT002564868.1	Malawi: Northern Region	SRR30566903	not collected	Malawi	East Africa		Northern Region	Clinical (Human)	Human	Clinical	2022
GCA_046712695.1	SAMN43517978	NA	PDT002564871.1	Malawi: Southern Region	SRR30566906	not collected	Malawi	East Africa		Southern Region	Clinical (Human)	Human	Clinical	2022
GCA_046712715.1	SAMN43517955	NA	PDT002564867.1	Malawi: Southern Region	SRR30566902	not collected	Malawi	East Africa		Southern Region	Clinical (Human)	Human	Clinical	2023
GCA_046712765.1	SAMN43517985	NA	PDT002564863.1	Malawi: Central Region	SRR30566898	not collected	Malawi	East Africa		Central Region	Clinical (Human)	Human	Clinical	2022
GCA_046712795.1	SAMN43517982	NA	PDT002564866.1	Malawi: Central Region	SRR30566901	not collected	Malawi	East Africa		Central Region	Clinical (Human)	Human	Clinical	2023
GCA_046712875.1	SAMN43517991	NA	PDT002564857.1	Malawi: Central Region	SRR30566892	not collected	Malawi	East Africa		Central Region	Clinical (Human)	Human	Clinical	2022
GCA_046712885.1	SAMN43517988	NA	PDT002564860.1	Malawi: Central Region	SRR30566895	not collected	Malawi	East Africa		Central Region	Clinical (Human)	Human	Clinical	2022
GCA_046712925.1	SAMN43517992	NA	PDT002564855.1	Malawi: Northern Region	SRR30566890	not collected	Malawi	East Africa		Northern Region	Clinical (Human)	Human	Clinical	2022
GCA_046712945.1	SAMN43517993	NA	PDT002564854.1	Malawi: Central Region	SRR30566889	not collected	Malawi	East Africa		Central Region	Clinical (Human)	Human	Clinical	2022
GCA_046713005.1	SAMN43517996	NA	PDT002564851.1	Malawi: Southern Region	SRR30566886	not collected	Malawi	East Africa		Southern Region	Clinical (Human)	Human	Clinical	2022
GCA_046713025.1	SAMN43517995	NA	PDT002564852.1	Malawi: Southern Region	SRR30566887	not collected	Malawi	East Africa		Southern Region	Clinical (Human)	Human	Clinical	2022
GCA_046713105.1	SAMN43517997	NA	PDT002564850.1	Malawi: Southern Region	SRR30566885	not collected	Malawi	East Africa		Southern Region	Clinical (Human)	Human	Clinical	2022
GCA_046713165.1	SAMN43517999	NA	PDT002564848.1	Malawi: Southern Region	SRR30566883	not collected	Malawi	East Africa		Southern Region	Clinical (Human)	Human	Clinical	2023
GCA_046713185.1	SAMN43517998	NA	PDT002564849.1	Malawi: Central Region	SRR30566884	not collected	Malawi	East Africa		Central Region	Clinical (Human)	Human	Clinical	2022
GCA_046713205.1	SAMN43518000	NA	PDT002564847.1	Malawi: Southern Region	SRR30566882	not collected	Malawi	East Africa		Southern Region	Clinical (Human)	Human	Clinical	2023
GCA_046713275.1	SAMN43518001	NA	PDT002564846.1	Malawi: Northern Region	SRR30566881	not collected	Malawi	East Africa		Northern Region	Clinical (Human)	Human	Clinical	2022
GCA_046713305.1	SAMN43517957	NA	PDT002564845.1	Malawi: Southern Region	SRR30566880	not collected	Malawi	East Africa		Southern Region	Clinical (Human)	Human	Clinical	2023
GCA_046713325.1	SAMN43518002	NA	PDT002564844.1	Malawi: Southern Region	SRR30566879	not collected	Malawi	East Africa		Southern Region	Clinical (Human)	Human	Clinical	2023
GCA_046713365.1	SAMN43518004	NA	PDT002564842.1	Malawi: Southern Region	SRR30566877	not collected	Malawi	East Africa		Southern Region	Clinical (Human)	Human	Clinical	2023
GCA_046713405.1	SAMN43518003	NA	PDT002564843.1	Malawi: Southern Region	SRR30566878	not collected	Malawi	East Africa		Southern Region	Clinical (Human)	Human	Clinical	2023
GCA_046713475.1	SAMN43518005	NA	PDT002564841.1	Malawi: Southern Region	SRR30566876	not collected	Malawi	East Africa		Southern Region	Clinical (Human)	Human	Clinical	2023
GCA_046713525.1	SAMN43518007	NA	PDT002564839.1	Malawi: Central Region	SRR30566874	not collected	Malawi	East Africa		Central Region	Clinical (Human)	Human	Clinical	2023
GCA_046713565.1	SAMN43518008	NA	PDT002564838.1	Malawi: Central Region	SRR30566873	not collected	Malawi	East Africa		Central Region	Clinical (Human)	Human	Clinical	2022
GCA_046713595.1	SAMN43518009	NA	PDT002564837.1	Malawi: Central Region	SRR30566872	not collected	Malawi	East Africa		Central Region	Clinical (Human)	Human	Clinical	2023
GCA_046713645.1	SAMN43518006	NA	PDT002564840.1	Malawi: Central Region	SRR30566875	not collected	Malawi	East Africa		Central Region	Clinical (Human)	Human	Clinical	2023
GCA_046713695.1	SAMN43517958	NA	PDT002564834.1	Malawi: Southern Region	SRR30566869	not collected	Malawi	East Africa		Southern Region	Clinical (Human)	Human	Clinical	2023
GCA_046713715.1	SAMN43518010	NA	PDT002564836.1	Malawi: Central Region	SRR30566871	not collected	Malawi	East Africa		Central Region	Clinical (Human)	Human	Clinical	2022
GCA_046713735.1	SAMN43518011	NA	PDT002564835.1	Malawi: Central Region	SRR30566870	not collected	Malawi	East Africa		Central Region	Clinical (Human)	Human	Clinical	2023
GCA_046713765.1	SAMN43518012	NA	PDT002564833.1	Malawi: Central Region	SRR30566868	not collected	Malawi	East Africa		Central Region	Clinical (Human)	Human	Clinical	2023
GCA_046713835.1	SAMN43518013	NA	PDT002564832.1	Malawi: Southern Region	SRR30566867	not collected	Malawi	East Africa		Southern Region	Clinical (Human)	Human	Clinical	2023
GCA_046713855.1	SAMN43518014	NA	PDT002564831.1	Malawi: Southern Region	SRR30566866	not collected	Malawi	East Africa		Southern Region	Clinical (Human)	Human	Clinical	2023
GCA_046713915.1	SAMN43518016	NA	PDT002564829.1	Malawi: Southern Region	SRR30566864	not collected	Malawi	East Africa		Southern Region	Clinical (Human)	Human	Clinical	2023
GCA_046713955.1	SAMN43518017	NA	PDT002564828.1	Malawi: Southern Region	SRR30566863	not collected	Malawi	East Africa		Southern Region	Clinical (Human)	Human	Clinical	2022
GCA_046713995.1	SAMN43518019	NA	PDT002564826.1	Malawi: Southern Region	SRR30566861	not collected	Malawi	East Africa		Southern Region	Clinical (Human)	Human	Clinical	2022
GCA_046714025.1	SAMN43518015	NA	PDT002564830.1	Malawi: Southern Region	SRR30566865	not collected	Malawi	East Africa		Southern Region	Clinical (Human)	Human	Clinical	2023
GCA_046714075.1	SAMN43518018	NA	PDT002564827.1	Malawi: Southern Region	SRR30566862	not collected	Malawi	East Africa		Southern Region	Clinical (Human)	Human	Clinical	2022
GCA_046714105.1	SAMN43518020	NA	PDT002564825.1	Malawi: Southern Region	SRR30566860	not collected	Malawi	East Africa		Southern Region	Clinical (Human)	Human	Clinical	2023
GCA_046715115.1	SAMN43517960	NA	PDT002564823.1	Malawi: Southern Region	SRR30566858	not collected	Malawi	East Africa		Southern Region	Clinical (Human)	Human	Clinical	2023
GCA_046715135.1	SAMN43517959	NA	PDT002564824.1	Malawi: Southern Region	SRR30566859	not collected	Malawi	East Africa		Southern Region	Clinical (Human)	Human	Clinical	2023
GCA_046715175.1	SAMN43517961	NA	PDT002564822.1	Malawi: Southern Region	SRR30566857	not collected	Malawi	East Africa		Southern Region	Clinical (Human)	Human	Clinical	2022
GCA_046717475.1	SAMN43963875	NA	PDT002565076.1	Nigeria: Adamawa	SRR30823466	not collected	Nigeria	West Africa		Adamawa	Clinical (Human)	Human	Clinical	2019
GCA_046718395.1	SAMN44369180	NA	PDT002565265.1	Zambia: Lusaka	SRR31063662	not collected	Zambia	East Africa		Lusaka	Clinical (Human)	Human	Clinical	2024
GCA_046736555.1	SAMN43684732	NA	PDT002565107.1	Mozambique: Nampula	SRR31002825	not collected	Mozambique	East Africa		Nampula	Clinical (Human)	Human	Clinical	2023
GCA_046736635.1	SAMN43684729	NA	PDT002565111.1	Mozambique: Nampula	SRR31002829	not collected	Mozambique	East Africa		Nampula	Clinical (Human)	Human	Clinical	2023
GCA_046736655.1	SAMN43684724	NA	PDT002565116.1	Mozambique: Tete	SRR31002834	not collected	Mozambique	East Africa		Tete	Clinical (Human)	Human	Clinical	2023
GCA_047058645.1	SAMN43792961	NA	PDT002565461.1	Democratic Republic of the Congo: Sud-Kivu	SRR31411815	not collected	Democratic Republic of the Congo	Central Africa		Sud-Kivu	Clinical (Human)	Human	Clinical	2022
GCA_047058665.1	SAMN43792793	NA	PDT002565479.1	Democratic Republic of the Congo: Nord-Kivu	SRR31411833	not collected	Democratic Republic of the Congo	Central Africa		Nord-Kivu	Clinical (Human)	Human	Clinical	2022
GCA_047801255.1	SAMEA117590514	YA00551298	PDT002627401.1	South Africa	ERR14125912	NA	South Africa	Southern Africa			Clinical (Human)		Clinical	2024
GCA_047880725.1	SAMN44369313	NA	PDT002565328.1	Zambia: Central	SRR31063725	not collected	Zambia	East Africa		Central	Clinical (Human)	Human	Clinical	2024
GCA_047880745.1	SAMN43963822	NA	PDT002565005.1	Nigeria: Lagos	SRR30823395	not collected	Nigeria	West Africa		Lagos	Clinical (Human)	Human	Clinical	2024
GCA_047880765.1	SAMN43963815	NA	PDT002565013.1	Nigeria: Lagos	SRR30823403	not collected	Nigeria	West Africa		Lagos	Clinical (Human)	Human	Clinical	2024
GCA_047880785.1	SAMN43881793	NA	PDT002564963.1	Cameroon: Centre	SRR30765764	not collected	Cameroon	Central Africa		Centre	Clinical (Human)	Human	Clinical	2023
GCA_047880805.1	SAMN43963804	NA	PDT002565025.1	Nigeria: Borno	SRR30823415	not collected	Nigeria	West Africa		Borno	Clinical (Human)	Human	Clinical	2022
GCA_048612085.1	SAMN46560026	O1	PDT002645130.1	Ethiopia: Bahir Dar	SRR32238365	11.5876 N 37.3878 E	Ethiopia	East Africa		Bahir Dar	Clinical (Human)	Human	Clinical	2022
GCA_048612115.1	SAMN46560036	O1	PDT002645128.1	Ethiopia: Alert	SRR32238363	9.0192 N 38.7525 E	Ethiopia	East Africa		Alert	Clinical (Human)	Human	Clinical	2022
GCA_048612135.1	SAMN46560038	O1	PDT002645126.1	Ethiopia: Bahir Dar	SRR32238361	11.5876 N 37.3878 E	Ethiopia	East Africa		Bahir Dar	Clinical (Human)	Human	Clinical	2022
GCA_048612155.1	SAMN46560040	O1	PDT002645124.1	Ethiopia: Bahir Dar	SRR32238359	11.5876 N 37.3878 E	Ethiopia	East Africa		Bahir Dar	Clinical (Human)	Human	Clinical	2022
GCA_048612175.1	SAMN46560042	O1	PDT002645122.1	Ethiopia: Bahir Dar	SRR32238357	11.5876 N 37.3878 E	Ethiopia	East Africa		Bahir Dar	Clinical (Human)	Human	Clinical	2022
GCA_048612185.1	SAMN46560043	O1	PDT002645121.1	Ethiopia: Alert	SRR32238356	9.0192 N 38.7525 E	Ethiopia	East Africa		Alert	Clinical (Human)	Human	Clinical	2022
GCA_048612215.1	SAMN46560027	O1	PDT002645119.1	Ethiopia: Bahir Dar	SRR32238354	11.5876 N 37.3878 E	Ethiopia	East Africa		Bahir Dar	Clinical (Human)	Human	Clinical	2022
GCA_048612235.1	SAMN46560047	O1	PDT002645116.1	Ethiopia: Bahir Dar	SRR32238351	11.5876 N 37.3878 E	Ethiopia	East Africa		Bahir Dar	Clinical (Human)	Human	Clinical	2022
GCA_048612255.1	SAMN46560050	O1	PDT002645113.1	Ethiopia: Bahir Dar	SRR32238348	11.5876 N 37.3878 E	Ethiopia	East Africa		Bahir Dar	Clinical (Human)	Human	Clinical	2022
GCA_048612275.1	SAMN46560051	O1	PDT002645112.1	Ethiopia: Bahir Dar	SRR32238347	11.5876 N 37.3878 E	Ethiopia	East Africa		Bahir Dar	Clinical (Human)	Human	Clinical	2022
GCA_048612285.1	SAMN46560054	O1	PDT002645109.1	Ethiopia: Bahir Dar	SRR32238344	11.5876 N 37.3878 E	Ethiopia	East Africa		Bahir Dar	Clinical (Human)	Human	Clinical	2022
GCA_048612315.1	SAMN46560055	O1	PDT002645107.1	Ethiopia: Bahir Dar	SRR32238342	11.5876 N 37.3878 E	Ethiopia	East Africa		Bahir Dar	Clinical (Human)	Human	Clinical	2022
GCA_048612325.1	SAMN46560028	O1	PDT002645108.1	Ethiopia: Bahir Dar	SRR32238343	11.5876 N 37.3878 E	Ethiopia	East Africa		Bahir Dar	Clinical (Human)	Human	Clinical	2022
GCA_048612335.1	SAMN46560056	O1	PDT002645106.1	Ethiopia: Bahir Dar	SRR32238341	11.5876 N 37.3878 E	Ethiopia	East Africa		Bahir Dar	Clinical (Human)	Human	Clinical	2022
GCA_048612375.1	SAMN46560057	O1	PDT002645105.1	Ethiopia: Bahir Dar	SRR32238340	11.5876 N 37.3878 E	Ethiopia	East Africa		Bahir Dar	Clinical (Human)	Human	Clinical	2022
GCA_048612395.1	SAMN46560058	O1	PDT002645104.1	Ethiopia: Bahir Dar	SRR32238339	11.5876 N 37.3878 E	Ethiopia	East Africa		Bahir Dar	Clinical (Human)	Human	Clinical	2022
GCA_048612415.1	SAMN46560029	O1	PDT002645103.1	Ethiopia: Alert	SRR32238338	9.0192 N 38.7525 E	Ethiopia	East Africa		Alert	Clinical (Human)	Human	Clinical	2022
GCA_048612435.1	SAMN46560030	O1	PDT002645102.1	Ethiopia: Alert	SRR32238337	9.0192 N 38.7525 E	Ethiopia	East Africa		Alert	Clinical (Human)	Human	Clinical	2022
GCA_048612445.1	SAMN46560032	O1	PDT002645100.1	Ethiopia: Bahir Dar	SRR32238335	11.5876 N 37.3878 E	Ethiopia	East Africa		Bahir Dar	Clinical (Human)	Human	Clinical	2022
GCA_048612475.1	SAMN46560031	O1	PDT002645101.1	Ethiopia: Alert	SRR32238336	9.0192 N 38.7525 E	Ethiopia	East Africa		Alert	Clinical (Human)	Human	Clinical	2022
GCA_048612495.1	SAMN46560033	O1	PDT002645099.1	Ethiopia: Alert	SRR32238334	9.0192 N 38.7525 E	Ethiopia	East Africa		Alert	Clinical (Human)	Human	Clinical	2022
GCA_048612515.1	SAMN46560034	O1	PDT002645098.1	Ethiopia: Alert	SRR32238333	9.0192 N 38.7525 E	Ethiopia	East Africa		Alert	Clinical (Human)	Human	Clinical	2022
GCA_048612535.1	SAMN46560035	O1	PDT002645129.1	Ethiopia: Bahir Dar	SRR32238364	11.5876 N 37.3878 E	Ethiopia	East Africa		Bahir Dar	Clinical (Human)	Human	Clinical	2022
GCA_048612555.1	SAMN46560037	O1	PDT002645127.1	Ethiopia: Alert	SRR32238362	9.0192 N 38.7525 E	Ethiopia	East Africa		Alert	Clinical (Human)	Human	Clinical	2022
GCA_048612575.1	SAMN46560041	O1	PDT002645123.1	Ethiopia: Alert	SRR32238358	9.0192 N 38.7525 E	Ethiopia	East Africa		Alert	Clinical (Human)	Human	Clinical	2022
GCA_048612595.1	SAMN46560039	O1	PDT002645125.1	Ethiopia: Alert	SRR32238360	9.0192 N 38.7525 E	Ethiopia	East Africa		Alert	Clinical (Human)	Human	Clinical	2022
GCA_048612615.1	SAMN46560046	O1	PDT002645117.1	Ethiopia: Bahir Dar	SRR32238352	11.5876 N 37.3878 E	Ethiopia	East Africa		Bahir Dar	Clinical (Human)	Human	Clinical	2022
GCA_048612635.1	SAMN46560048	O1	PDT002645115.1	Ethiopia: Bahir Dar	SRR32238350	11.5876 N 37.3878 E	Ethiopia	East Africa		Bahir Dar	Clinical (Human)	Human	Clinical	2022
GCA_048612655.1	SAMN46560053	O1	PDT002645110.1	Ethiopia: Alert	SRR32238345	9.0192 N 38.7525 E	Ethiopia	East Africa		Alert	Clinical (Human)	Human	Clinical	2022
GCA_048612675.1	SAMN46560049	O1	PDT002645114.1	Ethiopia: Alert	SRR32238349	9.0192 N 38.7525 E	Ethiopia	East Africa		Alert	Clinical (Human)	Human	Clinical	2022
GCA_048612755.1	SAMN46560044	O1	PDT002645120.1	Ethiopia: Bahir Dar	SRR32238355	11.5876 N 37.3878 E	Ethiopia	East Africa		Bahir Dar	Clinical (Human)	Human	Clinical	2022
GCA_048612765.1	SAMEA117594566	CTMA_1845	PDT002644996.1	Republic of the Congo	ERR14146430	2.22 S 28.95 E	Republic of the Congo	Central Africa			Food/Aquatic Animal	Aquatic/Environmental		2021
GCA_048612795.1	SAMN46560025	O1	PDT002645131.1	Ethiopia: Bahir Dar	SRR32238366	11.5876 N 37.3878 E	Ethiopia	East Africa		Bahir Dar	Clinical (Human)	Human	Clinical	2022
GCA_048833335.1	SAMEA117851731	HG14528199	PDT002682880.1	South Africa	ERR14766728	NA	South Africa	Southern Africa			Clinical (Human)		Clinical	2025
GCA_048833375.1	SAMEA117851730	YA00570981_2	PDT002682879.1	Namibia	ERR14766727	NA	Namibia	Southern Africa			Clinical (Human)		Clinical	2025
GCA_048833395.1	SAMEA117851729	HG14527234	PDT002682878.1	South Africa	ERR14766726	NA	South Africa	Southern Africa			Clinical (Human)		Clinical	2025
GCA_048868345.1	SAMN47280018	NA	PDT002663585.1	Democratic Republic of the Congo	SRR32625684	2.5123 S 28.8480 E	Democratic Republic of the Congo	Central Africa			Clinical (Human)	Human	Clinical	2021
GCA_048868365.1	SAMN47280119	NA	PDT002663581.1	Democratic Republic of the Congo	SRR32625680	2.5123 S 28.8480 E	Democratic Republic of the Congo	Central Africa			Clinical (Human)	Human	Clinical	2023
GCA_048868385.1	SAMN47280019	NA	PDT002663584.1	Democratic Republic of the Congo	SRR32625683	2.5123 S 28.8480 E	Democratic Republic of the Congo	Central Africa			Clinical (Human)	Human	Clinical	2020
GCA_048868405.1	SAMN47280122	NA	PDT002663578.1	Democratic Republic of the Congo	SRR32625677	2.5123 S 28.8480 E	Democratic Republic of the Congo	Central Africa			Clinical (Human)	Human	Clinical	2023
GCA_048868425.1	SAMN47280123	NA	PDT002663577.1	Democratic Republic of the Congo	SRR32625676	2.5123 S 28.8480 E	Democratic Republic of the Congo	Central Africa			Clinical (Human)	Human	Clinical	2023
GCA_048868445.1	SAMN47280121	NA	PDT002663579.1	Democratic Republic of the Congo	SRR32625678	2.5123 S 28.8480 E	Democratic Republic of the Congo	Central Africa			Clinical (Human)	Human	Clinical	2023
GCA_048868465.1	SAMN47280124	NA	PDT002663576.1	Democratic Republic of the Congo	SRR32625675	2.5123 S 28.8480 E	Democratic Republic of the Congo	Central Africa			Clinical (Human)	Human	Clinical	2023
GCA_048868485.1	SAMN47280125	NA	PDT002663575.1	Democratic Republic of the Congo	SRR32625674	2.5123 S 28.8480 E	Democratic Republic of the Congo	Central Africa			Clinical (Human)	Human	Clinical	2023
GCA_048868785.1	SAMN47280126	NA	PDT002663574.1	Democratic Republic of the Congo	SRR32625673	2.5123 S 28.8480 E	Democratic Republic of the Congo	Central Africa			Clinical (Human)	Human	Clinical	2023
GCA_048868805.1	SAMN47280127	NA	PDT002663573.1	Democratic Republic of the Congo	SRR32625672	2.5123 S 28.8480 E	Democratic Republic of the Congo	Central Africa			Clinical (Human)	Human	Clinical	2023
GCA_048868825.1	SAMN47280029	NA	PDT002663572.1	Democratic Republic of the Congo	SRR32625671	2.5123 S 28.8480 E	Democratic Republic of the Congo	Central Africa			Clinical (Human)	Human	Clinical	2020
GCA_048868845.1	SAMN47280128	NA	PDT002663571.1	Democratic Republic of the Congo	SRR32625670	2.5123 S 28.8480 E	Democratic Republic of the Congo	Central Africa			Clinical (Human)	Human	Clinical	2023
GCA_048868865.1	SAMN47280129	NA	PDT002663570.1	Democratic Republic of the Congo	SRR32625669	2.5123 S 28.8480 E	Democratic Republic of the Congo	Central Africa			Clinical (Human)	Human	Clinical	2023
GCA_048868885.1	SAMN47280130	NA	PDT002663569.1	Democratic Republic of the Congo	SRR32625668	2.5123 S 28.8480 E	Democratic Republic of the Congo	Central Africa			Clinical (Human)	Human	Clinical	2023
GCA_048868905.1	SAMN47280132	NA	PDT002663567.1	Democratic Republic of the Congo	SRR32625666	2.5123 S 28.8480 E	Democratic Republic of the Congo	Central Africa			Clinical (Human)	Human	Clinical	2023
GCA_048868925.1	SAMN47280136	NA	PDT002663563.1	Democratic Republic of the Congo	SRR32625662	2.5123 S 28.8480 E	Democratic Republic of the Congo	Central Africa			Clinical (Human)	Human	Clinical	2023
GCA_048868945.1	SAMN47280030	NA	PDT002663561.1	Democratic Republic of the Congo	SRR32625660	2.5123 S 28.8480 E	Democratic Republic of the Congo	Central Africa			Clinical (Human)	Human	Clinical	2020
GCA_048868965.1	SAMN47280133	NA	PDT002663566.1	Democratic Republic of the Congo	SRR32625665	2.5123 S 28.8480 E	Democratic Republic of the Congo	Central Africa			Clinical (Human)	Human	Clinical	2023
GCA_048868985.1	SAMN47280140	NA	PDT002663558.1	Democratic Republic of the Congo	SRR32625657	2.5123 S 28.8480 E	Democratic Republic of the Congo	Central Africa			Clinical (Human)	Human	Clinical	2022
GCA_048869005.1	SAMN47280142	NA	PDT002663556.1	Democratic Republic of the Congo	SRR32625655	2.5123 S 28.8480 E	Democratic Republic of the Congo	Central Africa			Clinical (Human)	Human	Clinical	2022
GCA_048869025.1	SAMN47280144	NA	PDT002663554.1	Democratic Republic of the Congo	SRR32625653	2.5123 S 28.8480 E	Democratic Republic of the Congo	Central Africa			Clinical (Human)	Human	Clinical	2023
GCA_048869045.1	SAMN47280204	NA	PDT002663552.1	Democratic Republic of the Congo	SRR32625651	2.5123 S 28.8480 E	Democratic Republic of the Congo	Central Africa			Clinical (Human)	Human	Clinical	2021
GCA_048869065.1	SAMN47280205	NA	PDT002663551.1	Democratic Republic of the Congo	SRR32625650	2.5123 S 28.8480 E	Democratic Republic of the Congo	Central Africa			Clinical (Human)	Human	Clinical	2022
GCA_048869085.1	SAMN47280203	NA	PDT002663553.1	Democratic Republic of the Congo	SRR32625652	2.5123 S 28.8480 E	Democratic Republic of the Congo	Central Africa			Clinical (Human)	Human	Clinical	2023
GCA_048869105.1	SAMN47280037	NA	PDT002663548.1	Democratic Republic of the Congo	SRR32625647	2.5123 S 28.8480 E	Democratic Republic of the Congo	Central Africa			Clinical (Human)	Human	Clinical	2020
GCA_048869125.1	SAMN47280206	NA	PDT002663550.1	Democratic Republic of the Congo	SRR32625649	2.5123 S 28.8480 E	Democratic Republic of the Congo	Central Africa			Clinical (Human)	Human	Clinical	2022
GCA_048869145.1	SAMN47280209	NA	PDT002663546.1	Democratic Republic of the Congo	SRR32625645	2.5123 S 28.8480 E	Democratic Republic of the Congo	Central Africa			Clinical (Human)	Human	Clinical	2023
GCA_048869165.1	SAMN47280210	NA	PDT002663545.1	Democratic Republic of the Congo	SRR32625644	2.5123 S 28.8480 E	Democratic Republic of the Congo	Central Africa			Clinical (Human)	Human	Clinical	2023
GCA_048869185.1	SAMN47280212	NA	PDT002663543.1	Democratic Republic of the Congo	SRR32625642	2.5123 S 28.8480 E	Democratic Republic of the Congo	Central Africa			Clinical (Human)	Human	Clinical	2023
GCA_048869205.1	SAMN47280215	NA	PDT002663540.1	Democratic Republic of the Congo	SRR32625639	2.5123 S 28.8480 E	Democratic Republic of the Congo	Central Africa			Clinical (Human)	Human	Clinical	2022
GCA_048869225.1	SAMN47280020	NA	PDT002663537.1	Democratic Republic of the Congo	SRR32625636	2.5123 S 28.8480 E	Democratic Republic of the Congo	Central Africa			Clinical (Human)	Human	Clinical	2020
GCA_048869245.1	SAMN47280216	NA	PDT002663539.1	Democratic Republic of the Congo	SRR32625638	2.5123 S 28.8480 E	Democratic Republic of the Congo	Central Africa			Clinical (Human)	Human	Clinical	2023
GCA_048869265.1	SAMN47280220	NA	PDT002663533.1	Democratic Republic of the Congo	SRR32625632	2.5123 S 28.8480 E	Democratic Republic of the Congo	Central Africa			Clinical (Human)	Human	Clinical	2022
GCA_048869285.1	SAMN47280221	NA	PDT002663532.1	Democratic Republic of the Congo	SRR32625631	2.5123 S 28.8480 E	Democratic Republic of the Congo	Central Africa			Clinical (Human)	Human	Clinical	2022
GCA_048869305.1	SAMN47280224	NA	PDT002663529.1	Democratic Republic of the Congo	SRR32625628	2.5123 S 28.8480 E	Democratic Republic of the Congo	Central Africa			Clinical (Human)	Human	Clinical	2022
GCA_048869325.1	SAMN47280225	NA	PDT002663528.1	Democratic Republic of the Congo	SRR32625627	2.5123 S 28.8480 E	Democratic Republic of the Congo	Central Africa			Clinical (Human)	Human	Clinical	2023
GCA_048869345.1	SAMN47280228	NA	PDT002663524.1	Democratic Republic of the Congo	SRR32625623	2.5123 S 28.8480 E	Democratic Republic of the Congo	Central Africa			Clinical (Human)	Human	Clinical	2023
GCA_048869365.1	SAMN47280229	NA	PDT002663523.1	Democratic Republic of the Congo	SRR32625622	2.5123 S 28.8480 E	Democratic Republic of the Congo	Central Africa			Clinical (Human)	Human	Clinical	2023
GCA_048869385.1	SAMN47280145	NA	PDT002663521.1	Democratic Republic of the Congo	SRR32625620	2.5123 S 28.8480 E	Democratic Republic of the Congo	Central Africa			Clinical (Human)	Human	Clinical	2021
GCA_048869405.1	SAMN47280147	NA	PDT002663519.1	Democratic Republic of the Congo	SRR32625618	2.5123 S 28.8480 E	Democratic Republic of the Congo	Central Africa			Clinical (Human)	Human	Clinical	2021
GCA_048869425.1	SAMN47280149	NA	PDT002663516.1	Democratic Republic of the Congo	SRR32625615	2.5123 S 28.8480 E	Democratic Republic of the Congo	Central Africa			Clinical (Human)	Human	Clinical	2022
GCA_048869445.1	SAMN47280031	NA	PDT002663518.1	Democratic Republic of the Congo	SRR32625617	2.5123 S 28.8480 E	Democratic Republic of the Congo	Central Africa			Clinical (Human)	Human	Clinical	2020
GCA_048869465.1	SAMN47280154	NA	PDT002663511.1	Democratic Republic of the Congo	SRR32625610	2.5123 S 28.8480 E	Democratic Republic of the Congo	Central Africa			Clinical (Human)	Human	Clinical	2023
GCA_048869485.1	SAMN47280151	NA	PDT002663514.1	Democratic Republic of the Congo	SRR32625613	2.5123 S 28.8480 E	Democratic Republic of the Congo	Central Africa			Clinical (Human)	Human	Clinical	2023
GCA_048869705.1	SAMN47280032	NA	PDT002663507.1	Democratic Republic of the Congo	SRR32625606	2.5123 S 28.8480 E	Democratic Republic of the Congo	Central Africa			Clinical (Human)	Human	Clinical	2020
GCA_048869725.1	SAMN47280160	NA	PDT002663504.1	Democratic Republic of the Congo	SRR32625603	2.5123 S 28.8480 E	Democratic Republic of the Congo	Central Africa			Clinical (Human)	Human	Clinical	2023
GCA_048869745.1	SAMN47280159	NA	PDT002663505.1	Democratic Republic of the Congo	SRR32625604	2.5123 S 28.8480 E	Democratic Republic of the Congo	Central Africa			Clinical (Human)	Human	Clinical	2023
GCA_048869765.1	SAMN47280165	NA	PDT002663499.1	Democratic Republic of the Congo	SRR32625598	2.5123 S 28.8480 E	Democratic Republic of the Congo	Central Africa			Clinical (Human)	Human	Clinical	2023
GCA_048869785.1	SAMN47280166	NA	PDT002663498.1	Democratic Republic of the Congo	SRR32625597	2.5123 S 28.8480 E	Democratic Republic of the Congo	Central Africa			Clinical (Human)	Human	Clinical	2023
GCA_048869805.1	SAMN47280167	NA	PDT002663497.1	Democratic Republic of the Congo	SRR32625596	2.5123 S 28.8480 E	Democratic Republic of the Congo	Central Africa			Clinical (Human)	Human	Clinical	2023
GCA_048869825.1	SAMN47280033	NA	PDT002663496.1	Democratic Republic of the Congo	SRR32625595	2.5123 S 28.8480 E	Democratic Republic of the Congo	Central Africa			Clinical (Human)	Human	Clinical	2020
GCA_048869845.1	SAMN47280170	NA	PDT002663493.1	Democratic Republic of the Congo	SRR32625592	2.5123 S 28.8480 E	Democratic Republic of the Congo	Central Africa			Clinical (Human)	Human	Clinical	2023
GCA_048869865.1	SAMN47280168	NA	PDT002663495.1	Democratic Republic of the Congo	SRR32625594	2.5123 S 28.8480 E	Democratic Republic of the Congo	Central Africa			Clinical (Human)	Human	Clinical	2023
GCA_048869885.1	SAMN47280172	NA	PDT002663491.1	Democratic Republic of the Congo	SRR32625590	2.5123 S 28.8480 E	Democratic Republic of the Congo	Central Africa			Clinical (Human)	Human	Clinical	2023
GCA_048869905.1	SAMN47280260	NA	PDT002663489.1	Democratic Republic of the Congo	SRR32625588	2.5123 S 28.8480 E	Democratic Republic of the Congo	Central Africa			Clinical (Human)	Human	Clinical	2020
GCA_048869925.1	SAMN47280262	NA	PDT002663487.1	Democratic Republic of the Congo	SRR32625586	2.5123 S 28.8480 E	Democratic Republic of the Congo	Central Africa			Clinical (Human)	Human	Clinical	2020
GCA_048869945.1	SAMN47280264	NA	PDT002663485.1	Democratic Republic of the Congo	SRR32625584	2.5123 S 28.8480 E	Democratic Republic of the Congo	Central Africa			Clinical (Human)	Human	Clinical	2020
GCA_048869965.1	SAMN47280263	NA	PDT002663486.1	Democratic Republic of the Congo	SRR32625585	2.5123 S 28.8480 E	Democratic Republic of the Congo	Central Africa			Clinical (Human)	Human	Clinical	2020
GCA_048869985.1	SAMN47280265	NA	PDT002663484.1	Democratic Republic of the Congo	SRR32625583	2.5123 S 28.8480 E	Democratic Republic of the Congo	Central Africa			Environmental (Water)		Environmental	2020
GCA_048870005.1	SAMN47280043	NA	PDT002663481.1	Democratic Republic of the Congo	SRR32625580	2.5123 S 28.8480 E	Democratic Republic of the Congo	Central Africa			Clinical (Human)	Human	Clinical	2020
GCA_048870025.1	SAMN47280268	NA	PDT002663480.1	Democratic Republic of the Congo	SRR32625579	2.5123 S 28.8480 E	Democratic Republic of the Congo	Central Africa			Environmental (Water)		Environmental	2023
GCA_048870045.1	SAMN47280271	NA	PDT002663477.1	Democratic Republic of the Congo	SRR32625576	2.5123 S 28.8480 E	Democratic Republic of the Congo	Central Africa			Environmental (Water)		Environmental	2023
GCA_048870065.1	SAMN47280044	NA	PDT002663475.1	Democratic Republic of the Congo	SRR32625574	2.5123 S 28.8480 E	Democratic Republic of the Congo	Central Africa			Clinical (Human)	Human	Clinical	2020
GCA_048870085.1	SAMN47280045	NA	PDT002663474.1	Democratic Republic of the Congo	SRR32625573	2.5123 S 28.8480 E	Democratic Republic of the Congo	Central Africa			Clinical (Human)	Human	Clinical	2020
GCA_048870105.1	SAMN47280046	NA	PDT002663473.1	Democratic Republic of the Congo	SRR32625572	2.5123 S 28.8480 E	Democratic Republic of the Congo	Central Africa			Clinical (Human)	Human	Clinical	2020
GCA_048870125.1	SAMN47280047	NA	PDT002663472.1	Democratic Republic of the Congo	SRR32625571	2.5123 S 28.8480 E	Democratic Republic of the Congo	Central Africa			Clinical (Human)	Human	Clinical	2020
GCA_048870145.1	SAMN47280021	NA	PDT002663471.1	Democratic Republic of the Congo	SRR32625570	2.5123 S 28.8480 E	Democratic Republic of the Congo	Central Africa			Clinical (Human)	Human	Clinical	2020
GCA_048870165.1	SAMN47280049	NA	PDT002663469.1	Democratic Republic of the Congo	SRR32625568	2.5123 S 28.8480 E	Democratic Republic of the Congo	Central Africa			Clinical (Human)	Human	Clinical	2020
GCA_048870185.1	SAMN47280048	NA	PDT002663470.1	Democratic Republic of the Congo	SRR32625569	2.5123 S 28.8480 E	Democratic Republic of the Congo	Central Africa			Clinical (Human)	Human	Clinical	2020
GCA_048870205.1	SAMN47280050	NA	PDT002663468.1	Democratic Republic of the Congo	SRR32625567	2.5123 S 28.8480 E	Democratic Republic of the Congo	Central Africa			Clinical (Human)	Human	Clinical	2020
GCA_048870225.1	SAMN47280053	NA	PDT002663465.1	Democratic Republic of the Congo	SRR32625564	2.5123 S 28.8480 E	Democratic Republic of the Congo	Central Africa			Clinical (Human)	Human	Clinical	2020
GCA_048870245.1	SAMN47280054	NA	PDT002663464.1	Democratic Republic of the Congo	SRR32625563	2.5123 S 28.8480 E	Democratic Republic of the Congo	Central Africa			Clinical (Human)	Human	Clinical	2020
GCA_048870265.1	SAMN47280055	NA	PDT002663463.1	Democratic Republic of the Congo	SRR32625562	2.5123 S 28.8480 E	Democratic Republic of the Congo	Central Africa			Clinical (Human)	Human	Clinical	2020
GCA_048870285.1	SAMN47280056	NA	PDT002663462.1	Democratic Republic of the Congo	SRR32625561	2.5123 S 28.8480 E	Democratic Republic of the Congo	Central Africa			Clinical (Human)	Human	Clinical	2020
GCA_048870305.1	SAMN47280058	NA	PDT002663459.1	Democratic Republic of the Congo	SRR32625558	2.5123 S 28.8480 E	Democratic Republic of the Congo	Central Africa			Clinical (Human)	Human	Clinical	2020
GCA_048870325.1	SAMN47280059	NA	PDT002663458.1	Democratic Republic of the Congo	SRR32625557	2.5123 S 28.8480 E	Democratic Republic of the Congo	Central Africa			Clinical (Human)	Human	Clinical	2020
GCA_048870345.1	SAMN47280176	NA	PDT002663455.1	Democratic Republic of the Congo	SRR32625554	2.5123 S 28.8480 E	Democratic Republic of the Congo	Central Africa			Clinical (Human)	Human	Clinical	2023
GCA_048870365.1	SAMN47280174	NA	PDT002663457.1	Democratic Republic of the Congo	SRR32625556	2.5123 S 28.8480 E	Democratic Republic of the Congo	Central Africa			Clinical (Human)	Human	Clinical	2023
GCA_048870385.1	SAMN47280177	NA	PDT002663454.1	Democratic Republic of the Congo	SRR32625553	2.5123 S 28.8480 E	Democratic Republic of the Congo	Central Africa			Clinical (Human)	Human	Clinical	2023
GCA_048870405.1	SAMN47280034	NA	PDT002663453.1	Democratic Republic of the Congo	SRR32625552	2.5123 S 28.8480 E	Democratic Republic of the Congo	Central Africa			Clinical (Human)	Human	Clinical	2020
GCA_048870425.1	SAMN47280178	NA	PDT002663452.1	Democratic Republic of the Congo	SRR32625551	2.5123 S 28.8480 E	Democratic Republic of the Congo	Central Africa			Clinical (Human)	Human	Clinical	2023
GCA_048870445.1	SAMN47280180	NA	PDT002663450.1	Democratic Republic of the Congo	SRR32625549	2.5123 S 28.8480 E	Democratic Republic of the Congo	Central Africa			Clinical (Human)	Human	Clinical	2023
GCA_048870485.1	SAMN47280183	NA	PDT002663447.1	Democratic Republic of the Congo	SRR32625546	2.5123 S 28.8480 E	Democratic Republic of the Congo	Central Africa			Clinical (Human)	Human	Clinical	2023
GCA_048870505.1	SAMN47280186	NA	PDT002663444.1	Democratic Republic of the Congo	SRR32625543	2.5123 S 28.8480 E	Democratic Republic of the Congo	Central Africa			Clinical (Human)	Human	Clinical	2023
GCA_048870525.1	SAMN47280184	NA	PDT002663446.1	Democratic Republic of the Congo	SRR32625545	2.5123 S 28.8480 E	Democratic Republic of the Congo	Central Africa			Clinical (Human)	Human	Clinical	2023
GCA_048870545.1	SAMN47280035	NA	PDT002663442.1	Democratic Republic of the Congo	SRR32625541	2.5123 S 28.8480 E	Democratic Republic of the Congo	Central Africa			Clinical (Human)	Human	Clinical	2020
GCA_048870565.1	SAMN47280188	NA	PDT002663441.1	Democratic Republic of the Congo	SRR32625540	2.5123 S 28.8480 E	Democratic Republic of the Congo	Central Africa			Clinical (Human)	Human	Clinical	2023
GCA_048870585.1	SAMN47280190	NA	PDT002663439.1	Democratic Republic of the Congo	SRR32625538	2.5123 S 28.8480 E	Democratic Republic of the Congo	Central Africa			Clinical (Human)	Human	Clinical	2023
GCA_048870605.1	SAMN47280189	NA	PDT002663440.1	Democratic Republic of the Congo	SRR32625539	2.5123 S 28.8480 E	Democratic Republic of the Congo	Central Africa			Clinical (Human)	Human	Clinical	2023
GCA_048870625.1	SAMN47280191	NA	PDT002663438.1	Democratic Republic of the Congo	SRR32625537	2.5123 S 28.8480 E	Democratic Republic of the Congo	Central Africa			Clinical (Human)	Human	Clinical	2023
GCA_048870645.1	SAMN47280192	NA	PDT002663437.1	Democratic Republic of the Congo	SRR32625536	2.5123 S 28.8480 E	Democratic Republic of the Congo	Central Africa			Clinical (Human)	Human	Clinical	2023
GCA_048870665.1	SAMN47280194	NA	PDT002663435.1	Democratic Republic of the Congo	SRR32625534	2.5123 S 28.8480 E	Democratic Republic of the Congo	Central Africa			Clinical (Human)	Human	Clinical	2023
GCA_048870685.1	SAMN47280196	NA	PDT002663433.1	Democratic Republic of the Congo	SRR32625532	2.5123 S 28.8480 E	Democratic Republic of the Congo	Central Africa			Clinical (Human)	Human	Clinical	2021
GCA_048870705.1	SAMN47280197	NA	PDT002663432.1	Democratic Republic of the Congo	SRR32625531	2.5123 S 28.8480 E	Democratic Republic of the Congo	Central Africa			Clinical (Human)	Human	Clinical	2022
GCA_048870725.1	SAMN47280036	NA	PDT002663431.1	Democratic Republic of the Congo	SRR32625530	2.5123 S 28.8480 E	Democratic Republic of the Congo	Central Africa			Clinical (Human)	Human	Clinical	2020
GCA_048870745.1	SAMN47280198	NA	PDT002663430.1	Democratic Republic of the Congo	SRR32625529	2.5123 S 28.8480 E	Democratic Republic of the Congo	Central Africa			Clinical (Human)	Human	Clinical	2021
GCA_048870765.1	SAMN47280199	NA	PDT002663429.1	Democratic Republic of the Congo	SRR32625528	2.5123 S 28.8480 E	Democratic Republic of the Congo	Central Africa			Clinical (Human)	Human	Clinical	2022
GCA_048870785.1	SAMN47280202	NA	PDT002663426.1	Democratic Republic of the Congo	SRR32625525	2.5123 S 28.8480 E	Democratic Republic of the Congo	Central Africa			Clinical (Human)	Human	Clinical	2023
GCA_048870805.1	SAMN47280061	NA	PDT002663424.1	Democratic Republic of the Congo	SRR32625523	2.5123 S 28.8480 E	Democratic Republic of the Congo	Central Africa			Clinical (Human)	Human	Clinical	2020
GCA_048870825.1	SAMN47280062	NA	PDT002663423.1	Democratic Republic of the Congo	SRR32625522	2.5123 S 28.8480 E	Democratic Republic of the Congo	Central Africa			Clinical (Human)	Human	Clinical	2020
GCA_048870845.1	SAMN47280063	NA	PDT002663422.1	Democratic Republic of the Congo	SRR32625521	2.5123 S 28.8480 E	Democratic Republic of the Congo	Central Africa			Clinical (Human)	Human	Clinical	2020
GCA_048870865.1	SAMN47280065	NA	PDT002663420.1	Democratic Republic of the Congo	SRR32625519	2.5123 S 28.8480 E	Democratic Republic of the Congo	Central Africa			Clinical (Human)	Human	Clinical	2020
GCA_048870885.1	SAMN47280067	NA	PDT002663418.1	Democratic Republic of the Congo	SRR32625517	2.5123 S 28.8480 E	Democratic Republic of the Congo	Central Africa			Clinical (Human)	Human	Clinical	2020
GCA_048870905.1	SAMN47280023	NA	PDT002663417.1	Democratic Republic of the Congo	SRR32625516	2.5123 S 28.8480 E	Democratic Republic of the Congo	Central Africa			Clinical (Human)	Human	Clinical	2020
GCA_048870925.1	SAMN47280069	NA	PDT002663415.1	Democratic Republic of the Congo	SRR32625514	2.5123 S 28.8480 E	Democratic Republic of the Congo	Central Africa			Clinical (Human)	Human	Clinical	2020
GCA_048870945.1	SAMN47280070	NA	PDT002663414.1	Democratic Republic of the Congo	SRR32625513	2.5123 S 28.8480 E	Democratic Republic of the Congo	Central Africa			Clinical (Human)	Human	Clinical	2020
GCA_048870965.1	SAMN47280071	NA	PDT002663413.1	Democratic Republic of the Congo	SRR32625512	2.5123 S 28.8480 E	Democratic Republic of the Congo	Central Africa			Clinical (Human)	Human	Clinical	2020
GCA_048871005.1	SAMN47280074	NA	PDT002663410.1	Democratic Republic of the Congo	SRR32625509	2.5123 S 28.8480 E	Democratic Republic of the Congo	Central Africa			Clinical (Human)	Human	Clinical	2020
GCA_048871025.1	SAMN47280075	NA	PDT002663409.1	Democratic Republic of the Congo	SRR32625508	2.5123 S 28.8480 E	Democratic Republic of the Congo	Central Africa			Clinical (Human)	Human	Clinical	2020
GCA_048871045.1	SAMN47280077	NA	PDT002663407.1	Democratic Republic of the Congo	SRR32625506	2.5123 S 28.8480 E	Democratic Republic of the Congo	Central Africa			Clinical (Human)	Human	Clinical	2020
GCA_048871065.1	SAMN47280024	NA	PDT002663406.1	Democratic Republic of the Congo	SRR32625505	2.5123 S 28.8480 E	Democratic Republic of the Congo	Central Africa			Clinical (Human)	Human	Clinical	2020
GCA_048871085.1	SAMN47280080	NA	PDT002663403.1	Democratic Republic of the Congo	SRR32625502	2.5123 S 28.8480 E	Democratic Republic of the Congo	Central Africa			Clinical (Human)	Human	Clinical	2020
GCA_048871125.1	SAMN47280085	NA	PDT002663398.1	Democratic Republic of the Congo	SRR32625497	2.5123 S 28.8480 E	Democratic Republic of the Congo	Central Africa			Clinical (Human)	Human	Clinical	2020
GCA_048871145.1	SAMN47280088	NA	PDT002663394.1	Democratic Republic of the Congo	SRR32625493	2.5123 S 28.8480 E	Democratic Republic of the Congo	Central Africa			Clinical (Human)	Human	Clinical	2020
GCA_048871165.1	SAMN47280231	NA	PDT002663393.1	Democratic Republic of the Congo	SRR32625492	2.5123 S 28.8480 E	Democratic Republic of the Congo	Central Africa			Clinical (Human)	Human	Clinical	2023
GCA_048871185.1	SAMN47280233	NA	PDT002663391.1	Democratic Republic of the Congo	SRR32625490	2.5123 S 28.8480 E	Democratic Republic of the Congo	Central Africa			Clinical (Human)	Human	Clinical	2022
GCA_048871205.1	SAMN47280232	NA	PDT002663392.1	Democratic Republic of the Congo	SRR32625491	2.5123 S 28.8480 E	Democratic Republic of the Congo	Central Africa			Clinical (Human)	Human	Clinical	2023
GCA_048871225.1	SAMN47280236	NA	PDT002663388.1	Democratic Republic of the Congo	SRR32625487	2.5123 S 28.8480 E	Democratic Republic of the Congo	Central Africa			Clinical (Human)	Human	Clinical	2022
GCA_048871245.1	SAMN47280040	NA	PDT002663386.1	Democratic Republic of the Congo	SRR32625485	2.5123 S 28.8480 E	Democratic Republic of the Congo	Central Africa			Clinical (Human)	Human	Clinical	2020
GCA_048871265.1	SAMN47280238	NA	PDT002663385.1	Democratic Republic of the Congo	SRR32625484	2.5123 S 28.8480 E	Democratic Republic of the Congo	Central Africa			Clinical (Human)	Human	Clinical	2022
GCA_048871285.1	SAMN47280242	NA	PDT002663381.1	Democratic Republic of the Congo	SRR32625480	2.5123 S 28.8480 E	Democratic Republic of the Congo	Central Africa			Clinical (Human)	Human	Clinical	2023
GCA_048871305.1	SAMN47280243	NA	PDT002663380.1	Democratic Republic of the Congo	SRR32625479	2.5123 S 28.8480 E	Democratic Republic of the Congo	Central Africa			Clinical (Human)	Human	Clinical	2023
GCA_048871325.1	SAMN47280244	NA	PDT002663379.1	Democratic Republic of the Congo	SRR32625478	2.5123 S 28.8480 E	Democratic Republic of the Congo	Central Africa			Clinical (Human)	Human	Clinical	2023
GCA_048871345.1	SAMN47280041	NA	PDT002663375.1	Democratic Republic of the Congo	SRR32625474	2.5123 S 28.8480 E	Democratic Republic of the Congo	Central Africa			Clinical (Human)	Human	Clinical	2020
GCA_048871365.1	SAMN47280248	NA	PDT002663374.1	Democratic Republic of the Congo	SRR32625473	2.5123 S 28.8480 E	Democratic Republic of the Congo	Central Africa			Clinical (Human)	Human	Clinical	2023
GCA_048871385.1	SAMN47280249	NA	PDT002663373.1	Democratic Republic of the Congo	SRR32625472	2.5123 S 28.8480 E	Democratic Republic of the Congo	Central Africa			Clinical (Human)	Human	Clinical	2023
GCA_048871405.1	SAMN47280251	NA	PDT002663371.1	Democratic Republic of the Congo	SRR32625470	2.5123 S 28.8480 E	Democratic Republic of the Congo	Central Africa			Clinical (Human)	Human	Clinical	2020
GCA_048871425.1	SAMN47280250	NA	PDT002663372.1	Democratic Republic of the Congo	SRR32625471	2.5123 S 28.8480 E	Democratic Republic of the Congo	Central Africa			Clinical (Human)	Human	Clinical	2020
GCA_048871445.1	SAMN47280252	NA	PDT002663370.1	Democratic Republic of the Congo	SRR32625469	2.5123 S 28.8480 E	Democratic Republic of the Congo	Central Africa			Clinical (Human)	Human	Clinical	2020
GCA_048871565.1	SAMN47280254	NA	PDT002663368.1	Democratic Republic of the Congo	SRR32625467	2.5123 S 28.8480 E	Democratic Republic of the Congo	Central Africa			Clinical (Human)	Human	Clinical	2020
GCA_048871585.1	SAMN47280253	NA	PDT002663369.1	Democratic Republic of the Congo	SRR32625468	2.5123 S 28.8480 E	Democratic Republic of the Congo	Central Africa			Clinical (Human)	Human	Clinical	2020
GCA_048871605.1	SAMN47280256	NA	PDT002663366.1	Democratic Republic of the Congo	SRR32625465	2.5123 S 28.8480 E	Democratic Republic of the Congo	Central Africa			Clinical (Human)	Human	Clinical	2020
GCA_048871625.1	SAMN47280255	NA	PDT002663367.1	Democratic Republic of the Congo	SRR32625466	2.5123 S 28.8480 E	Democratic Republic of the Congo	Central Africa			Clinical (Human)	Human	Clinical	2020
GCA_048871645.1	SAMN47280259	NA	PDT002663362.1	Democratic Republic of the Congo	SRR32625461	2.5123 S 28.8480 E	Democratic Republic of the Congo	Central Africa			Clinical (Human)	Human	Clinical	2020
GCA_048871665.1	SAMN47280092	NA	PDT002663358.1	Democratic Republic of the Congo	SRR32625457	2.5123 S 28.8480 E	Democratic Republic of the Congo	Central Africa			Clinical (Human)	Human	Clinical	2020
GCA_048871685.1	SAMN47280093	NA	PDT002663357.1	Democratic Republic of the Congo	SRR32625456	2.5123 S 28.8480 E	Democratic Republic of the Congo	Central Africa			Clinical (Human)	Human	Clinical	2020
GCA_048871705.1	SAMN47280042	NA	PDT002663364.1	Democratic Republic of the Congo	SRR32625463	2.5123 S 28.8480 E	Democratic Republic of the Congo	Central Africa			Clinical (Human)	Human	Clinical	2020
GCA_048871725.1	SAMN47280089	NA	PDT002663361.1	Democratic Republic of the Congo	SRR32625460	2.5123 S 28.8480 E	Democratic Republic of the Congo	Central Africa			Clinical (Human)	Human	Clinical	2020
GCA_048871745.1	SAMN47280094	NA	PDT002663356.1	Democratic Republic of the Congo	SRR32625455	2.5123 S 28.8480 E	Democratic Republic of the Congo	Central Africa			Clinical (Human)	Human	Clinical	2020
GCA_048871765.1	SAMN47280096	NA	PDT002663354.1	Democratic Republic of the Congo	SRR32625453	2.5123 S 28.8480 E	Democratic Republic of the Congo	Central Africa			Clinical (Human)	Human	Clinical	2020
GCA_048871785.1	SAMN47280097	NA	PDT002663353.1	Democratic Republic of the Congo	SRR32625452	2.5123 S 28.8480 E	Democratic Republic of the Congo	Central Africa			Clinical (Human)	Human	Clinical	2020
GCA_048871805.1	SAMN47280026	NA	PDT002663352.1	Democratic Republic of the Congo	SRR32625451	2.5123 S 28.8480 E	Democratic Republic of the Congo	Central Africa			Clinical (Human)	Human	Clinical	2020
GCA_048871825.1	SAMN47280099	NA	PDT002663350.1	Democratic Republic of the Congo	SRR32625449	2.5123 S 28.8480 E	Democratic Republic of the Congo	Central Africa			Clinical (Human)	Human	Clinical	2021
GCA_048871845.1	SAMN47280100	NA	PDT002663349.1	Democratic Republic of the Congo	SRR32625448	2.5123 S 28.8480 E	Democratic Republic of the Congo	Central Africa			Clinical (Human)	Human	Clinical	2021
GCA_048871865.1	SAMN47280104	NA	PDT002663345.1	Democratic Republic of the Congo	SRR32625444	2.5123 S 28.8480 E	Democratic Republic of the Congo	Central Africa			Clinical (Human)	Human	Clinical	2021
GCA_048871885.1	SAMN47280105	NA	PDT002663344.1	Democratic Republic of the Congo	SRR32625443	2.5123 S 28.8480 E	Democratic Republic of the Congo	Central Africa			Clinical (Human)	Human	Clinical	2021
GCA_048871905.1	SAMN47280108	NA	PDT002663340.1	Democratic Republic of the Congo	SRR32625439	2.5123 S 28.8480 E	Democratic Republic of the Congo	Central Africa			Clinical (Human)	Human	Clinical	2021
GCA_048871925.1	SAMN47280109	NA	PDT002663339.1	Democratic Republic of the Congo	SRR32625438	2.5123 S 28.8480 E	Democratic Republic of the Congo	Central Africa			Clinical (Human)	Human	Clinical	2021
GCA_048871945.1	SAMN47280027	NA	PDT002663341.1	Democratic Republic of the Congo	SRR32625440	2.5123 S 28.8480 E	Democratic Republic of the Congo	Central Africa			Clinical (Human)	Human	Clinical	2020
GCA_048871965.1	SAMN47280111	NA	PDT002663337.1	Democratic Republic of the Congo	SRR32625436	2.5123 S 28.8480 E	Democratic Republic of the Congo	Central Africa			Clinical (Human)	Human	Clinical	2021
GCA_048871985.1	SAMN47280110	NA	PDT002663338.1	Democratic Republic of the Congo	SRR32625437	2.5123 S 28.8480 E	Democratic Republic of the Congo	Central Africa			Clinical (Human)	Human	Clinical	2021
GCA_048872005.1	SAMN47280112	NA	PDT002663336.1	Democratic Republic of the Congo	SRR32625435	2.5123 S 28.8480 E	Democratic Republic of the Congo	Central Africa			Clinical (Human)	Human	Clinical	2022
GCA_048872025.1	SAMN47280116	NA	PDT002663332.1	Democratic Republic of the Congo	SRR32625431	2.5123 S 28.8480 E	Democratic Republic of the Congo	Central Africa			Clinical (Human)	Human	Clinical	2022
GCA_048872045.1	SAMN47280117	NA	PDT002663331.1	Democratic Republic of the Congo	SRR32625430	2.5123 S 28.8480 E	Democratic Republic of the Congo	Central Africa			Clinical (Human)	Human	Clinical	2022
GCA_048946515.1	SAMN47280217	NA	PDT002663538.1	Democratic Republic of the Congo	SRR32625637	2.5123 S 28.8480 E	Democratic Republic of the Congo	Central Africa			Clinical (Human)	Human	Clinical	2022
GCA_048946535.1	SAMN47280141	NA	PDT002663557.1	Democratic Republic of the Congo	SRR32625656	2.5123 S 28.8480 E	Democratic Republic of the Congo	Central Africa			Clinical (Human)	Human	Clinical	2023
GCA_048946555.1	SAMN47280223	NA	PDT002663530.1	Democratic Republic of the Congo	SRR32625629	2.5123 S 28.8480 E	Democratic Republic of the Congo	Central Africa			Clinical (Human)	Human	Clinical	2022
GCA_048946575.1	SAMN47280052	NA	PDT002663466.1	Democratic Republic of the Congo	SRR32625565	2.5123 S 28.8480 E	Democratic Republic of the Congo	Central Africa			Clinical (Human)	Human	Clinical	2020
GCA_048946635.1	SAMN47280179	NA	PDT002663451.1	Democratic Republic of the Congo	SRR32625550	2.5123 S 28.8480 E	Democratic Republic of the Congo	Central Africa			Clinical (Human)	Human	Clinical	2023
GCA_048947035.1	SAMN47280073	NA	PDT002663411.1	Democratic Republic of the Congo	SRR32625510	2.5123 S 28.8480 E	Democratic Republic of the Congo	Central Africa			Clinical (Human)	Human	Clinical	2020
GCA_048947055.1	SAMN47280078	NA	PDT002663405.1	Democratic Republic of the Congo	SRR32625504	2.5123 S 28.8480 E	Democratic Republic of the Congo	Central Africa			Clinical (Human)	Human	Clinical	2020
GCA_048947075.1	SAMN47280025	NA	PDT002663395.1	Democratic Republic of the Congo	SRR32625494	2.5123 S 28.8480 E	Democratic Republic of the Congo	Central Africa			Clinical (Human)	Human	Clinical	2020
GCA_048947115.1	SAMN47280091	NA	PDT002663359.1	Democratic Republic of the Congo	SRR32625458	2.5123 S 28.8480 E	Democratic Republic of the Congo	Central Africa			Clinical (Human)	Human	Clinical	2020
GCA_049209515.1	SAMN47280173	NA	PDT002663490.1	Democratic Republic of the Congo	SRR32625589	2.5123 S 28.8480 E	Democratic Republic of the Congo	Central Africa			Clinical (Human)	Human	Clinical	2023
GCA_049209535.1	SAMN47280261	NA	PDT002663488.1	Democratic Republic of the Congo	SRR32625587	2.5123 S 28.8480 E	Democratic Republic of the Congo	Central Africa			Clinical (Human)	Human	Clinical	2020
GCA_049264165.1	SAMN47280230	NA	PDT002663522.1	Democratic Republic of the Congo	SRR32625621	2.5123 S 28.8480 E	Democratic Republic of the Congo	Central Africa			Clinical (Human)	Human	Clinical	2023
GCA_049264185.1	SAMN47280152	NA	PDT002663513.1	Democratic Republic of the Congo	SRR32625612	2.5123 S 28.8480 E	Democratic Republic of the Congo	Central Africa			Clinical (Human)	Human	Clinical	2023
GCA_049264205.1	SAMN47280266	NA	PDT002663483.1	Democratic Republic of the Congo	SRR32625582	2.5123 S 28.8480 E	Democratic Republic of the Congo	Central Africa			Environmental (Water)		Environmental	2020
GCA_049264225.1	SAMN47280162	NA	PDT002663502.1	Democratic Republic of the Congo	SRR32625601	2.5123 S 28.8480 E	Democratic Republic of the Congo	Central Africa			Clinical (Human)	Human	Clinical	2023
GCA_049264245.1	SAMN47280267	NA	PDT002663482.1	Democratic Republic of the Congo	SRR32625581	2.5123 S 28.8480 E	Democratic Republic of the Congo	Central Africa			Environmental (Water)		Environmental	2020
GCA_049264265.1	SAMN47280175	NA	PDT002663456.1	Democratic Republic of the Congo	SRR32625555	2.5123 S 28.8480 E	Democratic Republic of the Congo	Central Africa			Clinical (Human)	Human	Clinical	2023
GCA_049264285.1	SAMN47280022	NA	PDT002663460.1	Democratic Republic of the Congo	SRR32625559	2.5123 S 28.8480 E	Democratic Republic of the Congo	Central Africa			Clinical (Human)	Human	Clinical	2020
GCA_049264305.1	SAMN47280064	NA	PDT002663421.1	Democratic Republic of the Congo	SRR32625520	2.5123 S 28.8480 E	Democratic Republic of the Congo	Central Africa			Clinical (Human)	Human	Clinical	2020
GCA_049268125.1	SAMN47200128	YA00222092-VCH	PDT002662933.1	South Africa	SRR32636789	NA	South Africa	Southern Africa			Food/Aquatic Animal		Environmental	2020
GCA_049268165.1	SAMN47200131	YA00227481-VCH	PDT002662932.1	South Africa	SRR32636788	NA	South Africa	Southern Africa			Environmental (Water)		Environmental	2020
GCA_049268185.1	SAMN47200130	YA00224848-VCH	PDT002662931.1	South Africa	SRR32636787	NA	South Africa	Southern Africa			Food/Aquatic Animal		Environmental	2020
GCA_049268205.1	SAMN47200125	YA00222089-VCH	PDT002662930.1	South Africa	SRR32636786	NA	South Africa	Southern Africa			Food/Aquatic Animal		Environmental	2020
GCA_049268225.1	SAMN47200132	YA00227488-VCH	PDT002662929.1	South Africa	SRR32636784	NA	South Africa	Southern Africa			Environmental (Water)		Environmental	2020
GCA_049268265.1	SAMN47200126	YA00222090-VCH	PDT002662926.1	South Africa	SRR32636781	NA	South Africa	Southern Africa			Food/Aquatic Animal		Environmental	2020
GCA_049268305.1	SAMN47200103	YA00191717-VCH	PDT002662913.1	South Africa	SRR32636331	NA	South Africa	Southern Africa				Human	Clinical	2019
GCA_049268325.1	SAMN47200102	YA00191489-VCH	PDT002662912.1	South Africa	SRR32636330	NA	South Africa	Southern Africa				Human	Clinical	2019
GCA_049268345.1	SAMN47200105	YA00208753-VCH	PDT002662911.1	South Africa	SRR32636329	NA	South Africa	Southern Africa				Human	Clinical	2020
GCA_049268365.1	SAMN47200101	YA00175562-VCH	PDT002662910.1	South Africa	SRR32636328	NA	South Africa	Southern Africa				Human	Clinical	2019
GCA_049268385.1	SAMN47200121	YA00155149-VCH	PDT002662909.1	South Africa	SRR32636327	NA	South Africa	Southern Africa			Food/Aquatic Animal		Environmental	2019
GCA_049268405.1	SAMN47200100	YA00150653-VCH	PDT002662908.1	South Africa	SRR32636326	NA	South Africa	Southern Africa				Human	Clinical	2019
GCA_049268425.1	SAMN47200123	YA00169222-VCH	PDT002662907.1	South Africa	SRR32636325	NA	South Africa	Southern Africa			Environmental (Water)		Environmental	2019
GCA_049268465.1	SAMN47200120	OA02024540-VCH	PDT002662891.1	South Africa	SRR32636178	NA	South Africa	Southern Africa			Environmental (Water)		Environmental	2020
GCA_049268485.1	SAMN47200115	OA01832281-VCH	PDT002662888.1	South Africa	SRR32636175	NA	South Africa	Southern Africa			Environmental (Water)		Environmental	2019
GCA_049268505.1	SAMN47200114	OA01832280-VCH	PDT002662887.1	South Africa	SRR32636174	NA	South Africa	Southern Africa			Environmental (Water)		Environmental	2019
GCA_049268525.1	SAMN47200118	OA01842978-VCH	PDT002662886.1	South Africa	SRR32636173	NA	South Africa	Southern Africa			Environmental (Water)		Environmental	2020
GCA_049268545.1	SAMN47200129	YA00224846-VCH	PDT002662928.1	South Africa	SRR32636783	NA	South Africa	Southern Africa			Food/Aquatic Animal		Environmental	2020
GCA_049269585.1	SAMN47200122	YA00162972-VCH	PDT002662905.1	South Africa	SRR32636323	NA	South Africa	Southern Africa			Food/Aquatic Animal		Environmental	2019
GCA_049269605.1	SAMN47200112	OA01713966-VCH	PDT002662890.1	South Africa	SRR32636177	NA	South Africa	Southern Africa			Environmental (Water)		Environmental	2019
GCA_049269625.1	SAMN47200119	OA02017387-VCH	PDT002662889.1	South Africa	SRR32636176	NA	South Africa	Southern Africa			Environmental (Water)		Environmental	2020
GCA_049269645.1	SAMN47200113	OA01817442-VCH	PDT002662885.1	South Africa	SRR32636172	NA	South Africa	Southern Africa			Environmental (Water)		Environmental	2019
GCA_049269665.1	SAMN47200116	OA01832288-VCH	PDT002662884.1	South Africa	SRR32636171	NA	South Africa	Southern Africa			Environmental (Water)		Environmental	2019
GCA_049269705.1	SAMN47200117	OA01832296-VCH	PDT002662882.1	South Africa	SRR32636169	NA	South Africa	Southern Africa			Environmental (Water)		Environmental	2019
GCA_049269725.1	SAMN47200109	HM00176690-VCH	PDT002662850.1	South Africa	SRR32636114	NA	South Africa	Southern Africa			Environmental (Water)		Environmental	2020
GCA_049269745.1	SAMN47200110	HM00176691-VCH	PDT002662849.1	South Africa	SRR32636113	NA	South Africa	Southern Africa			Environmental (Water)		Environmental	2020
GCA_049269765.1	SAMN47200099	ED01922498-VCH	PDT002662848.1	South Africa	SRR32636112	NA	South Africa	Southern Africa				Human	Clinical	2019
GCA_049269805.1	SAMN47200106	CF00214290-VCH	PDT002662785.1	South Africa	SRR32634051	NA	South Africa	Southern Africa			Environmental (Water)		Environmental	2020
GCA_051407335.1	SAMEA118764640	YA00588188	PDT002838207.1	Namibia	ERR15283609	NA	Namibia	Southern Africa			Clinical (Human)		Clinical	2025
GCA_051426345.1	SAMEA118764641	YA00588185	PDT002839755.1	Namibia	ERR15283610	NA	Namibia	Southern Africa			Clinical (Human)		Clinical	2025
GCA_051436305.1	SAMEA118764639	YA00588192	PDT002838451.1	Namibia	ERR15283608	NA	Namibia	Southern Africa			Clinical (Human)		Clinical	2025
GCA_051438485.1	SAMEA118764638	YA00587718	PDT002838282.1	Namibia	ERR15283607	NA	Namibia	Southern Africa			Clinical (Human)		Clinical	2025
GCA_051438505.1	SAMEA118764642	YA00587716	PDT002838283.1	Namibia	ERR15283611	NA	Namibia	Southern Africa			Clinical (Human)		Clinical	2025
GCA_051566365.1	SAMEA118794524	YA00595961	PDT002854215.1	South Africa	ERR15334598	NA	South Africa	Southern Africa			Clinical (Human)		Clinical	2025
GCA_051947945.1	SAMEA7177423	YA00192016	PDT002876245.1	South Africa: KwaZulu-Natal	ERR4452320	NA	South Africa	Southern Africa		KwaZulu-Natal	Clinical (Human)		Clinical	2019
GCA_052180565.1	SAMN47379396	MLK123	PDT002890588.1	Kenya: Nairobi	SRR32909457	1.2774 S 36.9158 E	Kenya	East Africa		Nairobi	Clinical (Human)	Human	Clinical	2022
GCA_052180605.1	SAMN47379434	MLK127	PDT002890518.1	Kenya: Nairobi	SRR32860262	1.2483 S 36.9026 E	Kenya	East Africa		Nairobi	Clinical (Human)	Human	Clinical	2022
GCA_053942035.1	SAMEA120805151	YA00657808	PDT003026134.1	Namibia	ERR16009967	NA	Namibia	Southern Africa			Clinical (Human)		Clinical	2025
GCA_053944215.1	SAMEA120805150	YA00657818	PDT003026133.1	Namibia	ERR16009966	NA	Namibia	Southern Africa			Clinical (Human)		Clinical	2025
GCA_053944735.1	SAMEA120805153	YA00657807	PDT003026097.1	Namibia	ERR16009969	NA	Namibia	Southern Africa			Clinical (Human)		Clinical	2025
GCA_053944755.1	SAMEA120805152	YA00657811	PDT003026096.1	Namibia	ERR16009968	NA	Namibia	Southern Africa			Clinical (Human)		Clinical	2025
GCA_053958745.1	SAMEA120805154	YA00657817	PDT003026138.1	Namibia	ERR16009970	NA	Namibia	Southern Africa			Clinical (Human)		Clinical	2025
GCA_055690065.1	SAMN49722168	O1 El Tor	PDT003130156.1	Kenya	SRR34306375	0.0236 S 37.9062 E	Kenya	East Africa			Clinical (Human)	Human	Clinical	2017
ERR3980560	SAMEA6614422	NA	PDT000797862.1	Tanzania	ERR3980560	NA	Tanzania	East Africa			Environmental (Water)	Aquatic/Environmental		2019
SRR15192521	SAMN20305996	NA	PDT001138243.1	Democratic Republic of the Congo	SRR15192521	0.340827 S 29.761813 E	Democratic Republic of the Congo	Central Africa			Clinical (Human)	Human	Clinical	2015
ERR9795982	SAMEA13600379	NA	PDT001343570.1	Ghana	ERR9795982	not collected	Ghana	West Africa			Clinical (Human)	Human	Clinical	2011
ERR9808331	SAMEA13600382	NA	PDT001345084.1	Ghana	ERR9808331	not collected	Ghana	West Africa			Clinical (Human)	Human	Clinical	2011
ERR9808342	SAMEA13600393	NA	PDT001345085.1	Ghana	ERR9808342	not collected	Ghana	West Africa			Clinical (Human)	Human	Clinical	2011
ERR9808360	SAMEA13600411	NA	PDT001345086.1	Ghana	ERR9808360	not collected	Ghana	West Africa			Clinical (Human)	Human	Clinical	2014
ERR9808362	SAMEA13600413	NA	PDT001345087.1	Ghana	ERR9808362	not collected	Ghana	West Africa			Clinical (Human)	Human	Clinical	2014
ERR9808367	SAMEA13600418	NA	PDT001345088.1	Ghana	ERR9808367	not collected	Ghana	West Africa			Clinical (Human)	Human	Clinical	2014
ERR9808368	SAMEA13600419	NA	PDT001345089.1	Ghana	ERR9808368	not collected	Ghana	West Africa			Clinical (Human)	Human	Clinical	2014
ERR9808369	SAMEA13600420	NA	PDT001345090.1	Ghana	ERR9808369	not collected	Ghana	West Africa			Clinical (Human)	Human	Clinical	2014
ERR9808376	SAMEA13600427	NA	PDT001345091.1	Ghana	ERR9808376	not collected	Ghana	West Africa			Clinical (Human)	Human	Clinical	2014
ERR9808377	SAMEA13600428	NA	PDT001345092.1	Ghana	ERR9808377	not collected	Ghana	West Africa			Clinical (Human)	Human	Clinical	2014
ERR9808381	SAMEA13600432	NA	PDT001345093.1	Ghana	ERR9808381	not collected	Ghana	West Africa			Clinical (Human)	Human	Clinical	2014
ERR9808384	SAMEA13600435	NA	PDT001345094.1	Ghana	ERR9808384	not collected	Ghana	West Africa			Clinical (Human)	Human	Clinical	2014
ERR9808392	SAMEA13600443	NA	PDT001345095.1	Ghana	ERR9808392	not collected	Ghana	West Africa			Clinical (Human)	Human	Clinical	2014
ERR9808396	SAMEA13600447	NA	PDT001345096.1	Ghana	ERR9808396	not collected	Ghana	West Africa			Clinical (Human)	Human	Clinical	2014
ERR9808398	SAMEA13600449	NA	PDT001345277.1	Ghana	ERR9808398	not collected	Ghana	West Africa			Clinical (Human)	Human	Clinical	2014
ERR9808400	SAMEA13600451	NA	PDT001345278.1	Ghana	ERR9808400	not collected	Ghana	West Africa			Clinical (Human)	Human	Clinical	2014
ERR9808403	SAMEA13600454	NA	PDT001345279.1	Ghana	ERR9808403	not collected	Ghana	West Africa			Clinical (Human)	Human	Clinical	2014
ERR9808405	SAMEA13600456	NA	PDT001345280.1	Ghana	ERR9808405	not collected	Ghana	West Africa			Clinical (Human)	Human	Clinical	2014
ERR9808358	SAMEA13600409	NA	PDT001347043.1	Ghana	ERR9808358	not collected	Ghana	West Africa			Clinical (Human)	Human	Clinical	2014
ERR9808329	SAMEA13600380	NA	PDT001347184.1	Ghana	ERR9808329	not collected	Ghana	West Africa			Clinical (Human)	Human	Clinical	2011
ERR9808336	SAMEA13600387	NA	PDT001347185.1	Ghana	ERR9808336	not collected	Ghana	West Africa			Clinical (Human)	Human	Clinical	2011
ERR9808338	SAMEA13600389	NA	PDT001347186.1	Ghana	ERR9808338	not collected	Ghana	West Africa			Clinical (Human)	Human	Clinical	2011
ERR9808344	SAMEA13600395	NA	PDT001347187.1	Ghana	ERR9808344	not collected	Ghana	West Africa			Clinical (Human)	Human	Clinical	2012
ERR9808345	SAMEA13600396	NA	PDT001347188.1	Ghana	ERR9808345	not collected	Ghana	West Africa			Clinical (Human)	Human	Clinical	2012
ERR9808346	SAMEA13600397	NA	PDT001347189.1	Ghana	ERR9808346	not collected	Ghana	West Africa			Clinical (Human)	Human	Clinical	2012
ERR9808347	SAMEA13600398	NA	PDT001347190.1	Ghana	ERR9808347	not collected	Ghana	West Africa			Clinical (Human)	Human	Clinical	2012
ERR9808350	SAMEA13600401	NA	PDT001347191.1	Ghana	ERR9808350	not collected	Ghana	West Africa			Clinical (Human)	Human	Clinical	2012
ERR9808351	SAMEA13600402	NA	PDT001347192.1	Ghana	ERR9808351	not collected	Ghana	West Africa			Clinical (Human)	Human	Clinical	2012
ERR9808354	SAMEA13600405	NA	PDT001347193.1	Ghana	ERR9808354	not collected	Ghana	West Africa			Clinical (Human)	Human	Clinical	2014
ERR9808359	SAMEA13600410	NA	PDT001347194.1	Ghana	ERR9808359	not collected	Ghana	West Africa			Clinical (Human)	Human	Clinical	2014
ERR9808364	SAMEA13600415	NA	PDT001347195.1	Ghana	ERR9808364	not collected	Ghana	West Africa			Clinical (Human)	Human	Clinical	2014
ERR9808366	SAMEA13600417	NA	PDT001347196.1	Ghana	ERR9808366	not collected	Ghana	West Africa			Clinical (Human)	Human	Clinical	2014
ERR9808373	SAMEA13600424	NA	PDT001347197.1	Ghana	ERR9808373	not collected	Ghana	West Africa			Clinical (Human)	Human	Clinical	2014
ERR9808374	SAMEA13600425	NA	PDT001347198.1	Ghana	ERR9808374	not collected	Ghana	West Africa			Clinical (Human)	Human	Clinical	2014
ERR9808382	SAMEA13600433	NA	PDT001347199.1	Ghana	ERR9808382	not collected	Ghana	West Africa			Clinical (Human)	Human	Clinical	2014
ERR9808387	SAMEA13600438	NA	PDT001347200.1	Ghana	ERR9808387	not collected	Ghana	West Africa			Clinical (Human)	Human	Clinical	2014
ERR9808395	SAMEA13600446	NA	PDT001347201.1	Ghana	ERR9808395	not collected	Ghana	West Africa			Clinical (Human)	Human	Clinical	2014
ERR9808397	SAMEA13600448	NA	PDT001347202.1	Ghana	ERR9808397	not collected	Ghana	West Africa			Clinical (Human)	Human	Clinical	2014
ERR9808399	SAMEA13600450	NA	PDT001347203.1	Ghana	ERR9808399	not collected	Ghana	West Africa			Clinical (Human)	Human	Clinical	2014
ERR9808401	SAMEA13600452	NA	PDT001347204.1	Ghana	ERR9808401	not collected	Ghana	West Africa			Clinical (Human)	Human	Clinical	2014
ERR9808402	SAMEA13600453	NA	PDT001347205.1	Ghana	ERR9808402	not collected	Ghana	West Africa			Clinical (Human)	Human	Clinical	2014
ERR9808404	SAMEA13600455	NA	PDT001347206.1	Ghana	ERR9808404	not collected	Ghana	West Africa			Clinical (Human)	Human	Clinical	2014
ERR9808407	SAMEA13600458	NA	PDT001347207.1	Ghana	ERR9808407	not collected	Ghana	West Africa			Clinical (Human)	Human	Clinical	2014
ERR9808330	SAMEA13600381	NA	PDT001347618.1	Ghana	ERR9808330	not collected	Ghana	West Africa			Clinical (Human)	Human	Clinical	2011
ERR9808332	SAMEA13600383	NA	PDT001347619.1	Ghana	ERR9808332	not collected	Ghana	West Africa			Clinical (Human)	Human	Clinical	2011
ERR9808333	SAMEA13600384	NA	PDT001347620.1	Ghana	ERR9808333	not collected	Ghana	West Africa			Clinical (Human)	Human	Clinical	2011
ERR9808334	SAMEA13600385	NA	PDT001347621.1	Ghana	ERR9808334	not collected	Ghana	West Africa			Clinical (Human)	Human	Clinical	2011
ERR9808335	SAMEA13600386	NA	PDT001347622.1	Ghana	ERR9808335	not collected	Ghana	West Africa			Clinical (Human)	Human	Clinical	2011
ERR9808337	SAMEA13600388	NA	PDT001347623.1	Ghana	ERR9808337	not collected	Ghana	West Africa			Clinical (Human)	Human	Clinical	2011
ERR9808339	SAMEA13600390	NA	PDT001347624.1	Ghana	ERR9808339	not collected	Ghana	West Africa			Clinical (Human)	Human	Clinical	2011
ERR9808340	SAMEA13600391	NA	PDT001347625.1	Ghana	ERR9808340	not collected	Ghana	West Africa			Clinical (Human)	Human	Clinical	2011
ERR9808341	SAMEA13600392	NA	PDT001347626.1	Ghana	ERR9808341	not collected	Ghana	West Africa			Clinical (Human)	Human	Clinical	2011
ERR9808343	SAMEA13600394	NA	PDT001347627.1	Ghana	ERR9808343	not collected	Ghana	West Africa			Clinical (Human)	Human	Clinical	2011
ERR9808348	SAMEA13600399	NA	PDT001347628.1	Ghana	ERR9808348	not collected	Ghana	West Africa			Clinical (Human)	Human	Clinical	2012
ERR9808349	SAMEA13600400	NA	PDT001347629.1	Ghana	ERR9808349	not collected	Ghana	West Africa			Clinical (Human)	Human	Clinical	2012
ERR9808352	SAMEA13600403	NA	PDT001347630.1	Ghana	ERR9808352	not collected	Ghana	West Africa			Clinical (Human)	Human	Clinical	2014
ERR9808353	SAMEA13600404	NA	PDT001347631.1	Ghana	ERR9808353	not collected	Ghana	West Africa			Clinical (Human)	Human	Clinical	2014
ERR9808355	SAMEA13600406	NA	PDT001347632.1	Ghana	ERR9808355	not collected	Ghana	West Africa			Clinical (Human)	Human	Clinical	2014
ERR9808356	SAMEA13600407	NA	PDT001347633.1	Ghana	ERR9808356	not collected	Ghana	West Africa			Clinical (Human)	Human	Clinical	2014
ERR9808357	SAMEA13600408	NA	PDT001347634.1	Ghana	ERR9808357	not collected	Ghana	West Africa			Clinical (Human)	Human	Clinical	2014
ERR9808361	SAMEA13600412	NA	PDT001347635.1	Ghana	ERR9808361	not collected	Ghana	West Africa			Clinical (Human)	Human	Clinical	2014
ERR9808363	SAMEA13600414	NA	PDT001347636.1	Ghana	ERR9808363	not collected	Ghana	West Africa			Clinical (Human)	Human	Clinical	2014
ERR9808365	SAMEA13600416	NA	PDT001347637.1	Ghana	ERR9808365	not collected	Ghana	West Africa			Clinical (Human)	Human	Clinical	2014
ERR9808371	SAMEA13600422	NA	PDT001347638.1	Ghana	ERR9808371	not collected	Ghana	West Africa			Clinical (Human)	Human	Clinical	2014
ERR9808372	SAMEA13600423	NA	PDT001347639.1	Ghana	ERR9808372	not collected	Ghana	West Africa			Clinical (Human)	Human	Clinical	2014
ERR9808375	SAMEA13600426	NA	PDT001347640.1	Ghana	ERR9808375	not collected	Ghana	West Africa			Clinical (Human)	Human	Clinical	2014
ERR9808378	SAMEA13600429	NA	PDT001347641.1	Ghana	ERR9808378	not collected	Ghana	West Africa			Clinical (Human)	Human	Clinical	2014
ERR9808379	SAMEA13600430	NA	PDT001347642.1	Ghana	ERR9808379	not collected	Ghana	West Africa			Clinical (Human)	Human	Clinical	2014
ERR9808380	SAMEA13600431	NA	PDT001347643.1	Ghana	ERR9808380	not collected	Ghana	West Africa			Clinical (Human)	Human	Clinical	2014
ERR9808383	SAMEA13600434	NA	PDT001347644.1	Ghana	ERR9808383	not collected	Ghana	West Africa			Clinical (Human)	Human	Clinical	2014
ERR9808385	SAMEA13600436	NA	PDT001347645.1	Ghana	ERR9808385	not collected	Ghana	West Africa			Clinical (Human)	Human	Clinical	2014
ERR9808386	SAMEA13600437	NA	PDT001347646.1	Ghana	ERR9808386	not collected	Ghana	West Africa			Clinical (Human)	Human	Clinical	2014
ERR9808389	SAMEA13600440	NA	PDT001347647.1	Ghana	ERR9808389	not collected	Ghana	West Africa			Clinical (Human)	Human	Clinical	2014
ERR9808390	SAMEA13600441	NA	PDT001347648.1	Ghana	ERR9808390	not collected	Ghana	West Africa			Clinical (Human)	Human	Clinical	2014
ERR9808391	SAMEA13600442	NA	PDT001347649.1	Ghana	ERR9808391	not collected	Ghana	West Africa			Clinical (Human)	Human	Clinical	2014
ERR9808393	SAMEA13600444	NA	PDT001347650.1	Ghana	ERR9808393	not collected	Ghana	West Africa			Clinical (Human)	Human	Clinical	2014
ERR9808394	SAMEA13600445	NA	PDT001347651.1	Ghana	ERR9808394	not collected	Ghana	West Africa			Clinical (Human)	Human	Clinical	2014
ERR9808406	SAMEA13600457	NA	PDT001347652.1	Ghana	ERR9808406	not collected	Ghana	West Africa			Clinical (Human)	Human	Clinical	2014
ERR9808408	SAMEA13600459	NA	PDT001347653.1	Ghana	ERR9808408	not collected	Ghana	West Africa			Clinical (Human)	Human	Clinical	2014
ERR9808409	SAMEA13600460	NA	PDT001347654.1	Ghana	ERR9808409	not collected	Ghana	West Africa			Clinical (Human)	Human	Clinical	2012
ERR9808388	SAMEA13600439	NA	PDT001349163.1	Ghana	ERR9808388	not collected	Ghana	West Africa			Clinical (Human)	Human	Clinical	2014
ERR9808370	SAMEA13600421	NA	PDT001349270.1	Ghana	ERR9808370	not collected	Ghana	West Africa			Clinical (Human)	Human	Clinical	2014
ERR11679330	SAMEA114009703	RC02054099	PDT001905237.1	South Africa	ERR11679330	NA	South Africa	Southern Africa			Clinical (Human)		Clinical	2023
ERR11679334	SAMEA114009707	RC02053404	PDT001905238.1	South Africa	ERR11679334	NA	South Africa	Southern Africa			Clinical (Human)		Clinical	2023
ERR11679340	SAMEA114009713	RC02054264	PDT001905244.1	South Africa	ERR11679340	NA	South Africa	Southern Africa			Clinical (Human)		Clinical	2023
ERR11679342	SAMEA114009715	RC02054350	PDT001905246.1	South Africa	ERR11679342	NA	South Africa	Southern Africa			Clinical (Human)		Clinical	2023
ERR11713375	SAMEA114066549	YA00471862	PDT001905432.1	South Africa	ERR11713375	NA	South Africa	Southern Africa			Environmental (Water)			2023
ERR11713376	SAMEA114066550	YA00469446	PDT001905433.1	South Africa	ERR11713376	NA	South Africa	Southern Africa			Clinical (Human)		Clinical	2023
ERR11679331	SAMEA114009704	RC02054343	PDT001916458.1	South Africa	ERR11679331	NA	South Africa	Southern Africa			Clinical (Human)		Clinical	2023
ERR11679361	SAMEA114009734	RC02053502	PDT001916462.1	South Africa	ERR11679361	NA	South Africa	Southern Africa			Clinical (Human)		Clinical	2023
SRR28466907	SAMN40623179	KEN/2009/136	PDT002123942.1	Kenya: Marsabit	SRR28466907	not collected	Kenya	East Africa		Marsabit	Clinical (Human)	Human	Clinical	2009
SRR24673438	SAMN35220758	NA	PDT002209987.1	Malawi:Salima	SRR24673438	13.7796 S 34.4586 E	Malawi	East Africa		Salima	Clinical (Human)	Human	Clinical	2022
SRR24673440	SAMN35220756	NA	PDT002209989.1	Malawi:Salima	SRR24673440	13.7796 S 34.4586 E	Malawi	East Africa		Salima	Clinical (Human)	Human	Clinical	2022
SRR24673441	SAMN35220795	NA	PDT002209990.1	Malawi:Lilongwe	SRR24673441	13.9626 S 33.7741 E	Malawi	East Africa		Lilongwe	Clinical (Human)	Human	Clinical	2023
SRR24673450	SAMN35220787	NA	PDT002209999.1	Malawi:Lilongwe	SRR24673450	13.9626 S 33.7741 E	Malawi	East Africa		Lilongwe	Clinical (Human)	Human	Clinical	2023
SRR24673454	SAMN35220783	NA	PDT002210003.1	Malawi:Rumphi	SRR24673454	11.0172 S 33.8551 E	Malawi	East Africa		Rumphi	Clinical (Human)	Human	Clinical	2022
SRR24673455	SAMN35220782	NA	PDT002210004.1	Malawi:Rumphi	SRR24673455	11.0172 S 33.8551 E	Malawi	East Africa		Rumphi	Clinical (Human)	Human	Clinical	2022
SRR24673456	SAMN35220781	NA	PDT002210005.1	Malawi:Rumphi	SRR24673456	11.0172 S 33.8551 E	Malawi	East Africa		Rumphi	Clinical (Human)	Human	Clinical	2022
SRR24673464	SAMN35220774	NA	PDT002210013.1	Malawi	SRR24673464	13.2543 S 34.3015 E	Malawi	East Africa			Clinical (Human)	Human	Clinical	2023
SRR24673465	SAMN35220773	NA	PDT002210014.1	Malawi	SRR24673465	13.2543 S 34.3015 E	Malawi	East Africa			Clinical (Human)	Human	Clinical	2023
SRR24673466	SAMN35220772	NA	PDT002210015.1	Malawi:Ntchisi	SRR24673466	13.3820 S 34.0033 E	Malawi	East Africa		Ntchisi	Clinical (Human)	Human	Clinical	2022
SRR24673467	SAMN35220771	NA	PDT002210016.1	Malawi:Machinga	SRR24673467	15.1700 S 35.3000 E	Malawi	East Africa		Machinga	Clinical (Human)	Human	Clinical	2023
SRR24673470	SAMN35220769	NA	PDT002210019.1	Malawi:Lilongwe	SRR24673470	13.9626 S 33.7741 E	Malawi	East Africa		Lilongwe	Clinical (Human)	Human	Clinical	2023
SRR24673471	SAMN35220768	NA	PDT002210020.1	Malawi:Lilongwe	SRR24673471	13.9626 S 33.7741 E	Malawi	East Africa		Lilongwe	Clinical (Human)	Human	Clinical	2023
SRR24673473	SAMN35220766	NA	PDT002210022.1	Malawi:Lilongwe	SRR24673473	13.9626 S 33.7741 E	Malawi	East Africa		Lilongwe	Clinical (Human)	Human	Clinical	2023
SRR24673475	SAMN35220764	NA	PDT002210024.1	Malawi:Lilongwe	SRR24673475	13.9626 S 33.7741 E	Malawi	East Africa		Lilongwe	Clinical (Human)	Human	Clinical	2023
SRR24673476	SAMN35220763	NA	PDT002210025.1	Malawi:Lilongwe	SRR24673476	13.9626 S 33.7741 E	Malawi	East Africa		Lilongwe	Clinical (Human)	Human	Clinical	2023
SRR24673477	SAMN35220762	NA	PDT002210026.1	Malawi:Chikwawa	SRR24673477	16.0438 S 34.8017 E	Malawi	East Africa		Chikwawa	Environmental (Water)	Human	Clinical	2022
ERR13296470	SAMEA115755496	NA	PDT002304306.1	Democratic Republic of the Congo	ERR13296470	NA	Democratic Republic of the Congo	Central Africa						2023
ERR13296484	SAMEA115755497	NA	PDT002304307.1	Democratic Republic of the Congo	ERR13296484	NA	Democratic Republic of the Congo	Central Africa						2023
ERR13296485	SAMEA115755498	NA	PDT002304308.1	Democratic Republic of the Congo	ERR13296485	NA	Democratic Republic of the Congo	Central Africa						2023
ERR13296486	SAMEA115755499	NA	PDT002304309.1	Democratic Republic of the Congo	ERR13296486	NA	Democratic Republic of the Congo	Central Africa						2023
ERR13296487	SAMEA115755500	NA	PDT002304310.1	Democratic Republic of the Congo	ERR13296487	NA	Democratic Republic of the Congo	Central Africa						2023
ERR13297992	SAMEA115755503	NA	PDT002304311.1	Democratic Republic of the Congo	ERR13297992	NA	Democratic Republic of the Congo	Central Africa						2023
ERR13297995	SAMEA115755504	NA	PDT002304312.1	Democratic Republic of the Congo	ERR13297995	NA	Democratic Republic of the Congo	Central Africa						2023
ERR13297997	SAMEA115755505	NA	PDT002304313.1	Democratic Republic of the Congo	ERR13297997	NA	Democratic Republic of the Congo	Central Africa						2023
ERR13297998	SAMEA115755506	NA	PDT002304314.1	Democratic Republic of the Congo	ERR13297998	NA	Democratic Republic of the Congo	Central Africa						2023
ERR13297999	SAMEA115755507	NA	PDT002304315.1	Democratic Republic of the Congo	ERR13297999	NA	Democratic Republic of the Congo	Central Africa						2023
ERR13298001	SAMEA115755508	NA	PDT002304316.1	Democratic Republic of the Congo	ERR13298001	NA	Democratic Republic of the Congo	Central Africa						2023
ERR13298125	SAMEA115755509	NA	PDT002304317.1	Democratic Republic of the Congo	ERR13298125	NA	Democratic Republic of the Congo	Central Africa						2023
ERR13298126	SAMEA115755510	NA	PDT002304318.1	Democratic Republic of the Congo	ERR13298126	NA	Democratic Republic of the Congo	Central Africa						2023
ERR13298127	SAMEA115755511	NA	PDT002304319.1	Democratic Republic of the Congo	ERR13298127	NA	Democratic Republic of the Congo	Central Africa						2023
ERR13298128	SAMEA115755512	NA	PDT002304320.1	Democratic Republic of the Congo	ERR13298128	NA	Democratic Republic of the Congo	Central Africa						2023
ERR13298152	SAMEA115755527	NA	PDT002304321.1	Democratic Republic of the Congo	ERR13298152	NA	Democratic Republic of the Congo	Central Africa						2023
ERR13298155	SAMEA115755529	NA	PDT002304322.1	Democratic Republic of the Congo	ERR13298155	NA	Democratic Republic of the Congo	Central Africa						2023
ERR13298156	SAMEA115755530	NA	PDT002304323.1	Democratic Republic of the Congo	ERR13298156	NA	Democratic Republic of the Congo	Central Africa						2023
ERR13298160	SAMEA115755533	NA	PDT002304324.1	Democratic Republic of the Congo	ERR13298160	NA	Democratic Republic of the Congo	Central Africa						2023
ERR13299674	SAMEA115755541	NA	PDT002304325.1	Democratic Republic of the Congo	ERR13299674	NA	Democratic Republic of the Congo	Central Africa						2023
ERR13299675	SAMEA115755542	NA	PDT002304326.1	Democratic Republic of the Congo	ERR13299675	NA	Democratic Republic of the Congo	Central Africa						2023
ERR13299676	SAMEA115755543	NA	PDT002304327.1	Democratic Republic of the Congo	ERR13299676	NA	Democratic Republic of the Congo	Central Africa						2023
ERR13299677	SAMEA115755544	NA	PDT002304328.1	Democratic Republic of the Congo	ERR13299677	NA	Democratic Republic of the Congo	Central Africa						2023
ERR13299679	SAMEA115755545	NA	PDT002304329.1	Democratic Republic of the Congo	ERR13299679	NA	Democratic Republic of the Congo	Central Africa						2023
ERR13299682	SAMEA115755547	NA	PDT002304330.1	Democratic Republic of the Congo	ERR13299682	NA	Democratic Republic of the Congo	Central Africa						2023
ERR13299683	SAMEA115755548	NA	PDT002304331.1	Democratic Republic of the Congo	ERR13299683	NA	Democratic Republic of the Congo	Central Africa						2023
ERR13299685	SAMEA115755549	NA	PDT002304332.1	Democratic Republic of the Congo	ERR13299685	NA	Democratic Republic of the Congo	Central Africa						2023
ERR13299688	SAMEA115755551	NA	PDT002304333.1	Democratic Republic of the Congo	ERR13299688	NA	Democratic Republic of the Congo	Central Africa						2023
ERR13299697	SAMEA115755552	NA	PDT002304334.1	Democratic Republic of the Congo	ERR13299697	NA	Democratic Republic of the Congo	Central Africa						2023
ERR13299698	SAMEA115755553	NA	PDT002304335.1	Democratic Republic of the Congo	ERR13299698	NA	Democratic Republic of the Congo	Central Africa						2023
ERR13299700	SAMEA115755555	NA	PDT002304336.1	Democratic Republic of the Congo	ERR13299700	NA	Democratic Republic of the Congo	Central Africa						2023
ERR13299701	SAMEA115755556	NA	PDT002304337.1	Democratic Republic of the Congo	ERR13299701	NA	Democratic Republic of the Congo	Central Africa						2024
ERR13299703	SAMEA115755557	NA	PDT002304338.1	Democratic Republic of the Congo	ERR13299703	NA	Democratic Republic of the Congo	Central Africa						2024
ERR13299704	SAMEA115755558	NA	PDT002304339.1	Democratic Republic of the Congo	ERR13299704	NA	Democratic Republic of the Congo	Central Africa						2024
ERR13299705	SAMEA115755559	NA	PDT002304340.1	Democratic Republic of the Congo	ERR13299705	NA	Democratic Republic of the Congo	Central Africa						2024
ERR13299708	SAMEA115755560	NA	PDT002304341.1	Democratic Republic of the Congo	ERR13299708	NA	Democratic Republic of the Congo	Central Africa						2024
ERR13299709	SAMEA115755561	NA	PDT002304342.1	Democratic Republic of the Congo	ERR13299709	NA	Democratic Republic of the Congo	Central Africa						2024
ERR13299710	SAMEA115755562	NA	PDT002304343.1	Democratic Republic of the Congo	ERR13299710	NA	Democratic Republic of the Congo	Central Africa						2024
ERR13299711	SAMEA115755563	NA	PDT002304344.1	Democratic Republic of the Congo	ERR13299711	NA	Democratic Republic of the Congo	Central Africa						2024
ERR13299712	SAMEA115755564	NA	PDT002304345.1	Democratic Republic of the Congo	ERR13299712	NA	Democratic Republic of the Congo	Central Africa						2024
ERR13299713	SAMEA115755565	NA	PDT002304346.1	Democratic Republic of the Congo	ERR13299713	NA	Democratic Republic of the Congo	Central Africa						2024
ERR13299714	SAMEA115755566	NA	PDT002304347.1	Democratic Republic of the Congo	ERR13299714	NA	Democratic Republic of the Congo	Central Africa						2024
ERR13299715	SAMEA115755567	NA	PDT002304348.1	Democratic Republic of the Congo	ERR13299715	NA	Democratic Republic of the Congo	Central Africa						2024
ERR13299716	SAMEA115755568	NA	PDT002304349.1	Democratic Republic of the Congo	ERR13299716	NA	Democratic Republic of the Congo	Central Africa						2024
ERR13299722	SAMEA115755569	NA	PDT002304350.1	Democratic Republic of the Congo	ERR13299722	NA	Democratic Republic of the Congo	Central Africa						2024
ERR13299723	SAMEA115755570	NA	PDT002304351.1	Democratic Republic of the Congo	ERR13299723	NA	Democratic Republic of the Congo	Central Africa						2024
ERR13299724	SAMEA115755571	NA	PDT002304352.1	Democratic Republic of the Congo	ERR13299724	NA	Democratic Republic of the Congo	Central Africa						2024
ERR13299725	SAMEA115755572	NA	PDT002304353.1	Democratic Republic of the Congo	ERR13299725	NA	Democratic Republic of the Congo	Central Africa						2024
ERR13299726	SAMEA115755573	NA	PDT002304354.1	Democratic Republic of the Congo	ERR13299726	NA	Democratic Republic of the Congo	Central Africa						2024
ERR13299727	SAMEA115755574	NA	PDT002304355.1	Democratic Republic of the Congo	ERR13299727	NA	Democratic Republic of the Congo	Central Africa						2024
ERR13299729	SAMEA115755575	NA	PDT002304356.1	Democratic Republic of the Congo	ERR13299729	NA	Democratic Republic of the Congo	Central Africa						2023
ERR13299732	SAMEA115755578	NA	PDT002304357.1	Democratic Republic of the Congo	ERR13299732	NA	Democratic Republic of the Congo	Central Africa						2023
ERR13299733	SAMEA115755579	NA	PDT002304358.1	Democratic Republic of the Congo	ERR13299733	NA	Democratic Republic of the Congo	Central Africa						2023
ERR13299734	SAMEA115755580	NA	PDT002304359.1	Democratic Republic of the Congo	ERR13299734	NA	Democratic Republic of the Congo	Central Africa						2023
ERR13299735	SAMEA115755581	NA	PDT002304360.1	Democratic Republic of the Congo	ERR13299735	NA	Democratic Republic of the Congo	Central Africa						2023
ERR13299738	SAMEA115755582	NA	PDT002304361.1	Democratic Republic of the Congo	ERR13299738	NA	Democratic Republic of the Congo	Central Africa						2023
ERR13299739	SAMEA115755583	NA	PDT002304362.1	Democratic Republic of the Congo	ERR13299739	NA	Democratic Republic of the Congo	Central Africa						2023
ERR13299740	SAMEA115755584	NA	PDT002304363.1	Democratic Republic of the Congo	ERR13299740	NA	Democratic Republic of the Congo	Central Africa						2023
ERR13299741	SAMEA115755585	NA	PDT002304364.1	Democratic Republic of the Congo	ERR13299741	NA	Democratic Republic of the Congo	Central Africa						2023
ERR13299743	SAMEA115755586	NA	PDT002304365.1	Democratic Republic of the Congo	ERR13299743	NA	Democratic Republic of the Congo	Central Africa						2023
ERR13299744	SAMEA115755587	NA	PDT002304366.1	Democratic Republic of the Congo	ERR13299744	NA	Democratic Republic of the Congo	Central Africa						2023
ERR13298130	SAMEA115755513	NA	PDT002304447.1	Democratic Republic of the Congo	ERR13298130	NA	Democratic Republic of the Congo	Central Africa						2023
ERR13298135	SAMEA115755517	NA	PDT002304448.1	Democratic Republic of the Congo	ERR13298135	NA	Democratic Republic of the Congo	Central Africa						2023
ERR13298137	SAMEA115755519	NA	PDT002304449.1	Democratic Republic of the Congo	ERR13298137	NA	Democratic Republic of the Congo	Central Africa						2023
ERR13298142	SAMEA115755521	NA	PDT002304450.1	Democratic Republic of the Congo	ERR13298142	NA	Democratic Republic of the Congo	Central Africa						2023
ERR13298148	SAMEA115755525	NA	PDT002304451.1	Democratic Republic of the Congo	ERR13298148	NA	Democratic Republic of the Congo	Central Africa						2023
ERR13298159	SAMEA115755532	NA	PDT002304452.1	Democratic Republic of the Congo	ERR13298159	NA	Democratic Republic of the Congo	Central Africa						2023
ERR13298162	SAMEA115755535	NA	PDT002304453.1	Democratic Republic of the Congo	ERR13298162	NA	Democratic Republic of the Congo	Central Africa						2023
ERR13299669	SAMEA115755538	NA	PDT002304454.1	Democratic Republic of the Congo	ERR13299669	NA	Democratic Republic of the Congo	Central Africa						2023
ERR13299673	SAMEA115755540	NA	PDT002304455.1	Democratic Republic of the Congo	ERR13299673	NA	Democratic Republic of the Congo	Central Africa						2023
ERR13299680	SAMEA115755546	NA	PDT002304456.1	Democratic Republic of the Congo	ERR13299680	NA	Democratic Republic of the Congo	Central Africa						2023
ERR13299731	SAMEA115755577	NA	PDT002304457.1	Democratic Republic of the Congo	ERR13299731	NA	Democratic Republic of the Congo	Central Africa						2023
ERR13299730	SAMEA115755576	NA	PDT002306338.1	Democratic Republic of the Congo	ERR13299730	NA	Democratic Republic of the Congo	Central Africa						2023
ERR13298140	SAMEA115755520	NA	PDT002306355.1	Democratic Republic of the Congo	ERR13298140	NA	Democratic Republic of the Congo	Central Africa						2023
ERR13299295	SAMEA115755536	NA	PDT002306356.1	Democratic Republic of the Congo	ERR13299295	NA	Democratic Republic of the Congo	Central Africa						2023
ERR13299686	SAMEA115755550	NA	PDT002306357.1	Democratic Republic of the Congo	ERR13299686	NA	Democratic Republic of the Congo	Central Africa						2023
ERR13298131	SAMEA115755514	NA	PDT002309217.1	Democratic Republic of the Congo	ERR13298131	NA	Democratic Republic of the Congo	Central Africa						2023
ERR13298147	SAMEA115755524	NA	PDT002309218.1	Democratic Republic of the Congo	ERR13298147	NA	Democratic Republic of the Congo	Central Africa						2023
ERR13298149	SAMEA115755526	NA	PDT002309219.1	Democratic Republic of the Congo	ERR13298149	NA	Democratic Republic of the Congo	Central Africa						2023
ERR13298153	SAMEA115755528	NA	PDT002309220.1	Democratic Republic of the Congo	ERR13298153	NA	Democratic Republic of the Congo	Central Africa						2023
ERR13299665	SAMEA115755537	NA	PDT002309221.1	Democratic Republic of the Congo	ERR13299665	NA	Democratic Republic of the Congo	Central Africa						2023
ERR13298136	SAMEA115755518	NA	PDT002310918.1	Democratic Republic of the Congo	ERR13298136	NA	Democratic Republic of the Congo	Central Africa						2023
ERR13298134	SAMEA115755516	NA	PDT002314499.1	Democratic Republic of the Congo	ERR13298134	NA	Democratic Republic of the Congo	Central Africa						2023
ERR13298144	SAMEA115755522	NA	PDT002314500.1	Democratic Republic of the Congo	ERR13298144	NA	Democratic Republic of the Congo	Central Africa						2023
ERR13298145	SAMEA115755523	NA	PDT002314501.1	Democratic Republic of the Congo	ERR13298145	NA	Democratic Republic of the Congo	Central Africa						2023
ERR13298157	SAMEA115755531	NA	PDT002314502.1	Democratic Republic of the Congo	ERR13298157	NA	Democratic Republic of the Congo	Central Africa						2023
ERR13299699	SAMEA115755554	NA	PDT002314503.1	Democratic Republic of the Congo	ERR13299699	NA	Democratic Republic of the Congo	Central Africa						2023
ERR13296489	SAMEA115755501	NA	PDT002315742.1	Democratic Republic of the Congo	ERR13296489	NA	Democratic Republic of the Congo	Central Africa						2023
ERR13298161	SAMEA115755534	NA	PDT002326988.1	Democratic Republic of the Congo	ERR13298161	NA	Democratic Republic of the Congo	Central Africa						2023
ERR13299672	SAMEA115755539	NA	PDT002327049.1	Democratic Republic of the Congo	ERR13299672	NA	Democratic Republic of the Congo	Central Africa						2023
ERR13298132	SAMEA115755515	NA	PDT002329715.1	Democratic Republic of the Congo	ERR13298132	NA	Democratic Republic of the Congo	Central Africa						2023
ERR13297991	SAMEA115755502	NA	PDT002337997.1	Democratic Republic of the Congo	ERR13297991	NA	Democratic Republic of the Congo	Central Africa						2023
SRR30613512	SAMN43554724	NA	PDT002564917.1	Uganda: Bududa	SRR30613512	not collected	Uganda	East Africa		Bududa	Clinical (Human)	Human	Clinical	2019
SRR30613513	SAMN43554723	NA	PDT002564918.1	Uganda: Kyegegwa	SRR30613513	not collected	Uganda	East Africa		Kyegegwa	Clinical (Human)	Human	Clinical	2019
SRR30613514	SAMN43554722	NA	PDT002564919.1	Uganda: Mbale	SRR30613514	not collected	Uganda	East Africa		Mbale	Clinical (Human)	Human	Clinical	2019
SRR30613522	SAMN43554721	NA	PDT002564927.1	Uganda: Mbale	SRR30613522	not collected	Uganda	East Africa		Mbale	Clinical (Human)	Human	Clinical	2019
SRR31063591	SAMN44369201	NA	PDT002565194.1	Zambia: Eastern	SRR31063591	not collected	Zambia	East Africa		Eastern	Clinical (Human)	Human	Clinical	2024
SRR31063622	SAMN44369275	NA	PDT002565225.1	Zambia: Eastern	SRR31063622	not collected	Zambia	East Africa		Eastern	Clinical (Human)	Human	Clinical	2023
SRR31063720	SAMN44369316	NA	PDT002565323.1	Zambia: Central	SRR31063720	not collected	Zambia	East Africa		Central	Clinical (Human)	Human	Clinical	2024
ERR14364278	SAMEA117685619	NA	PDT002663811.1	Cameroon	ERR14364278	NA	Cameroon	Central Africa						2018
ERR14364279	SAMEA117685620	NA	PDT002663812.1	Cameroon	ERR14364279	NA	Cameroon	Central Africa						2018
ERR14364280	SAMEA117685621	NA	PDT002663813.1	Cameroon	ERR14364280	NA	Cameroon	Central Africa						2018
ERR14364281	SAMEA117685622	NA	PDT002663814.1	Cameroon	ERR14364281	NA	Cameroon	Central Africa						2018
ERR14364282	SAMEA117685623	NA	PDT002663815.1	Cameroon	ERR14364282	NA	Cameroon	Central Africa						2018
ERR14364283	SAMEA117685624	NA	PDT002663816.1	Cameroon	ERR14364283	NA	Cameroon	Central Africa						2018
ERR14364284	SAMEA117685625	NA	PDT002663817.1	Cameroon	ERR14364284	NA	Cameroon	Central Africa						2018
ERR14364285	SAMEA117685626	NA	PDT002663818.1	Cameroon	ERR14364285	NA	Cameroon	Central Africa						2018
ERR14364286	SAMEA117685627	NA	PDT002663819.1	Cameroon	ERR14364286	NA	Cameroon	Central Africa						2018
ERR14364287	SAMEA117685628	NA	PDT002663820.1	Cameroon	ERR14364287	NA	Cameroon	Central Africa						2018
ERR14364288	SAMEA117685629	NA	PDT002663821.1	Cameroon	ERR14364288	NA	Cameroon	Central Africa						2018
ERR14364289	SAMEA117685630	NA	PDT002663822.1	Cameroon	ERR14364289	NA	Cameroon	Central Africa						2018
ERR14364290	SAMEA117685631	NA	PDT002663823.1	Cameroon	ERR14364290	NA	Cameroon	Central Africa						2018
ERR14364291	SAMEA117685632	NA	PDT002663824.1	Cameroon	ERR14364291	NA	Cameroon	Central Africa						2018
ERR14364292	SAMEA117685633	NA	PDT002663825.1	Cameroon	ERR14364292	NA	Cameroon	Central Africa						2018
ERR14364293	SAMEA117685634	NA	PDT002663826.1	Cameroon	ERR14364293	NA	Cameroon	Central Africa						2018
ERR14364294	SAMEA117685635	NA	PDT002663827.1	Cameroon	ERR14364294	NA	Cameroon	Central Africa						2018
ERR14364295	SAMEA117685636	NA	PDT002663828.1	Cameroon	ERR14364295	NA	Cameroon	Central Africa						2018
ERR14364296	SAMEA117685637	NA	PDT002663829.1	Cameroon	ERR14364296	NA	Cameroon	Central Africa						2018
ERR14364297	SAMEA117685638	NA	PDT002663830.1	Cameroon	ERR14364297	NA	Cameroon	Central Africa						2018
ERR14364298	SAMEA117685639	NA	PDT002663831.1	Cameroon	ERR14364298	NA	Cameroon	Central Africa						2018
ERR14364299	SAMEA117685640	NA	PDT002663832.1	Cameroon	ERR14364299	NA	Cameroon	Central Africa						2018
ERR14364300	SAMEA117685641	NA	PDT002663833.1	Cameroon	ERR14364300	NA	Cameroon	Central Africa						2018
ERR14364301	SAMEA117685642	NA	PDT002663834.1	Cameroon	ERR14364301	NA	Cameroon	Central Africa						2018
ERR14364302	SAMEA117685643	NA	PDT002663835.1	Cameroon	ERR14364302	NA	Cameroon	Central Africa						2018
ERR14364303	SAMEA117685644	NA	PDT002663836.1	Cameroon	ERR14364303	NA	Cameroon	Central Africa						2018
ERR14364304	SAMEA117685645	NA	PDT002663837.1	Cameroon	ERR14364304	NA	Cameroon	Central Africa						2018
ERR14364305	SAMEA117685646	NA	PDT002663838.1	Cameroon	ERR14364305	NA	Cameroon	Central Africa						2018
ERR14364306	SAMEA117685647	NA	PDT002663839.1	Cameroon	ERR14364306	NA	Cameroon	Central Africa						2018
ERR14364307	SAMEA117685648	NA	PDT002663840.1	Cameroon	ERR14364307	NA	Cameroon	Central Africa						2018
ERR14364308	SAMEA117685649	NA	PDT002663841.1	Cameroon	ERR14364308	NA	Cameroon	Central Africa						2018
ERR14364309	SAMEA117685650	NA	PDT002663842.1	Cameroon	ERR14364309	NA	Cameroon	Central Africa						2018
ERR14364310	SAMEA117685651	NA	PDT002663843.1	Cameroon	ERR14364310	NA	Cameroon	Central Africa						2018
ERR14364311	SAMEA117685652	NA	PDT002663844.1	Cameroon	ERR14364311	NA	Cameroon	Central Africa						2018
ERR14364312	SAMEA117685653	NA	PDT002663845.1	Cameroon	ERR14364312	NA	Cameroon	Central Africa						2019
ERR14364313	SAMEA117685654	NA	PDT002663846.1	Cameroon	ERR14364313	NA	Cameroon	Central Africa						2019
ERR14364314	SAMEA117685655	NA	PDT002663847.1	Cameroon	ERR14364314	NA	Cameroon	Central Africa						2019
ERR14364315	SAMEA117685656	NA	PDT002663848.1	Cameroon	ERR14364315	NA	Cameroon	Central Africa						2019
ERR14364316	SAMEA117685657	NA	PDT002663849.1	Cameroon	ERR14364316	NA	Cameroon	Central Africa						2019
ERR14364317	SAMEA117685658	NA	PDT002663850.1	Cameroon	ERR14364317	NA	Cameroon	Central Africa						2019
ERR14364318	SAMEA117685659	NA	PDT002663851.1	Cameroon	ERR14364318	NA	Cameroon	Central Africa						2019
ERR14364319	SAMEA117685660	NA	PDT002663852.1	Cameroon	ERR14364319	NA	Cameroon	Central Africa						2019
ERR14364320	SAMEA117685661	NA	PDT002663853.1	Cameroon	ERR14364320	NA	Cameroon	Central Africa						2019
ERR14364321	SAMEA117685662	NA	PDT002663854.1	Cameroon	ERR14364321	NA	Cameroon	Central Africa						2019
ERR14364322	SAMEA117685663	NA	PDT002663855.1	Cameroon	ERR14364322	NA	Cameroon	Central Africa						2019
ERR14364323	SAMEA117685664	NA	PDT002663856.1	Cameroon	ERR14364323	NA	Cameroon	Central Africa						2019
ERR14364324	SAMEA117685665	NA	PDT002663857.1	Cameroon	ERR14364324	NA	Cameroon	Central Africa						2019
ERR14364325	SAMEA117685666	NA	PDT002663858.1	Cameroon	ERR14364325	NA	Cameroon	Central Africa						2018
ERR14364326	SAMEA117685667	NA	PDT002663859.1	Cameroon	ERR14364326	NA	Cameroon	Central Africa						2019
ERR14364327	SAMEA117685668	NA	PDT002663860.1	Cameroon	ERR14364327	NA	Cameroon	Central Africa						2019
ERR14364328	SAMEA117685669	NA	PDT002663861.1	Cameroon	ERR14364328	NA	Cameroon	Central Africa						2019
ERR14364329	SAMEA117685670	NA	PDT002663862.1	Cameroon	ERR14364329	NA	Cameroon	Central Africa						2019
ERR14364330	SAMEA117685671	NA	PDT002663863.1	Cameroon	ERR14364330	NA	Cameroon	Central Africa						2019
ERR14364331	SAMEA117685672	NA	PDT002663864.1	Cameroon	ERR14364331	NA	Cameroon	Central Africa						2019
ERR14364332	SAMEA117685673	NA	PDT002663865.1	Cameroon	ERR14364332	NA	Cameroon	Central Africa						2019
ERR14364333	SAMEA117685674	NA	PDT002663866.1	Cameroon	ERR14364333	NA	Cameroon	Central Africa						2019
ERR14364334	SAMEA117685675	NA	PDT002663867.1	Cameroon	ERR14364334	NA	Cameroon	Central Africa						2019
ERR14364335	SAMEA117685501	NA	PDT002663868.1	Cameroon	ERR14364335	NA	Cameroon	Central Africa						2023
ERR14364336	SAMEA117685502	NA	PDT002663869.1	Cameroon	ERR14364336	NA	Cameroon	Central Africa						2023
ERR14364337	SAMEA117685503	NA	PDT002663870.1	Cameroon	ERR14364337	NA	Cameroon	Central Africa						2023
ERR14364338	SAMEA117685504	NA	PDT002663871.1	Cameroon	ERR14364338	NA	Cameroon	Central Africa						2023
ERR14364339	SAMEA117685505	NA	PDT002663872.1	Cameroon	ERR14364339	NA	Cameroon	Central Africa						2023
ERR14364340	SAMEA117685506	NA	PDT002663873.1	Cameroon	ERR14364340	NA	Cameroon	Central Africa						2023
ERR14364341	SAMEA117685507	NA	PDT002663874.1	Cameroon	ERR14364341	NA	Cameroon	Central Africa						2023
ERR14364342	SAMEA117685508	NA	PDT002663875.1	Cameroon	ERR14364342	NA	Cameroon	Central Africa						2023
ERR14364343	SAMEA117685509	NA	PDT002663876.1	Cameroon	ERR14364343	NA	Cameroon	Central Africa						2023
ERR14364344	SAMEA117685510	NA	PDT002663877.1	Cameroon	ERR14364344	NA	Cameroon	Central Africa						2019
ERR14364345	SAMEA117685511	NA	PDT002663878.1	Cameroon	ERR14364345	NA	Cameroon	Central Africa						2019
ERR14364346	SAMEA117685512	NA	PDT002663879.1	Cameroon	ERR14364346	NA	Cameroon	Central Africa						2019
ERR14364347	SAMEA117685513	NA	PDT002663880.1	Cameroon	ERR14364347	NA	Cameroon	Central Africa						2019
ERR14364348	SAMEA117685514	NA	PDT002663881.1	Cameroon	ERR14364348	NA	Cameroon	Central Africa						2019
ERR14364349	SAMEA117685515	NA	PDT002663882.1	Cameroon	ERR14364349	NA	Cameroon	Central Africa						2019
ERR14364350	SAMEA117685516	NA	PDT002663883.1	Cameroon	ERR14364350	NA	Cameroon	Central Africa						2020
ERR14364351	SAMEA117685517	NA	PDT002663884.1	Cameroon	ERR14364351	NA	Cameroon	Central Africa						2020
ERR14364352	SAMEA117685518	NA	PDT002663885.1	Cameroon	ERR14364352	NA	Cameroon	Central Africa						2020
ERR14364353	SAMEA117685519	NA	PDT002663886.1	Cameroon	ERR14364353	NA	Cameroon	Central Africa						2020
ERR14364354	SAMEA117685520	NA	PDT002663887.1	Cameroon	ERR14364354	NA	Cameroon	Central Africa						2020
ERR14364355	SAMEA117685521	NA	PDT002663888.1	Cameroon	ERR14364355	NA	Cameroon	Central Africa						2020
ERR14364356	SAMEA117685522	NA	PDT002663889.1	Cameroon	ERR14364356	NA	Cameroon	Central Africa						2020
ERR14364357	SAMEA117685523	NA	PDT002663890.1	Cameroon	ERR14364357	NA	Cameroon	Central Africa						2020
ERR14364358	SAMEA117685524	NA	PDT002663891.1	Cameroon	ERR14364358	NA	Cameroon	Central Africa						2020
ERR14364359	SAMEA117685525	NA	PDT002663892.1	Cameroon	ERR14364359	NA	Cameroon	Central Africa						2020
ERR14364360	SAMEA117685526	NA	PDT002663893.1	Cameroon	ERR14364360	NA	Cameroon	Central Africa						2020
ERR14364361	SAMEA117685527	NA	PDT002663894.1	Cameroon	ERR14364361	NA	Cameroon	Central Africa						2020
ERR14364362	SAMEA117685528	NA	PDT002663895.1	Cameroon	ERR14364362	NA	Cameroon	Central Africa						2020
ERR14364363	SAMEA117685529	NA	PDT002663896.1	Cameroon	ERR14364363	NA	Cameroon	Central Africa						2020
ERR14364364	SAMEA117685530	NA	PDT002663897.1	Cameroon	ERR14364364	NA	Cameroon	Central Africa						2020
ERR14364365	SAMEA117685531	NA	PDT002663898.1	Cameroon	ERR14364365	NA	Cameroon	Central Africa						2020
ERR14364366	SAMEA117685532	NA	PDT002663899.1	Cameroon	ERR14364366	NA	Cameroon	Central Africa						2020
ERR14364367	SAMEA117685533	NA	PDT002663900.1	Cameroon	ERR14364367	NA	Cameroon	Central Africa						2020
ERR14364368	SAMEA117685534	NA	PDT002663901.1	Cameroon	ERR14364368	NA	Cameroon	Central Africa						2020
ERR14364369	SAMEA117685535	NA	PDT002663902.1	Cameroon	ERR14364369	NA	Cameroon	Central Africa						2020
ERR14364370	SAMEA117685536	NA	PDT002663903.1	Cameroon	ERR14364370	NA	Cameroon	Central Africa						2020
ERR14364371	SAMEA117685537	NA	PDT002663904.1	Cameroon	ERR14364371	NA	Cameroon	Central Africa						2020
ERR14364372	SAMEA117685538	NA	PDT002663905.1	Cameroon	ERR14364372	NA	Cameroon	Central Africa						2020
ERR14364373	SAMEA117685539	NA	PDT002663906.1	Cameroon	ERR14364373	NA	Cameroon	Central Africa						2020
ERR14364374	SAMEA117685540	NA	PDT002663907.1	Cameroon	ERR14364374	NA	Cameroon	Central Africa						2020
ERR14364375	SAMEA117685541	NA	PDT002663908.1	Cameroon	ERR14364375	NA	Cameroon	Central Africa						2020
ERR14364376	SAMEA117685542	NA	PDT002663909.1	Cameroon	ERR14364376	NA	Cameroon	Central Africa						2020
ERR14364377	SAMEA117685543	NA	PDT002663910.1	Cameroon	ERR14364377	NA	Cameroon	Central Africa						2020
ERR14364378	SAMEA117685544	NA	PDT002663911.1	Cameroon	ERR14364378	NA	Cameroon	Central Africa						2020
ERR14364379	SAMEA117685545	NA	PDT002663912.1	Cameroon	ERR14364379	NA	Cameroon	Central Africa						2020
ERR14364380	SAMEA117685546	NA	PDT002663913.1	Cameroon	ERR14364380	NA	Cameroon	Central Africa						2020
ERR14364381	SAMEA117685547	NA	PDT002663914.1	Cameroon	ERR14364381	NA	Cameroon	Central Africa						2020
ERR14364382	SAMEA117685548	NA	PDT002663915.1	Cameroon	ERR14364382	NA	Cameroon	Central Africa						2020
ERR14364383	SAMEA117685549	NA	PDT002663916.1	Cameroon	ERR14364383	NA	Cameroon	Central Africa						2020
ERR14364384	SAMEA117685550	NA	PDT002663917.1	Cameroon	ERR14364384	NA	Cameroon	Central Africa						2020
ERR14364385	SAMEA117685551	NA	PDT002663918.1	Cameroon	ERR14364385	NA	Cameroon	Central Africa						2020
ERR14364386	SAMEA117685552	NA	PDT002663919.1	Cameroon	ERR14364386	NA	Cameroon	Central Africa						2020
ERR14364387	SAMEA117685553	NA	PDT002663920.1	Cameroon	ERR14364387	NA	Cameroon	Central Africa						2020
ERR14364388	SAMEA117685554	NA	PDT002663921.1	Cameroon	ERR14364388	NA	Cameroon	Central Africa						2021
ERR14364389	SAMEA117685555	NA	PDT002663922.1	Cameroon	ERR14364389	NA	Cameroon	Central Africa						2021
ERR14364390	SAMEA117685556	NA	PDT002663923.1	Cameroon	ERR14364390	NA	Cameroon	Central Africa						2021
ERR14364391	SAMEA117685557	NA	PDT002663924.1	Cameroon	ERR14364391	NA	Cameroon	Central Africa						2021
ERR14364392	SAMEA117685558	NA	PDT002663925.1	Cameroon	ERR14364392	NA	Cameroon	Central Africa						2022
ERR14364393	SAMEA117685559	NA	PDT002663926.1	Cameroon	ERR14364393	NA	Cameroon	Central Africa						2022
ERR14364394	SAMEA117685560	NA	PDT002663927.1	Cameroon	ERR14364394	NA	Cameroon	Central Africa						2022
ERR14364395	SAMEA117685561	NA	PDT002663928.1	Cameroon	ERR14364395	NA	Cameroon	Central Africa						2022
ERR14364396	SAMEA117685562	NA	PDT002663929.1	Cameroon	ERR14364396	NA	Cameroon	Central Africa						2022
ERR14364397	SAMEA117685563	NA	PDT002663930.1	Cameroon	ERR14364397	NA	Cameroon	Central Africa						2022
ERR14364398	SAMEA117685564	NA	PDT002663931.1	Cameroon	ERR14364398	NA	Cameroon	Central Africa						2022
ERR14364399	SAMEA117685565	NA	PDT002663932.1	Cameroon	ERR14364399	NA	Cameroon	Central Africa						2022
ERR14364400	SAMEA117685566	NA	PDT002663933.1	Cameroon	ERR14364400	NA	Cameroon	Central Africa						2022
ERR14364401	SAMEA117685567	NA	PDT002663934.1	Cameroon	ERR14364401	NA	Cameroon	Central Africa						2022
ERR14364402	SAMEA117685568	NA	PDT002663935.1	Cameroon	ERR14364402	NA	Cameroon	Central Africa						2022
ERR14364403	SAMEA117685569	NA	PDT002663936.1	Cameroon	ERR14364403	NA	Cameroon	Central Africa						2022
ERR14364404	SAMEA117685570	NA	PDT002663937.1	Cameroon	ERR14364404	NA	Cameroon	Central Africa						2022
ERR14364405	SAMEA117685571	NA	PDT002663938.1	Cameroon	ERR14364405	NA	Cameroon	Central Africa						2023
ERR14364406	SAMEA117685572	NA	PDT002663939.1	Cameroon	ERR14364406	NA	Cameroon	Central Africa						2023
ERR14364407	SAMEA117685573	NA	PDT002663940.1	Cameroon	ERR14364407	NA	Cameroon	Central Africa						2023
ERR14364408	SAMEA117685574	NA	PDT002663941.1	Cameroon	ERR14364408	NA	Cameroon	Central Africa						2022
ERR14364409	SAMEA117685575	NA	PDT002663942.1	Cameroon	ERR14364409	NA	Cameroon	Central Africa						2020
ERR14364410	SAMEA117685576	NA	PDT002663943.1	Cameroon	ERR14364410	NA	Cameroon	Central Africa						2022
ERR14364411	SAMEA117685577	NA	PDT002663944.1	Cameroon	ERR14364411	NA	Cameroon	Central Africa						2022
ERR14364412	SAMEA117685578	NA	PDT002663945.1	Cameroon	ERR14364412	NA	Cameroon	Central Africa						2022
ERR14364413	SAMEA117685579	NA	PDT002663946.1	Cameroon	ERR14364413	NA	Cameroon	Central Africa						2022
ERR14364414	SAMEA117685580	NA	PDT002663947.1	Cameroon	ERR14364414	NA	Cameroon	Central Africa						2022
ERR14364415	SAMEA117685581	NA	PDT002663948.1	Cameroon	ERR14364415	NA	Cameroon	Central Africa						2022
ERR14364416	SAMEA117685582	NA	PDT002663949.1	Cameroon	ERR14364416	NA	Cameroon	Central Africa						2022
ERR14364417	SAMEA117685583	NA	PDT002663950.1	Cameroon	ERR14364417	NA	Cameroon	Central Africa						2022
ERR14364418	SAMEA117685584	NA	PDT002663951.1	Cameroon	ERR14364418	NA	Cameroon	Central Africa						2022
ERR14364419	SAMEA117685585	NA	PDT002663952.1	Cameroon	ERR14364419	NA	Cameroon	Central Africa						2023
ERR14364420	SAMEA117685586	NA	PDT002663953.1	Cameroon	ERR14364420	NA	Cameroon	Central Africa						2022
ERR14364421	SAMEA117685587	NA	PDT002663954.1	Cameroon	ERR14364421	NA	Cameroon	Central Africa						2022
ERR14364422	SAMEA117685588	NA	PDT002663955.1	Cameroon	ERR14364422	NA	Cameroon	Central Africa						2022
ERR14364423	SAMEA117685589	NA	PDT002663956.1	Cameroon	ERR14364423	NA	Cameroon	Central Africa						2022
ERR14364424	SAMEA117685590	NA	PDT002663957.1	Cameroon	ERR14364424	NA	Cameroon	Central Africa						2022
ERR14364425	SAMEA117685591	NA	PDT002663958.1	Cameroon	ERR14364425	NA	Cameroon	Central Africa						2022
ERR14364426	SAMEA117685592	NA	PDT002663959.1	Cameroon	ERR14364426	NA	Cameroon	Central Africa						2022
ERR14364427	SAMEA117685593	NA	PDT002663960.1	Cameroon	ERR14364427	NA	Cameroon	Central Africa						2022
ERR14364428	SAMEA117685594	NA	PDT002663961.1	Cameroon	ERR14364428	NA	Cameroon	Central Africa						2022
ERR14364429	SAMEA117685595	NA	PDT002663962.1	Cameroon	ERR14364429	NA	Cameroon	Central Africa						2022
ERR14364430	SAMEA117685596	NA	PDT002663963.1	Cameroon	ERR14364430	NA	Cameroon	Central Africa						2022
ERR14364431	SAMEA117685597	NA	PDT002663964.1	Cameroon	ERR14364431	NA	Cameroon	Central Africa						2023
ERR14364432	SAMEA117685598	NA	PDT002663965.1	Cameroon	ERR14364432	NA	Cameroon	Central Africa						2023
ERR14364433	SAMEA117685599	NA	PDT002663966.1	Cameroon	ERR14364433	NA	Cameroon	Central Africa						2023
ERR14364434	SAMEA117685600	NA	PDT002663967.1	Cameroon	ERR14364434	NA	Cameroon	Central Africa						2023
ERR14364435	SAMEA117685601	NA	PDT002663968.1	Cameroon	ERR14364435	NA	Cameroon	Central Africa						2022
ERR14364436	SAMEA117685602	NA	PDT002663969.1	Cameroon	ERR14364436	NA	Cameroon	Central Africa						2022
ERR14364437	SAMEA117685603	NA	PDT002663970.1	Cameroon	ERR14364437	NA	Cameroon	Central Africa						2022
ERR14364438	SAMEA117685604	NA	PDT002663971.1	Cameroon	ERR14364438	NA	Cameroon	Central Africa						2022
ERR14364439	SAMEA117685605	NA	PDT002663972.1	Cameroon	ERR14364439	NA	Cameroon	Central Africa						2022
ERR14364440	SAMEA117685606	NA	PDT002663973.1	Cameroon	ERR14364440	NA	Cameroon	Central Africa						2020
ERR14364441	SAMEA117685607	NA	PDT002663974.1	Cameroon	ERR14364441	NA	Cameroon	Central Africa						2020
ERR14364442	SAMEA117685695	NA	PDT002663975.1	Niger	ERR14364442	NA	Niger	West Africa						2018
ERR14364443	SAMEA117685696	NA	PDT002663976.1	Niger	ERR14364443	NA	Niger	West Africa						2018
ERR14364444	SAMEA117685697	NA	PDT002663977.1	Niger	ERR14364444	NA	Niger	West Africa						2018
ERR14364445	SAMEA117685698	NA	PDT002663978.1	Niger	ERR14364445	NA	Niger	West Africa						2018
ERR14364446	SAMEA117685699	NA	PDT002663979.1	Niger	ERR14364446	NA	Niger	West Africa						2018
ERR14364447	SAMEA117685700	NA	PDT002663980.1	Niger	ERR14364447	NA	Niger	West Africa						2018
ERR14364448	SAMEA117685701	NA	PDT002663981.1	Niger	ERR14364448	NA	Niger	West Africa						2018
ERR14364449	SAMEA117685702	NA	PDT002663982.1	Niger	ERR14364449	NA	Niger	West Africa						2018
ERR14364450	SAMEA117685703	NA	PDT002663983.1	Niger	ERR14364450	NA	Niger	West Africa						2018
ERR14364451	SAMEA117685704	NA	PDT002663984.1	Niger	ERR14364451	NA	Niger	West Africa						2018
ERR14364452	SAMEA117685705	NA	PDT002663985.1	Niger	ERR14364452	NA	Niger	West Africa						2018
ERR14364453	SAMEA117685706	NA	PDT002663986.1	Niger	ERR14364453	NA	Niger	West Africa						2018
ERR14364454	SAMEA117685707	NA	PDT002663987.1	Niger	ERR14364454	NA	Niger	West Africa						2018
ERR14364455	SAMEA117685708	NA	PDT002663988.1	Niger	ERR14364455	NA	Niger	West Africa						2018
ERR14364456	SAMEA117685709	NA	PDT002663989.1	Niger	ERR14364456	NA	Niger	West Africa						2018
ERR14364457	SAMEA117685712	NA	PDT002663990.1	Niger	ERR14364457	NA	Niger	West Africa						2018
ERR14364458	SAMEA117685713	NA	PDT002663991.1	Niger	ERR14364458	NA	Niger	West Africa						2018
ERR14364459	SAMEA117685714	NA	PDT002663992.1	Niger	ERR14364459	NA	Niger	West Africa						2018
ERR14364460	SAMEA117685715	NA	PDT002663993.1	Niger	ERR14364460	NA	Niger	West Africa						2018
ERR14364461	SAMEA117685716	NA	PDT002663994.1	Niger	ERR14364461	NA	Niger	West Africa						2018
ERR14364462	SAMEA117685717	NA	PDT002663995.1	Niger	ERR14364462	NA	Niger	West Africa						2018
ERR14364463	SAMEA117685718	NA	PDT002663996.1	Niger	ERR14364463	NA	Niger	West Africa						2018
ERR14364464	SAMEA117685719	NA	PDT002663997.1	Niger	ERR14364464	NA	Niger	West Africa						2018
ERR14364465	SAMEA117685720	NA	PDT002663998.1	Niger	ERR14364465	NA	Niger	West Africa						2018
ERR14364466	SAMEA117685721	NA	PDT002663999.1	Niger	ERR14364466	NA	Niger	West Africa						2018
ERR14364467	SAMEA117685722	NA	PDT002664000.1	Niger	ERR14364467	NA	Niger	West Africa						2018
ERR14364468	SAMEA117685723	NA	PDT002664001.1	Niger	ERR14364468	NA	Niger	West Africa						2018
ERR14364469	SAMEA117685724	NA	PDT002664002.1	Niger	ERR14364469	NA	Niger	West Africa						2018
ERR14364470	SAMEA117685725	NA	PDT002664003.1	Niger	ERR14364470	NA	Niger	West Africa						2018
ERR14364471	SAMEA117685726	NA	PDT002664004.1	Niger	ERR14364471	NA	Niger	West Africa						2018
ERR14364472	SAMEA117685727	NA	PDT002664005.1	Niger	ERR14364472	NA	Niger	West Africa						2018
ERR14364473	SAMEA117685728	NA	PDT002664006.1	Niger	ERR14364473	NA	Niger	West Africa						2018
ERR14364474	SAMEA117685729	NA	PDT002664007.1	Niger	ERR14364474	NA	Niger	West Africa						2018
ERR14364475	SAMEA117685730	NA	PDT002664008.1	Niger	ERR14364475	NA	Niger	West Africa						2018
ERR14364476	SAMEA117685676	NA	PDT002664009.1	Benin	ERR14364476	NA	Benin	West Africa						2019
ERR14364477	SAMEA117685677	NA	PDT002664010.1	Benin	ERR14364477	NA	Benin	West Africa						2019
ERR14364478	SAMEA117685678	NA	PDT002664011.1	Benin	ERR14364478	NA	Benin	West Africa						2019
ERR14364479	SAMEA117685679	NA	PDT002664012.1	Benin	ERR14364479	NA	Benin	West Africa						2019
ERR14364480	SAMEA117685680	NA	PDT002664013.1	Benin	ERR14364480	NA	Benin	West Africa						2019
ERR14364481	SAMEA117685681	NA	PDT002664014.1	Benin	ERR14364481	NA	Benin	West Africa						2019
ERR14364482	SAMEA117685682	NA	PDT002664015.1	Benin	ERR14364482	NA	Benin	West Africa						2019
ERR14364483	SAMEA117685683	NA	PDT002664016.1	Benin	ERR14364483	NA	Benin	West Africa						2019
ERR14364484	SAMEA117685684	NA	PDT002664017.1	Benin	ERR14364484	NA	Benin	West Africa						2019
ERR14364485	SAMEA117685685	NA	PDT002664018.1	Benin	ERR14364485	NA	Benin	West Africa						2019
ERR14364486	SAMEA117685686	NA	PDT002664019.1	Benin	ERR14364486	NA	Benin	West Africa						2019
ERR14364487	SAMEA117685687	NA	PDT002664020.1	Benin	ERR14364487	NA	Benin	West Africa						2019
ERR14364488	SAMEA117685688	NA	PDT002664021.1	Benin	ERR14364488	NA	Benin	West Africa						2019
ERR14364489	SAMEA117685689	NA	PDT002664022.1	Benin	ERR14364489	NA	Benin	West Africa						2019
ERR14364490	SAMEA117685690	NA	PDT002664023.1	Benin	ERR14364490	NA	Benin	West Africa						2019
ERR14364491	SAMEA117685691	NA	PDT002664024.1	Benin	ERR14364491	NA	Benin	West Africa						2019
ERR14364492	SAMEA117685692	NA	PDT002664025.1	Benin	ERR14364492	NA	Benin	West Africa						2019
ERR14364493	SAMEA117685693	NA	PDT002664026.1	Benin	ERR14364493	NA	Benin	West Africa						2019
ERR14364494	SAMEA117685694	NA	PDT002664027.1	Benin	ERR14364494	NA	Benin	West Africa						2019
ERR14364495	SAMEA117685608	NA	PDT002664028.1	Togo	ERR14364495	NA	Togo	West Africa						2020
ERR14364496	SAMEA117685609	NA	PDT002664029.1	Togo	ERR14364496	NA	Togo	West Africa						2020
ERR14364497	SAMEA117685610	NA	PDT002664030.1	Togo	ERR14364497	NA	Togo	West Africa						2020
ERR14364498	SAMEA117685611	NA	PDT002664031.1	Togo	ERR14364498	NA	Togo	West Africa						2020
ERR14364499	SAMEA117685612	NA	PDT002664032.1	Togo	ERR14364499	NA	Togo	West Africa						2020
ERR14364500	SAMEA117685613	NA	PDT002664033.1	Togo	ERR14364500	NA	Togo	West Africa						2020
ERR14364501	SAMEA117685614	NA	PDT002664034.1	Togo	ERR14364501	NA	Togo	West Africa						2020
ERR14364502	SAMEA117685615	NA	PDT002664035.1	Togo	ERR14364502	NA	Togo	West Africa						2020
ERR14364503	SAMEA117685616	NA	PDT002664036.1	Togo	ERR14364503	NA	Togo	West Africa						2020
ERR14364504	SAMEA117685617	NA	PDT002664037.1	Togo	ERR14364504	NA	Togo	West Africa						2020
ERR14364505	SAMEA117685618	NA	PDT002664038.1	Togo	ERR14364505	NA	Togo	West Africa						2020
ERR14364506	SAMEA117685710	NA	PDT002664039.1	Niger	ERR14364506	NA	Niger	West Africa						2018
ERR14364507	SAMEA117685711	NA	PDT002664040.1	Niger	ERR14364507	NA	Niger	West Africa						2018
ERR14882210	SAMEA118140331	NI00452687	PDT002738983.1	South Africa	ERR14882210	NA	South Africa	Southern Africa			Clinical (Human)		Clinical	2025
SRR32844529	SAMN47379433	MLK169	PDT002890507.1	Kenya: Nairobi	SRR32844529	1.2899 S 36.8479 E	Kenya	East Africa		Nairobi	Clinical (Human)	Human	Clinical	2022
ERR16793724	SAMEA121950725	NA	PDT003140806.1	Somalia	ERR16793724	NA	Somalia	East Africa			Clinical (Human)		Clinical	2018
GCA_000167935.2	SAMN02435881	V52	PDT000005935.3	Sudan	NA	NA	Sudan	North Africa
GCA_000237505.2	SAMN00765533	2010EL-1749	PDT000012099.2	Cameroon	NA	NA	Cameroon	Central Africa			Clinical (Human)	Human	Clinical	2010
GCA_000237645.2	SAMN00765520	2011EL-1137	PDT000012106.2	South Africa	NA	NA	South Africa	Southern Africa			Clinical (Human)	Human	Clinical	2009
GCA_000338075.1	SAMN02469666	Inaba G4222	PDT000010885.2	South Africa: Gauteng	NA	NA	South Africa	Southern Africa		Gauteng	Clinical (Human)	Human	Clinical	2001
GCA_001247835.1	SAMEA889332	1627	PDT000080553.1	Mozambique	NA	NA	Mozambique	East Africa				Human	Clinical	2005
GCA_001249515.1	SAMEA889210	6191	PDT000080566.1	Kenya: Nairobi	NA	NA	Kenya	East Africa		Nairobi		Human	Clinical	2005
GCA_001251435.1	SAMEA889227	7687	PDT000080579.1	Kenya: Machakos	NA	NA	Kenya	East Africa		Machakos		Human	Clinical	2009
GCA_001251935.1	SAMEA889238	6194	PDT000080581.1	Kenya: Nairobi	NA	NA	Kenya	East Africa		Nairobi		Human	Clinical	2007
GCA_001252775.1	SAMEA889236	6215	PDT000080615.1	Kenya: Kakuma	NA	NA	Kenya	East Africa		Kakuma		Human	Clinical	2005
GCA_001252875.1	SAMEA889347	A152	PDT000080620.1	Mozambique	NA	NA	Mozambique	East Africa				Human	Clinical	1991
GCA_001253035.1	SAMEA889324	1346	PDT000080628.1	Mozambique	NA	NA	Mozambique	East Africa				Human	Clinical	2005
GCA_001253155.1	SAMEA889310	A154	PDT000080634.1	Mozambique	NA	NA	Mozambique	East Africa				Human	Clinical	1991
GCA_001254335.1	SAMEA889185	4784	PDT000080684.1	Tanzania	NA	NA	Tanzania	East Africa				Human	Clinical	2009
GCA_001254675.1	SAMEA889337	A5	PDT000080699.1	Angola	NA	NA	Angola	Central Africa				Human	Clinical	1989
GCA_001255915.1	SAMEA889156	7685	PDT000080755.1	Kenya: Machakos	NA	NA	Kenya	East Africa		Machakos		Human	Clinical	2009
GCA_001257835.1	SAMEA889237	6193	PDT000080835.1	Kenya: Nairobi	NA	NA	Kenya	East Africa		Nairobi		Human	Clinical	2005
GCA_001258535.1	SAMEA889155	7686	PDT000080870.1	Kenya: Machakos	NA	NA	Kenya	East Africa		Machakos		Human	Clinical	2009
GCA_001259475.1	SAMEA889396	6210	PDT000080915.1	Kenya: Nairobi	NA	NA	Kenya	East Africa		Nairobi		Human	Clinical	2007
GCA_001259635.1	SAMEA889339	A68	PDT000080922.1	Egypt	NA	NA	Egypt	North Africa				Human	Clinical	1949
GCA_001260295.1	SAMEA889333	1362	PDT000080950.1	Mozambique	NA	NA	Mozambique	East Africa				Human	Clinical	2005
GCA_001261555.1	SAMEA889242	6201	PDT000081008.1	Kenya: Nairobi	NA	NA	Kenya	East Africa		Nairobi		Human	Clinical	2007
GCA_001857545.1	SAMN05590436	V52	PDT000166779.1	Sudan	NA	12.863 N 30.218 E	Sudan	North Africa				Human	Clinical
GCA_001858455.1	SAMN05427412	CMR021	PDT000166809.1	Cameroon	NA	NA	Cameroon	Central Africa				Human	Clinical	2011
GCA_001858465.1	SAMN05427413	CMR022	PDT000166811.1	Cameroon	NA	NA	Cameroon	Central Africa				Human	Clinical	2011
GCA_001858475.1	SAMN05427410	CMR019	PDT000166810.1	Cameroon	NA	NA	Cameroon	Central Africa				Human	Clinical
GCA_001860285.1	SAMN05425594	CMR008	PDT000166825.1	Cameroon	NA	NA	Cameroon	Central Africa				Human	Clinical	2010
GCA_001860295.1	SAMN05425605	CMR009	PDT000166826.1	Cameroon	NA	NA	Cameroon	Central Africa				Human	Clinical	2010
GCA_001860365.1	SAMN05425724	CMR012	PDT000166829.1	Cameroon	NA	NA	Cameroon	Central Africa				Human	Clinical	2011
GCA_001860385.1	SAMN05426682	CMR013	PDT000166830.1	Cameroon	NA	NA	Cameroon	Central Africa				Human	Clinical	2011
GCA_001860425.1	SAMN05426804	CMR015	PDT000166832.1	Cameroon	NA	NA	Cameroon	Central Africa				Human	Clinical	2011
GCA_001860465.1	SAMN05427118	CMR017	PDT000166834.1	Cameroon	NA	NA	Cameroon	Central Africa				Human	Clinical	2011
GCA_001887615.1	SAMN04256438	NCTC9420	PDT000167463.1	Egypt	NA	NA	Egypt	North Africa						1954
GCA_002076155.1	SAMN06144956	O1S	PDT000200735.1	Tanzania: SINGIDA	NA	4.48 S 34.44 E	Tanzania	East Africa		SINGIDA	Clinical (Human)	Human	Clinical
GCA_002076165.1	SAMN06144954	O7S	PDT000200734.1	Tanzania: SINGIDA	NA	4.48 S 34.44 E	Tanzania	East Africa		SINGIDA	Clinical (Human)	Human	Clinical
GCA_002076175.1	SAMN06144957	O6MU	PDT000200736.1	Tanzania: MARA	NA	1.47 S 34.03 E	Tanzania	East Africa		MARA	Clinical (Human)	Human	Clinical
GCA_002076185.1	SAMN06144955	11S	PDT000200737.1	Tanzania: SINGIDA	NA	4.48 S 34.44 E	Tanzania	East Africa		SINGIDA	Clinical (Human)	Human	Clinical
GCA_002076235.1	SAMN06144960	TEM/25/01-004	PDT000200739.1	Tanzania: DAR ES SALAAM	NA	6.46 S 39.12 E	Tanzania	East Africa		DAR ES SALAAM	Clinical (Human)	Human	Clinical
GCA_002076245.1	SAMN06144958	O9S	PDT000200738.1	Tanzania: SINGIDA	NA	4.48 S 34.44 E	Tanzania	East Africa		SINGIDA	Clinical (Human)	Human	Clinical
GCA_002076255.1	SAMN06144959	O2	PDT000200740.1	Tanzania: KIGOMA	NA	4.52 S 29.38 E	Tanzania	East Africa		KIGOMA	Clinical (Human)	Human	Clinical
GCA_002076265.1	SAMN06144962	TEM/10/01-002	PDT000200741.1	Tanzania: DAR ES SALAAM	NA	6.46 S 39.12 E	Tanzania	East Africa		DAR ES SALAAM	Clinical (Human)	Human	Clinical
GCA_002076315.1	SAMN06144963	48055	PDT000200742.1	Tanzania: DAR ES SALAAM	NA	6.46 S 39.12 E	Tanzania	East Africa		DAR ES SALAAM	Clinical (Human)	Human	Clinical
GCA_002076415.1	SAMN06144940	7714	PDT000200748.1	Tanzania: DAR ES SALAAM	NA	6.46 S 39.12 E	Tanzania	East Africa		DAR ES SALAAM	Clinical (Human)	Human	Clinical
GCA_002076425.1	SAMN06144937	1Mo	PDT000200747.1	Tanzania: MOROGORO	NA	6.49 S 37.40 E	Tanzania	East Africa		MOROGORO	Clinical (Human)	Human	Clinical
GCA_002076455.1	SAMN06144938	OO4	PDT000200749.1	Tanzania: DAR ES SALAAM	NA	6.46 S 39.12 E	Tanzania	East Africa		DAR ES SALAAM	Clinical (Human)	Human	Clinical
GCA_002076465.1	SAMN06144942	O3MU	PDT000200750.1	Tanzania: MARA	NA	1.47 S 34.03 E	Tanzania	East Africa		MARA	Clinical (Human)	Human	Clinical
GCA_002076475.1	SAMN06144946	39Ki	PDT000200752.1	Tanzania: KIGOMA	NA	4.52 S 29.38 E	Tanzania	East Africa		KIGOMA	Clinical (Human)	Human	Clinical
GCA_002076485.1	SAMN06144950	47623	PDT000200751.1	Tanzania: DAR ES SALAAM	NA	6.46 S 39.12 E	Tanzania	East Africa		DAR ES SALAAM	Clinical (Human)	Human	Clinical
GCA_002076535.1	SAMN06144951	31Ki	PDT000200753.1	Tanzania: KIGOMA	NA	4.52 S 29.38 E	Tanzania	East Africa		KIGOMA	Clinical (Human)	Human	Clinical
GCA_002076545.1	SAMN06144953	O7MU	PDT000200754.1	Tanzania: MARA	NA	1.47 S 34.03 E	Tanzania	East Africa		MARA	Clinical (Human)	Human	Clinical
GCA_002076575.1	SAMN06144943	O3S	PDT000200755.1	Tanzania: SINGIDA	NA	4.48 S 34.44 E	Tanzania	East Africa		SINGIDA	Clinical (Human)	Human	Clinical
GCA_002076585.1	SAMN06144941	O5MU	PDT000200756.1	Tanzania: MARA	NA	1.47 S 34.03 E	Tanzania	East Africa		MARA	Clinical (Human)	Human	Clinical
GCA_002076615.1	SAMN06144944	7Mo	PDT000200757.1	Tanzania: MOROGORO	NA	6.49 S 37.40 E	Tanzania	East Africa		MOROGORO	Clinical (Human)	Human	Clinical
GCA_002076635.1	SAMN06144945	9Mo	PDT000200758.1	Tanzania: MOROGORO	NA	6.49 S 37.40 E	Tanzania	East Africa		MOROGORO	Clinical (Human)	Human	Clinical
GCA_002076645.1	SAMN06144947	47610	PDT000200759.1	Tanzania: DAR ES SALAAM	NA	6.46 S 39.12 E	Tanzania	East Africa		DAR ES SALAAM	Clinical (Human)	Human	Clinical
GCA_002076665.1	SAMN06144948	5Mo	PDT000200760.1	Tanzania: MOROGORO	NA	6.49 S 37.40 E	Tanzania	East Africa		MOROGORO	Clinical (Human)	Human	Clinical
GCA_002076695.1	SAMN06144949	8Mo	PDT000200762.1	Tanzania: MOROGORO	NA	6.49 S 37.40 E	Tanzania	East Africa		MOROGORO	Clinical (Human)	Human	Clinical
GCA_002076705.1	SAMN06144952	2Mo	PDT000200761.1	Tanzania: MOROGORO	NA	6.49 S 37.40 E	Tanzania	East Africa		MOROGORO	Clinical (Human)	Human	Clinical
GCA_002076735.1	SAMN06144961	TEM/12/12-001	PDT000200763.1	Tanzania: DAR ES SALAAM	NA	6.46 S 39.12 E	Tanzania	East Africa		DAR ES SALAAM	Clinical (Human)	Human	Clinical
GCA_002076745.1	SAMN06144964	TEM/04/01-001	PDT000200764.1	Tanzania: DAR ES SALAAM	NA	6.46 S 39.12 E	Tanzania	East Africa		DAR ES SALAAM	Clinical (Human)	Human	Clinical
GCA_002076775.1	SAMN06144965	21B	PDT000200765.1	Tanzania: KIGOMA	NA	4.52 S 29.38 E	Tanzania	East Africa		KIGOMA	Clinical (Human)	Human	Clinical
GCA_002076785.1	SAMN06144966	20478	PDT000200766.1	Tanzania: KIGOMA	NA	4.52 S 29.38 E	Tanzania	East Africa		KIGOMA	Clinical (Human)	Human	Clinical
GCA_002078055.1	SAMN06126943	36KI	PDT000200816.1	Tanzania:Kigoma	NA	4.52 S 29.38 E	Tanzania	East Africa		Kigoma	Clinical (Human)	Human	Clinical
GCA_002078595.1	SAMN06144971	43Ki	PDT000200840.1	Tanzania: Kigoma	NA	4.52 S 29.38 E	Tanzania	East Africa		Kigoma	Clinical (Human)	Human	Clinical
GCA_002078635.1	SAMN06144968	39361	PDT000200841.1	Tanzania: Dar Es Salaam	NA	6.46 S 39.12 E	Tanzania	East Africa		Dar Es Salaam	Clinical (Human)	Human	Clinical
GCA_002078695.1	SAMN06144972	TEM/15/01-005	PDT000200846.1	Tanzania: Dar Es Salaam	NA	6.46 S 39.12 E	Tanzania	East Africa		Dar Es Salaam	Clinical (Human)	Human	Clinical
GCA_002078705.1	SAMN06144967	21027	PDT000200844.1	Tanzania: Kigoma	NA	4.52 S 29.38 E	Tanzania	East Africa		Kigoma	Clinical (Human)	Human	Clinical
GCA_002078715.1	SAMN06144974	19886	PDT000200845.1	Tanzania: Kigoma	NA	4.52 S 29.38 E	Tanzania	East Africa		Kigoma	Clinical (Human)	Human	Clinical
GCA_002078755.1	SAMN06144970	TEM/29/01-003	PDT000200848.1	Tanzania: DAR ES SALAAM	NA	6.46 S 39.12 E	Tanzania	East Africa		DAR ES SALAAM	Clinical (Human)	Human	Clinical
GCA_002078795.1	SAMN06144973	J8YRS KAGUNGA	PDT000200849.1	Tanzania: Kigoma	NA	4.52 S 29.38 E	Tanzania	East Africa		Kigoma	Clinical (Human)	Human	Clinical
GCA_002078815.1	SAMN06144969	20390	PDT000200850.1	Tanzania: Kigoma	NA	4.52 S 29.38 E	Tanzania	East Africa		Kigoma	Clinical (Human)	Human	Clinical
GCA_002078825.1	SAMN06144975	17609	PDT000200851.1	Tanzania: Kigoma	NA	4.52 S 29.38 E	Tanzania	East Africa		Kigoma	Clinical (Human)	Human	Clinical
GCA_002097735.1	SAMN06263906	CISM_300055	PDT000204561.1	Mozambique: Manhica	NA	NA	Mozambique	East Africa		Manhica	Clinical (Human)	Human	Clinical	2008
GCA_002097745.1	SAMN06263907	CISM_300205	PDT000204563.1	Mozambique: Manhica	NA	NA	Mozambique	East Africa		Manhica	Clinical (Human)	Human	Clinical	2008
GCA_002097765.1	SAMN06263904	CISM_S/Nida	PDT000204562.1	Mozambique: Manhica	NA	NA	Mozambique	East Africa		Manhica	Clinical (Human)	Human	Clinical
GCA_002097825.1	SAMN06263903	CISM_780298.0	PDT000204564.1	Mozambique: Manhica	NA	NA	Mozambique	East Africa		Manhica	Clinical (Human)	Human	Clinical
GCA_002097835.1	SAMN06263902	CISM_770180.8	PDT000204566.1	Mozambique: Manhica	NA	NA	Mozambique	East Africa		Manhica	Clinical (Human)	Human	Clinical
GCA_002097845.1	SAMN06263901	CISM_770067.4	PDT000204567.1	Mozambique: Manhica	NA	NA	Mozambique	East Africa		Manhica	Clinical (Human)	Human	Clinical
GCA_002097895.1	SAMN06263898	CISM_710180.8	PDT000204569.1	Mozambique: Manhica	NA	NA	Mozambique	East Africa		Manhica	Clinical (Human)	Human	Clinical
GCA_002097905.1	SAMN06263899	CISM_740115.4	PDT000204568.1	Mozambique: Manhica	NA	NA	Mozambique	East Africa		Manhica	Clinical (Human)	Human	Clinical
GCA_002097915.1	SAMN06263900	CISM_769845.7	PDT000204571.1	Mozambique: Manhica	NA	NA	Mozambique	East Africa		Manhica	Clinical (Human)	Human	Clinical
GCA_002097925.1	SAMN06263897	CISM_655665.0	PDT000204570.1	Mozambique: Manhica	NA	NA	Mozambique	East Africa		Manhica	Clinical (Human)	Human	Clinical
GCA_002097975.1	SAMN06263895	CISM_655630.3	PDT000204574.1	Mozambique: Manhica	NA	NA	Mozambique	East Africa		Manhica	Clinical (Human)	Human	Clinical
GCA_002097985.1	SAMN06263894	CISM_511	PDT000204572.1	Mozambique: Manhica	NA	NA	Mozambique	East Africa		Manhica	Clinical (Human)	Human	Clinical
GCA_002097995.1	SAMN06263896	CISM_655664.3	PDT000204575.1	Mozambique: Manhica	NA	NA	Mozambique	East Africa		Manhica	Clinical (Human)	Human	Clinical
GCA_002098005.1	SAMN06263893	CISM_510	PDT000204573.1	Mozambique: Manhica	NA	NA	Mozambique	East Africa		Manhica	Clinical (Human)	Human	Clinical
GCA_002098055.1	SAMN06263891	CISM_420	PDT000204576.1	Mozambique: Manhica	NA	NA	Mozambique	East Africa		Manhica	Clinical (Human)	Human	Clinical
GCA_002098065.1	SAMN06263892	CISM_505	PDT000204577.1	Mozambique: Manhica	NA	NA	Mozambique	East Africa		Manhica	Clinical (Human)	Human	Clinical
GCA_002098075.1	SAMN06263890	CISM_399	PDT000204578.1	Mozambique: Manhica	NA	NA	Mozambique	East Africa		Manhica	Clinical (Human)	Human	Clinical
GCA_002098085.1	SAMN06263889	CISM_398	PDT000204579.1	Mozambique: Manhica	NA	NA	Mozambique	East Africa		Manhica	Clinical (Human)	Human	Clinical
GCA_002098135.1	SAMN06263888	CISM_382	PDT000204582.1	Mozambique: Manhica	NA	NA	Mozambique	East Africa		Manhica	Clinical (Human)	Human	Clinical
GCA_002098145.1	SAMN06263887	CISM_375	PDT000204580.1	Mozambique: Manhica	NA	NA	Mozambique	East Africa		Manhica	Clinical (Human)	Human	Clinical
GCA_002098155.1	SAMN06263886	CISM_374	PDT000204581.1	Mozambique: Manhica	NA	NA	Mozambique	East Africa		Manhica	Clinical (Human)	Human	Clinical
GCA_002098195.1	SAMN06263885	CISM_347	PDT000204583.1	Mozambique: Manhica	NA	NA	Mozambique	East Africa		Manhica	Clinical (Human)	Human	Clinical
GCA_002098215.1	SAMN06263884	CISM_326	PDT000204586.1	Mozambique: Manhica	NA	NA	Mozambique	East Africa		Manhica	Clinical (Human)	Human	Clinical
GCA_002098225.1	SAMN06263882	CISM_302015	PDT000204584.1	Mozambique: Manhica	NA	NA	Mozambique	East Africa		Manhica	Clinical (Human)	Human	Clinical	2009
GCA_002098235.1	SAMN06263883	CISM_302029	PDT000204585.1	Mozambique: Manhica	NA	NA	Mozambique	East Africa		Manhica	Clinical (Human)	Human	Clinical	2009
GCA_002098255.1	SAMN06263881	CISM_300215	PDT000204587.1	Mozambique: Manhica	NA	NA	Mozambique	East Africa		Manhica	Clinical (Human)	Human	Clinical	2008
GCA_002098295.1	SAMN06263878	CISM_300043	PDT000204589.1	Mozambique: Manhica	NA	NA	Mozambique	East Africa		Manhica	Clinical (Human)	Human	Clinical	2008
GCA_002098305.1	SAMN06263877	CISM_296	PDT000204588.1	Mozambique: Manhica	NA	NA	Mozambique	East Africa		Manhica	Clinical (Human)	Human	Clinical
GCA_002098335.1	SAMN06263880	CISM_300209	PDT000204591.1	Mozambique: Manhica	NA	NA	Mozambique	East Africa		Manhica	Clinical (Human)	Human	Clinical	2008
GCA_002098345.1	SAMN06263879	CISM_300208	PDT000204590.1	Mozambique: Manhica	NA	NA	Mozambique	East Africa		Manhica	Clinical (Human)	Human	Clinical	2008
GCA_002098355.1	SAMN06263876	CISM_196	PDT000204592.1	Mozambique: Manhica	NA	NA	Mozambique	East Africa		Manhica	Clinical (Human)	Human	Clinical	2003
GCA_002098365.1	SAMN06263875	CISM_191	PDT000204593.1	Mozambique: Manhica	NA	NA	Mozambique	East Africa		Manhica	Clinical (Human)	Human	Clinical	2003
GCA_002098415.1	SAMN06263873	CISM_188	PDT000204595.1	Mozambique: Manhica	NA	NA	Mozambique	East Africa		Manhica	Clinical (Human)	Human	Clinical	2003
GCA_002098425.1	SAMN06263874	CISM_189	PDT000204596.1	Mozambique: Manhica	NA	NA	Mozambique	East Africa		Manhica	Clinical (Human)	Human	Clinical	2003
GCA_002098435.1	SAMN06263872	CISM_179	PDT000204594.1	Mozambique: Manhica	NA	NA	Mozambique	East Africa		Manhica	Clinical (Human)	Human	Clinical	2003
GCA_002098445.1	SAMN06263871	CISM_178	PDT000204597.1	Mozambique: Manhica	NA	NA	Mozambique	East Africa		Manhica	Clinical (Human)	Human	Clinical	2003
GCA_002098495.1	SAMN06263868	CISM_152	PDT000204598.1	Mozambique: Manhica	NA	NA	Mozambique	East Africa		Manhica	Clinical (Human)	Human	Clinical	2003
GCA_002098515.1	SAMN06263870	CISM_154	PDT000204599.1	Mozambique: Manhica	NA	NA	Mozambique	East Africa		Manhica	Clinical (Human)	Human	Clinical	2003
GCA_002098525.1	SAMN06263867	CISM_151	PDT000204600.1	Mozambique: Manhica	NA	NA	Mozambique	East Africa		Manhica	Clinical (Human)	Human	Clinical	2003
GCA_002098535.1	SAMN06263869	CISM_153	PDT000204601.1	Mozambique: Manhica	NA	NA	Mozambique	East Africa		Manhica	Clinical (Human)	Human	Clinical	2003
GCA_002098555.1	SAMN06263866	CISM_147	PDT000204602.1	Mozambique: Manhica	NA	NA	Mozambique	East Africa		Manhica	Clinical (Human)	Human	Clinical	2003
GCA_002098595.1	SAMN06263865	CISM_146	PDT000204603.1	Mozambique: Manhica	NA	NA	Mozambique	East Africa		Manhica	Clinical (Human)	Human	Clinical	2003
GCA_002098605.1	SAMN06263863	CISM_122	PDT000204604.1	Mozambique: Manhica	NA	NA	Mozambique	East Africa		Manhica	Clinical (Human)	Human	Clinical	2003
GCA_002098625.1	SAMN06263864	CISM_134	PDT000204605.1	Mozambique: Manhica	NA	NA	Mozambique	East Africa		Manhica	Clinical (Human)	Human	Clinical	2003
GCA_002098655.1	SAMN06263862	CISM_121	PDT000204606.1	Mozambique: Manhica	NA	NA	Mozambique	East Africa		Manhica	Clinical (Human)	Human	Clinical	2003
GCA_002098675.1	SAMN06263861	CISM_120	PDT000204607.1	Mozambique: Manhica	NA	NA	Mozambique	East Africa		Manhica	Clinical (Human)	Human	Clinical	2003
GCA_002098695.1	SAMN06263860	CISM_105	PDT000204608.1	Mozambique: Manhica	NA	NA	Mozambique	East Africa		Manhica	Clinical (Human)	Human	Clinical	2003
GCA_002098705.1	SAMN06263859	CISM_1020234.0	PDT000204609.1	Mozambique: Manhica	NA	NA	Mozambique	East Africa		Manhica	Clinical (Human)	Human	Clinical	2010
GCA_002098715.1	SAMN06263858	CISM_1020231.9	PDT000204610.1	Mozambique: Manhica	NA	NA	Mozambique	East Africa		Manhica	Clinical (Human)	Human	Clinical	2010
GCA_002098755.1	SAMN06263857	CISM_1020229.6	PDT000204611.1	Mozambique: Manhica	NA	NA	Mozambique	East Africa		Manhica	Clinical (Human)	Human	Clinical	2010
GCA_002098765.1	SAMN06263856	CISM_101	PDT000204612.1	Mozambique: Manhica	NA	NA	Mozambique	East Africa		Manhica	Clinical (Human)	Human	Clinical	2003
GCA_002098795.1	SAMN06263855	CISM_1019829.2	PDT000204613.1	Mozambique: Manhica	NA	NA	Mozambique	East Africa		Manhica	Clinical (Human)	Human	Clinical	2010
GCA_002098805.1	SAMN06263854	CISM_1019828.5	PDT000204614.1	Mozambique: Manhica	NA	NA	Mozambique	East Africa		Manhica	Clinical (Human)	Human	Clinical	2010
GCA_002098835.1	SAMN06263853	CISM_100	PDT000204615.1	Mozambique: Manhica	NA	NA	Mozambique	East Africa		Manhica	Clinical (Human)	Human	Clinical	2003
GCA_002098845.1	SAMN06263852	CISM_091	PDT000204616.1	Mozambique: Manhica	NA	NA	Mozambique	East Africa		Manhica	Clinical (Human)	Human	Clinical
GCA_002098875.1	SAMN06263850	CISM_0079	PDT000204617.1	Mozambique: Manhica	NA	NA	Mozambique	East Africa		Manhica	Clinical (Human)	Human	Clinical	2003
GCA_002098885.1	SAMN06263851	CISM_0091	PDT000204618.1	Mozambique: Manhica	NA	NA	Mozambique	East Africa		Manhica	Clinical (Human)	Human	Clinical	2003
GCA_002098915.1	SAMN06263849	CISM_0074	PDT000204619.1	Mozambique: Manhica	NA	NA	Mozambique	East Africa		Manhica	Clinical (Human)	Human	Clinical	2003
GCA_002098935.1	SAMN06263848	CISM_0035	PDT000204620.1	Mozambique: Manhica	NA	NA	Mozambique	East Africa		Manhica	Clinical (Human)	Human	Clinical	2002
GCA_002098955.1	SAMN06263847	CISM_0034	PDT000204621.1	Mozambique: Manhica	NA	NA	Mozambique	East Africa		Manhica	Clinical (Human)	Human	Clinical	2002
GCA_002098965.1	SAMN06263846	CISM_0019	PDT000204622.1	Mozambique: Manhica	NA	NA	Mozambique	East Africa		Manhica	Clinical (Human)	Human	Clinical	2002
GCA_002098995.1	SAMN06263845	CISM_0018	PDT000204623.1	Mozambique: Manhica	NA	NA	Mozambique	East Africa		Manhica	Clinical (Human)	Human	Clinical	2002
GCA_002099015.1	SAMN06263844	CISM_0017	PDT000204624.1	Mozambique: Manhica	NA	NA	Mozambique	East Africa		Manhica	Clinical (Human)	Human	Clinical	2002
GCA_002099035.1	SAMN06263843	CISM_0016	PDT000204625.1	Mozambique: Manhica	NA	NA	Mozambique	East Africa		Manhica	Clinical (Human)	Human	Clinical	2002
GCA_002099055.1	SAMN06263842	CISM_0015	PDT000204626.1	Mozambique: Manhica	NA	NA	Mozambique	East Africa		Manhica	Clinical (Human)	Human	Clinical	2002
GCA_002099065.1	SAMN06263841	CISM_0014	PDT000204627.1	Mozambique: Manhica	NA	NA	Mozambique	East Africa		Manhica	Environmental (Water)	Human	Clinical	2002
GCA_002099095.1	SAMN06263840	CISM_0010	PDT000204628.1	Mozambique: Manhica	NA	NA	Mozambique	East Africa		Manhica	Environmental (Water)	Human	Clinical	2002
GCA_002099115.1	SAMN06263839	CISM_0008	PDT000204629.1	Mozambique: Manhica	NA	NA	Mozambique	East Africa		Manhica	Environmental (Water)	Human	Clinical	2005
GCA_002099125.1	SAMN06263838	CISM_0005	PDT000204630.1	Mozambique: Manhica	NA	NA	Mozambique	East Africa		Manhica	Clinical (Human)	Human	Clinical	2002
GCA_002102575.1	SAMN06099135	G_33	PDT000204767.1	Guinea: Forecariah	NA	9.26 N 13.05 W	Guinea	West Africa		Forecariah	Clinical (Human)	Human	Clinical	1986
GCA_003205555.1	SAMN08744335	UG054	PDT000331179.1	Uganda: Hoima	NA	0.3309 N 32.5761 E	Uganda	East Africa		Hoima	Clinical (Human)	Human	Clinical
GCA_003205565.1	SAMN08744334	UG046	PDT000331178.1	Uganda: Kasese	NA	0.3309 N 32.5761 E	Uganda	East Africa		Kasese	Clinical (Human)	Human	Clinical
GCA_003205635.1	SAMN08744331	UG020	PDT000331182.1	Uganda: Mbale	NA	0.3309 N 32.5761 E	Uganda	East Africa		Mbale	Clinical (Human)	Human	Clinical
GCA_003205655.1	SAMN08744333	UG042	PDT000331183.1	Uganda: Kasese	NA	0.3309 N 32.5761 E	Uganda	East Africa		Kasese	Clinical (Human)	Human	Clinical
GCA_003205675.1	SAMN08744329	UG086	PDT000331184.1	Uganda: Hoima	NA	0.3309 N 32.5761 E	Uganda	East Africa		Hoima	Clinical (Human)	Human	Clinical
GCA_003205685.1	SAMN08744332	UG026	PDT000331186.1	Uganda: Kasese	NA	0.3309 N 32.5761 E	Uganda	East Africa		Kasese	Clinical (Human)	Human	Clinical
GCA_003205705.1	SAMN08744328	UG071	PDT000331185.1	Uganda: Arua	NA	0.3309 N 32.5761 E	Uganda	East Africa		Arua	Clinical (Human)	Human	Clinical
GCA_003205735.1	SAMN08744326	UG040	PDT000331187.1	Uganda: Arua	NA	0.3309 N 32.5761 E	Uganda	East Africa		Arua	Clinical (Human)	Human	Clinical
GCA_003205755.1	SAMN08744327	UG060	PDT000331188.1	Uganda: Moyo	NA	0.3309 N 32.5761 E	Uganda	East Africa		Moyo	Clinical (Human)	Human	Clinical
GCA_003205765.1	SAMN08744330	UG010	PDT000331189.1	Uganda: Mbale	NA	0.3309 N 32.5761 E	Uganda	East Africa		Mbale	Clinical (Human)	Human	Clinical
GCA_009799825.1	SAMN13613314	NA	PDT000663379.1	Democratic Republic of the Congo	NA	0.21 N 29.43 E	Democratic Republic of the Congo	Central Africa			Clinical (Human)	Human	Clinical	2015
GCA_012911575.1	SAMN14364270	YA00120881	PDT000729047.1	Zimbabwe	NA	17.824858 S 31.053028 E	Zimbabwe	East Africa			Clinical (Human)	Human	Clinical	2018
GCA_013085145.1	SAMN13735001	DRC-193A	PDT000735126.1	Democratic Republic of the Congo	NA	NA	Democratic Republic of the Congo	Central Africa				Human	Clinical	2011
GCA_018398015.1	SAMN19110433	TDS0091210	PDT001043534.1	Tanzania: Kigoma	NA	4.8819766 S 29.6153597 E	Tanzania	East Africa		Kigoma	Clinical (Human)	Human	Clinical	2017
GCA_018398025.1	SAMN19110437	MZA-2	PDT001043532.1	Tanzania: Mwanza	NA	2.5034071 S 32.9007276 E	Tanzania	East Africa		Mwanza	Clinical (Human)	Human	Clinical	2016
GCA_018398035.1	SAMN19110438	TDS0062073	PDT001043533.1	Tanzania: Dodoma	NA	6.172943 S 35.7031099 E	Tanzania	East Africa		Dodoma	Clinical (Human)	Human	Clinical	2016
GCA_018398045.1	SAMN19110441	TDS0063486	PDT001043535.1	Tanzania: Dar Es Salaam	NA	6.7695712 S 39.1142053 E	Tanzania	East Africa		Dar Es Salaam	Clinical (Human)	Human	Clinical	2017
GCA_018398085.1	SAMN19110439	TDS0061619	PDT001043536.1	Tanzania: Mara	NA	1.4999999 S 34.5412452 E	Tanzania	East Africa		Mara	Clinical (Human)	Human	Clinical	2016
GCA_018398115.1	SAMN19110428	TDS0069928	PDT001043537.1	Tanzania: Dar Es Salaam	NA	6.7695712 S 39.1142053 E	Tanzania	East Africa		Dar Es Salaam	Clinical (Human)	Human	Clinical	2017
GCA_018398135.1	SAMN19110430	TDS0093113	PDT001043538.1	Tanzania: Mbeya	NA	8.9052093 S 33.38241 E	Tanzania	East Africa		Mbeya	Clinical (Human)	Human	Clinical	2017
GCA_018398155.1	SAMN19110431	TDS0091212	PDT001043539.1	Tanzania: Kigoma	NA	4.8819766 S 29.6153597 E	Tanzania	East Africa		Kigoma	Clinical (Human)	Human	Clinical	2017
GCA_018398195.1	SAMN19110443	TDS0098348	PDT001043542.1	Tanzania: Ruvuma	NA	10.4984402 S 35.2204579 E	Tanzania	East Africa		Ruvuma	Clinical (Human)	Human	Clinical	2017
GCA_018398205.1	SAMN19110444	TDS0060988	PDT001043541.1	Tanzania: Dar Es Salaam	NA	6.7695712 S 39.1142053 E	Tanzania	East Africa		Dar Es Salaam	Clinical (Human)	Human	Clinical	2016
GCA_018398235.1	SAMN19110435	TDS0062694	PDT001043543.1	Tanzania: Pwani	NA	7.1778034 S 37.7318499 E	Tanzania	East Africa		Pwani	Clinical (Human)	Human	Clinical	2017
GCA_018398255.1	SAMN19110442	TDS0069929	PDT001043544.1	Tanzania: Dar Es Salaam	NA	6.7695712 S 39.1142053 E	Tanzania	East Africa		Dar Es Salaam	Clinical (Human)	Human	Clinical	2017
GCA_018916525.1	SAMN19110432	TDS0087979	PDT001072875.1	Tanzania: Mbeya	NA	8.9052093 S 33.38241 E	Tanzania	East Africa		Mbeya	Clinical (Human)	Human	Clinical	2017
GCA_018916535.1	SAMN19110434	TDS0061617	PDT001072876.1	Tanzania: Mara	NA	1.4999999 S 34.5412452 E	Tanzania	East Africa		Mara	Clinical (Human)	Human	Clinical	2016
GCA_018916555.1	SAMN19110427	TDS0087994	PDT001072877.1	Tanzania: Mbeya	NA	8.9052093 S 33.38241 E	Tanzania	East Africa		Mbeya	Clinical (Human)	Human	Clinical	2017
GCA_018916585.1	SAMN19110440	TDS0062252	PDT001072879.1	Tanzania: Arusha	NA	3.3981431 S 36.6421933 E	Tanzania	East Africa		Arusha	Clinical (Human)	Human	Clinical	2016
GCA_018929285.1	SAMN17861264	1033_Lusaka_2016	PDT001072884.1	Zambia: Lusaka	NA	15.3875 S 28.3228 E	Zambia	East Africa		Lusaka	Clinical (Human)	Human	Clinical	2016
GCA_018929315.1	SAMN17861266	1034_Lusaka_2016	PDT001072885.1	Zambia: Lusaka	NA	15.3875 S 28.3228 E	Zambia	East Africa		Lusaka	Clinical (Human)	Human	Clinical	2016
GCA_018929375.1	SAMN17861259	1162_Lusaka_2016	PDT001072886.1	Zambia: Lusaka	NA	15.3875 S 28.3228 E	Zambia	East Africa		Lusaka	Clinical (Human)	Human	Clinical	2016
GCA_018929395.1	SAMN17861260	38_Lusaka_2009	PDT001072887.1	Zambia: Lusaka	NA	15.3875 S 28.3228 E	Zambia	East Africa		Lusaka	Clinical (Human)	Human	Clinical	2009
GCA_018929415.1	SAMN17861258	1142_Lusaka_2016	PDT001072888.1	Zambia: Lusaka	NA	15.3875 S 28.3228 E	Zambia	East Africa		Lusaka	Clinical (Human)	Human	Clinical	2016
GCA_018929475.1	SAMN17861256	1109_Lusaka_2016	PDT001072890.1	Zambia: Lusaka	NA	15.3875 S 28.3228 E	Zambia	East Africa		Lusaka	Clinical (Human)	Human	Clinical	2016
GCA_018929625.1	SAMN17861253	9_Lusaka_2018	PDT001072893.1	Zambia: Lusaka	NA	15.3875 S 28.3228 E	Zambia	East Africa		Lusaka	Clinical (Human)	Human	Clinical	2018
GCA_018929655.1	SAMN17861252	11_Lusaka_2018	PDT001072894.1	Zambia: Lusaka	NA	15.3875 S 28.3228 E	Zambia	East Africa		Lusaka	Clinical (Human)	Human	Clinical	2018
GCA_018929675.1	SAMN17861251	7_Lusaka_2018	PDT001072895.1	Zambia: Lusaka	NA	15.3875 S 28.3228 E	Zambia	East Africa		Lusaka	Clinical (Human)	Human	Clinical	2018
GCA_018929815.1	SAMN17861249	5_Lusaka_2018	PDT001072897.1	Zambia: Lusaka	NA	15.3875 S 28.3228 E	Zambia	East Africa		Lusaka	Clinical (Human)	Human	Clinical	2018
GCA_024105835.1	SAMN25185373	PGB-VCH018	PDT001350947.1	Algeria: Ain Taya, Algiers	NA	NA	Algeria	North Africa		Ain Taya, Algiers	Environmental (Water)
GCA_024105855.1	SAMN25185372	PGB-VCH005	PDT001350948.1	Algeria: Colonel Abbas Beach in Zeralda, Algiers	NA	NA	Algeria	North Africa		Colonel Abbas Beach in Zeralda, Algiers	Environmental (Water)
GCA_025504985.1	SAMN26804331	C23	PDT001440291.1	Ghana: Greater Accra	NA	5.8143 N 0.0747 E	Ghana	West Africa		Greater Accra	Clinical (Human)	Human	Clinical	2014
GCA_025505005.1	SAMN26804330	C22	PDT001440292.1	Ghana: Greater Accra	NA	5.8143 N 0.0747 E	Ghana	West Africa		Greater Accra	Clinical (Human)	Human	Clinical	2011
GCA_025505035.1	SAMN26804329	C17	PDT001440293.1	Ghana: Greater Accra	NA	5.8143 N 0.0747 E	Ghana	West Africa		Greater Accra	Clinical (Human)	Human	Clinical	2014
GCA_025505055.1	SAMN26804328	C14	PDT001440294.1	Ghana: Greater Accra	NA	5.8143 N 0.0747 E	Ghana	West Africa		Greater Accra	Clinical (Human)	Human	Clinical	2015
GCA_025505075.1	SAMN26804327	C6	PDT001440295.1	Ghana: Greater Accra	NA	5.8143 N 0.0747 E	Ghana	West Africa		Greater Accra	Clinical (Human)	Human	Clinical	2010
GCA_025505095.1	SAMN26804326	C1	PDT001440296.1	Ghana: Greater Accra	NA	5.8143 N 0.0747 E	Ghana	West Africa		Greater Accra	Clinical (Human)	Human	Clinical	2010
GCA_025505115.1	SAMN26804325	E32	PDT001440297.1	Ghana: Korle-Gonno Lake	NA	5.5328 N 0.2268 W	Ghana	West Africa		Korle-Gonno Lake	Environmental (Water)		Environmental	2016
GCA_025505135.1	SAMN26804324	E30	PDT001440298.1	Ghana: Korle-Gonno Lake	NA	5.5328 N 0.2268 W	Ghana	West Africa		Korle-Gonno Lake	Environmental (Water)		Environmental	2016
GCA_025505155.1	SAMN26804323	E19	PDT001440299.1	Ghana: Korle-Gonno Lake	NA	5.5328 N 0.2268 W	Ghana	West Africa		Korle-Gonno Lake	Environmental (Water)		Environmental	2016
[truncated: 1,077 more rows]

## Sheet: Table S2
Sample	Completeness	Contamination	Completeness_Model_Used	Translation_Table_Used	Coding_Density	Contig_N50	Average_Gene_Length	Genome_Size	GC_Content	Total_Coding_Sequences	Total_Contigs	Max_Contig_Length	Additional_Notes
ERR11679330	100	0.02	Neural Network (Specific Model)	11	0.877	246679	329.672	4022884	0.47	3570	67	595292	None
ERR11679331	100	0.02	Neural Network (Specific Model)	11	0.876	247058	329.341	4026201	0.47	3574	70	595197	None
ERR11679334	100	0.02	Neural Network (Specific Model)	11	0.876	246703	329.579	4027113	0.47	3572	69	595606	None
ERR11679340	100	0.02	Neural Network (Specific Model)	11	0.876	246703	329.725	4026929	0.47	3569	71	595606	None
ERR11679342	100	0.02	Neural Network (Specific Model)	11	0.877	246679	329.544	4024757	0.47	3573	68	595197	None
ERR11679361	100	0.02	Neural Network (Specific Model)	11	0.877	250094	329.585	4023321	0.47	3572	65	595292	None
ERR11713375	100	0.02	Neural Network (Specific Model)	11	0.876	246679	329.524	4024405	0.48	3572	70	595192	None
ERR11713376	100	0.02	Neural Network (Specific Model)	11	0.877	250094	329.551	4024477	0.47	3573	66	595192	None
ERR13296470	100	0.02	Neural Network (Specific Model)	11	0.876	235769	328.875	4034904	0.47	3588	69	590201	None
ERR13296484	100	0.02	Neural Network (Specific Model)	11	0.876	235775	329.739	4033927	0.47	3578	64	590203	None
ERR13296485	100	0.02	Neural Network (Specific Model)	11	0.876	235769	329.154	4035177	0.47	3584	67	595571	None
ERR13296486	100	0.02	Neural Network (Specific Model)	11	0.875	235793	329.013	4039832	0.47	3587	68	590551	None
ERR13296487	100	0.02	Neural Network (Specific Model)	11	0.876	235769	329.588	4034356	0.47	3579	65	590201	None
ERR13296489	100	0.02	Neural Network (Specific Model)	11	0.876	235769	329.407	4035344	0.47	3582	65	590201	None
ERR13297991	100	0.02	Neural Network (Specific Model)	11	0.876	235769	329.564	4035876	0.47	3580	67	590748	None
ERR13297992	100	0.02	Neural Network (Specific Model)	11	0.876	235769	329.499	4033758	0.47	3581	67	590301	None
ERR13297995	100	0.02	Neural Network (Specific Model)	11	0.875	235793	329.505	4039790	0.47	3582	66	590720	None
ERR13297997	100	0.02	Neural Network (Specific Model)	11	0.875	235793	329.407	4039743	0.47	3583	62	632640	None
ERR13297998	100	0.02	Neural Network (Specific Model)	11	0.876	235769	329.455	4034657	0.47	3581	65	590202	None
ERR13297999	100	0.02	Neural Network (Specific Model)	11	0.876	231490	328.711	4026775	0.47	3581	66	590749	None
ERR13298001	100	0.02	Neural Network (Specific Model)	11	0.876	235769	329.234	4035152	0.47	3584	67	590201	None
ERR13298125	100	0.02	Neural Network (Specific Model)	11	0.876	246703	329.811	4038121	0.47	3578	63	627695	None
ERR13298126	100	0.02	Neural Network (Specific Model)	11	0.876	235769	329.195	4036032	0.47	3585	68	590206	None
ERR13298127	100	0.02	Neural Network (Specific Model)	11	0.876	198982	329.534	4035284	0.47	3580	66	590201	None
ERR13298128	100	0.02	Neural Network (Specific Model)	11	0.876	231767	329.343	4039420	0.47	3585	63	627695	None
ERR13298130	100	0.02	Neural Network (Specific Model)	11	0.876	246371	329.436	4038960	0.47	3583	63	796049	None
ERR13298131	100	0.02	Neural Network (Specific Model)	11	0.875	235793	329.496	4040164	0.47	3582	70	590281	None
ERR13298132	100	0.02	Neural Network (Specific Model)	11	0.876	235769	329.399	4035237	0.47	3582	65	590201	None
ERR13298134	100	0.02	Neural Network (Specific Model)	11	0.875	235793	329.322	4042017	0.47	3585	60	627695	None
ERR13298135	100	0.03	Neural Network (Specific Model)	11	0.875	235793	329.505	4039711	0.47	3581	64	627695	None
ERR13298136	100	0.02	Neural Network (Specific Model)	11	0.876	234119	329.263	4038430	0.47	3584	66	628138	None
ERR13298137	100	0.02	Neural Network (Specific Model)	11	0.876	235757	330.151	4033038	0.47	3572	69	590189	None
ERR13298140	100	0.02	Neural Network (Specific Model)	11	0.876	235757	329.985	4032891	0.47	3574	68	590288	None
ERR13298142	100	0.02	Neural Network (Specific Model)	11	0.876	235757	329.736	4032364	0.47	3577	69	590194	None
ERR13298144	100	0.02	Neural Network (Specific Model)	11	0.876	235777	329.723	4035670	0.47	3577	59	595318	None
ERR13298145	100	0.02	Neural Network (Specific Model)	11	0.876	235793	329.343	4039377	0.47	3584	62	607396	None
ERR13298147	100	0.02	Neural Network (Specific Model)	11	0.876	235757	329.661	4035491	0.47	3579	68	590189	None
ERR13298148	100	0.02	Neural Network (Specific Model)	11	0.876	235757	329.947	4029367	0.47	3572	72	588117	None
ERR13298149	100	0.02	Neural Network (Specific Model)	11	0.876	235769	329.382	4036305	0.47	3583	62	590201	None
ERR13298152	100	0.02	Neural Network (Specific Model)	11	0.876	235757	330.42	4033058	0.47	3569	66	590363	None
ERR13298153	100	0.02	Neural Network (Specific Model)	11	0.876	235769	329.443	4035009	0.47	3581	63	590201	None
ERR13298155	100	0.02	Neural Network (Specific Model)	11	0.876	235769	329.771	4032441	0.47	3576	64	592503	None
ERR13298156	100	0.02	Neural Network (Specific Model)	11	0.876	235769	329.714	4033822	0.47	3577	62	590849	None
ERR13298157	100	0.02	Neural Network (Specific Model)	11	0.876	235769	329.297	4027335	0.47	3575	64	590200	None
ERR13298159	100	0.02	Neural Network (Specific Model)	11	0.876	235769	329.626	4033171	0.47	3578	63	592503	None
ERR13298160	100	0.02	Neural Network (Specific Model)	11	0.876	235769	329.681	4034634	0.47	3578	63	590201	None
ERR13298161	100	0.02	Neural Network (Specific Model)	11	0.876	247149	329.677	4033555	0.47	3577	66	590745	None
ERR13298162	100	0.03	Neural Network (Specific Model)	11	0.875	235809	329.526	4039280	0.47	3581	62	627592	None
ERR13299295	100	0.02	Neural Network (Specific Model)	11	0.876	235769	330.101	4033091	0.47	3572	62	590749	None
ERR13299665	100	0.03	Neural Network (Specific Model)	11	0.875	235809	329.52	4038623	0.47	3581	58	628034	None
ERR13299669	100	0.02	Neural Network (Specific Model)	11	0.876	235769	329.967	4031527	0.47	3573	62	590849	None
ERR13299672	100	0.03	Neural Network (Specific Model)	11	0.876	235809	329.827	4034755	0.47	3575	58	628154	None
ERR13299673	100	0.03	Neural Network (Specific Model)	11	0.876	235809	329.42	4038334	0.47	3582	62	628155	None
ERR13299674	100	0.03	Neural Network (Specific Model)	11	0.875	235809	329.405	4039705	0.47	3583	62	555384	None
ERR13299675	100	0.03	Neural Network (Specific Model)	11	0.876	235809	330.158	4031653	0.47	3569	59	593995	None
ERR13299676	100	0.03	Neural Network (Specific Model)	11	0.876	235809	330.018	4031043	0.47	3570	57	593875	None
ERR13299677	100	0.02	Neural Network (Specific Model)	11	0.876	235769	329.441	4034186	0.47	3581	63	590201	None
ERR13299679	100	0.02	Neural Network (Specific Model)	11	0.876	235769	329.787	4032911	0.47	3576	61	627445	None
ERR13299680	100	0.02	Neural Network (Specific Model)	11	0.876	235769	330.326	4028742	0.47	3566	59	590918	None
ERR13299682	100	0.02	Neural Network (Specific Model)	11	0.876	235769	329.637	4033637	0.47	3577	62	590201	None
ERR13299683	100	0.02	Neural Network (Specific Model)	11	0.876	231490	329.464	4034295	0.47	3580	63	555326	None
ERR13299685	100	0.02	Neural Network (Specific Model)	11	0.876	231490	329.732	4033033	0.47	3576	62	555326	None
ERR13299686	100	0.02	Neural Network (Specific Model)	11	0.876	235769	329.93	4033468	0.47	3574	61	590849	None
ERR13299688	100	0.02	Neural Network (Specific Model)	11	0.876	235769	329.831	4033881	0.47	3576	60	596615	None
ERR13299697	100	0.02	Neural Network (Specific Model)	11	0.877	235769	330.211	4029455	0.47	3570	59	593733	None
ERR13299698	100	0.03	Neural Network (Specific Model)	11	0.875	235809	329.542	4038872	0.47	3581	62	591179	None
ERR13299699	100	0.02	Neural Network (Specific Model)	11	0.876	231490	329.545	4032132	0.47	3577	66	523313	None
ERR13299700	100	0.02	Neural Network (Specific Model)	11	0.876	235769	329.808	4032311	0.47	3575	60	590749	None
ERR13299701	100	0.02	Neural Network (Specific Model)	11	0.876	246679	329.869	4028060	0.47	3572	62	595250	None
ERR13299703	100	0.02	Neural Network (Specific Model)	11	0.876	198915	329.644	4030749	0.47	3575	65	555326	None
ERR13299704	100	0.02	Neural Network (Specific Model)	11	0.876	246680	329.646	4029791	0.47	3575	61	595318	None
ERR13299705	100	0.02	Neural Network (Specific Model)	11	0.876	246678	329.333	4029650	0.47	3579	61	555326	None
ERR13299708	100	0.02	Neural Network (Specific Model)	11	0.877	247150	329.96	4024384	0.47	3569	63	595154	None
ERR13299709	100	0.02	Neural Network (Specific Model)	11	0.876	235769	329.423	4030311	0.47	3578	65	555326	None
ERR13299710	100	0.02	Neural Network (Specific Model)	11	0.876	247150	329.846	4029538	0.47	3573	63	595158	None
ERR13299711	100	0.02	Neural Network (Specific Model)	11	0.876	247058	329.975	4030895	0.47	3572	62	595249	None
ERR13299712	100	0.02	Neural Network (Specific Model)	11	0.876	235769	329.533	4028841	0.47	3576	66	555326	None
ERR13299713	100	0.03	Neural Network (Specific Model)	11	0.876	247018	329.626	4034600	0.47	3577	59	632554	None
ERR13299714	100	0.02	Neural Network (Specific Model)	11	0.876	247150	329.641	4029686	0.47	3575	61	595149	None
ERR13299715	100	0.02	Neural Network (Specific Model)	11	0.876	247060	329.832	4028680	0.47	3572	63	595149	None
ERR13299716	100	0.02	Neural Network (Specific Model)	11	0.876	247062	329.699	4029135	0.47	3574	64	595150	None
ERR13299722	100	0.02	Neural Network (Specific Model)	11	0.876	246511	329.609	4032314	0.47	3577	61	595149	None
ERR13299723	100	0.02	Neural Network (Specific Model)	11	0.876	247150	329.506	4028208	0.47	3576	63	595148	None
ERR13299724	100	0.02	Neural Network (Specific Model)	11	0.876	246511	329.454	4031224	0.47	3578	61	595149	None
ERR13299725	100	0.02	Neural Network (Specific Model)	11	0.876	247150	329.458	4031232	0.47	3578	62	595149	None
ERR13299726	100	0.03	Neural Network (Specific Model)	11	0.876	299334	329.711	4031499	0.47	3574	58	555384	None
ERR13299727	100	0.03	Neural Network (Specific Model)	11	0.876	247058	329.889	4019643	0.47	3564	60	595157	None
ERR13299729	100	0.02	Neural Network (Specific Model)	11	0.876	235775	329.292	4036742	0.47	3584	64	590301	None
ERR13299730	100	0.02	Neural Network (Specific Model)	11	0.876	235753	329.591	4034304	0.47	3579	63	592512	None
ERR13299731	100	0.03	Neural Network (Specific Model)	11	0.875	350768	329.595	4041231	0.47	3582	57	627711	None
ERR13299732	100	0.02	Neural Network (Specific Model)	11	0.876	247150	329.942	4026699	0.47	3570	63	595140	None
ERR13299733	100	0.02	Neural Network (Specific Model)	11	0.876	235769	329.664	4032853	0.47	3577	64	590194	None
ERR13299734	100	0.03	Neural Network (Specific Model)	11	0.876	235809	329.302	4040430	0.47	3585	58	555384	None
ERR13299735	100	0.03	Neural Network (Specific Model)	11	0.875	235809	329.528	4042009	0.47	3583	66	627711	None
ERR13299738	100	0.02	Neural Network (Specific Model)	11	0.876	231490	329.537	4034930	0.47	3580	62	592503	None
ERR13299739	100	0.02	Neural Network (Specific Model)	11	0.876	235769	329.985	4033309	0.47	3574	62	590918	None
ERR13299740	100	0.02	Neural Network (Specific Model)	11	0.876	247058	329.967	4028343	0.47	3571	58	595140	None
ERR13299741	100	0.02	Neural Network (Specific Model)	11	0.876	235767	329.695	4028039	0.47	3573	61	555326	None
ERR13299743	100	0.03	Neural Network (Specific Model)	11	0.875	235809	329.582	4040599	0.47	3581	65	590736	None
ERR13299744	100	0.03	Neural Network (Specific Model)	11	0.875	235814	329.286	4041533	0.47	3586	65	590736	None
ERR14364278	100	0.03	Neural Network (Specific Model)	11	0.876	247027	330.022	4016908	0.47	3559	62	801118	None
ERR14364279	100	0.03	Neural Network (Specific Model)	11	0.876	215862	329.264	4014795	0.47	3566	70	566229	None
ERR14364280	100	0.03	Neural Network (Specific Model)	11	0.876	172391	329.155	4017392	0.47	3568	69	595673	None
ERR14364281	100	0.03	Neural Network (Specific Model)	11	0.876	246717	329.246	4016508	0.47	3567	61	632648	None
ERR14364282	100	0.03	Neural Network (Specific Model)	11	0.876	235809	329.276	4017224	0.47	3567	67	561291	None
ERR14364283	100	0.03	Neural Network (Specific Model)	11	0.876	226810	329.408	4018371	0.47	3567	62	561300	None
ERR14364284	100	0.04	Neural Network (Specific Model)	11	0.876	198662	329.455	4016207	0.47	3565	56	632648	None
ERR14364285	100	0.03	Neural Network (Specific Model)	11	0.876	235809	329.711	4018796	0.47	3564	55	632648	None
ERR14364286	100	0.03	Neural Network (Specific Model)	11	0.876	208491	329.319	4014930	0.47	3565	65	424244	None
ERR14364287	100	0.03	Neural Network (Specific Model)	11	0.876	235809	329.48	4016521	0.47	3564	61	555290	None
ERR14364288	100	0.03	Neural Network (Specific Model)	11	0.876	299335	329.342	4015682	0.47	3565	62	774414	None
ERR14364289	100	0.03	Neural Network (Specific Model)	11	0.876	235809	329.387	4015697	0.47	3565	62	632647	None
ERR14364290	100	0.03	Neural Network (Specific Model)	11	0.876	299335	329.469	4017616	0.47	3566	59	555242	None
ERR14364291	100	0.03	Neural Network (Specific Model)	11	0.876	247189	329.725	4016686	0.47	3562	62	632648	None
ERR14364292	100	0.03	Neural Network (Specific Model)	11	0.876	299335	329.676	4018295	0.47	3564	54	561281	None
ERR14364293	100	0.03	Neural Network (Specific Model)	11	0.876	235809	329.655	4016128	0.47	3562	62	632646	None
ERR14364294	100	0.03	Neural Network (Specific Model)	11	0.876	235809	329.59	4017666	0.47	3564	59	555242	None
ERR14364295	100	0.03	Neural Network (Specific Model)	11	0.876	247189	329.377	4016772	0.47	3566	61	555211	None
ERR14364296	100	0.03	Neural Network (Specific Model)	11	0.876	231033	329.412	4017877	0.47	3567	60	502120	None
ERR14364297	100	0.03	Neural Network (Specific Model)	11	0.876	227862	329.539	4018010	0.47	3565	57	555212	None
ERR14364298	100	0.03	Neural Network (Specific Model)	11	0.876	235809	329.709	4017697	0.47	3563	62	632647	None
ERR14364299	100	0.03	Neural Network (Specific Model)	11	0.876	246388	328.951	4008073	0.48	3562	61	555242	None
ERR14364300	100	0.03	Neural Network (Specific Model)	11	0.876	246550	329.814	4006164	0.47	3551	59	555212	None
ERR14364301	100	0.02	Neural Network (Specific Model)	11	0.876	247189	329.525	4015365	0.47	3563	60	555266	None
ERR14364302	100	0.03	Neural Network (Specific Model)	11	0.876	235809	329.582	4017168	0.47	3564	62	555272	None
ERR14364303	100	0.03	Neural Network (Specific Model)	11	0.876	235809	329.573	4017959	0.47	3564	62	632647	None
ERR14364304	100	0.03	Neural Network (Specific Model)	11	0.876	299335	329.504	4020665	0.47	3567	59	632647	None
ERR14364305	100	0.03	Neural Network (Specific Model)	11	0.876	299335	329.735	4018698	0.47	3563	56	801117	None
ERR14364306	100	0.03	Neural Network (Specific Model)	11	0.876	246550	330.164	4017121	0.47	3558	54	632648	None
ERR14364307	100	0.09	Neural Network (Specific Model)	11	0.876	247025	329.629	4018095	0.47	3564	59	800882	None
ERR14364308	100	0.03	Neural Network (Specific Model)	11	0.876	299335	329.867	4017620	0.47	3561	59	786722	None
ERR14364309	100	0.03	Neural Network (Specific Model)	11	0.876	246551	329.071	4017685	0.47	3570	60	632648	None
ERR14364310	100	0.03	Neural Network (Specific Model)	11	0.876	299324	329.362	4017432	0.47	3567	57	801117	None
ERR14364311	100	0.03	Neural Network (Specific Model)	11	0.876	247027	329.773	4017236	0.47	3562	61	595673	None
ERR14364312	100	0.03	Neural Network (Specific Model)	11	0.876	299335	329.941	4017134	0.47	3560	57	801119	None
ERR14364313	100	0.03	Neural Network (Specific Model)	11	0.876	247189	329.165	4016511	0.47	3568	62	632648	None
ERR14364314	100	0.03	Neural Network (Specific Model)	11	0.876	247077	329.646	4014504	0.47	3561	60	555236	None
ERR14364315	100	0.03	Neural Network (Specific Model)	11	0.876	299335	329.304	4016438	0.47	3567	58	801119	None
ERR14364316	100	0.03	Neural Network (Specific Model)	11	0.876	247078	329.54	4016549	0.47	3564	61	502120	None
ERR14364317	100	0.03	Neural Network (Specific Model)	11	0.876	247077	329.482	4015356	0.47	3563	64	595672	None
ERR14364318	100	0.03	Neural Network (Specific Model)	11	0.876	247189	329.56	4016837	0.47	3564	55	632648	None
ERR14364319	100	0.03	Neural Network (Specific Model)	11	0.876	235809	329.675	4016598	0.47	3562	60	555176	None
ERR14364320	100	0.03	Neural Network (Specific Model)	11	0.876	247027	329.802	4017592	0.47	3562	56	801119	None
ERR14364321	100	0.03	Neural Network (Specific Model)	11	0.876	246548	329.354	4019165	0.47	3568	59	632648	None
ERR14364322	100	0.03	Neural Network (Specific Model)	11	0.876	246551	329.728	4019355	0.47	3564	59	608161	None
ERR14364323	100	0.03	Neural Network (Specific Model)	11	0.876	246388	329.604	4017596	0.47	3564	58	555175	None
ERR14364324	100	0.03	Neural Network (Specific Model)	11	0.876	246550	329.796	4018099	0.47	3562	60	555176	None
ERR14364325	100	0.03	Neural Network (Specific Model)	11	0.876	299335	329.705	4018358	0.47	3564	56	801088	None
ERR14364326	100	0.03	Neural Network (Specific Model)	11	0.876	235809	329.804	4018291	0.47	3563	59	555224	None
ERR14364327	100	0.03	Neural Network (Specific Model)	11	0.876	246551	329.292	4016322	0.47	3566	64	555284	None
ERR14364328	100	0.03	Neural Network (Specific Model)	11	0.876	247189	329.146	4015913	0.47	3568	58	570125	None
ERR14364329	100	0.03	Neural Network (Specific Model)	11	0.876	299335	329.211	4016495	0.47	3568	52	632648	None
ERR14364330	100	0.03	Neural Network (Specific Model)	11	0.876	235809	329.295	4014208	0.47	3565	59	632647	None
ERR14364331	100	0.03	Neural Network (Specific Model)	11	0.876	235808	329.761	4017834	0.47	3562	52	637977	None
ERR14364332	100	0.03	Neural Network (Specific Model)	11	0.876	246717	329.279	4016469	0.47	3567	65	555236	None
ERR14364333	100	0.03	Neural Network (Specific Model)	11	0.876	246551	329.567	4016295	0.47	3563	65	632647	None
ERR14364334	100	0.03	Neural Network (Specific Model)	11	0.876	247189	329.379	4015855	0.47	3565	63	555176	None
ERR14364335	100	0.03	Neural Network (Specific Model)	11	0.876	247077	329.892	4014445	0.47	3559	55	632632	None
ERR14364336	100	0.03	Neural Network (Specific Model)	11	0.876	247077	329.794	4014936	0.47	3560	58	632632	None
ERR14364337	100	0.03	Neural Network (Specific Model)	11	0.876	247077	329.429	4015007	0.47	3564	60	632632	None
ERR14364338	100	0.03	Neural Network (Specific Model)	11	0.876	247077	329.743	4015371	0.47	3561	58	556543	None
ERR14364339	100	0.04	Neural Network (Specific Model)	11	0.876	235809	329.736	4014990	0.47	3561	58	555290	None
ERR14364340	100	0.04	Neural Network (Specific Model)	11	0.876	247077	329.714	4015441	0.47	3561	62	555290	None
ERR14364341	100	0.03	Neural Network (Specific Model)	11	0.876	247077	329.623	4014921	0.47	3562	57	555499	None
ERR14364342	100	0.03	Neural Network (Specific Model)	11	0.876	247077	329.709	4015003	0.47	3561	59	555290	None
ERR14364343	100	0.03	Neural Network (Specific Model)	11	0.876	247077	329.855	4014847	0.47	3559	58	632632	None
ERR14364344	100	0.03	Neural Network (Specific Model)	11	0.876	247077	329.66	4014517	0.47	3561	58	632648	None
ERR14364345	100	0.03	Neural Network (Specific Model)	11	0.876	247077	329.639	4013976	0.47	3561	58	632648	None
ERR14364346	100	0.03	Neural Network (Specific Model)	11	0.876	235806	329.729	4014437	0.47	3560	59	555236	None
ERR14364347	100	0.03	Neural Network (Specific Model)	11	0.876	235809	329.736	3965339	0.47	3514	66	555224	None
ERR14364348	100	0.03	Neural Network (Specific Model)	11	0.876	247077	329.82	4015133	0.47	3559	60	596772	None
ERR14364349	100	0.03	Neural Network (Specific Model)	11	0.876	221078	329.558	4014224	0.47	3562	62	514864	None
ERR14364350	100	0.03	Neural Network (Specific Model)	11	0.876	247189	329.606	4014802	0.47	3562	60	632528	None
ERR14364351	100	0.03	Neural Network (Specific Model)	11	0.876	247089	329.872	4014311	0.47	3559	60	555290	None
ERR14364352	100	0.03	Neural Network (Specific Model)	11	0.876	247077	329.927	4014207	0.47	3558	60	595673	None
ERR14364353	100	0.03	Neural Network (Specific Model)	11	0.876	235797	329.922	4014713	0.47	3558	62	632648	None
ERR14364354	100	0.03	Neural Network (Specific Model)	11	0.876	247073	329.422	4014228	0.47	3564	63	555284	None
ERR14364355	100	0.04	Neural Network (Specific Model)	11	0.876	247078	329.579	4014119	0.47	3562	60	598578	None
ERR14364356	100	0.03	Neural Network (Specific Model)	11	0.876	247077	329.745	4013479	0.47	3560	57	632648	None
ERR14364357	100	0.03	Neural Network (Specific Model)	11	0.876	247188	329.091	4015281	0.47	3568	61	632647	None
ERR14364358	100	0.37	Neural Network (Specific Model)	11	0.876	235796	329.403	4013719	0.47	3563	58	555283	None
ERR14364359	100	0.03	Neural Network (Specific Model)	11	0.876	235797	329.718	4013965	0.47	3560	62	629612	None
ERR14364360	100	0.03	Neural Network (Specific Model)	11	0.876	247077	329.746	4014270	0.47	3560	57	632648	None
ERR14364361	100	0.03	Neural Network (Specific Model)	11	0.876	246551	329.627	4014386	0.47	3562	63	555284	None
ERR14364362	100	0.03	Neural Network (Specific Model)	11	0.876	246718	329.627	4014619	0.47	3562	63	632529	None
ERR14364363	100	0.57	Neural Network (Specific Model)	11	0.876	235831	329.459	4008680	0.47	3558	61	555283	None
ERR14364364	100	0.06	Neural Network (Specific Model)	11	0.876	247189	329.571	4014370	0.47	3562	61	555284	None
ERR14364365	100	0.03	Neural Network (Specific Model)	11	0.876	247077	329.569	4014136	0.47	3562	59	555284	None
ERR14364366	100	0.16	Neural Network (Specific Model)	11	0.877	299335	330.847	4052203	0.47	3585	59	671391	None
ERR14364367	100	0.04	Neural Network (Specific Model)	11	0.876	247189	329.376	4014694	0.47	3565	61	555284	None
ERR14364368	100	0.03	Neural Network (Specific Model)	11	0.876	247077	329.821	4014740	0.47	3560	58	632528	None
ERR14364369	100	0.03	Neural Network (Specific Model)	11	0.876	247077	329.443	4015901	0.47	3564	67	555284	None
ERR14364370	100	0.03	Neural Network (Specific Model)	11	0.876	235797	329.352	4014893	0.47	3565	62	555285	None
ERR14364371	100	0.05	Neural Network (Specific Model)	11	0.876	212485	329.296	4015480	0.47	3566	65	555284	None
ERR14364372	100	0.03	Neural Network (Specific Model)	11	0.876	247076	329.665	4014539	0.47	3562	61	599247	None
ERR14364373	100	0.03	Neural Network (Specific Model)	11	0.876	247077	329.556	4015082	0.47	3563	61	555284	None
ERR14364374	100	0.03	Neural Network (Specific Model)	11	0.876	247077	329.627	4013721	0.47	3561	57	632649	None
ERR14364375	100	0.03	Neural Network (Specific Model)	11	0.876	235797	329.522	4013665	0.47	3563	62	555284	None
ERR14364376	100	0.03	Neural Network (Specific Model)	11	0.876	235797	329.436	4015097	0.47	3564	64	555284	None
ERR14364377	100	0.03	Neural Network (Specific Model)	11	0.876	247199	329.51	4014967	0.47	3563	61	595678	None
ERR14364378	100	0.03	Neural Network (Specific Model)	11	0.876	247077	329.967	4014186	0.47	3558	57	635087	None
ERR14364379	100	0.03	Neural Network (Specific Model)	11	0.876	235797	328.84	4014270	0.47	3570	67	555280	None
ERR14364380	100	0.03	Neural Network (Specific Model)	11	0.876	247077	329.75	4013706	0.47	3560	56	635075	None
ERR14364381	100	0.03	Neural Network (Specific Model)	11	0.876	247077	329.285	4010949	0.47	3562	60	555268	None
ERR14364382	100	0.03	Neural Network (Specific Model)	11	0.876	247077	329.616	4014569	0.47	3562	63	597100	None
ERR14364383	100	0.03	Neural Network (Specific Model)	11	0.876	235797	329.406	4014445	0.47	3564	62	555284	None
ERR14364384	100	0.03	Neural Network (Specific Model)	11	0.876	235797	329.4	4014618	0.47	3564	68	555284	None
ERR14364385	100	0.03	Neural Network (Specific Model)	11	0.876	235825	329.542	4014589	0.47	3563	60	635087	None
ERR14364386	100	0.03	Neural Network (Specific Model)	11	0.876	247077	329.754	4013846	0.47	3560	58	555224	None
ERR14364387	100	0.03	Neural Network (Specific Model)	11	0.876	247077	329.684	4013465	0.47	3560	57	632648	None
ERR14364388	100	0.03	Neural Network (Specific Model)	11	0.876	228681	329.724	4015407	0.47	3561	63	555296	None
ERR14364389	100	0.03	Neural Network (Specific Model)	11	0.876	247077	329.687	4016211	0.47	3562	60	599776	None
ERR14364390	100	0.03	Neural Network (Specific Model)	11	0.876	247077	329.828	4015172	0.47	3560	56	632632	None
ERR14364391	100	0.03	Neural Network (Specific Model)	11	0.876	247077	329.585	4015620	0.47	3563	61	555230	None
ERR14364392	100	0.02	Neural Network (Specific Model)	11	0.876	247077	329.654	4015919	0.47	3562	63	597641	None
ERR14364393	100	0.03	Neural Network (Specific Model)	11	0.876	247077	329.675	4015183	0.47	3562	59	589822	None
ERR14364394	100	0.03	Neural Network (Specific Model)	11	0.876	247077	329.326	4014976	0.47	3565	62	555296	None
ERR14364395	100	0.07	Neural Network (Specific Model)	11	0.876	247043	329.79	4014402	0.47	3560	57	555296	None
ERR14364396	100	0.03	Neural Network (Specific Model)	11	0.876	247077	329.713	4014283	0.47	3561	60	592376	None
ERR14364397	100	0.03	Neural Network (Specific Model)	11	0.876	235809	329.824	4015692	0.47	3560	64	590689	None
ERR14364398	100	0.03	Neural Network (Specific Model)	11	0.876	247077	329.806	4015169	0.47	3560	58	555296	None
ERR14364399	100	0.03	Neural Network (Specific Model)	11	0.876	246715	329.34	4015517	0.47	3566	63	555290	None
ERR14364400	100	0.03	Neural Network (Specific Model)	11	0.876	247077	329.582	4015632	0.47	3563	62	555236	None
ERR14364401	100	0.03	Neural Network (Specific Model)	11	0.876	247077	329.562	4014929	0.47	3563	58	555296	None
ERR14364402	100	0.03	Neural Network (Specific Model)	11	0.876	299346	329.552	4014541	0.47	3563	59	765022	None
ERR14364403	100	0.03	Neural Network (Specific Model)	11	0.876	235809	329.435	4015250	0.47	3564	60	555290	None
ERR14364404	100	0.04	Neural Network (Specific Model)	11	0.876	247077	329.809	4015049	0.47	3560	58	555296	None
ERR14364405	100	0.03	Neural Network (Specific Model)	11	0.876	246718	329.67	4013866	0.47	3561	58	595202	None
ERR14364406	100	0.03	Neural Network (Specific Model)	11	0.876	247077	329.613	4014976	0.47	3562	56	632632	None
ERR14364407	100	0.03	Neural Network (Specific Model)	11	0.876	247077	329.787	4014548	0.47	3560	57	595537	None
ERR14364408	100	0.03	Neural Network (Specific Model)	11	0.876	247077	329.628	4014962	0.47	3562	59	632632	None
ERR14364409	100	0.03	Neural Network (Specific Model)	11	0.876	235797	329.604	4014600	0.47	3562	62	555284	None
ERR14364410	100	0.03	Neural Network (Specific Model)	11	0.876	247077	329.632	4015811	0.47	3562	61	555290	None
ERR14364411	100	0.03	Neural Network (Specific Model)	11	0.876	247077	329.953	4015075	0.47	3558	58	632632	None
ERR14364412	100	0.03	Neural Network (Specific Model)	11	0.876	247077	329.455	4016005	0.47	3564	60	562783	None
ERR14364413	100	0.03	Neural Network (Specific Model)	11	0.876	227791	329.691	4015326	0.47	3561	61	555288	None
ERR14364414	100	0.03	Neural Network (Specific Model)	11	0.876	247077	329.657	4016306	0.47	3562	64	604839	None
ERR14364415	100	0.03	Neural Network (Specific Model)	11	0.876	247077	329.413	4010224	0.47	3560	59	632633	None
ERR14364416	100	0.03	Neural Network (Specific Model)	11	0.876	247077	329.691	4015558	0.47	3561	59	555290	None
ERR14364417	100	0.03	Neural Network (Specific Model)	11	0.876	235809	329.618	4015836	0.47	3562	62	632512	None
ERR14364418	100	0.03	Neural Network (Specific Model)	11	0.876	350639	329.82	4014886	0.47	3560	57	632648	None
ERR14364419	100	0.03	Neural Network (Specific Model)	11	0.876	246718	329.669	4015240	0.47	3562	57	632632	None
ERR14364420	100	0.03	Neural Network (Specific Model)	11	0.876	299343	329.652	4016643	0.47	3563	59	730083	None
ERR14364421	100	0.03	Neural Network (Specific Model)	11	0.876	247155	329.661	4015944	0.47	3562	60	555296	None
ERR14364422	100	0.03	Neural Network (Specific Model)	11	0.876	235809	329.555	4015566	0.47	3563	61	555290	None
ERR14364423	100	0.03	Neural Network (Specific Model)	11	0.876	247077	330.04	4014851	0.47	3557	56	595673	None
ERR14364424	100	0.03	Neural Network (Specific Model)	11	0.876	247077	329.851	4014557	0.47	3559	57	632648	None
ERR14364425	100	0.03	Neural Network (Specific Model)	11	0.876	247077	329.68	4014557	0.47	3561	57	632648	None
ERR14364426	100	0.03	Neural Network (Specific Model)	11	0.876	235843	329.57	4014302	0.47	3562	60	595277	None
ERR14364427	100	0.03	Neural Network (Specific Model)	11	0.876	247077	329.753	4014605	0.47	3560	59	595673	None
ERR14364428	100	0.03	Neural Network (Specific Model)	11	0.876	247077	329.762	4014831	0.47	3560	58	632648	None
ERR14364429	100	0.03	Neural Network (Specific Model)	11	0.876	246718	329.738	4015153	0.47	3561	60	595673	None
ERR14364430	100	0.03	Neural Network (Specific Model)	11	0.876	247077	329.781	4015105	0.47	3560	59	595673	None
ERR14364431	100	0.03	Neural Network (Specific Model)	11	0.876	247077	329.892	4014242	0.47	3558	54	632632	None
ERR14364432	100	0.03	Neural Network (Specific Model)	11	0.876	246718	329.361	4014536	0.47	3565	60	555290	None
ERR14364433	100	0.03	Neural Network (Specific Model)	11	0.876	247077	329.724	4015346	0.47	3561	59	559224	None
ERR14364434	100	0.03	Neural Network (Specific Model)	11	0.876	247077	329.708	4014454	0.47	3561	59	555290	None
ERR14364435	100	0.03	Neural Network (Specific Model)	11	0.876	247077	329.855	4014495	0.47	3559	55	632632	None
ERR14364436	100	0.03	Neural Network (Specific Model)	11	0.876	247077	329.826	4014997	0.47	3560	58	632632	None
ERR14364437	100	0.03	Neural Network (Specific Model)	11	0.876	247189	329.635	4014530	0.47	3562	59	597260	None
ERR14364438	100	0.16	Neural Network (Specific Model)	11	0.877	247077	330.65	4055217	0.47	3589	63	555290	None
ERR14364439	100	0.03	Neural Network (Specific Model)	11	0.876	247077	329.86	4014488	0.47	3559	55	632632	None
ERR14364440	100	0.03	Neural Network (Specific Model)	11	0.876	235809	328.866	4008930	0.47	3565	64	626921	None
ERR14364441	100	0.03	Neural Network (Specific Model)	11	0.876	199815	329.264	4014503	0.47	3565	66	555236	None
ERR14364442	100	0.03	Neural Network (Specific Model)	11	0.876	235809	329.697	4017425	0.47	3563	65	501465	None
ERR14364443	100	0.03	Neural Network (Specific Model)	11	0.876	247077	329.75	4017087	0.47	3562	59	555218	None
ERR14364444	100	0.03	Neural Network (Specific Model)	11	0.876	247189	329.679	4017293	0.47	3563	57	560092	None
ERR14364445	100	0.03	Neural Network (Specific Model)	11	0.876	235809	329.606	4017572	0.47	3564	63	586219	None
ERR14364446	100	0.04	Neural Network (Specific Model)	11	0.876	235809	329.571	4017983	0.47	3565	61	598164	None
ERR14364447	100	0.03	Neural Network (Specific Model)	11	0.876	205671	329.776	4017323	0.47	3562	62	466708	None
ERR14364448	100	0.03	Neural Network (Specific Model)	11	0.876	235809	329.623	4018090	0.47	3564	62	501465	None
ERR14364449	100	0.03	Neural Network (Specific Model)	11	0.876	235809	329.487	4017819	0.47	3566	62	592099	None
ERR14364450	100	0.03	Neural Network (Specific Model)	11	0.876	235809	329.528	4018644	0.47	3566	58	596636	None
ERR14364451	100	0.03	Neural Network (Specific Model)	11	0.876	236379	329.507	4020057	0.47	3568	57	555242	None
ERR14364452	100	0.03	Neural Network (Specific Model)	11	0.876	235809	329.742	4017563	0.47	3563	59	555242	None
ERR14364453	100	0.04	Neural Network (Specific Model)	11	0.876	299335	329.856	4018406	0.47	3562	52	555218	None
ERR14364454	100	0.03	Neural Network (Specific Model)	11	0.876	245103	329.629	4017096	0.47	3564	58	555242	None
ERR14364455	100	0.03	Neural Network (Specific Model)	11	0.876	295711	329.44	4017352	0.47	3566	64	555217	None
ERR14364456	100	0.03	Neural Network (Specific Model)	11	0.876	198659	328.838	4018604	0.47	3574	70	465086	None
ERR14364457	100	0.04	Neural Network (Specific Model)	11	0.876	198662	329.115	4015772	0.47	3568	65	501465	None
ERR14364458	100	0.03	Neural Network (Specific Model)	11	0.876	235809	329.716	4017121	0.47	3563	59	555218	None
ERR14364459	100	0.04	Neural Network (Specific Model)	11	0.876	247189	329.091	4020051	0.47	3570	62	555217	None
ERR14364460	100	0.03	Neural Network (Specific Model)	11	0.876	198662	329.578	4016341	0.47	3564	60	555534	None
ERR14364461	100	0.03	Neural Network (Specific Model)	11	0.876	198662	329.574	4017862	0.47	3565	64	487595	None
ERR14364462	100	0.03	Neural Network (Specific Model)	11	0.876	235809	329.648	4018243	0.47	3564	61	555288	None
ERR14364463	100	0.03	Neural Network (Specific Model)	11	0.876	235809	329.443	4016463	0.47	3565	61	555242	None
ERR14364464	100	0.03	Neural Network (Specific Model)	11	0.876	235809	329.796	4016932	0.47	3562	60	555242	None
ERR14364465	100	0.03	Neural Network (Specific Model)	11	0.876	247189	329.854	4017357	0.47	3561	55	595277	None
ERR14364466	100	0.03	Neural Network (Specific Model)	11	0.876	235809	329.253	4017124	0.47	3567	66	555302	None
ERR14364467	100	0.03	Neural Network (Specific Model)	11	0.876	198662	329.353	4016816	0.47	3566	64	447966	None
ERR14364468	100	0.03	Neural Network (Specific Model)	11	0.876	246551	329.602	4017329	0.47	3564	62	555278	None
ERR14364469	100	0.03	Neural Network (Specific Model)	11	0.876	235809	328.852	4017069	0.47	3572	65	561288	None
ERR14364470	100	0.03	Neural Network (Specific Model)	11	0.876	246551	329.66	4017383	0.47	3564	58	569997	None
ERR14364471	100	0.54	Neural Network (Specific Model)	11	0.876	168131	328.935	4015349	0.47	3570	62	555740	None
ERR14364472	100	0.03	Neural Network (Specific Model)	11	0.876	235809	329.683	4017434	0.47	3563	58	624744	None
ERR14364473	100	0.03	Neural Network (Specific Model)	11	0.876	246555	329.865	4016723	0.47	3561	58	555224	None
ERR14364474	100	0.03	Neural Network (Specific Model)	11	0.876	235537	329.513	4016345	0.47	3565	63	561294	None
ERR14364475	100	0.03	Neural Network (Specific Model)	11	0.876	235797	329.665	4017318	0.47	3564	64	555224	None
ERR14364476	100	0.03	Neural Network (Specific Model)	11	0.876	235809	329.834	4014087	0.47	3559	63	522632	None
ERR14364477	100	0.03	Neural Network (Specific Model)	11	0.876	235809	329.991	4017594	0.47	3560	52	634917	None
ERR14364478	100	0.03	Neural Network (Specific Model)	11	0.876	246718	329.847	4017921	0.47	3562	49	635084	None
ERR14364479	100	0.03	Neural Network (Specific Model)	11	0.876	235809	329.502	4014653	0.47	3563	62	595550	None
ERR14364480	100	0.03	Neural Network (Specific Model)	11	0.876	299346	329.988	4019076	0.47	3561	50	801118	None
ERR14364481	100	0.03	Neural Network (Specific Model)	11	0.876	247190	330.142	4016633	0.47	3558	52	561312	None
ERR14364482	100	0.03	Neural Network (Specific Model)	11	0.876	235809	329.522	4015150	0.47	3564	64	510736	None
ERR14364483	100	0.03	Neural Network (Specific Model)	11	0.876	235809	329.707	4013647	0.47	3560	57	555302	None
ERR14364484	100	0.03	Neural Network (Specific Model)	11	0.876	299346	330.2	4018144	0.47	3558	56	680433	None
ERR14364485	100	0.03	Neural Network (Specific Model)	11	0.876	299346	330.171	4017186	0.47	3558	54	801117	None
ERR14364486	100	0.03	Neural Network (Specific Model)	11	0.876	246549	329.988	4018302	0.47	3561	48	635085	None
ERR14364487	100	0.03	Neural Network (Specific Model)	11	0.876	247028	329.841	4018154	0.47	3562	56	555302	None
ERR14364488	100	0.03	Neural Network (Specific Model)	11	0.876	247190	329.781	4019211	0.47	3563	54	555242	None
ERR14364489	100	0.03	Neural Network (Specific Model)	11	0.876	247189	329.773	4017094	0.47	3562	54	632632	None
ERR14364490	100	0.03	Neural Network (Specific Model)	11	0.876	235809	329.766	4018222	0.47	3562	59	555230	None
ERR14364491	100	0.03	Neural Network (Specific Model)	11	0.876	299346	330.179	4018922	0.47	3559	50	801119	None
ERR14364492	100	0.03	Neural Network (Specific Model)	11	0.876	247190	329.683	4015871	0.47	3562	53	632648	None
ERR14364493	100	0.03	Neural Network (Specific Model)	11	0.876	246718	329.589	4017470	0.47	3564	56	555302	None
ERR14364494	100	0.03	Neural Network (Specific Model)	11	0.876	247190	330.071	4017675	0.47	3559	53	632648	None
ERR14364495	100	0.03	Neural Network (Specific Model)	11	0.876	247189	329.683	4015524	0.47	3562	59	632632	None
ERR14364496	100	0.03	Neural Network (Specific Model)	11	0.876	247189	329.318	4016393	0.47	3566	64	555284	None
ERR14364497	100	0.03	Neural Network (Specific Model)	11	0.876	247189	329.583	4014875	0.47	3563	57	632632	None
ERR14364498	100	0.03	Neural Network (Specific Model)	11	0.876	246599	329.291	4014706	0.47	3566	60	555284	None
ERR14364499	100	0.03	Neural Network (Specific Model)	11	0.876	246599	329.425	4016225	0.47	3565	61	595537	None
ERR14364500	100	0.03	Neural Network (Specific Model)	11	0.876	247189	329.347	4015935	0.47	3566	57	591353	None
ERR14364501	100	0.03	Neural Network (Specific Model)	11	0.876	247077	329.653	4015475	0.47	3562	60	595537	None
ERR14364502	100	0.03	Neural Network (Specific Model)	11	0.876	235809	329.613	4014887	0.47	3562	58	555284	None
ERR14364503	100	0.03	Neural Network (Specific Model)	11	0.876	247077	329.469	4014721	0.47	3564	60	632632	None
ERR14364504	100	0.03	Neural Network (Specific Model)	11	0.876	247071	329.773	4015778	0.47	3560	60	555284	None
ERR14364505	100	0.03	Neural Network (Specific Model)	11	0.876	247189	329.547	4015322	0.47	3564	58	627544	None
ERR14364506	100	0.03	Neural Network (Specific Model)	11	0.876	247027	329.035	4015305	0.47	3569	63	578858	None
ERR14364507	100	0.03	Neural Network (Specific Model)	11	0.876	247151	329.322	4016207	0.47	3566	67	632648	None
ERR14882210	100	0.07	Neural Network (Specific Model)	11	0.873	247148	325.546	4038400	0.47	3615	80	666572	None
ERR16793724	100	0.16	Neural Network (Specific Model)	11	0.876	247197	325.012	4194070	0.48	3771	65	632431	None
ERR3980560	100	0.03	Neural Network (Specific Model)	11	0.875	198990	329.146	4040060	0.47	3584	72	525178	None
ERR9795982	100	0.03	Neural Network (Specific Model)	11	0.878	166089	328.45	4031500	0.48	3598	84	382409	None
ERR9808329	100	0.04	Neural Network (Specific Model)	11	0.879	198545	328.754	4053023	0.48	3615	73	555149	None
ERR9808330	100	0.03	Neural Network (Specific Model)	11	0.879	198841	329.276	4048465	0.48	3607	78	555210	None
ERR9808331	100	0.03	Neural Network (Specific Model)	11	0.878	167886	329.035	4053317	0.48	3612	73	555210	None
ERR9808332	100	0.04	Neural Network (Specific Model)	11	0.879	154992	328.873	4037327	0.47	3602	82	382522	None
ERR9808333	100	0.03	Neural Network (Specific Model)	11	0.879	198887	328.946	4053735	0.48	3614	71	555150	None
ERR9808334	100	0.04	Neural Network (Specific Model)	11	0.879	167888	328.802	4050680	0.48	3613	78	555150	None
ERR9808335	100	0.02	Neural Network (Specific Model)	11	0.879	172334	329.733	4048052	0.48	3602	79	555210	None
ERR9808336	100	0.03	Neural Network (Specific Model)	11	0.879	193997	329.167	4051914	0.48	3610	81	555210	None
ERR9808337	100	0.03	Neural Network (Specific Model)	11	0.879	167886	329.304	4049952	0.48	3608	79	555150	None
ERR9808338	100	0.03	Neural Network (Specific Model)	11	0.879	247022	329.442	4049372	0.48	3606	81	555150	None
ERR9808339	100	0.19	Neural Network (Specific Model)	11	0.879	152670	328.89	4038563	0.48	3601	81	382406	None
ERR9808340	100	0.03	Neural Network (Specific Model)	11	0.879	198871	328.688	4050969	0.48	3615	75	555210	None
ERR9808341	100	0.03	Neural Network (Specific Model)	11	0.879	198156	329.531	4051478	0.48	3606	74	555150	None
ERR9808342	100	0.04	Neural Network (Specific Model)	11	0.879	193912	328.706	4053136	0.48	3617	79	555211	None
ERR9808343	100	0.03	Neural Network (Specific Model)	11	0.878	167894	329.272	4030540	0.48	3589	67	392524	None
ERR9808344	100	0.03	Neural Network (Specific Model)	11	0.879	194068	331.172	3995225	0.47	3541	74	555142	None
ERR9808345	100	0.03	Neural Network (Specific Model)	11	0.879	190407	329.495	4052143	0.48	3607	72	555210	None
ERR9808346	100	0.02	Neural Network (Specific Model)	11	0.879	198834	331.281	4003138	0.48	3546	77	555202	None
ERR9808347	100	0.02	Neural Network (Specific Model)	11	0.879	194068	331.188	4005260	0.48	3548	75	555202	None
ERR9808348	100	0.02	Neural Network (Specific Model)	11	0.879	235693	331.245	4003526	0.48	3546	71	594932	None
ERR9808349	100	0.02	Neural Network (Specific Model)	11	0.879	134095	330.681	4003776	0.48	3552	86	555189	None
ERR9808350	100	0.02	Neural Network (Specific Model)	11	0.88	198546	330.984	4000202	0.48	3548	78	555203	None
ERR9808351	100	0.02	Neural Network (Specific Model)	11	0.879	198879	331.126	4002969	0.48	3548	79	392417	None
ERR9808352	100	0.03	Neural Network (Specific Model)	11	0.88	172334	330.719	4000175	0.48	3552	83	555066	None
ERR9808353	100	0.02	Neural Network (Specific Model)	11	0.879	235693	331.232	4001743	0.48	3546	72	555067	None
ERR9808354	100	0.02	Neural Network (Specific Model)	11	0.88	194067	330.887	4002572	0.48	3551	77	555127	None
ERR9808355	100	0.02	Neural Network (Specific Model)	11	0.879	198553	330.065	4003760	0.48	3560	75	555070	None
ERR9808356	100	0.02	Neural Network (Specific Model)	11	0.879	198546	331.033	4003274	0.48	3549	72	392420	None
ERR9808357	100	0.02	Neural Network (Specific Model)	11	0.88	154991	329.667	3992650	0.48	3556	90	555067	None
ERR9808358	100	0.02	Neural Network (Specific Model)	11	0.878	123149	332.435	3777560	0.48	3330	80	384390	None
ERR9808359	100	0.04	Neural Network (Specific Model)	11	0.877	211176	326.424	3964313	0.47	3556	84	571021	None
ERR9808360	100	0.02	Neural Network (Specific Model)	11	0.88	235693	330.795	3999435	0.48	3549	75	555067	None
ERR9808361	100	0.02	Neural Network (Specific Model)	11	0.88	235693	330.902	4001142	0.48	3550	78	555127	None
ERR9808362	100	0.02	Neural Network (Specific Model)	11	0.879	172346	330.688	4003375	0.48	3553	74	555066	None
ERR9808363	100	0.02	Neural Network (Specific Model)	11	0.88	246601	331.256	4001638	0.48	3546	78	555084	None
ERR9808364	100	0.02	Neural Network (Specific Model)	11	0.879	189544	330.674	4004023	0.48	3554	76	555067	None
ERR9808365	100	0.02	Neural Network (Specific Model)	11	0.88	235692	331.089	4002338	0.48	3549	74	555067	None
ERR9808366	100	0.02	Neural Network (Specific Model)	11	0.88	198842	331.504	4000968	0.48	3543	71	555067	None
ERR9808367	100	0.02	Neural Network (Specific Model)	11	0.879	189544	331.373	4002128	0.48	3544	79	555067	None
ERR9808368	100	0.02	Neural Network (Specific Model)	11	0.88	189544	331.093	3990702	0.47	3540	74	555067	None
ERR9808369	100	0.02	Neural Network (Specific Model)	11	0.879	235695	331.327	4003243	0.48	3546	73	555067	None
ERR9808370	100	0.02	Neural Network (Specific Model)	11	0.88	235693	330.823	4001758	0.48	3553	76	555067	None
ERR9808371	100	0.02	Neural Network (Specific Model)	11	0.88	172346	330.673	4000687	0.48	3552	79	386728	None
ERR9808372	100	0.04	Neural Network (Specific Model)	11	0.88	198546	330.274	4003112	0.48	3558	77	555070	None
ERR9808373	100	0.02	Neural Network (Specific Model)	11	0.88	235693	330.896	4002197	0.48	3551	75	555068	None
ERR9808374	100	0.02	Neural Network (Specific Model)	11	0.879	235708	330.082	3988987	0.48	3546	71	555064	None
ERR9808375	100	0.03	Neural Network (Specific Model)	11	0.879	189337	330.52	4005791	0.48	3556	70	447771	None
ERR9808376	100	0.02	Neural Network (Specific Model)	11	0.879	299172	331.841	3993583	0.48	3532	62	555067	None
ERR9808377	100	0.03	Neural Network (Specific Model)	11	0.879	189343	330.149	4004054	0.48	3559	72	555067	None
ERR9808378	100	0.02	Neural Network (Specific Model)	11	0.879	189544	331.163	4002308	0.48	3547	72	555067	None
ERR9808379	100	0.02	Neural Network (Specific Model)	11	0.879	189544	330.554	4002851	0.48	3554	75	555123	None
ERR9808380	100	0.02	Neural Network (Specific Model)	11	0.879	172346	330.439	4004333	0.48	3557	71	555067	None
ERR9808381	100	0.02	Neural Network (Specific Model)	11	0.88	198842	330.913	3998722	0.48	3547	76	392322	None
ERR9808382	100	0.02	Neural Network (Specific Model)	11	0.879	198842	330.644	4002799	0.48	3553	76	555067	None
ERR9808383	100	0.02	Neural Network (Specific Model)	11	0.879	189544	330.626	4004436	0.48	3555	70	555067	None
ERR9808384	100	0.02	Neural Network (Specific Model)	11	0.879	235693	329.331	3994263	0.47	3559	73	555064	None
ERR9808385	100	0.02	Neural Network (Specific Model)	11	0.879	194067	330.865	4003940	0.48	3552	72	555067	None
ERR9808386	100	0.02	Neural Network (Specific Model)	11	0.879	235689	330.126	4002504	0.48	3558	71	555067	None
ERR9808387	100	0.02	Neural Network (Specific Model)	11	0.879	194067	330.778	4004814	0.48	3553	77	555067	None
ERR9808388	100	0.02	Neural Network (Specific Model)	11	0.88	172346	330.916	4003053	0.48	3551	74	555068	None
ERR9808389	100	0.02	Neural Network (Specific Model)	11	0.879	197765	330.25	4004279	0.48	3559	69	555068	None
ERR9808390	100	0.03	Neural Network (Specific Model)	11	0.879	196610	330.239	3995156	0.47	3551	75	555067	None
ERR9808391	100	0.02	Neural Network (Specific Model)	11	0.879	189343	331.157	4003599	0.48	3548	78	555067	None
ERR9808392	100	0.02	Neural Network (Specific Model)	11	0.879	235694	331.008	4003474	0.48	3550	71	555067	None
ERR9808393	100	0.02	Neural Network (Specific Model)	11	0.879	189343	330.614	4003595	0.48	3553	76	555067	None
ERR9808394	100	0.02	Neural Network (Specific Model)	11	0.879	189544	330.576	4002791	0.48	3554	73	555070	None
ERR9808395	100	0.02	Neural Network (Specific Model)	11	0.879	167887	330.756	4003929	0.48	3552	72	392260	None
ERR9808396	100	0.08	Neural Network (Specific Model)	11	0.88	107174	329.892	3888216	0.48	3462	93	281688	None
ERR9808397	100	0.02	Neural Network (Specific Model)	11	0.879	235693	330.962	4004552	0.48	3551	70	555127	None
ERR9808398	100	0.02	Neural Network (Specific Model)	11	0.879	198545	329.96	4003649	0.48	3561	72	555127	None
ERR9808399	100	0.02	Neural Network (Specific Model)	11	0.879	198842	331.116	4004211	0.48	3549	72	555067	None
ERR9808400	100	0.02	Neural Network (Specific Model)	11	0.88	235696	331.03	4003222	0.48	3550	69	555067	None
ERR9808401	100	0.02	Neural Network (Specific Model)	11	0.879	235693	330.884	4003660	0.48	3551	70	555067	None
ERR9808402	100	0.02	Neural Network (Specific Model)	11	0.879	189343	330.982	4005142	0.48	3551	73	555068	None
ERR9808403	100	0.02	Neural Network (Specific Model)	11	0.88	235693	331.11	4002193	0.48	3548	72	555067	None
ERR9808404	100	0.02	Neural Network (Specific Model)	11	0.879	194067	330.613	4003833	0.48	3554	71	555067	None
ERR9808405	100	0.02	Neural Network (Specific Model)	11	0.879	189544	331.026	4004070	0.48	3549	74	555067	None
ERR9808406	100	0.02	Neural Network (Specific Model)	11	0.88	189544	331.187	4002779	0.48	3548	74	555067	None
ERR9808407	100	0.02	Neural Network (Specific Model)	11	0.879	198842	331.055	4003348	0.48	3549	72	555066	None
ERR9808408	100	0.02	Neural Network (Specific Model)	11	0.879	198842	330.486	4002867	0.48	3555	78	447801	None
ERR9808409	100	0.02	Neural Network (Specific Model)	11	0.879	235692	331.16	4002980	0.48	3548	68	555142	None
GCA_000167935.2	100	0.04	Neural Network (Specific Model)	11	0.858	345376	321.705	4045303	0.47	3599	59	1076557	None
GCA_000237505.2	100	0.03	Neural Network (Specific Model)	11	0.878	56303	324.721	4009493	0.47	3620	159	273346	None
GCA_000237645.2	100	0.01	Neural Network (Specific Model)	11	0.878	197656	330.349	4018022	0.47	3563	72	501901	None
GCA_000338075.1	100	0.58	Neural Network (Specific Model)	11	0.871	3141054	327.742	4202811	0.48	3728	2	3141054	None
GCA_001247835.1	100	0.01	Neural Network (Specific Model)	11	0.877	349590	329.068	4065829	0.47	3615	36	737568	None
GCA_001249515.1	99.22	0.08	Neural Network (Specific Model)	11	0.836	152268	318.961	4031393	0.48	3526	93	361574	None
GCA_001251435.1	100	0.01	Neural Network (Specific Model)	11	0.876	207543	329.59	4030860	0.47	3576	74	573168	None
GCA_001251935.1	100	0.1	Neural Network (Specific Model)	11	0.876	215658	329.623	4022708	0.47	3570	53	532772	None
GCA_001252775.1	100	0.01	Neural Network (Specific Model)	11	0.876	216498	330.156	4033005	0.47	3573	46	474480	None
GCA_001252875.1	97.67	0.14	Neural Network (Specific Model)	11	0.844	259594	320.724	3985453	0.47	3502	71	537036	None
GCA_001253035.1	100	0.01	Neural Network (Specific Model)	11	0.877	355055	329.293	4069009	0.47	3615	40	774321	None
GCA_001253155.1	99.89	0.12	Neural Network (Specific Model)	11	0.857	215825	322.937	3982016	0.47	3527	76	406198	None
GCA_001254335.1	100	0.01	Neural Network (Specific Model)	11	0.877	266665	330.717	4018257	0.47	3555	41	773528	None
GCA_001254675.1	100	0.01	Neural Network (Specific Model)	11	0.876	438064	327.142	4032311	0.47	3605	51	770697	None
GCA_001255915.1	100	0.01	Neural Network (Specific Model)	11	0.861	206741	326.13	4024204	0.48	3548	84	460342	None
GCA_001257835.1	100	0.02	Neural Network (Specific Model)	11	0.877	330000	330.581	4032637	0.47	3569	48	712512	None
GCA_001258535.1	99.06	0.07	Neural Network (Specific Model)	11	0.819	207410	316.166	4027393	0.48	3481	99	574043	None
GCA_001259475.1	100	0.01	Neural Network (Specific Model)	11	0.877	355052	330.047	4035607	0.47	3577	40	593257	None
GCA_001259635.1	99.99	0.49	Neural Network (Specific Model)	11	0.859	200144	318.208	3977514	0.47	3583	71	439647	None
GCA_001260295.1	100	0.01	Neural Network (Specific Model)	11	0.877	343743	329.246	4064557	0.47	3613	40	737550	None
GCA_001261555.1	100	0	Neural Network (Specific Model)	11	0.877	303239	330.611	4022982	0.47	3562	56	573462	None
GCA_001857545.1	100	0	Neural Network (Specific Model)	11	0.873	168370	318.662	3988138	0.48	3645	267	382439	None
GCA_001858455.1	100	0.03	Neural Network (Specific Model)	11	0.875	70861	322.482	4037271	0.47	3655	189	226602	None
GCA_001858465.1	100	0.06	Neural Network (Specific Model)	11	0.875	75342	323.384	4031968	0.47	3640	173	246278	None
GCA_001858475.1	100	0.01	Neural Network (Specific Model)	11	0.875	80103	325.615	4028526	0.48	3614	173	284896	None
GCA_001860285.1	100	0.02	Neural Network (Specific Model)	11	0.875	62356	322.963	4032975	0.47	3646	195	207378	None
GCA_001860295.1	100	0.36	Neural Network (Specific Model)	11	0.876	58112	322.522	4029303	0.47	3651	204	197580	None
GCA_001860365.1	100	0	Neural Network (Specific Model)	11	0.875	59275	323.412	4027803	0.47	3638	199	230728	None
GCA_001860385.1	100	0	Neural Network (Specific Model)	11	0.875	81376	325.076	4034667	0.47	3623	161	199630	None
GCA_001860425.1	100	0.1	Neural Network (Specific Model)	11	0.875	46404	320.023	4027621	0.48	3675	270	111165	None
GCA_001860465.1	100	0.01	Neural Network (Specific Model)	11	0.874	110905	325.481	4034135	0.47	3617	149	232240	None
GCA_001887615.1	100	0.37	Neural Network (Specific Model)	11	0.865	3008486	324.664	4076583	0.47	3625	2	3008486	None
GCA_002076155.1	100	0.01	Neural Network (Specific Model)	11	0.875	235742	329.441	4024114	0.47	3568	101	392695	None
GCA_002076165.1	100	0.01	Neural Network (Specific Model)	11	0.875	235742	329.617	4023827	0.47	3566	96	393388	None
GCA_002076175.1	100	0.01	Neural Network (Specific Model)	11	0.875	247562	329.008	4025207	0.47	3574	104	501192	None
GCA_002076185.1	100	0.01	Neural Network (Specific Model)	11	0.875	246617	329.416	4025935	0.47	3569	99	501194	None
GCA_002076235.1	100	0.01	Neural Network (Specific Model)	11	0.874	235741	329.026	4042340	0.47	3585	102	392689	None
GCA_002076245.1	100	0.01	Neural Network (Specific Model)	11	0.876	235742	329.945	4022009	0.47	3562	94	393050	None
GCA_002076255.1	100	0.01	Neural Network (Specific Model)	11	0.874	207095	328.524	4044276	0.47	3593	108	355176	None
GCA_002076265.1	100	0.01	Neural Network (Specific Model)	11	0.875	249242	329.753	4044593	0.47	3580	93	501192	None
GCA_002076315.1	100	0.01	Neural Network (Specific Model)	11	0.875	246617	329.998	4024390	0.47	3562	90	501115	None
GCA_002076415.1	100	0.01	Neural Network (Specific Model)	11	0.875	215352	329.247	4022767	0.47	3570	108	383042	None
GCA_002076425.1	100	0.01	Neural Network (Specific Model)	11	0.875	246617	329.521	4024350	0.47	3567	98	501192	None
GCA_002076455.1	100	0.01	Neural Network (Specific Model)	11	0.875	235742	329.518	4025417	0.47	3567	99	393050	None
GCA_002076465.1	100	0.01	Neural Network (Specific Model)	11	0.875	246617	329.14	4025781	0.47	3573	107	535888	None
GCA_002076475.1	100	0.01	Neural Network (Specific Model)	11	0.874	207316	327.661	4048610	0.47	3604	119	355176	None
GCA_002076485.1	100	0.01	Neural Network (Specific Model)	11	0.875	215352	329.548	4022899	0.47	3566	103	393161	None
GCA_002076535.1	100	0.01	Neural Network (Specific Model)	11	0.875	207262	328.18	4044237	0.47	3597	113	355176	None
GCA_002076545.1	100	0.01	Neural Network (Specific Model)	11	0.875	247748	330.097	4025010	0.47	3560	96	572885	None
GCA_002076575.1	100	0.01	Neural Network (Specific Model)	11	0.875	235742	329.62	4022861	0.47	3566	102	501192	None
GCA_002076585.1	100	0.01	Neural Network (Specific Model)	11	0.875	215352	329.05	4023442	0.47	3572	102	392578	None
GCA_002076615.1	100	0.01	Neural Network (Specific Model)	11	0.875	235742	330.097	4022979	0.47	3560	95	393161	None
GCA_002076635.1	100	0.01	Neural Network (Specific Model)	11	0.875	249242	329.467	4024326	0.47	3568	102	501192	None
GCA_002076645.1	100	0.01	Neural Network (Specific Model)	11	0.875	235742	329.656	4022193	0.47	3565	99	392925	None
GCA_002076665.1	100	0.01	Neural Network (Specific Model)	11	0.875	247562	329.561	4023405	0.47	3567	99	501192	None
GCA_002076695.1	100	0.01	Neural Network (Specific Model)	11	0.875	215352	329.058	4023189	0.47	3572	108	392695	None
GCA_002076705.1	100	0.01	Neural Network (Specific Model)	11	0.875	246617	329.577	4024773	0.47	3567	104	501194	None
GCA_002076735.1	100	0.01	Neural Network (Specific Model)	11	0.874	235741	328.934	4041711	0.47	3584	102	392689	None
GCA_002076745.1	100	0.01	Neural Network (Specific Model)	11	0.874	299892	328.347	4042748	0.47	3592	110	501186	None
GCA_002076775.1	100	0.01	Neural Network (Specific Model)	11	0.874	211725	329.09	4045625	0.47	3587	98	357855	None
GCA_002076785.1	100	0.01	Neural Network (Specific Model)	11	0.874	246617	329.731	4046809	0.47	3580	95	501192	None
GCA_002078055.1	100	0.01	Neural Network (Specific Model)	11	0.877	198011	330.27	4020592	0.47	3564	57	403244	None
GCA_002078595.1	100	0.01	Neural Network (Specific Model)	11	0.874	211370	328.685	4048514	0.47	3593	98	355176	None
GCA_002078635.1	100	0.01	Neural Network (Specific Model)	11	0.875	235742	330.062	4024330	0.47	3561	93	393050	None
GCA_002078695.1	100	0.01	Neural Network (Specific Model)	11	0.874	235741	328.809	4043231	0.47	3587	106	393044	None
GCA_002078705.1	100	0.01	Neural Network (Specific Model)	11	0.875	249242	329.826	4043733	0.47	3579	92	501115	None
GCA_002078715.1	100	0.01	Neural Network (Specific Model)	11	0.874	299263	329.715	4039107	0.47	3575	96	392695	None
GCA_002078755.1	100	0.01	Neural Network (Specific Model)	11	0.874	249276	328.812	4041320	0.47	3587	99	501186	None
GCA_002078795.1	100	0.01	Neural Network (Specific Model)	11	0.874	235739	329.661	4044226	0.47	3580	96	392695	None
GCA_002078815.1	100	0.01	Neural Network (Specific Model)	11	0.874	246617	329.842	4045740	0.47	3578	95	501192	None
GCA_002078825.1	100	0.01	Neural Network (Specific Model)	11	0.874	247605	329.248	4045510	0.47	3585	99	500876	None
GCA_002097735.1	100	0.02	Neural Network (Specific Model)	11	0.869	185889	320.516	4148676	0.47	3753	194	424133	None
GCA_002097745.1	100	0.03	Neural Network (Specific Model)	11	0.874	133584	319.849	3937137	0.48	3592	249	403921	None
GCA_002097765.1	100	0.04	Neural Network (Specific Model)	11	0.876	198222	323.941	4195572	0.48	3786	113	536413	None
GCA_002097825.1	100	0.04	Neural Network (Specific Model)	11	0.876	167915	324.122	4194523	0.48	3784	112	536401	None
GCA_002097835.1	100	0.03	Neural Network (Specific Model)	11	0.876	212820	324.245	4190491	0.48	3780	96	537423	None
GCA_002097845.1	100	0.04	Neural Network (Specific Model)	11	0.876	235749	323.465	4193261	0.48	3792	111	600692	None
GCA_002097895.1	100	0.04	Neural Network (Specific Model)	11	0.876	235757	324.314	4193899	0.48	3781	93	600700	None
GCA_002097905.1	100	0.01	Neural Network (Specific Model)	11	0.875	298463	329.58	4034260	0.47	3576	89	600694	None
GCA_002097915.1	100	0.04	Neural Network (Specific Model)	11	0.876	299303	323.992	4195639	0.48	3786	101	555328	None
GCA_002097925.1	100	0.01	Neural Network (Specific Model)	11	0.875	246633	328.933	4037096	0.47	3584	95	537419	None
GCA_002097975.1	100	0.01	Neural Network (Specific Model)	11	0.873	246637	325.983	4061319	0.47	3632	151	537423	None
GCA_002097985.1	100	0.01	Neural Network (Specific Model)	11	0.875	235737	328.437	4034679	0.47	3589	110	392692	None
GCA_002097995.1	100	0.03	Neural Network (Specific Model)	11	0.875	166703	324.124	4167720	0.48	3755	125	393194	None
GCA_002098005.1	100	0.01	Neural Network (Specific Model)	11	0.875	216033	328.713	4038804	0.47	3587	98	600706	None
GCA_002098055.1	100	0.01	Neural Network (Specific Model)	11	0.876	225617	329.108	4029921	0.47	3580	118	393136	None
GCA_002098065.1	100	0.01	Neural Network (Specific Model)	11	0.875	246645	328.899	4038667	0.47	3585	93	600706	None
GCA_002098075.1	100	0.01	Neural Network (Specific Model)	11	0.875	274422	329.162	4036149	0.47	3581	83	506140	None
GCA_002098085.1	100	0.01	Neural Network (Specific Model)	11	0.876	114507	318.389	4079517	0.47	3746	319	225587	None
GCA_002098135.1	100	0.01	Neural Network (Specific Model)	11	0.875	173229	328.705	4038086	0.47	3587	109	537419	None
GCA_002098145.1	100	0.01	Neural Network (Specific Model)	11	0.876	215270	328.84	4031104	0.47	3584	126	393136	None
GCA_002098155.1	100	0.01	Neural Network (Specific Model)	11	0.874	246625	328.182	4040267	0.47	3593	120	600566	None
GCA_002098195.1	100	0.01	Neural Network (Specific Model)	11	0.874	246633	327.087	4049584	0.47	3612	129	600700	None
GCA_002098215.1	100	0.03	Neural Network (Specific Model)	11	0.875	246637	324.756	4163534	0.48	3746	108	537423	None
GCA_002098225.1	100	0.05	Neural Network (Specific Model)	11	0.875	246476	322.979	4207521	0.48	3806	106	810555	None
GCA_002098235.1	100	0.05	Neural Network (Specific Model)	11	0.876	274301	319.863	4221472	0.48	3858	154	600572	None
GCA_002098255.1	100	0.01	Neural Network (Specific Model)	11	0.875	246641	324.84	4065320	0.48	3653	145	600585	None
GCA_002098295.1	100	0.01	Neural Network (Specific Model)	11	0.875	246629	328.57	4038332	0.47	3588	108	505831	None
GCA_002098305.1	100	0.01	Neural Network (Specific Model)	11	0.876	235697	328.809	4030126	0.47	3584	130	392324	None
GCA_002098335.1	100	0.01	Neural Network (Specific Model)	11	0.875	299303	329.56	4036397	0.47	3576	90	600706	None
GCA_002098345.1	100	0.01	Neural Network (Specific Model)	11	0.875	168139	328.969	4039049	0.47	3584	100	506118	None
GCA_002098355.1	100	0.04	Neural Network (Specific Model)	11	0.876	246464	323.881	4195851	0.48	3788	105	536405	None
GCA_002098365.1	100	0.04	Neural Network (Specific Model)	11	0.876	246476	323.777	4193176	0.48	3788	99	573661	None
GCA_002098415.1	100	0.04	Neural Network (Specific Model)	11	0.876	166695	323.747	4196807	0.48	3790	112	339765	None
GCA_002098425.1	100	0.04	Neural Network (Specific Model)	11	0.877	176073	322.912	4185376	0.48	3795	154	392630	None
GCA_002098435.1	100	0.04	Neural Network (Specific Model)	11	0.876	235745	324.298	4194264	0.48	3781	113	393393	None
GCA_002098445.1	100	0.04	Neural Network (Specific Model)	11	0.876	215352	323.856	4193944	0.48	3787	114	392696	None
GCA_002098495.1	100	0.01	Neural Network (Specific Model)	11	0.875	246645	329.771	4035506	0.47	3573	96	441330	None
GCA_002098515.1	100	0.01	Neural Network (Specific Model)	11	0.875	246629	328.968	4032160	0.47	3581	101	441854	None
GCA_002098525.1	100	0.01	Neural Network (Specific Model)	11	0.875	165090	328.953	4037351	0.47	3583	109	537431	None
GCA_002098535.1	100	0.04	Neural Network (Specific Model)	11	0.876	246625	324.695	4162416	0.48	3747	105	600686	None
GCA_002098555.1	100	0.02	Neural Network (Specific Model)	11	0.876	166699	323.867	4196567	0.48	3788	118	350728	None
GCA_002098595.1	100	0.04	Neural Network (Specific Model)	11	0.876	246452	324.079	4194205	0.48	3785	95	604677	None
GCA_002098605.1	100	0.01	Neural Network (Specific Model)	11	0.875	235737	329.691	4032037	0.47	3573	108	393383	None
GCA_002098625.1	100	0.04	Neural Network (Specific Model)	11	0.876	274384	324.475	4194365	0.48	3780	92	600712	None
GCA_002098655.1	100	0.01	Neural Network (Specific Model)	11	0.875	240831	329.101	4034073	0.47	3580	101	537414	None
GCA_002098675.1	100	0.01	Neural Network (Specific Model)	11	0.875	198208	329.351	4036655	0.47	3578	100	537423	None
GCA_002098695.1	100	0.04	Neural Network (Specific Model)	11	0.876	235741	323.836	4195830	0.48	3788	124	392696	None
GCA_002098705.1	100	0.01	Neural Network (Specific Model)	11	0.875	246637	328.645	4037201	0.47	3587	98	537423	None
GCA_002098715.1	100	0.01	Neural Network (Specific Model)	11	0.876	197527	328.866	4026090	0.47	3581	126	392531	None
GCA_002098755.1	100	0.01	Neural Network (Specific Model)	11	0.875	299307	328.94	4034980	0.47	3583	90	573492	None
GCA_002098765.1	100	0.01	Neural Network (Specific Model)	11	0.875	235733	329.269	4034875	0.47	3579	108	393807	None
GCA_002098795.1	100	0.01	Neural Network (Specific Model)	11	0.875	235721	328.976	4031863	0.47	3581	121	393140	None
GCA_002098805.1	100	0.01	Neural Network (Specific Model)	11	0.875	246637	328.927	4036202	0.47	3583	93	535908	None
GCA_002098835.1	100	0.01	Neural Network (Specific Model)	11	0.875	235773	328.232	4040221	0.47	3593	105	637960	None
GCA_002098845.1	100	0.04	Neural Network (Specific Model)	11	0.876	198190	324.171	4162346	0.48	3753	112	537411	None
GCA_002098875.1	100	0.01	Neural Network (Specific Model)	11	0.875	246625	327.936	4040112	0.47	3598	110	600686	None
GCA_002098885.1	100	0.01	Neural Network (Specific Model)	11	0.875	235757	329.009	4036548	0.47	3583	95	537419	None
GCA_002098915.1	100	0.01	Neural Network (Specific Model)	11	0.875	299283	328.82	4035667	0.47	3585	95	604677	None
GCA_002098935.1	100	0.01	Neural Network (Specific Model)	11	0.875	274420	329.691	4034640	0.47	3575	85	600694	None
GCA_002098955.1	100	0.01	Neural Network (Specific Model)	11	0.875	215343	329.054	4036351	0.47	3583	124	392356	None
GCA_002098965.1	100	0.01	Neural Network (Specific Model)	11	0.876	235733	328.943	4033489	0.47	3583	109	393152	None
GCA_002098995.1	100	0.01	Neural Network (Specific Model)	11	0.875	235697	328.87	4036015	0.47	3583	111	393391	None
GCA_002099015.1	100	0.01	Neural Network (Specific Model)	11	0.875	246625	328.944	4036556	0.47	3583	107	537411	None
GCA_002099035.1	100	0.01	Neural Network (Specific Model)	11	0.875	235753	329.065	4032775	0.47	3580	101	537415	None
GCA_002099055.1	100	0.01	Neural Network (Specific Model)	11	0.875	168110	328.693	4038651	0.47	3587	103	502164	None
GCA_002099065.1	100	0.01	Neural Network (Specific Model)	11	0.876	235689	328.844	4032716	0.47	3584	118	392914	None
GCA_002099095.1	100	0.04	Neural Network (Specific Model)	11	0.876	235741	325.191	4157755	0.48	3739	120	583623	None
GCA_002099115.1	100	0.01	Neural Network (Specific Model)	11	0.875	235757	329.382	4035087	0.47	3578	94	537419	None
GCA_002099125.1	100	0.01	Neural Network (Specific Model)	11	0.875	235749	328.883	4034250	0.47	3583	101	537411	None
GCA_002102575.1	100	0.03	Neural Network (Specific Model)	11	0.876	172451	321.984	3933642	0.47	3572	117	299085	None
GCA_003205555.1	100	0.01	Neural Network (Specific Model)	11	0.874	206733	328.128	4041743	0.47	3593	119	392718	None
GCA_003205565.1	100	0.01	Neural Network (Specific Model)	11	0.874	215439	328.524	4042522	0.47	3590	114	393184	None
GCA_003205635.1	100	0.01	Neural Network (Specific Model)	11	0.875	215352	329.043	4023664	0.47	3571	110	436076	None
GCA_003205655.1	100	0.01	Neural Network (Specific Model)	11	0.874	215352	327.786	4044573	0.47	3600	122	393411	None
GCA_003205675.1	100	0.01	Neural Network (Specific Model)	11	0.874	215352	328.098	4035264	0.47	3587	105	436862	None
GCA_003205685.1	100	0.01	Neural Network (Specific Model)	11	0.875	235776	329.418	4024131	0.47	3567	104	393051	None
GCA_003205705.1	100	0.01	Neural Network (Specific Model)	11	0.874	231365	328.431	4034068	0.47	3584	94	392678	None
GCA_003205735.1	100	0.01	Neural Network (Specific Model)	11	0.874	215352	327.906	4036071	0.47	3589	112	392696	None
GCA_003205755.1	100	0.01	Neural Network (Specific Model)	11	0.874	231473	327.991	4036290	0.47	3589	106	393051	None
GCA_003205765.1	100	0.01	Neural Network (Specific Model)	11	0.875	215352	330.886	4007874	0.47	3538	103	404430	None
GCA_009799825.1	100	0.02	Neural Network (Specific Model)	11	0.866	2983109	328.017	4042783	0.48	3563	2	2983109	None
GCA_012911575.1	100	0.02	Neural Network (Specific Model)	11	0.87	2096180	329.416	4064748	0.48	3582	25	2096180	None
GCA_013085145.1	100	0.01	Neural Network (Specific Model)	11	0.867	3058772	329.002	4104155	0.48	3610	2	3058772	None
GCA_015741235.1	100	4.54	Neural Network (Specific Model)	11	0.876	268269	325.674	4155153	0.47	3730	75	770998	None
GCA_015741265.1	100	5.63	Neural Network (Specific Model)	11	0.877	205214	329.605	4173520	0.48	3707	122	535864	None
GCA_015741355.1	100	3.57	Neural Network (Specific Model)	11	0.876	246149	326.033	4111652	0.47	3687	94	666007	None
GCA_015746985.1	100	0.48	Neural Network (Specific Model)	11	0.879	95555	328.796	4008025	0.48	3574	120	246323	None
GCA_015747005.1	100	1.31	Neural Network (Specific Model)	11	0.877	168580	328.894	4048934	0.47	3604	80	523040	None
GCA_015747025.1	100	1.3	Neural Network (Specific Model)	11	0.879	91862	328.165	3989852	0.48	3566	126	246327	None
GCA_015747045.1	100	0.67	Neural Network (Specific Model)	11	0.878	123482	328.179	4013518	0.48	3584	115	337545	None
GCA_015747065.1	100	0.22	Neural Network (Specific Model)	11	0.879	172101	330.315	4016560	0.47	3566	81	555040	None
GCA_015747085.1	100	0.82	Neural Network (Specific Model)	11	0.877	95157	327.908	3969878	0.48	3542	141	246315	None
GCA_015747125.1	100	0.38	Neural Network (Specific Model)	11	0.878	113571	328.903	4013404	0.48	3577	109	272203	None
GCA_015747145.1	100	0.65	Neural Network (Specific Model)	11	0.878	105092	326.336	4013129	0.48	3605	140	272232	None
GCA_015747165.1	99.99	0.15	Neural Network (Specific Model)	11	0.878	108370	327.207	4004327	0.48	3587	135	246323	None
GCA_015747185.1	100	0.33	Neural Network (Specific Model)	11	0.878	114441	328.757	4047223	0.48	3609	107	488213	None
GCA_015747205.1	100	0.16	Neural Network (Specific Model)	11	0.879	100535	328.709	4024824	0.48	3590	124	246486	None
GCA_015747225.1	100	0.91	Neural Network (Specific Model)	11	0.879	78597	326.321	4000397	0.48	3595	165	229365	None
GCA_015747235.1	100	1.21	Neural Network (Specific Model)	11	0.879	109306	328.443	4000160	0.48	3571	119	273246	None
GCA_015747265.1	100	0.11	Neural Network (Specific Model)	11	0.879	118243	328.507	4001843	0.48	3572	113	415608	None
GCA_015749965.1	99.99	0.06	Neural Network (Specific Model)	11	0.878	107977	326.265	4011024	0.48	3602	157	246185	None
GCA_015750005.1	100	0.07	Neural Network (Specific Model)	11	0.877	105237	328.042	4027461	0.48	3595	127	276020	None
GCA_015750145.1	100	5.16	Neural Network (Specific Model)	11	0.878	118079	328.417	4006987	0.48	3575	82	327106	None
GCA_015750205.1	100	0.38	Neural Network (Specific Model)	11	0.877	126064	327.679	4012467	0.48	3585	124	445156	None
GCA_015750285.1	100	7.03	Neural Network (Specific Model)	11	0.878	151417	327.443	4297982	0.48	3847	88	459488	None
GCA_015750305.1	100	2.63	Neural Network (Specific Model)	11	0.877	235581	328.098	4123478	0.48	3680	78	554996	None
GCA_015750345.1	100	5.08	Neural Network (Specific Model)	11	0.878	246323	328.474	4218293	0.47	3764	74	554990	None
GCA_015750365.1	100	4.91	Neural Network (Specific Model)	11	0.878	92138	326.175	4157647	0.48	3737	142	265285	None
GCA_015750405.4	100	9.06	Neural Network (Specific Model)	11	0.878	246323	328.62	4355528	0.47	3885	74	595171	None
GCA_015750465.1	100	1.02	Neural Network (Specific Model)	11	0.876	205416	328.891	4088513	0.47	3636	69	415779	None
GCA_015750485.1	99.99	6.38	Neural Network (Specific Model)	11	0.878	235579	327.637	4241555	0.48	3793	68	554996	None
GCA_015750505.1	100	5.07	Neural Network (Specific Model)	11	0.878	246323	329.619	4210939	0.47	3744	72	595171	None
GCA_015750525.1	100	0.2	Neural Network (Specific Model)	11	0.877	246323	328.257	4091896	0.47	3649	61	595185	None
GCA_015750545.1	100	6.93	Neural Network (Specific Model)	11	0.878	198438	327.956	4290942	0.48	3835	76	569825	None
GCA_015750565.1	100	7.05	Neural Network (Specific Model)	11	0.878	235581	328.751	4325962	0.47	3857	76	415804	None
GCA_015750585.1	100	6.59	Neural Network (Specific Model)	11	0.878	166727	327.826	4235081	0.48	3786	88	552509	None
GCA_015750605.1	100	5.82	Neural Network (Specific Model)	11	0.878	173422	328.48	4216094	0.48	3761	81	569757	None
GCA_015750645.1	100	0.27	Neural Network (Specific Model)	11	0.878	69697	327.35	4009683	0.48	3590	182	183163	None
GCA_015750665.1	100	4.17	Neural Network (Specific Model)	11	0.878	235581	329.124	4170528	0.47	3711	70	523046	None
GCA_015750685.1	99.99	0.26	Neural Network (Specific Model)	11	0.879	82073	325.589	3978208	0.48	3583	181	272451	None
GCA_015750705.1	100	3.2	Neural Network (Specific Model)	11	0.877	299106	328.714	4147412	0.48	3694	63	685095	None
GCA_015750725.4	100	9.06	Neural Network (Specific Model)	11	0.878	246519	328.781	4356600	0.48	3883	71	800854	None
GCA_015750745.4	100	9.06	Neural Network (Specific Model)	11	0.878	246323	329.05	4344406	0.48	3869	69	632547	None
GCA_015750765.1	100	2.04	Neural Network (Specific Model)	11	0.877	235472	327.569	4079680	0.48	3646	80	523047	None
GCA_015750785.4	100	9.06	Neural Network (Specific Model)	11	0.878	299106	329.077	4355776	0.47	3880	71	595265	None
GCA_015750795.1	100	0.75	Neural Network (Specific Model)	11	0.877	246435	328.631	4059773	0.47	3615	71	597232	None
GCA_015750825.1	100	4.81	Neural Network (Specific Model)	11	0.877	135195	327.974	4155141	0.48	3709	91	459435	None
GCA_015750845.1	100	3.96	Neural Network (Specific Model)	11	0.877	151421	327.353	4092555	0.48	3661	90	564602	None
GCA_015750865.1	100	5.09	Neural Network (Specific Model)	11	0.878	167506	328.996	4226830	0.47	3765	75	427561	None
GCA_015750885.4	100	9.06	Neural Network (Specific Model)	11	0.878	246323	328.863	4356364	0.47	3882	71	800683	None
GCA_015750905.1	99.99	1.08	Neural Network (Specific Model)	11	0.879	94933	327.35	4033808	0.48	3616	149	246155	None
GCA_015750915.1	100	1.78	Neural Network (Specific Model)	11	0.88	129873	328.382	4052886	0.48	3623	127	324521	None
GCA_015750945.1	99.98	2.24	Neural Network (Specific Model)	11	0.883	58159	326.469	4042468	0.48	3648	183	229623	None
GCA_015750965.1	100	1.86	Neural Network (Specific Model)	11	0.877	173421	328.739	4065843	0.48	3621	85	447697	None
GCA_015750975.1	100	0.32	Neural Network (Specific Model)	11	0.877	197653	328.944	4084054	0.48	3633	72	597776	None
GCA_015750995.1	100	2.19	Neural Network (Specific Model)	11	0.878	172153	329.043	4076271	0.48	3630	86	447681	None
GCA_015751005.1	100	1.58	Neural Network (Specific Model)	11	0.88	92015	327.829	4037281	0.48	3617	141	328044	None
GCA_015753925.1	100	6.63	Neural Network (Specific Model)	11	0.879	180763	322.649	4384914	0.48	3989	115	495036	None
GCA_015754985.1	100	5.99	Neural Network (Specific Model)	11	0.879	205292	330.394	4040181	0.48	3587	102	523048	None
GCA_015755065.1	100	5.42	Neural Network (Specific Model)	11	0.879	227632	328.55	4108820	0.48	3669	93	523045	None
GCA_015755125.1	100	6.66	Neural Network (Specific Model)	11	0.878	299119	327.936	4121092	0.48	3683	100	523048	None
GCA_015755145.1	100	5.58	Neural Network (Specific Model)	11	0.879	205416	328.509	4138219	0.48	3697	100	523050	None
GCA_015755165.1	100	5.45	Neural Network (Specific Model)	11	0.879	246155	327.486	4118213	0.48	3690	98	523068	None
GCA_015755185.1	100	5.53	Neural Network (Specific Model)	11	0.879	246156	328.023	4136023	0.48	3699	102	427808	None
GCA_015755205.1	100	5.55	Neural Network (Specific Model)	11	0.879	180735	329.395	4103033	0.48	3653	105	400425	None
GCA_015755225.1	100	4.2	Neural Network (Specific Model)	11	0.879	227633	327.968	4073523	0.48	3643	88	523046	None
GCA_015755245.1	100	5.69	Neural Network (Specific Model)	11	0.878	246152	328.214	4106301	0.48	3667	102	523048	None
GCA_015755265.1	100	5.59	Neural Network (Specific Model)	11	0.878	246160	330.315	4094171	0.48	3634	93	522882	None
GCA_015774795.1	100	0.19	Neural Network (Specific Model)	11	0.875	246569	324.714	4087342	0.47	3676	74	665964	None
GCA_015818575.1	100	4.52	Neural Network (Specific Model)	11	0.878	246323	329.371	4117345	0.47	3664	67	595233	None
GCA_015818615.1	100	3.31	Neural Network (Specific Model)	11	0.878	229566	329.171	4093708	0.47	3642	66	523040	None
GCA_015818635.1	100	6.12	Neural Network (Specific Model)	11	0.878	246323	329.623	4147328	0.47	3688	65	597415	None
GCA_015818655.1	100	4.68	Neural Network (Specific Model)	11	0.879	246323	329.288	4162745	0.47	3709	72	595233	None
GCA_015819115.1	100	5.87	Neural Network (Specific Model)	11	0.879	235582	329.268	4193094	0.47	3735	65	523040	None
GCA_015819135.1	100	6.64	Neural Network (Specific Model)	11	0.879	235582	329.602	4197500	0.47	3736	72	595233	None
GCA_015819185.1	100	2.19	Neural Network (Specific Model)	11	0.878	235582	329.502	4111193	0.47	3658	64	595233	None
GCA_015958885.1	100	1.25	Neural Network (Specific Model)	11	0.88	73558	326.548	4003672	0.48	3601	181	183246	None
GCA_015958965.1	99.99	4.4	Neural Network (Specific Model)	11	0.88	79935	326.566	4091163	0.48	3678	150	261170	None
GCA_015959045.1	100	0.13	Neural Network (Specific Model)	11	0.875	246149	325.793	4029269	0.47	3612	92	585473	None
GCA_015959105.1	100	5.29	Neural Network (Specific Model)	11	0.876	300078	323.376	4192124	0.47	3790	71	770998	None
GCA_015959125.1	100	1.99	Neural Network (Specific Model)	11	0.878	83578	317.642	4176709	0.47	3853	131	246301	None
GCA_015959145.1	100	1.03	Neural Network (Specific Model)	11	0.88	58867	327.486	3985282	0.48	3572	189	246519	None
GCA_015959165.1	100	3.81	Neural Network (Specific Model)	11	0.879	68000	326.442	4016370	0.48	3611	185	246323	None
GCA_016134565.1	100	4.18	Neural Network (Specific Model)	11	0.875	247670	313.983	4365536	0.47	4061	75	770995	None
GCA_016140185.1	100	5.45	Neural Network (Specific Model)	11	0.877	99900	324.152	4171725	0.48	3766	148	280423	None
GCA_016164155.1	100	1.11	Neural Network (Specific Model)	11	0.881	62848	327.394	3990056	0.48	3582	183	151131	None
GCA_018036305.1	99.98	3.86	Neural Network (Specific Model)	11	0.88	75977	322.081	4302819	0.48	3925	168	187673	None
GCA_018073665.1	100	0.36	Neural Network (Specific Model)	11	0.88	69248	327.737	3972664	0.48	3562	183	183263	None
GCA_018073725.1	100	0.45	Neural Network (Specific Model)	11	0.878	134297	328.707	4043425	0.48	3606	95	357546	None
GCA_018073745.1	100	1.67	Neural Network (Specific Model)	11	0.878	198435	329.044	4054901	0.47	3611	86	523040	None
GCA_018073925.1	100	0.22	Neural Network (Specific Model)	11	0.879	90280	327.958	3987474	0.48	3567	137	246323	None
GCA_018073945.1	100	0.57	Neural Network (Specific Model)	11	0.879	98724	328.675	4072772	0.48	3637	113	250150	None
GCA_018073965.1	100	2.93	Neural Network (Specific Model)	11	0.879	114847	328.256	4056639	0.48	3625	114	246323	None
GCA_018073985.1	99.99	0.13	Neural Network (Specific Model)	11	0.879	76890	327.224	4001549	0.48	3586	166	229311	None
GCA_018074005.1	100	0.27	Neural Network (Specific Model)	11	0.879	94924	329.415	4002795	0.48	3565	116	246180	None
GCA_018074025.1	100	1.06	Neural Network (Specific Model)	11	0.878	157147	329.529	4018068	0.47	3571	87	446859	None
GCA_018074045.1	100	1.2	Neural Network (Specific Model)	11	0.879	74547	327.406	4005226	0.48	3589	160	246306	None
GCA_018074085.1	100	0.12	Neural Network (Specific Model)	11	0.877	166733	328.579	4046210	0.47	3606	84	446543	None
GCA_018074625.1	99.99	5.84	Neural Network (Specific Model)	11	0.878	151421	328.259	4198992	0.48	3750	92	447089	None
GCA_018074665.1	100	6.81	Neural Network (Specific Model)	11	0.878	235581	329.058	4291354	0.47	3822	70	632419	None
GCA_018074685.1	100	7.03	Neural Network (Specific Model)	11	0.878	235581	328.718	4313371	0.48	3845	74	632506	None
GCA_018074705.1	100	5.24	Neural Network (Specific Model)	11	0.877	246323	328.462	4188220	0.48	3734	69	632394	None
GCA_018074725.1	100	6.68	Neural Network (Specific Model)	11	0.878	246152	328.047	4279016	0.48	3821	71	554984	None
GCA_018074745.1	100	3.27	Neural Network (Specific Model)	11	0.877	197654	328.675	4110747	0.48	3662	77	595270	None
GCA_018074765.1	100	1.15	Neural Network (Specific Model)	11	0.877	197654	328.577	4069209	0.48	3624	71	632655	None
GCA_018074785.1	100	1.57	Neural Network (Specific Model)	11	0.877	235579	328.411	4113946	0.47	3667	72	523050	None
GCA_018074805.1	100	3.66	Neural Network (Specific Model)	11	0.877	165263	327.828	4168792	0.48	3723	88	488236	None
GCA_018074825.1	100	5.2	Neural Network (Specific Model)	11	0.879	151421	328.389	4244401	0.48	3791	92	425827	None
GCA_018074845.1	100	4.74	Neural Network (Specific Model)	11	0.877	172225	328.4	4162704	0.48	3711	80	503191	None
GCA_018074885.1	100	0.05	Neural Network (Specific Model)	11	0.877	116946	325.339	3994873	0.48	3595	170	378744	None
GCA_018074905.1	100	0.06	Neural Network (Specific Model)	11	0.877	154334	327.445	4020050	0.48	3592	94	488228	None
GCA_018074925.1	100	0.1	Neural Network (Specific Model)	11	0.877	235581	329.402	4037087	0.47	3588	83	523048	None
GCA_018074955.1	100	0.06	Neural Network (Specific Model)	11	0.877	167397	328.714	4031922	0.48	3590	96	501895	None
GCA_018074985.1	100	0.06	Neural Network (Specific Model)	11	0.878	95928	326.472	4009517	0.48	3600	159	246155	None
GCA_018075015.1	99.99	0.91	Neural Network (Specific Model)	11	0.877	109364	327.285	4032023	0.48	3605	133	365141	None
GCA_018075045.1	99.99	0.08	Neural Network (Specific Model)	11	0.879	76232	325.19	3977392	0.48	3589	208	246155	None
GCA_018075065.4	100	8.22	Neural Network (Specific Model)	11	0.878	299106	328.686	4306655	0.48	3840	67	800802	None
GCA_018075105.1	100	0.13	Neural Network (Specific Model)	11	0.878	163845	328.993	4033757	0.48	3591	96	357603	None
GCA_018083565.4	100	9.06	Neural Network (Specific Model)	11	0.878	299106	329.045	4356005	0.47	3880	72	800801	None
GCA_018083625.4	100	9.06	Neural Network (Specific Model)	11	0.878	246310	328.185	4335450	0.48	3870	73	632453	None
GCA_018083665.1	100	1.81	Neural Network (Specific Model)	11	0.877	235581	328.016	4083823	0.48	3643	78	554984	None
GCA_018083685.1	100	0.13	Neural Network (Specific Model)	11	0.877	166732	329.484	4043814	0.48	3592	87	393590	None
GCA_018083705.1	100	6.23	Neural Network (Specific Model)	11	0.878	235581	329.452	4318466	0.47	3841	67	523057	None
GCA_018083725.1	100	0.23	Neural Network (Specific Model)	11	0.877	235581	329.071	4053070	0.47	3603	74	523049	None
GCA_018083745.1	99.99	0.22	Neural Network (Specific Model)	11	0.878	105044	327.585	4029743	0.48	3604	137	265274	None
GCA_018083765.1	100	1.55	Neural Network (Specific Model)	11	0.878	105056	327.321	4062893	0.48	3635	119	246431	None
GCA_018083785.1	99.99	1.65	Neural Network (Specific Model)	11	0.878	105079	326.883	4015201	0.48	3599	132	271565	None
GCA_018083805.1	100	1.58	Neural Network (Specific Model)	11	0.877	246273	328.67	4091955	0.47	3645	69	632320	None
GCA_018083825.1	100	1.06	Neural Network (Specific Model)	11	0.877	173421	328.464	4060730	0.47	3618	78	632028	None
GCA_018083845.1	99.99	3.55	Neural Network (Specific Model)	11	0.879	100021	327.458	4091003	0.48	3663	130	246155	None
GCA_018083865.1	100	1.82	Neural Network (Specific Model)	11	0.877	246153	328.709	4098179	0.48	3650	72	632426	None
GCA_018083925.1	100	2.22	Neural Network (Specific Model)	11	0.877	246283	328.593	4059209	0.47	3617	70	554989	None
GCA_018398015.1	100	0.01	Neural Network (Specific Model)	11	0.872	303299	325.841	4072403	0.47	3638	138	573369	None
GCA_018398025.1	100	0.01	Neural Network (Specific Model)	11	0.872	318887	323.855	4067190	0.47	3656	171	555286	None
GCA_018398035.1	100	0.01	Neural Network (Specific Model)	11	0.873	350768	320.26	4078584	0.47	3711	207	806589	None
GCA_018398045.1	100	0.5	Neural Network (Specific Model)	11	0.873	350736	321.951	4070364	0.47	3682	199	637950	None
GCA_018398085.1	100	1.88	Neural Network (Specific Model)	11	0.871	350768	305.846	4167128	0.47	3962	472	806585	None
GCA_018398115.1	100	0.01	Neural Network (Specific Model)	11	0.873	299331	326.29	4054900	0.47	3621	136	741843	None
GCA_018398135.1	100	0.02	Neural Network (Specific Model)	11	0.873	322871	325.878	4056526	0.47	3626	133	555318	None
GCA_018398155.1	100	0.03	Neural Network (Specific Model)	11	0.873	350756	262.927	4436333	0.49	4917	1356	806576	None
GCA_018398195.1	100	0.01	Neural Network (Specific Model)	11	0.874	322856	327.489	4043968	0.47	3601	105	555300	None
GCA_018398205.1	100	0.01	Neural Network (Specific Model)	11	0.873	350736	323.878	4063305	0.47	3654	161	806437	None
GCA_018398235.1	100	0.11	Neural Network (Specific Model)	11	0.872	303260	321.358	4091474	0.47	3705	205	600470	None
GCA_018398255.1	100	0.01	Neural Network (Specific Model)	11	0.873	350736	321.063	4073734	0.47	3695	211	637947	None
GCA_018916525.1	100	0.97	Neural Network (Specific Model)	11	0.872	350768	312.715	4143928	0.48	3857	337	806530	None
GCA_018916535.1	100	0.2	Neural Network (Specific Model)	11	0.872	299343	321.957	4073703	0.47	3684	193	741855	None
GCA_018916555.1	100	1	Neural Network (Specific Model)	11	0.87	291883	271.51	4338714	0.48	4641	1169	627791	None
GCA_018916585.1	100	0.03	Neural Network (Specific Model)	11	0.871	350776	314.42	4117661	0.48	3808	319	806594	None
GCA_018929285.1	100	0.21	Neural Network (Specific Model)	11	0.876	198550	315.751	4067327	0.47	3768	349	523235	None
GCA_018929315.1	100	1.07	Neural Network (Specific Model)	11	0.875	215395	311.205	4089253	0.47	3837	473	523235	None
GCA_018929375.1	100	0.19	Neural Network (Specific Model)	11	0.876	167893	313.183	4079823	0.47	3807	420	523235	None
GCA_018929395.1	100	0.48	Neural Network (Specific Model)	11	0.874	198846	303.866	4143332	0.47	3978	585	392323	None
GCA_018929415.1	100	0.34	Neural Network (Specific Model)	11	0.873	198889	292.276	4185341	0.47	4174	805	523235	None
GCA_018929475.1	100	1.2	Neural Network (Specific Model)	11	0.874	167893	296.644	4162678	0.47	4094	728	366243	None
GCA_018929625.1	100	9.01	Neural Network (Specific Model)	11	0.878	48628	314.447	4386112	0.47	4086	378	221560	None
GCA_018929655.1	100	1.71	Neural Network (Specific Model)	11	0.87	49386	286.261	4350860	0.47	4414	959	151412	None
GCA_018929675.1	100	5.2	Neural Network (Specific Model)	11	0.878	53339	317.094	4277486	0.47	3952	327	188170	None
GCA_018929815.1	100	9.82	Neural Network (Specific Model)	11	0.874	66457	302.206	4424736	0.48	4269	638	253218	None
GCA_020162055.1	100	0.49	Neural Network (Specific Model)	11	0.877	235581	328.029	4068735	0.47	3630	88	501895	None
GCA_020171135.1	100	0.26	Neural Network (Specific Model)	11	0.877	109374	327.883	4076724	0.48	3641	121	310703	None
GCA_020171165.1	100	3.19	Neural Network (Specific Model)	11	0.878	163025	328.398	4193904	0.47	3741	85	559536	None
GCA_020172345.1	100	0.16	Neural Network (Specific Model)	11	0.877	134522	327.97	4050362	0.48	3614	106	446660	None
GCA_020172365.1	100	0.87	Neural Network (Specific Model)	11	0.877	166728	327.979	4056439	0.48	3621	101	446540	None
GCA_020172405.1	99.99	0.3	Neural Network (Specific Model)	11	0.878	100583	327.743	4095099	0.48	3662	124	246356	None
GCA_020172415.1	100	0.66	Neural Network (Specific Model)	11	0.877	235581	328.445	4060175	0.47	3617	89	446568	None
GCA_020172565.1	100	0.26	Neural Network (Specific Model)	11	0.877	246155	328.427	4066558	0.47	3623	81	501895	None
GCA_020175555.1	100	2.14	Neural Network (Specific Model)	11	0.878	110972	327.714	4032295	0.48	3604	105	272206	None
GCA_020175875.1	100	3.7	Neural Network (Specific Model)	11	0.878	151417	327.873	4191639	0.47	3746	95	576573	None
GCA_020175895.1	100	1.25	Neural Network (Specific Model)	11	0.877	135411	326.742	4056160	0.48	3633	105	272441	None
GCA_020175915.1	100	0.2	Neural Network (Specific Model)	11	0.877	159216	328.875	4040018	0.47	3595	91	553031	None
GCA_020175935.1	100	0.06	Neural Network (Specific Model)	11	0.876	235581	328.996	4052044	0.47	3602	76	554977	None
GCA_020175955.1	100	3.6	Neural Network (Specific Model)	11	0.877	151440	327.857	4096566	0.48	3656	87	579464	None
GCA_020175995.1	100	3.84	Neural Network (Specific Model)	11	0.878	133210	327.755	4113968	0.48	3676	98	273482	None
GCA_020176075.1	100	1.72	Neural Network (Specific Model)	11	0.878	92194	327.517	4040400	0.48	3615	145	229453	None
GCA_020176195.1	100	4.38	Neural Network (Specific Model)	11	0.878	246155	328.959	4196890	0.47	3738	83	554984	None
GCA_020181315.1	100	2.26	Neural Network (Specific Model)	11	0.877	167185	327.651	4087405	0.48	3652	100	487387	None
GCA_020181915.1	100	3.52	Neural Network (Specific Model)	11	0.878	95368	327.182	4099158	0.48	3672	133	246323	None
GCA_020181935.1	100	0.12	Neural Network (Specific Model)	11	0.877	235581	328.717	4067122	0.47	3620	79	554978	None
GCA_020182075.1	99.99	1.73	Neural Network (Specific Model)	11	0.877	163001	327.553	4097497	0.48	3662	94	632305	None
GCA_020186095.1	100	1.81	Neural Network (Specific Model)	11	0.877	140371	328.53	4088130	0.48	3641	94	356328	None
GCA_020214905.1	100	0.13	Neural Network (Specific Model)	11	0.878	126741	327.704	4038397	0.48	3610	140	265348	None
GCA_024105835.1	100	0	Neural Network (Specific Model)	11	0.869	172960	330.466	4002022	0.48	3514	162	671161	None
GCA_024105855.1	100	0.24	Neural Network (Specific Model)	11	0.87	174453	323.292	4044298	0.48	3634	206	375461	None
GCA_024393815.1	100	1.17	Neural Network (Specific Model)	11	0.877	235581	328.173	4080106	0.48	3639	93	523045	None
GCA_024393835.1	99.99	1.94	Neural Network (Specific Model)	11	0.877	151421	327.431	4086236	0.48	3653	113	439670	None
GCA_024393855.1	100	1.11	Neural Network (Specific Model)	11	0.877	235581	328.002	4074521	0.47	3634	98	427595	None
GCA_024393875.1	100	0.16	Neural Network (Specific Model)	11	0.877	152279	328.16	4058432	0.48	3620	104	510407	None
GCA_024393895.1	100	0.13	Neural Network (Specific Model)	11	0.877	158590	327.869	4060348	0.48	3623	103	393348	None
GCA_024393915.1	100	0.44	Neural Network (Specific Model)	11	0.877	145276	327.651	4042746	0.48	3612	123	427593	None
GCA_025504985.1	100	0.01	Neural Network (Specific Model)	11	0.874	246549	325.642	4090621	0.47	3666	86	608267	None
GCA_025505005.1	100	0.01	Neural Network (Specific Model)	11	0.874	247191	326.206	4087318	0.47	3657	74	801058	None
GCA_025505035.1	100	0.01	Neural Network (Specific Model)	11	0.874	299378	325.945	4088232	0.47	3660	80	801834	None
GCA_025505055.1	100	0.01	Neural Network (Specific Model)	11	0.875	246548	327.641	4040597	0.47	3600	86	608044	None
GCA_025505075.1	100	0.02	Neural Network (Specific Model)	11	0.873	261802	322.017	4039663	0.48	3657	70	523403	None
GCA_025505095.1	100	0.01	Neural Network (Specific Model)	11	0.874	235839	325.983	4089876	0.47	3661	82	801834	None
GCA_025505115.1	100	0.01	Neural Network (Specific Model)	11	0.873	333408	328.732	3964518	0.48	3513	63	711979	None
GCA_025505135.1	100	0.01	Neural Network (Specific Model)	11	0.873	302254	329.385	3963057	0.48	3504	77	640233	None
GCA_025505155.1	100	0.03	Neural Network (Specific Model)	11	0.871	180306	326.578	3961051	0.48	3526	103	782543	None
GCA_025505175.1	100	0.15	Neural Network (Specific Model)	11	0.873	535445	327.753	3917927	0.48	3483	74	891801	None
[truncated: 2,311 more rows]

## Sheet: Table S3
Sample	# contigs (>= 0 bp)	# contigs (>= 1000 bp)	# contigs (>= 5000 bp)	# contigs (>= 10000 bp)	# contigs (>= 25000 bp)	# contigs (>= 50000 bp)	Total length (>= 0 bp)	Total length (>= 1000 bp)	Total length (>= 5000 bp)	Total length (>= 10000 bp)	Total length (>= 25000 bp)	Total length (>= 50000 bp)	# contigs	Largest contig	Total length	GC (%)	N50	N90	auN	L50	L90	# N's per 100 kbp
[truncated: 3,076 more rows]

[truncated: 4 more sheets: Table S4, Table S55, Table S6, Table S7]
